# Supplementary material for: Survival of natural glass under hyperalkaline conditions for ~4000 years
Source: Research Square preprint supplement (doi:10.21203/rs.3.rs-1721591/v1), 2022-06-16
Supplement: Supplementary file 1 [file edeb38fdd5895dbbcded91e4.xlsx]

## Sheet: Fig.4 & Supplementary Fig.1
			HAADF	C	O	Na	Mg	Al	Si	Fe	K	Ca
Position			Intensity	Net intensity	Net intensity	Net intensity	Net intensity	Net intensity	Net intensity	Net intensity	Net intensity	Net intensity
nm	um	m	Counts	Counts	Counts	Counts	Counts	Counts	Counts	Counts	Counts	Counts
0	0	0	29590.3	0.0854894	8.50947	0.46082	0.156732	2.0364	10.4442	0.324516	0.758931	0.257653
8.58005	0.00858005	8.58005e-09	29178.6	0.0806828	8.46738	0.444012	0.237182	2.106	10.0857	0.336767	0.918648	0.283776
17.1601	0.0171601	1.71601e-08	29353.4	0.0807655	8.91074	0.3946	0.249354	2.06499	10.3384	0.434351	1.04519	0.320553
25.7401	0.0257401	2.57401e-08	29060.4	0.128942	9.05662	0.367856	0.17635	1.9481	10.5544	0.441466	0.949315	0.309697
34.3202	0.0343202	3.43202e-08	29143.5	0.192169	8.41456	0.425243	0.189733	1.8382	10.2252	0.338629	0.846585	0.281365
42.9003	0.0429003	4.29003e-08	29346.7	0.176405	8.00164	0.474809	0.241486	1.79157	10.1057	0.298707	0.908975	0.211266
51.4803	0.0514803	5.14803e-08	29339.8	0.112032	8.20326	0.446761	0.16424	1.8234	10.0451	0.358799	0.977455	0.179481
60.0604	0.0600604	6.00604e-08	28988.9	0.0657571	8.66021	0.356702	0.0997791	1.81112	9.6383	0.38052	1.00075	0.219257
68.6404	0.0686404	6.86404e-08	28767.4	0.0490043	8.7886	0.315821	0.15222	1.79955	9.21642	0.235099	0.971249	0.2426
77.2205	0.0772205	7.72205e-08	28800	0.085645	8.61264	0.367654	0.204377	1.77038	8.90413	0.137642	0.780743	0.252982
85.8005	0.0858005	8.58005e-08	29018.9	0.121901	8.14602	0.446744	0.189178	1.73099	8.74602	0.188804	0.65402	0.31067
94.3806	0.0943806	9.43806e-08	29032.3	0.0735535	7.76073	0.519174	0.189607	1.85105	8.96425	0.263771	0.734178	0.36776
102.961	0.102961	1.02961e-07	29010.4	0.0269083	8.30063	0.593462	0.190936	2.01016	9.47295	0.308431	0.89372	0.349813
111.541	0.111541	1.11541e-07	28933	0.0370815	9.16844	0.613346	0.151034	2.26623	9.68514	0.346446	1.01192	0.318709
120.121	0.120121	1.20121e-07	29237	0.053161	9.2113	0.637231	0.161953	2.51804	9.41905	0.315366	1.03357	0.330659
128.701	0.128701	1.28701e-07	29055.8	0.031509	8.93556	0.671837	0.236689	2.56506	9.24999	0.20044	0.966959	0.408733
137.281	0.137281	1.37281e-07	29044.7	0.00907627	8.96163	0.634867	0.23306	2.55232	9.77905	0.235846	0.978197	0.518186
145.861	0.145861	1.45861e-07	28942.6	0.0151321	9.17066	0.651378	0.126879	2.40927	10.3762	0.394606	1.03522	0.544701
154.441	0.154441	1.54441e-07	29034.3	0.0523249	9.06532	0.725686	0.0837537	2.12037	10.5143	0.393316	0.951483	0.501886
163.021	0.163021	1.63021e-07	29042.3	0.0988402	8.58507	0.751601	0.135409	1.98873	10.3999	0.314943	0.949384	0.480677
171.601	0.171601	1.71601e-07	28892.1	0.12772	8.21921	0.739236	0.191945	1.95474	10.0679	0.341568	0.948513	0.4692
180.181	0.180181	1.80181e-07	28903.8	0.128472	8.43822	0.810377	0.237027	1.8629	10.041	0.360926	0.870346	0.473556
188.761	0.188761	1.88761e-07	29110.8	0.0840464	9.02706	0.823851	0.240339	1.70501	10.211	0.254625	0.966098	0.473873
197.341	0.197341	1.97341e-07	29126.6	0.0596959	9.47709	0.724263	0.181877	1.49242	10.1745	0.182725	1.10548	0.471275
205.921	0.205921	2.05921e-07	29252.9	0.0568977	9.65497	0.724364	0.20725	1.45066	9.97638	0.245506	1.08408	0.46919
214.501	0.214501	2.14501e-07	29248.5	0.0427269	9.41126	0.855041	0.308486	1.54611	9.3617	0.295697	1.1303	0.391853
223.081	0.223081	2.23081e-07	29108.3	0.0439956	9.03151	0.89498	0.296838	1.63421	8.87316	0.243441	1.2013	0.273253
231.661	0.231661	2.31661e-07	29249.6	0.0609396	9.25553	0.726183	0.25857	1.91142	9.09732	0.196454	1.1601	0.21321
240.241	0.240241	2.40241e-07	29279.8	0.0906428	9.84437	0.551853	0.272752	2.12352	9.62705	0.238369	1.07369	0.209607
248.822	0.248822	2.48822e-07	29028.1	0.108154	9.78192	0.580145	0.209647	2.07812	9.34633	0.335011	1.05033	0.225548
257.401	0.257402	2.57402e-07	29092.2	0.062604	9.53355	0.66897	0.120452	1.9776	8.75324	0.374542	1.08041	0.21701
265.982	0.265982	2.65982e-07	29059.3	0.0150484	9.6645	0.7008	0.139631	1.7911	9.00824	0.273514	1.12824	0.213474
274.562	0.274562	2.74562e-07	29281.7	0.00215316	9.84019	0.70073	0.234318	1.57944	9.7077	0.135496	1.10667	0.227427
283.142	0.283142	2.83142e-07	28990	0.00314431	9.87987	0.673679	0.288664	1.56144	10.083	0.100529	1.05438	0.290886
291.722	0.291722	2.91722e-07	28884.3	0.00728179	9.54298	0.723203	0.275083	1.76836	10.0337	0.16038	0.970037	0.349503
300.302	0.300302	3.00302e-07	28990.7	0.0153908	9.06021	0.788435	0.26767	1.92718	9.88419	0.252965	0.894058	0.361939
308.882	0.308882	3.08882e-07	29201.8	0.0418389	9.24852	0.845489	0.245593	1.85138	9.98926	0.365962	0.969317	0.374063
317.462	0.317462	3.17462e-07	29163.6	0.0720818	10.3292	0.832629	0.176601	1.67227	9.66391	0.438432	1.11243	0.412759
326.042	0.326042	3.26042e-07	29193.8	0.0614473	11.0219	0.792221	0.140782	1.51708	9.19636	0.42013	1.2829	0.47512
334.622	0.334622	3.34622e-07	29057	0.0313437	10.692	0.722067	0.155302	1.6155	9.18729	0.343721	1.29358	0.394309
343.202	0.343202	3.43202e-07	29253.1	0.0220518	10.0455	0.608989	0.17727	1.81232	9.29166	0.2205	1.10619	0.29091
351.782	0.351782	3.51782e-07	29182	0.0426938	9.59867	0.548825	0.214732	1.95982	9.10004	0.147719	0.886884	0.309022
360.362	0.360362	3.60362e-07	28967.8	0.0736793	9.53909	0.567862	0.252083	2.22731	9.08263	0.154986	0.709928	0.347895
368.942	0.368942	3.68942e-07	29314.3	0.0815059	9.68028	0.594375	0.226497	2.26938	9.85188	0.194442	0.66062	0.380744
377.522	0.377522	3.77522e-07	29266.3	0.0775214	10.1545	0.602387	0.198551	2.01003	10.6129	0.225372	0.695118	0.476976
386.102	0.386102	3.86102e-07	29115.2	0.0674606	10.0103	0.652624	0.194788	1.8731	10.3167	0.249121	0.667549	0.458389
394.682	0.394682	3.94682e-07	29323.3	0.0480729	9.29753	0.69367	0.130124	1.82595	9.86011	0.305147	0.739991	0.355407
403.262	0.403262	4.03262e-07	29315.8	0.0355275	9.11926	0.705885	0.105375	1.69195	9.78773	0.334271	1.00739	0.350616
411.842	0.411843	4.11842e-07	29163.6	0.0385457	9.38718	0.702562	0.135157	1.73778	9.69224	0.356322	1.20261	0.356879
420.423	0.420423	4.20423e-07	29399.7	0.0492009	10.108	0.641911	0.133798	1.79928	9.65273	0.365762	1.27903	0.312795
429.003	0.429003	4.29003e-07	29069.4	0.0689864	10.9581	0.568145	0.14594	1.69846	9.51691	0.286459	1.32398	0.300961
437.583	0.437583	4.37583e-07	29280.5	0.072132	11.0151	0.542448	0.189856	1.73838	9.19728	0.197142	1.20324	0.3152
446.163	0.446163	4.46163e-07	29277.4	0.0548525	10.5949	0.540989	0.235104	1.93154	8.99714	0.184949	1.11315	0.28472
454.743	0.454743	4.54743e-07	29278.1	0.0439938	10.6172	0.542372	0.259496	2.04758	9.2217	0.197547	1.03531	0.284858
463.323	0.463323	4.63323e-07	29272.5	0.0497585	10.717	0.478391	0.312053	2.14174	9.7958	0.216429	0.910228	0.343677
471.903	0.471903	4.71903e-07	29422.6	0.0571306	10.9469	0.457402	0.347894	2.23348	9.96904	0.217513	0.882692	0.396866
480.483	0.480483	4.80483e-07	29268.4	0.0617875	11.5806	0.544845	0.287741	2.31503	9.93115	0.187397	0.934573	0.332888
489.063	0.489063	4.89063e-07	29386.2	0.0535496	11.4685	0.545657	0.246906	2.36241	9.86035	0.222253	1.0097	0.254021
497.643	0.497643	4.97643e-07	29202.5	0.0944171	10.6875	0.495183	0.291464	2.15688	9.32609	0.321488	1.09795	0.273822
506.223	0.506223	5.06223e-07	29228	0.155335	10.125	0.587408	0.318226	1.89124	9.05374	0.320117	1.13012	0.340919
514.803	0.514803	5.14803e-07	29194.3	0.119224	10.4843	0.750909	0.255627	1.78873	8.92118	0.273071	1.02575	0.363596
523.383	0.523383	5.23383e-07	29336.7	0.0507446	11.2787	0.793507	0.178069	1.95085	8.65497	0.310669	0.952904	0.350918
531.963	0.531963	5.31963e-07	29107.1	0.0405236	11.6847	0.773824	0.146705	2.03599	9.07564	0.368337	0.967754	0.380897
540.543	0.540543	5.40543e-07	29486.3	0.0795811	11.3278	0.671457	0.186732	2.03214	9.9587	0.376906	0.967211	0.436316
549.123	0.549123	5.49123e-07	29296.4	0.130391	10.5252	0.581182	0.249241	2.16247	10.1131	0.417459	0.918399	0.453002
557.703	0.557703	5.57703e-07	29091.6	0.141262	10.3773	0.551079	0.274284	2.04445	9.81615	0.451204	0.958295	0.446175
566.283	0.566283	5.66283e-07	28926	0.0842942	10.7147	0.517415	0.274347	1.79069	10.1371	0.504829	1.03223	0.462058
574.863	0.574863	5.74863e-07	29178.6	0.0317955	10.8519	0.499537	0.310013	1.85606	10.6693	0.472727	0.978193	0.469788
583.444	0.583444	5.83444e-07	29362.8	0.0207121	10.9244	0.56064	0.35803	2.00697	10.3265	0.351619	0.774349	0.372754
592.024	0.592024	5.92024e-07	29099	0.0465894	10.873	0.690637	0.330596	1.94962	9.54418	0.273702	0.586515	0.271908
600.604	0.600604	6.00604e-07	29434.6	0.0779834	10.8118	0.731081	0.26866	1.95785	9.62216	0.256824	0.629059	0.239542
609.184	0.609184	6.09184e-07	29346.2	0.0790518	10.7492	0.676094	0.210918	2.15445	10.3823	0.239202	0.781444	0.251584
617.764	0.617764	6.17764e-07	29494	0.0780026	10.1873	0.597482	0.142591	2.37928	10.5648	0.184273	0.842431	0.275121
626.344	0.626344	6.26344e-07	29521.3	0.0638713	9.40199	0.610558	0.118563	2.45315	9.99714	0.152831	0.802487	0.286336
634.924	0.634924	6.34924e-07	29602.3	0.0502223	9.43991	0.731672	0.15685	2.31651	9.58783	0.182326	0.826328	0.271298
643.504	0.643504	6.43504e-07	29591.6	0.0710012	10.0607	0.831495	0.246694	2.08526	9.51721	0.225675	1.04158	0.261655
652.084	0.652084	6.52084e-07	29340.5	0.0903155	10.4315	0.882438	0.273912	2.09434	9.31446	0.251213	1.30058	0.222386
660.664	0.660664	6.60664e-07	29335.4	0.0750407	10.6897	0.843806	0.209883	2.36151	9.23783	0.251778	1.28124	0.177398
669.244	0.669244	6.69244e-07	29457.6	0.0686114	11.0457	0.667103	0.153507	2.39542	9.41854	0.258262	1.05173	0.259716
677.824	0.677824	6.77824e-07	29512.8	0.0914386	11.3425	0.535242	0.202482	2.39633	8.9918	0.252341	0.802077	0.424822
686.404	0.686404	6.86404e-07	29411.5	0.104227	11.348	0.568031	0.289312	2.41926	8.37735	0.221971	0.764064	0.493697
694.984	0.694984	6.94984e-07	29469.4	0.101306	10.8975	0.705111	0.240111	2.21606	8.55604	0.226547	0.924937	0.409255
703.564	0.703564	7.03564e-07	29621.2	0.0994945	10.2602	0.715336	0.150721	2.01133	9.20671	0.249661	1.04241	0.28437
712.144	0.712144	7.12144e-07	29335.1	0.125763	9.79665	0.703864	0.12099	1.96446	9.38499	0.287409	1.11034	0.317579
720.724	0.720724	7.20724e-07	29212.8	0.137472	10.3629	0.833862	0.124116	2.054	9.01908	0.306241	1.151	0.477103
729.304	0.729304	7.29304e-07	29429.9	0.111729	11.3987	0.827936	0.131709	2.09872	9.03862	0.233982	1.1573	0.566562
737.884	0.737884	7.37884e-07	29191.8	0.0730853	11.3179	0.673438	0.139465	2.0652	9.39092	0.197292	0.986638	0.548195
746.465	0.746465	7.46465e-07	29171.2	0.0797771	10.7274	0.53556	0.142832	1.96668	9.75924	0.298628	0.809632	0.467627
755.045	0.755045	7.55045e-07	29522.2	0.106032	10.5766	0.485513	0.131142	1.93856	9.7961	0.387166	0.88641	0.34245
763.625	0.763625	7.63625e-07	29372.9	0.0858263	10.7906	0.524806	0.142097	2.12216	9.57164	0.338083	1.02208	0.292752
772.205	0.772205	7.72205e-07	29234.2	0.0648367	11.4159	0.551379	0.173032	2.20385	9.4386	0.259367	1.01141	0.395589
780.785	0.780785	7.80785e-07	29460.1	0.102936	11.9587	0.641681	0.246946	2.09264	9.20831	0.257684	0.919042	0.511177
789.365	0.789365	7.89365e-07	29254.5	0.140709	12.0815	0.749919	0.262012	1.96383	9.33396	0.27837	0.898845	0.544665
797.945	0.797945	7.97945e-07	29296.1	0.116299	11.5872	0.651399	0.191707	1.8808	9.8018	0.237023	0.916589	0.498974
806.525	0.806525	8.06525e-07	29257	0.0856519	10.8191	0.568151	0.164356	1.88341	9.44441	0.172865	0.97444	0.446026
815.105	0.815105	8.15105e-07	29331.2	0.097767	10.5693	0.664238	0.175796	1.81905	8.83293	0.164154	1.10494	0.33402
823.685	0.823685	8.23685e-07	29412.9	0.119194	10.7669	0.717792	0.207734	1.79244	9.03213	0.192762	1.08045	0.216762
832.265	0.832265	8.32265e-07	29293.8	0.0918722	10.6759	0.65015	0.215079	1.81459	9.63811	0.198398	0.920382	0.20415
840.845	0.840845	8.40845e-07	29369.5	0.0878295	10.4045	0.616752	0.188829	1.75163	9.80275	0.224124	0.852281	0.205111
849.425	0.849425	8.49425e-07	29697.7	0.116117	10.6217	0.630335	0.162778	1.81374	9.80705	0.261604	0.863292	0.165211
858.005	0.858005	8.58005e-07	29343.8	0.108913	10.8977	0.609977	0.163107	2.02137	10.0029	0.227289	0.80592	0.19552
866.585	0.866585	8.66585e-07	29445.8	0.0617901	10.935	0.58458	0.189848	2.04641	10.0368	0.210074	0.759322	0.265399
875.165	0.875165	8.75165e-07	29568	0.0229596	11.4862	0.519311	0.252222	1.87477	10.0422	0.312837	0.896107	0.22993
883.745	0.883745	8.83745e-07	29478.3	0.0122054	12.0145	0.450101	0.319627	1.79555	9.9139	0.464263	1.02856	0.190203
892.325	0.892325	8.92325e-07	29443.1	0.0153231	11.7352	0.474244	0.303795	1.83588	9.92419	0.541278	1.04533	0.155291
900.905	0.900905	9.00905e-07	29153.2	0.0380723	11.2901	0.624237	0.25387	2.01373	10.2755	0.427539	1.01405	0.149475
909.485	0.909485	9.09485e-07	29685.6	0.10406	11.1385	0.738723	0.22466	2.19051	10.5092	0.267975	0.850613	0.253565
918.066	0.918066	9.18066e-07	29378.6	0.14934	11.1011	0.671799	0.200799	2.20045	10.4443	0.204858	0.735952	0.354311
926.646	0.926646	9.26646e-07	29528.1	0.105358	11.2581	0.533488	0.18927	2.36812	10.1848	0.175819	0.81889	0.345973
935.226	0.935226	9.35226e-07	29369	0.0557629	11.4133	0.463468	0.159039	2.49497	9.9288	0.187528	1.0661	0.387672
943.806	0.943806	9.43806e-07	29381.8	0.0277738	11.5747	0.478032	0.12865	2.41567	10.091	0.269746	1.21752	0.489777
952.386	0.952386	9.52386e-07	29463.5	0.0188423	11.7563	0.557027	0.153477	2.28466	10.1681	0.324853	1.13736	0.413729
960.966	0.960966	9.60966e-07	29590.8	0.0484587	11.8836	0.559124	0.200482	2.08357	9.65098	0.337147	0.880858	0.232499
969.546	0.969546	9.69546e-07	29363.3	0.0915833	11.7251	0.542895	0.243632	1.8926	9.0555	0.317797	0.612131	0.212618
978.126	0.978126	9.78126e-07	29428.7	0.0969155	11.0947	0.532679	0.241872	1.77084	8.8649	0.263563	0.517078	0.363448
986.706	0.986706	9.86706e-07	28997.1	0.0908998	10.5495	0.513846	0.193271	1.7196	9.35934	0.252544	0.601413	0.526724
995.286	0.995286	9.95286e-07	29466.1	0.100335	10.3	0.59846	0.166732	1.54066	10.1775	0.255317	0.774199	0.598786
1003.87	1.00387	1.00387e-06	29461	0.0935664	10.4418	0.7621	0.200364	1.35289	10.4534	0.280465	0.822983	0.456747
1012.45	1.01245	1.01245e-06	29556.7	0.063899	10.83	0.757035	0.189212	1.50516	10.1161	0.338463	0.801542	0.264277
1021.03	1.02103	1.02103e-06	29325.1	0.0506231	11.0987	0.561067	0.125595	1.88257	9.89624	0.343204	0.848293	0.244326
1029.61	1.02961	1.02961e-06	29294	0.0550686	11.1245	0.515773	0.124277	2.05248	10.2235	0.333413	0.939536	0.315293
1038.19	1.03819	1.03819e-06	29624.8	0.0526916	10.8299	0.637202	0.17159	2.00938	10.4389	0.327191	1.10317	0.330966
1046.77	1.04677	1.04677e-06	29388	0.0521572	10.3718	0.684375	0.184947	1.95521	9.97289	0.324483	1.16636	0.388323
1055.35	1.05535	1.05535e-06	29393.3	0.0558492	10.4093	0.709843	0.164718	2.12536	9.28768	0.331654	1.18548	0.479551
1063.93	1.06393	1.06393e-06	29483.3	0.033728	11.0909	0.777812	0.162816	2.30949	8.89682	0.281047	1.29162	0.522258
1072.51	1.07251	1.07251e-06	29386.4	0.011371	11.5961	0.860836	0.144034	2.47056	8.82011	0.204215	1.33772	0.532231
1081.09	1.08109	1.08109e-06	29523.4	0.00506949	12.0735	0.86772	0.144943	2.66109	8.6961	0.150206	1.20346	0.424735
1089.67	1.08967	1.08967e-06	29050.4	0.00755861	12.4719	0.727171	0.157588	2.65707	8.65013	0.141937	1.00359	0.256146
1098.25	1.09825	1.09825e-06	29432	0.0134986	12.41	0.549748	0.154354	2.44219	9.07334	0.154232	0.798515	0.196136
1106.83	1.10683	1.10683e-06	29323.4	0.0172866	11.7523	0.480714	0.183483	2.18736	9.272	0.222139	0.701606	0.211466
1115.41	1.11541	1.11541e-06	29247.2	0.034431	10.9362	0.535781	0.233493	2.21196	9.17607	0.30931	0.732711	0.258591
1123.99	1.12399	1.12399e-06	29391.8	0.0802373	10.5575	0.681188	0.246739	2.28397	9.11341	0.306768	0.734836	0.418568
1132.57	1.13257	1.13257e-06	29484.5	0.128032	10.6568	0.888644	0.260779	1.91089	8.99989	0.238316	0.679818	0.518481
1141.15	1.14115	1.14115e-06	29212.9	0.130535	11.1419	0.953407	0.26563	1.70389	9.3503	0.197075	0.766566	0.407387
1149.73	1.14973	1.14973e-06	29549.3	0.0969348	11.5112	0.777853	0.196278	1.97048	9.92544	0.218412	0.908864	0.275423
1158.31	1.15831	1.15831e-06	29514	0.0904609	11.7068	0.592155	0.127233	2.09362	9.93288	0.269941	0.932611	0.238033
1166.89	1.16689	1.16689e-06	29420.5	0.080738	11.9062	0.600529	0.11927	2.00154	9.93577	0.260002	0.942242	0.242423
1175.47	1.17547	1.17547e-06	29494.4	0.0504452	11.6161	0.670338	0.155349	1.90865	10.0814	0.22006	1.02197	0.301635
1184.05	1.18405	1.18405e-06	29447.4	0.0418674	10.6862	0.739536	0.217959	1.89882	10.3464	0.17306	1.07312	0.395638
1192.63	1.19263	1.19263e-06	29512.5	0.0649519	9.98493	0.859745	0.292378	1.96322	10.3925	0.132793	0.983509	0.355242
1201.21	1.20121	1.20121e-06	29195.9	0.0852067	10.0861	0.97779	0.354395	1.82615	10.3034	0.154848	0.799172	0.260566
1209.79	1.20979	1.20979e-06	29514.3	0.0510366	10.6323	0.932432	0.38862	1.6857	10.4149	0.209063	0.649197	0.24037
1218.37	1.21837	1.21837e-06	29176.2	0.0222505	11.0475	0.781902	0.368773	1.7781	10.3172	0.255455	0.69698	0.23316
1226.95	1.22695	1.22695e-06	28992.8	0.0533346	10.9086	0.720436	0.295527	1.88593	9.78288	0.326342	0.795021	0.232953
1235.53	1.23553	1.23553e-06	29119.9	0.112464	10.7401	0.662522	0.239658	1.93928	9.3479	0.327508	0.695763	0.270847
1244.11	1.24411	1.24411e-06	29255.1	0.121183	10.7518	0.498999	0.247026	2.07051	9.29953	0.233313	0.647068	0.307691
1252.69	1.25269	1.25269e-06	29671.4	0.0965461	10.9204	0.436666	0.216374	2.33001	9.71178	0.141892	0.771297	0.303564
1261.27	1.26127	1.26127e-06	29230.1	0.105369	11.0657	0.524394	0.146334	2.37645	10.351	0.116695	0.853679	0.314994
1269.85	1.26985	1.26985e-06	29608.1	0.0977495	10.9755	0.665162	0.140599	2.25854	10.6701	0.121635	0.781644	0.325651
1278.43	1.27843	1.27843e-06	29463.6	0.0511937	11.0312	0.676222	0.185048	2.25371	10.5069	0.180686	0.626088	0.283863
1287.01	1.28701	1.28701e-06	29396.2	0.0296291	11.6421	0.564086	0.188306	2.34316	10.2882	0.270881	0.566328	0.261609
1295.59	1.29559	1.29559e-06	29383.6	0.070231	12.4113	0.494742	0.198353	2.35256	9.91496	0.273412	0.672991	0.318603
1304.17	1.30417	1.30417e-06	29450.7	0.131705	12.5461	0.478327	0.27977	2.1734	9.41047	0.239089	0.832108	0.364299
1312.75	1.31275	1.31275e-06	29560	0.131656	11.793	0.503829	0.363253	2.04766	9.35976	0.183685	0.936324	0.421092
1321.33	1.32133	1.32133e-06	29312.7	0.0816578	11.2687	0.539741	0.338068	2.00281	9.77862	0.153066	0.892872	0.470353
1329.91	1.32991	1.32991e-06	29435	0.0393224	11.1702	0.532885	0.313916	1.86518	10.001	0.197588	0.819121	0.534631
1338.49	1.33849	1.33849e-06	29892.3	0.0487925	10.9886	0.503381	0.348853	1.9264	10.0363	0.256755	0.833131	0.517127
1347.07	1.34707	1.34707e-06	29494.7	0.0850207	10.9209	0.446339	0.341713	1.96969	9.99623	0.252115	0.886785	0.406172
1355.65	1.35565	1.35565e-06	29486.4	0.0912727	10.9256	0.416109	0.289123	1.84439	9.82794	0.258096	0.895944	0.465396
1364.23	1.36423	1.36423e-06	29544.2	0.1066	10.5492	0.44609	0.219679	1.80383	9.82588	0.28838	0.82615	0.55675
1372.81	1.37281	1.37281e-06	29334.2	0.1215	10.2128	0.485907	0.143976	1.94597	10.1892	0.271732	0.788717	0.420604
1381.39	1.38139	1.38139e-06	29399.1	0.0722501	10.4376	0.509636	0.12236	2.20931	10.479	0.28757	0.824179	0.345635
1389.97	1.38997	1.38997e-06	29473.3	0.0296254	10.4683	0.526659	0.136882	2.41303	10.353	0.340008	0.868488	0.424607
1398.55	1.39855	1.39855e-06	29417.5	0.0449307	9.93231	0.576042	0.123481	2.47814	10.2468	0.304578	0.850896	0.422179
1407.13	1.40713	1.40713e-06	29198.3	0.102587	10.038	0.607201	0.146036	2.58187	10.0978	0.222877	0.733924	0.429087
1415.71	1.41571	1.41571e-06	29333.3	0.148849	10.5304	0.616088	0.196952	2.53232	9.75158	0.191576	0.562767	0.459154
1424.29	1.42429	1.42429e-06	29493.5	0.128801	10.7211	0.645628	0.160287	2.26529	9.33848	0.253128	0.554167	0.377607
1432.87	1.43287	1.43287e-06	29136	0.102118	10.8526	0.616468	0.0936353	2.20217	9.41307	0.384443	0.816508	0.272218
1441.45	1.44145	1.44145e-06	29539.2	0.106388	10.8301	0.514492	0.081478	2.26752	9.89219	0.463545	1.11185	0.30199
1450.03	1.45003	1.45003e-06	29518.5	0.1202	10.7683	0.431413	0.105865	2.18689	10.2909	0.346248	1.18545	0.426979
1458.61	1.45861	1.45861e-06	29612	0.139416	10.9464	0.508989	0.144761	2.1288	9.95179	0.205107	1.0042	0.442258
1467.19	1.46719	1.46719e-06	29425.3	0.135544	11.3196	0.607359	0.180984	2.19028	9.51377	0.176515	0.72113	0.320449
1475.77	1.47577	1.47577e-06	29364.2	0.122856	11.381	0.523115	0.177087	2.22809	9.61998	0.220219	0.704066	0.222732
1484.35	1.48435	1.48435e-06	29470.5	0.131253	11.0715	0.395923	0.14362	1.96327	9.88434	0.232978	0.930265	0.27505
1492.93	1.49293	1.49293e-06	29693.2	0.0982558	10.7355	0.417712	0.173076	1.6541	9.8371	0.177914	0.953797	0.350376
1501.51	1.50151	1.50151e-06	29665.8	0.0655218	10.56	0.483264	0.231048	1.7046	9.40081	0.167693	0.680308	0.320677
1510.09	1.51009	1.51009e-06	29469.3	0.109919	10.3558	0.468792	0.183256	1.88859	9.29421	0.179925	0.545546	0.244009
1518.67	1.51867	1.51867e-06	29552.2	0.158496	10.1117	0.456714	0.117338	2.10652	9.83481	0.157649	0.828403	0.195427
1527.25	1.52725	1.52725e-06	29446.1	0.112626	10.0356	0.487485	0.130433	2.39043	10.0317	0.148836	1.17401	0.189406
1535.83	1.53583	1.53583e-06	29321.2	0.0629088	10.0738	0.543047	0.152914	2.34469	9.38366	0.187751	1.10254	0.24363
1544.41	1.54441	1.54441e-06	29615.3	0.0579747	10.1264	0.593234	0.140082	2.15335	8.61878	0.209103	0.842235	0.320223
1552.99	1.55299	1.55299e-06	29448.4	0.0880914	10.7853	0.616177	0.127859	2.27961	8.629	0.22509	0.751737	0.417638
1561.57	1.56157	1.56157e-06	29288.6	0.132892	11.1379	0.674728	0.153727	2.58044	9.23651	0.249549	0.852077	0.490359
1570.15	1.57015	1.57015e-06	29702.8	0.154391	11.0414	0.717545	0.164424	2.78969	9.6796	0.290012	0.950037	0.544619
1578.73	1.57873	1.57873e-06	29618.1	0.116256	11.3111	0.745709	0.187754	2.78172	9.81161	0.340728	1.02631	0.539095
1587.31	1.58731	1.58731e-06	29678	0.0991917	11.5112	0.751642	0.271632	2.53677	9.7427	0.335998	1.1646	0.499093
1595.89	1.59589	1.59589e-06	29476.4	0.140077	11.3033	0.622964	0.318836	2.25027	9.2933	0.344526	1.16141	0.495015
1604.47	1.60447	1.60447e-06	29261.3	0.156681	11.0025	0.525465	0.313736	2.30642	9.40276	0.408509	0.980307	0.469664
1613.05	1.61305	1.61305e-06	29353.8	0.122751	10.8128	0.531802	0.31486	2.48149	9.85842	0.414683	0.91587	0.428326
1621.63	1.62163	1.62163e-06	29182.5	0.0717785	11.1697	0.56016	0.281572	2.39896	10.1628	0.374513	0.936318	0.379337
1630.21	1.63021	1.63021e-06	29632.3	0.041986	11.6655	0.525954	0.226284	2.13818	10.361	0.28751	1.02821	0.281397
1638.79	1.63879	1.63879e-06	29662.8	0.0492747	11.4051	0.527007	0.155333	1.95481	10.2855	0.223592	1.0695	0.276661
1647.37	1.64737	1.64737e-06	29594.2	0.0673604	10.9157	0.539296	0.12039	1.82218	9.94574	0.256423	0.994536	0.313356
1655.95	1.65595	1.65595e-06	29374.7	0.0617677	10.7607	0.440105	0.194017	1.87446	9.50782	0.283085	0.978895	0.266987
1664.53	1.66453	1.66453e-06	29391.7	0.0954835	10.7016	0.390548	0.277703	2.05675	9.36217	0.238655	0.977099	0.280614
1673.11	1.67311	1.67311e-06	29425.3	0.165305	10.815	0.495263	0.276524	2.13698	9.24182	0.184894	0.948683	0.37617
1681.69	1.68169	1.68169e-06	29397.7	0.189347	10.8287	0.642716	0.24332	2.00335	8.84493	0.159183	0.94808	0.423238
1690.27	1.69027	1.69027e-06	29627.9	0.189135	10.5924	0.748363	0.162734	1.82851	8.81838	0.154709	1.01901	0.391553
1698.85	1.69885	1.69885e-06	29581.5	0.164526	10.5645	0.791508	0.117949	1.91694	9.14672	0.18764	0.951449	0.376401
1707.43	1.70743	1.70743e-06	29333.7	0.122079	10.8771	0.79171	0.148775	2.15032	9.42189	0.247081	0.79534	0.360069
1716.01	1.71601	1.71601e-06	29689.6	0.0868636	11.4017	0.819433	0.174207	2.12706	9.43271	0.278293	0.772592	0.321227
1724.59	1.72459	1.72459e-06	29341.2	0.0837169	12.0309	0.811084	0.171948	1.93271	9.28435	0.27226	0.843267	0.218667
1733.17	1.73317	1.73317e-06	29100.6	0.10003	11.9618	0.709006	0.143497	1.88881	9.61423	0.188548	1.01488	0.153336
1741.75	1.74175	1.74175e-06	29429.5	0.153013	10.9835	0.671981	0.118153	1.97169	10.155	0.123554	1.14343	0.146449
1750.33	1.75033	1.75033e-06	29529	0.216475	10.4436	0.736411	0.0968092	1.9721	9.96896	0.135061	1.07851	0.182536
1758.91	1.75891	1.75891e-06	29553.1	0.173248	10.7046	0.732515	0.0903514	1.75456	9.56262	0.154223	0.94345	0.280257
1767.49	1.76749	1.76749e-06	29439.7	0.101046	11.083	0.596545	0.0977555	1.67133	9.54269	0.178054	0.894693	0.376207
1776.07	1.77607	1.77607e-06	29624.8	0.0563286	11.4643	0.512908	0.119233	1.94325	10.0609	0.209724	0.823169	0.339886
1784.65	1.78465	1.78465e-06	29502.1	0.0213959	11.5518	0.563389	0.149256	2.20325	10.5318	0.263903	0.6453	0.281825
1793.23	1.79323	1.79323e-06	29702.5	0.00498848	11.0657	0.629196	0.20612	2.1766	10.3609	0.308388	0.599387	0.339257
1801.81	1.80181	1.80181e-06	29202.1	0.00475984	10.7898	0.617031	0.239669	2.07899	10.6514	0.311531	0.71716	0.406194
1810.39	1.81039	1.81039e-06	29393.3	0.0117845	11.0007	0.567524	0.191379	2.1102	11.6366	0.365695	0.911548	0.395743
1818.97	1.81897	1.81897e-06	29556.1	0.0296685	11.1999	0.562081	0.151638	2.11875	11.8319	0.460934	1.19337	0.346941
1827.55	1.82755	1.82755e-06	29557	0.0550586	11.2341	0.536733	0.196608	1.9989	11.1769	0.433291	1.36505	0.28061
1836.13	1.83613	1.83613e-06	29612.9	0.0662838	10.8543	0.521264	0.313666	2.01501	11.0538	0.317991	1.324	0.223076
1844.71	1.84471	1.84471e-06	29783.8	0.090997	10.6221	0.57361	0.344093	2.2217	11.0009	0.218756	1.08359	0.176541
1853.29	1.85329	1.85329e-06	29320.2	0.136074	10.8977	0.571925	0.242075	2.27812	10.3679	0.138583	0.862781	0.167365
1861.87	1.86187	1.86187e-06	29188.4	0.154449	10.9949	0.527984	0.128087	2.18878	9.80537	0.154977	0.796529	0.182887
1870.45	1.87045	1.87045e-06	29279.5	0.174316	10.9638	0.514167	0.0656215	2.10698	9.80224	0.289142	0.789551	0.23717
1879.03	1.87903	1.87903e-06	29382.4	0.174037	11.1232	0.57747	0.0830962	2.04968	9.97937	0.366414	0.7917	0.31792
1887.61	1.88761	1.88761e-06	29454.6	0.124584	11.1523	0.666619	0.171184	1.91856	10.3396	0.286245	0.867107	0.354352
1896.19	1.89619	1.89619e-06	29537	0.0665656	10.8791	0.611643	0.248154	1.84553	10.6246	0.237633	0.866349	0.379456
1904.77	1.90477	1.90477e-06	29313.6	0.041058	10.6632	0.538297	0.282709	1.9698	10.3744	0.238208	0.752614	0.363952
1913.35	1.91335	1.91335e-06	29432.4	0.0266071	11.0849	0.539894	0.344679	2.04167	10.4399	0.205124	0.757892	0.314425
1921.93	1.92193	1.92193e-06	29511.8	0.0206939	11.9308	0.537495	0.463551	1.79997	10.6767	0.197797	0.823818	0.284161
1930.51	1.93051	1.93051e-06	29426.4	0.0279994	12.1051	0.588696	0.530915	1.63753	10.3389	0.296159	0.867113	0.271045
1939.09	1.93909	1.93909e-06	29649.2	0.0361058	11.4437	0.614922	0.448323	1.79782	10.2274	0.421428	0.832004	0.256107
1947.67	1.94767	1.94767e-06	29747	0.0499442	10.8643	0.534726	0.327821	1.95107	10.4656	0.435617	0.887431	0.273518
1956.25	1.95625	1.95625e-06	29529.4	0.0784852	10.9847	0.495186	0.239764	2.03575	10.5377	0.416578	1.01849	0.308514
1964.83	1.96483	1.96483e-06	29558.4	0.116094	11.3731	0.513868	0.198221	2.10072	10.3015	0.363221	0.930403	0.30906
1973.41	1.97341	1.97341e-06	29501.6	0.160483	11.6019	0.572014	0.156228	1.99111	9.9245	0.225417	0.692202	0.306341
1981.99	1.98199	1.98199e-06	29278.7	0.180856	11.337	0.608951	0.149636	1.90713	9.91146	0.15509	0.655941	0.296068
1990.57	1.99057	1.99057e-06	29435.9	0.153666	10.8134	0.590945	0.20178	2.17525	10.0913	0.192556	0.855444	0.284257
1999.15	1.99915	1.99915e-06	29285.5	0.10012	10.7352	0.565721	0.255193	2.59244	10.1328	0.226071	0.988815	0.352642
2007.73	2.00773	2.00773e-06	29362.9	0.0511846	11.3215	0.558168	0.308617	2.70024	10.2825	0.219237	0.923793	0.494745
2016.31	2.01631	2.01631e-06	29339.3	0.0397508	11.948	0.541651	0.331596	2.51781	10.039	0.260854	0.843581	0.53772
2024.89	2.02489	2.02489e-06	29498.8	0.0447483	11.3552	0.517105	0.297183	2.24589	9.67838	0.302965	0.841544	0.396553
2033.47	2.03347	2.03347e-06	29421.2	0.0304497	10.3196	0.417902	0.238082	1.98738	9.60405	0.271806	0.826125	0.234319
2042.05	2.04205	2.04205e-06	29382.2	0.0160704	10.3679	0.287295	0.179011	1.72202	9.72921	0.281925	0.821324	0.158574
2050.63	2.05063	2.05063e-06	29554.1	0.0102432	10.8185	0.347412	0.123328	1.60472	9.63748	0.312046	0.868096	0.131783
2059.21	2.05921	2.05921e-06	29482.5	0.0233514	10.8535	0.563577	0.0814964	1.73762	9.38723	0.313128	0.964348	0.167136
2067.79	2.06779	2.06779e-06	29225.5	0.0709355	10.8154	0.61847	0.0663469	1.73863	9.70463	0.249777	0.971544	0.191673
2076.37	2.07637	2.07637e-06	29254.7	0.113168	11.0194	0.562703	0.0495532	1.69552	10.3259	0.184179	0.876448	0.170989
2084.95	2.08495	2.08495e-06	29177.8	0.10142	11.4502	0.562835	0.0360525	2.08748	10.2449	0.189129	0.754868	0.166227
2093.53	2.09353	2.09353e-06	29563.4	0.0812002	11.5092	0.533944	0.0385612	2.46173	9.73146	0.217318	0.691872	0.155669
2102.11	2.10211	2.10211e-06	29445.7	0.0749878	11.0708	0.555313	0.078781	2.39058	9.62998	0.195841	0.879515	0.196999
2110.69	2.11069	2.11069e-06	29457.9	0.0594312	10.659	0.587369	0.136741	2.20539	9.76708	0.163758	1.00242	0.313781
2119.27	2.11927	2.11927e-06	29370.3	0.0497062	11.1849	0.546037	0.151371	2.04781	9.62058	0.12884	0.819356	0.393134
2127.85	2.12785	2.12785e-06	29534.9	0.0511178	11.6359	0.453624	0.166687	1.94756	9.4911	0.144344	0.825235	0.387538
2136.43	2.13643	2.13643e-06	29684.6	0.0456514	11.0928	0.431249	0.210681	2.06094	9.57703	0.18559	1.12213	0.33308
2145.01	2.14501	2.14501e-06	29409.9	0.0705187	11.0931	0.490928	0.209589	1.97021	9.5439	0.183166	1.12791	0.293957
2153.59	2.15359	2.15359e-06	29371.1	0.127089	11.5331	0.621284	0.257713	1.7809	9.37028	0.153866	0.870961	0.323484
2162.17	2.16217	2.16217e-06	29438.2	0.15724	11.327	0.776903	0.344138	1.89587	9.84422	0.181052	0.804728	0.4134
2170.75	2.17075	2.17075e-06	29773.2	0.138708	10.5777	0.759075	0.31596	2.0621	10.5389	0.264887	0.924835	0.472496
2179.33	2.17933	2.17933e-06	29442.6	0.0903524	10.1282	0.623042	0.230426	2.1407	10.4057	0.313799	1.01057	0.456344
2187.91	2.18791	2.18791e-06	29745	0.0383095	10.4434	0.526694	0.15092	2.36223	10.0812	0.272505	1.03184	0.344666
2196.49	2.19649	2.19649e-06	29551.8	0.0160874	11.1638	0.424884	0.0861409	2.59414	9.91654	0.170096	0.900572	0.207283
2205.07	2.20507	2.20507e-06	29500.9	0.0376887	11.2176	0.418628	0.0599442	2.43378	9.77279	0.123084	0.800723	0.164968
2213.65	2.21365	2.21365e-06	29403.5	0.0779303	11.0625	0.47541	0.0874431	2.22342	9.69865	0.130312	0.849767	0.20512
2222.23	2.22223	2.22223e-06	29494.5	0.0921267	11.4337	0.491473	0.128553	2.23636	9.82887	0.133802	0.904311	0.281079
2230.81	2.23081	2.23081e-06	29574.2	0.0878023	11.46	0.538791	0.172912	2.1907	10.0499	0.137777	1.02774	0.301567
2239.39	2.23939	2.23939e-06	29409.1	0.0994579	11.1014	0.600926	0.255365	2.18439	10.2605	0.181423	1.11986	0.251744
2247.97	2.24797	2.24797e-06	29331.7	0.129078	11.1492	0.648426	0.269662	2.10972	10.4382	0.224432	1.04546	0.257367
2256.55	2.25655	2.25655e-06	29568	0.138394	11.2899	0.700563	0.208062	2.09266	10.3783	0.183333	0.902995	0.276971
2265.13	2.26513	2.26513e-06	29547.9	0.119255	11.1088	0.628065	0.179264	2.18984	10.3883	0.201162	0.882514	0.233014
2273.71	2.27371	2.27371e-06	29359.4	0.0609232	10.9875	0.539074	0.190717	2.22956	10.1751	0.294998	0.936391	0.170669
2282.29	2.28229	2.28229e-06	29306.5	0.0155711	11.1962	0.542533	0.212157	2.2401	9.91696	0.361234	0.878281	0.119028
2290.87	2.29087	2.29087e-06	29380.8	0.00469123	11.1601	0.625744	0.200521	2.56465	9.79542	0.372524	0.810702	0.0969832
2299.45	2.29945	2.29945e-06	29180.9	0.00900624	10.8331	0.712083	0.162054	2.69237	9.73332	0.306371	0.759734	0.199903
2308.03	2.30803	2.30803e-06	29352.2	0.021174	10.4928	0.696977	0.10513	2.3882	9.69999	0.231917	0.702584	0.360286
2316.61	2.31661	2.31661e-06	29242.4	0.0414531	10.655	0.649983	0.0688162	2.11382	9.59249	0.217191	0.702726	0.37346
2325.19	2.32519	2.32519e-06	29360.4	0.0591233	11.2862	0.626568	0.0796849	1.92231	9.53591	0.234335	0.797238	0.394647
2333.77	2.33377	2.33377e-06	29547.6	0.0678092	11.4545	0.637908	0.14301	1.75927	9.50777	0.205696	0.970474	0.518089
2342.35	2.34235	2.34235e-06	29065.2	0.0941845	11.2086	0.543795	0.216143	1.6345	9.76901	0.180536	1.05088	0.526846
2350.93	2.35093	2.35093e-06	29282.3	0.101133	11.28	0.411289	0.190885	1.62768	9.90117	0.156893	1.092	0.430482
2359.51	2.35951	2.35951e-06	29207.5	0.0862193	11.5174	0.47391	0.156962	1.82179	9.67853	0.111665	1.12478	0.385416
2368.09	2.36809	2.36809e-06	29509.8	0.113543	11.6378	0.577134	0.181616	1.908	9.42601	0.128367	1.0107	0.390692
2376.67	2.37667	2.37667e-06	29331.2	0.14261	11.5124	0.512298	0.195822	1.86559	9.08991	0.205265	0.882838	0.379125
2385.25	2.38525	2.38525e-06	29475.9	0.125364	11.4969	0.410373	0.183953	1.84439	8.35338	0.298496	0.793806	0.35854
2393.83	2.39383	2.39383e-06	29432.2	0.105933	11.7674	0.37149	0.180402	1.72933	8.12475	0.401287	0.799145	0.41066
2402.41	2.40241	2.40241e-06	29198.8	0.092248	11.9787	0.436218	0.17009	1.64815	9.09069	0.401561	1.01445	0.425827
2410.99	2.41099	2.41099e-06	29396.9	0.0744478	11.6252	0.543242	0.154265	1.88107	10.1305	0.266674	1.14291	0.408135
2419.57	2.41957	2.41957e-06	29297.3	0.0469854	11.4807	0.554648	0.134135	2.1011	9.89524	0.169536	0.989252	0.404949
2428.15	2.42815	2.42815e-06	29031	0.0185443	11.7572	0.47668	0.118682	1.92981	8.92538	0.202707	0.816136	0.376132
2436.73	2.43673	2.43673e-06	29355.4	0.00503228	11.6676	0.390585	0.115836	1.86356	8.67167	0.276983	0.840147	0.440797
2445.32	2.44531	2.44531e-06	29084	0.00801529	11.1625	0.337457	0.114226	2.13623	8.94505	0.288126	0.991511	0.489912
2453.89	2.4539	2.45389e-06	29342.1	0.0333562	10.5304	0.3372	0.169224	2.34044	9.05727	0.242548	1.08503	0.40155
2462.47	2.46247	2.46248e-06	29215.3	0.066635	10.3058	0.388944	0.279443	2.39304	9.0285	0.215647	0.949992	0.266135
2471.06	2.47106	2.47106e-06	29096.4	0.0726536	10.7976	0.449703	0.323857	2.49434	8.97752	0.264078	0.740797	0.202674
2479.63	2.47964	2.47963e-06	29574	0.0594613	11.1371	0.468801	0.299856	2.63961	9.02051	0.294947	0.74257	0.239035
2488.22	2.48821	2.48821e-06	29398.7	0.0403782	11.394	0.543889	0.235401	2.47105	9.51403	0.217596	0.890453	0.330698
2496.8	2.4968	2.4968e-06	29186	0.0341063	11.8007	0.691186	0.224208	2.18575	9.99896	0.157926	1.0015	0.410091
2505.38	2.50538	2.50538e-06	29216.3	0.0457686	12.0481	0.752803	0.251382	2.18473	10.1904	0.166488	1.09023	0.353551
2513.95	2.51395	2.51395e-06	29230.6	0.0505172	11.7345	0.729895	0.238183	2.24472	10.2392	0.156511	1.02833	0.304306
2522.53	2.52253	2.52253e-06	29362.7	0.0455676	11.2991	0.784154	0.213309	2.13018	10.0321	0.141541	0.80912	0.401712
2531.11	2.53111	2.53111e-06	29317.8	0.0562961	11.5424	0.781361	0.210128	2.07293	9.91651	0.163555	0.692612	0.527477
2539.7	2.5397	2.5397e-06	29314.1	0.0665132	11.6439	0.657821	0.186712	2.08013	9.92442	0.16441	0.679521	0.463335
2548.28	2.54828	2.54828e-06	29244.4	0.0564751	11.034	0.514488	0.159482	2.0887	9.77098	0.162216	0.775356	0.32569
2556.86	2.55685	2.55685e-06	29012.7	0.0488341	10.5494	0.471791	0.148238	2.04104	9.91094	0.219589	0.959076	0.310088
2565.43	2.56543	2.56543e-06	29085.9	0.0555959	10.9127	0.395694	0.146378	1.83409	10.1961	0.286108	1.08494	0.400831
2574.01	2.57402	2.57402e-06	29193.3	0.0658926	11.3274	0.328702	0.245321	1.76737	10.1021	0.267369	1.17013	0.471605
2582.6	2.58259	2.5826e-06	28969.9	0.0865099	11.3585	0.338125	0.372406	1.91113	9.82439	0.153478	1.08948	0.387972
2591.17	2.59117	2.59117e-06	29266.4	0.109968	11.2257	0.43856	0.322118	2.10301	9.68991	0.100401	0.941005	0.32038
2599.76	2.59976	2.59976e-06	29127.7	0.12563	10.7003	0.59995	0.15925	2.13318	9.7038	0.217828	0.967399	0.338146
2608.34	2.60834	2.60834e-06	29463.7	0.170223	10.4397	0.691144	0.0944763	2.0477	9.60596	0.373802	1.01235	0.353676
2616.92	2.61692	2.61692e-06	29165.2	0.24274	10.6692	0.742377	0.177057	2.02958	9.31338	0.338556	0.994537	0.365892
2625.5	2.6255	2.6255e-06	29291.9	0.276493	11.3878	0.801891	0.295119	1.99793	9.14477	0.229483	1.05309	0.350871
2634.08	2.63408	2.63408e-06	29444.8	0.299945	11.9341	0.685634	0.308775	1.88917	9.38331	0.168022	1.13364	0.324948
2642.66	2.64266	2.64266e-06	29217.1	0.294327	11.748	0.53533	0.217488	1.7217	9.47543	0.162375	0.984832	0.294489
2651.24	2.65124	2.65124e-06	29067.9	0.188455	11.6044	0.507354	0.147088	1.71521	9.17475	0.199203	0.823069	0.233067
2659.82	2.65982	2.65982e-06	29062.4	0.0784966	11.6137	0.536293	0.144599	1.85697	9.25144	0.184215	0.853598	0.177656
2668.4	2.6684	2.6684e-06	29190.7	0.0422133	11.5416	0.513053	0.152227	2.04175	9.7899	0.135076	0.911895	0.164505
2676.98	2.67698	2.67698e-06	29391.9	0.0499353	11.384	0.431295	0.166089	2.05335	10.0443	0.130269	0.808903	0.201182
2685.56	2.68556	2.68556e-06	29511.8	0.0850629	11.8532	0.432019	0.151832	1.90352	10.0048	0.166476	0.741827	0.369414
2694.14	2.69414	2.69414e-06	29357	0.13387	12.2988	0.466113	0.115979	1.90406	9.91653	0.217527	0.802903	0.537337
2702.72	2.70272	2.70272e-06	29435.2	0.159299	11.861	0.49771	0.115645	1.9389	9.73675	0.22219	0.886717	0.51587
2711.3	2.7113	2.7113e-06	29307	0.113915	11.3868	0.596498	0.18409	1.97277	9.16887	0.220619	0.794235	0.494706
2719.88	2.71988	2.71988e-06	29468.6	0.0580212	11.321	0.665716	0.224509	2.12825	8.81752	0.242773	0.662051	0.57967
2728.46	2.72846	2.72846e-06	29379.4	0.0285806	11.2294	0.613418	0.179219	2.23973	9.23157	0.262811	0.651072	0.593573
2737.04	2.73704	2.73704e-06	29432.9	0.019627	10.9814	0.545976	0.131419	2.1182	9.63801	0.301782	0.693735	0.478645
2745.62	2.74562	2.74562e-06	29359.2	0.0472576	10.6246	0.523089	0.113663	1.88404	9.08634	0.335085	0.816335	0.374167
2754.2	2.7542	2.7542e-06	29326.8	0.0860612	10.7244	0.475336	0.111251	1.78925	8.94377	0.347703	0.968683	0.335653
2762.78	2.76278	2.76278e-06	29438.2	0.0936158	10.9855	0.501297	0.131051	1.80462	9.13664	0.294484	1.11737	0.244342
2771.36	2.77136	2.77136e-06	29297.8	0.0947962	11.0777	0.605617	0.176521	1.92428	8.93335	0.240004	1.23442	0.24656
2779.94	2.77994	2.77994e-06	29194.9	0.0972222	11.1269	0.697801	0.246893	2.08036	9.10067	0.262222	1.1373	0.40996
2788.52	2.78852	2.78852e-06	29360.2	0.107259	11.1281	0.749502	0.266798	2.02744	9.91285	0.260221	0.9168	0.464482
2797.1	2.7971	2.7971e-06	29123.5	0.118622	11.2367	0.656975	0.249722	1.9531	10.2649	0.229196	0.817131	0.389219
2805.68	2.80568	2.80568e-06	29245	0.149762	11.4759	0.53677	0.219902	2.03159	9.66708	0.263404	0.892316	0.362986
2814.26	2.81426	2.81426e-06	29492.3	0.138882	11.5656	0.545639	0.19213	2.08013	9.18706	0.251169	0.963007	0.393089
2822.84	2.82284	2.82284e-06	29239.1	0.0843161	11.3862	0.57002	0.163233	2.10848	9.33146	0.195245	0.93697	0.491753
2831.42	2.83142	2.83142e-06	29230	0.0561727	11.2332	0.581078	0.13813	2.25472	9.47546	0.224971	0.875799	0.468527
2840	2.84	2.84e-06	29279.5	0.0675704	11.255	0.615518	0.128745	2.38538	9.38668	0.253592	0.895002	0.304074
2848.58	2.84858	2.84858e-06	29279.9	0.0676035	11.3493	0.638803	0.122805	2.27662	9.67104	0.189967	0.926032	0.198524
2857.16	2.85716	2.85716e-06	29184.5	0.0408042	11.0639	0.676705	0.178556	2.25879	10.3747	0.0975873	1.01084	0.203286
2865.74	2.86574	2.86574e-06	29510.2	0.0358363	10.6619	0.669461	0.243326	2.39043	10.5231	0.0631779	1.14104	0.183714
2874.32	2.87432	2.87432e-06	28947.9	0.0463087	10.5418	0.667639	0.226048	2.23467	9.86599	0.0844374	1.19613	0.165037
2882.9	2.8829	2.8829e-06	29170.8	0.0321185	10.6589	0.708347	0.17701	2.1048	9.36212	0.120999	1.30551	0.205265
2891.48	2.89148	2.89148e-06	29389.3	0.0152433	10.7797	0.764455	0.145118	2.11651	9.05621	0.148815	1.38252	0.213383
2900.06	2.90006	2.90006e-06	29232.7	0.0117795	11.064	0.713953	0.139049	1.87192	8.80213	0.193787	1.26892	0.266787
2908.64	2.90864	2.90864e-06	29163	0.015325	11.5194	0.608551	0.128054	1.50941	9.0818	0.296835	1.11977	0.419274
2917.22	2.91722	2.91722e-06	29233.9	0.0252389	11.4628	0.584746	0.162107	1.45188	9.50935	0.341133	1.04219	0.501885
2925.8	2.9258	2.9258e-06	29327.6	0.0624304	11.3046	0.709777	0.213534	1.64054	9.73077	0.233513	1.06191	0.470991
2934.38	2.93438	2.93438e-06	28993.2	0.125004	11.8744	0.745098	0.212613	1.76583	9.62821	0.162448	1.10174	0.394208
2942.96	2.94296	2.94296e-06	29148.6	0.15316	12.2893	0.599273	0.160755	1.86867	9.52872	0.185759	1.00496	0.34471
2951.54	2.95154	2.95154e-06	29092.2	0.130124	12.235	0.582567	0.10078	2.0766	9.85955	0.169211	0.726011	0.363695
2960.12	2.96012	2.96012e-06	29271.9	0.0985375	11.8086	0.698086	0.0855055	2.25963	9.79783	0.130859	0.61478	0.425804
2968.7	2.9687	2.9687e-06	29349	0.0887831	11.1363	0.697372	0.126319	2.35196	9.32591	0.138449	0.790956	0.461531
2977.28	2.97728	2.97728e-06	29330.7	0.0904557	10.9551	0.603963	0.168499	2.39292	9.12789	0.207786	0.965434	0.386082
2985.86	2.98586	2.98586e-06	29108.2	0.0874086	11.1893	0.591514	0.199835	2.32274	9.10905	0.253176	0.977588	0.282539
2994.44	2.99444	2.99444e-06	29184	0.0743525	11.1378	0.679618	0.19358	2.1426	9.2729	0.248058	0.928928	0.259923
3003.02	3.00302	3.00302e-06	29014.5	0.0582256	11.1142	0.639005	0.11406	1.99273	9.78687	0.274712	0.891964	0.292435
3011.6	3.0116	3.0116e-06	29047.1	0.0491813	11.1652	0.503555	0.0669499	1.99131	9.7828	0.247313	0.854438	0.356615
3020.18	3.02018	3.02018e-06	29091.9	0.0610274	11.4412	0.43411	0.0960228	2.10797	8.99366	0.175874	0.775825	0.405939
3028.76	3.02876	3.02876e-06	29260.4	0.074826	11.7099	0.514111	0.154667	2.08633	8.87856	0.146447	0.819156	0.378816
3037.34	3.03734	3.03734e-06	29414.8	0.0764412	11.7009	0.64894	0.199676	1.86447	9.38129	0.177592	0.95873	0.307898
3045.92	3.04592	3.04592e-06	29230.1	0.0782596	11.7032	0.61301	0.213082	1.65304	9.75385	0.237309	0.968988	0.269557
3054.5	3.0545	3.0545e-06	29327.6	0.0880985	12.3731	0.591486	0.19597	1.63706	9.9672	0.277554	0.782805	0.327156
3063.08	3.06308	3.06308e-06	29362.9	0.0827709	12.822	0.671321	0.143193	1.85405	9.99439	0.23829	0.657605	0.385045
3071.66	3.07166	3.07166e-06	29370	0.0981687	12.665	0.650372	0.11578	2.06813	9.93218	0.184553	0.616035	0.376982
3080.24	3.08024	3.08024e-06	29220.3	0.132591	12.3162	0.611079	0.159647	2.14989	9.96753	0.148201	0.704656	0.306945
3088.82	3.08882	3.08882e-06	29118.7	0.139646	11.5904	0.628907	0.199522	2.3183	10.0297	0.15661	0.926148	0.269264
3097.4	3.0974	3.0974e-06	29230.9	0.0919943	10.873	0.552026	0.222141	2.48174	9.8782	0.208931	0.978787	0.276398
3105.98	3.10598	3.10598e-06	29516.8	0.0762025	10.6043	0.41045	0.253388	2.33197	9.52885	0.197706	0.93487	0.258076
3114.56	3.11456	3.11456e-06	29417.5	0.109609	10.5301	0.31166	0.242434	2.14114	9.3916	0.105176	0.81897	0.296751
3123.14	3.12314	3.12314e-06	28999.2	0.12031	10.2803	0.28906	0.1899	2.14971	9.78567	0.0559879	0.659746	0.375459
3131.72	3.13172	3.13172e-06	29211.1	0.110705	10.2417	0.359002	0.126171	2.12969	10.3123	0.0884264	0.604225	0.361767
3140.3	3.1403	3.1403e-06	29138.2	0.074815	10.4715	0.460075	0.102928	1.93642	10.285	0.174056	0.625547	0.316365
3148.88	3.14888	3.14888e-06	29301.5	0.0294905	10.7076	0.576386	0.139468	1.77342	9.95003	0.253858	0.632819	0.277018
3157.46	3.15746	3.15746e-06	29215.6	0.0155256	10.7973	0.685569	0.183995	1.84835	9.63201	0.276582	0.708981	0.240072
3166.04	3.16604	3.16604e-06	29240.4	0.0397463	10.6584	0.677349	0.179449	1.89196	9.1542	0.30399	0.817516	0.186607
3174.62	3.17462	3.17462e-06	29220.2	0.0711368	10.6961	0.581035	0.155131	1.82644	8.8535	0.330112	0.908893	0.163094
3183.2	3.1832	3.1832e-06	29239	0.0870752	10.9078	0.540629	0.14308	1.70729	8.88735	0.352531	0.998618	0.245999
3191.78	3.19178	3.19178e-06	29343.8	0.0948087	11.295	0.550904	0.125244	1.67348	8.96797	0.31391	1.02888	0.369874
3200.36	3.20036	3.20036e-06	29335.6	0.0739048	11.908	0.555703	0.136535	1.75384	9.11382	0.209114	0.973208	0.380816
3208.94	3.20894	3.20894e-06	29384.3	0.0606657	11.9327	0.522225	0.163563	1.77074	9.56505	0.196185	0.869497	0.356332
3217.52	3.21752	3.21752e-06	28979.5	0.049409	11.3537	0.517037	0.150781	1.94663	10.0816	0.3031	0.805419	0.364344
3226.1	3.2261	3.2261e-06	29010.9	0.0262704	11.2305	0.484679	0.111713	2.25236	10.2618	0.367963	0.742535	0.343956
3234.68	3.23468	3.23468e-06	29281.4	0.0244321	11.3256	0.422681	0.121092	2.21998	10.162	0.265265	0.708533	0.294837
3243.26	3.24326	3.24326e-06	29152.6	0.0766236	11.1945	0.455432	0.145651	1.82517	9.94778	0.144676	0.678066	0.276791
3251.84	3.25184	3.25184e-06	28874.1	0.129349	11.0709	0.542424	0.131418	1.66667	10.076	0.135926	0.672226	0.240887
3260.42	3.26042	3.26042e-06	28982.8	0.097645	10.8963	0.538785	0.1628	1.74501	10.1062	0.197458	0.684292	0.184257
3269	3.269	3.269e-06	29129.7	0.0511944	10.9796	0.471401	0.244528	1.72636	9.56922	0.252943	0.657226	0.150135
3277.58	3.27758	3.27758e-06	29056.1	0.0400996	11.1549	0.47685	0.288552	1.7782	8.91883	0.261962	0.697049	0.15802
3286.16	3.28616	3.28616e-06	29081	0.0517387	11.1127	0.579434	0.299936	1.97806	8.92201	0.307802	0.853598	0.205706
3294.74	3.29474	3.29474e-06	28898.1	0.054108	10.9953	0.724654	0.284571	2.15332	9.67169	0.354382	1.04464	0.20364
3303.32	3.30332	3.30332e-06	29216.9	0.0531104	11.3349	0.768511	0.230409	2.24811	10.1637	0.30871	1.16767	0.184114
3311.9	3.3119	3.3119e-06	29089.5	0.0588292	11.5831	0.643518	0.203253	2.26689	10.0362	0.254639	1.18108	0.204408
3320.48	3.32048	3.32048e-06	28978.3	0.0528499	11.6455	0.586821	0.23191	2.16311	9.7369	0.2679	1.03622	0.218622
3329.06	3.32906	3.32906e-06	29329.1	0.0626817	11.1605	0.572384	0.255257	1.91267	9.16009	0.31523	0.842453	0.255679
3337.64	3.33764	3.33764e-06	29013.6	0.0862281	10.5844	0.487809	0.225822	1.49571	8.77185	0.300603	0.786793	0.317057
3346.22	3.34622	3.34622e-06	29435.7	0.103875	10.5496	0.464341	0.15694	1.21215	9.08767	0.232344	0.767677	0.309062
3354.8	3.3548	3.3548e-06	29156	0.0963254	10.7334	0.509204	0.11634	1.33416	9.42185	0.176802	0.67269	0.284054
3363.38	3.36338	3.36338e-06	29115.5	0.0686146	10.8261	0.51198	0.137596	1.51635	9.07318	0.202131	0.669653	0.285791
3371.96	3.37196	3.37196e-06	28995.4	0.065914	10.8464	0.521469	0.209187	1.71837	8.59262	0.242029	0.845826	0.333649
3380.54	3.38054	3.38054e-06	28964.5	0.0800971	10.8687	0.586254	0.251142	1.98039	8.74045	0.229863	1.00747	0.387772
3389.12	3.38912	3.38912e-06	28818.9	0.0958264	10.6856	0.631023	0.222556	2.0832	9.262	0.239992	1.00522	0.338048
3397.7	3.3977	3.3977e-06	28813.7	0.101181	10.326	0.648557	0.182273	1.99453	9.60695	0.25954	0.897677	0.259556
3406.28	3.40628	3.40628e-06	28840.7	0.0743915	10.598	0.579914	0.206771	1.70452	9.77085	0.252595	0.77292	0.233633
3414.86	3.41486	3.41486e-06	28545.3	0.0453653	11.4088	0.570735	0.2437	1.44258	9.42658	0.213005	0.706915	0.255799
3423.44	3.42344	3.42344e-06	28648.5	0.0384538	11.7285	0.582659	0.242786	1.43278	8.8724	0.187233	0.692925	0.330643
3432.02	3.43202	3.43202e-06	28556	0.0283959	11.118	0.422527	0.171749	1.79827	8.86322	0.224501	0.754889	0.383697
3440.6	3.4406	3.4406e-06	28764.7	0.0246619	10.2575	0.265287	0.116612	2.23864	8.90011	0.267124	0.806998	0.347536
3449.18	3.44918	3.44918e-06	28601.6	0.0411333	9.74791	0.313304	0.175456	2.30049	8.65217	0.28741	0.685696	0.249446
3457.76	3.45776	3.45776e-06	28557	0.0473071	10.0581	0.481973	0.244226	1.98713	8.505	0.262613	0.578864	0.197758
3466.34	3.46634	3.46634e-06	28601.3	0.0358145	10.5188	0.598705	0.187147	1.78533	8.57337	0.284682	0.706189	0.25324
3474.92	3.47492	3.47492e-06	28543.7	0.0561002	11.0799	0.656088	0.088005	1.6291	8.77105	0.295995	0.935583	0.320447
3483.5	3.4835	3.4835e-06	28367.3	0.0990065	11.6034	0.708865	0.0615795	1.38777	9.02572	0.208255	0.939209	0.310478
3492.08	3.49208	3.49208e-06	28550.7	0.0985157	11.5453	0.674172	0.117594	1.26839	9.46298	0.122952	0.843129	0.286976
3500.66	3.50066	3.50066e-06	28509.5	0.0622237	10.9788	0.602218	0.227651	1.44225	9.65774	0.145833	0.839123	0.317834
3509.24	3.50924	3.50924e-06	28813.9	0.0314032	10.2219	0.668758	0.286624	1.69217	9.39238	0.19463	0.850415	0.376648
3517.82	3.51782	3.51782e-06	28622.8	0.0412098	10.1136	0.71799	0.265337	1.66336	8.87775	0.177337	0.949453	0.307701
3526.4	3.5264	3.5264e-06	28767.8	0.0795955	10.7702	0.619602	0.234009	1.54532	8.48188	0.140829	1.0776	0.231878
3534.98	3.53498	3.53498e-06	28589.4	0.107624	11.2913	0.553516	0.199294	1.7193	8.53451	0.107811	1.07723	0.24553
3543.56	3.54356	3.54356e-06	28359.6	0.132207	11.5048	0.459352	0.222697	2.00628	8.98049	0.124661	0.942499	0.271093
3552.14	3.55214	3.55214e-06	28752.6	0.167283	11.7953	0.387381	0.243327	2.20063	9.34696	0.183722	0.856261	0.313853
3560.72	3.56072	3.56072e-06	28465.5	0.201163	11.7109	0.462817	0.173925	2.3081	9.60349	0.189875	0.97886	0.362262
3569.3	3.5693	3.5693e-06	28500.8	0.193956	11.3189	0.612602	0.103516	2.16622	9.74244	0.125188	0.981163	0.386494
3577.88	3.57788	3.57788e-06	28684.2	0.15104	11.0111	0.70052	0.119275	1.99909	9.73656	0.125936	0.722136	0.372304
3586.46	3.58646	3.58646e-06	28433.4	0.0845631	11.1572	0.657961	0.178766	1.9917	9.60571	0.27248	0.515772	0.33726
3595.04	3.59504	3.59504e-06	28724.4	0.0517755	10.9926	0.535123	0.200483	1.92636	9.17524	0.388908	0.616968	0.314825
3603.62	3.60362	3.60362e-06	28743.5	0.102312	10.312	0.491374	0.180781	1.96055	8.68296	0.313125	0.787487	0.30578
3612.2	3.6122	3.6122e-06	28652	0.173352	9.97609	0.57291	0.153777	1.98485	8.57997	0.245317	0.751086	0.342227
3620.78	3.62078	3.62078e-06	28602.9	0.169138	10.3665	0.703246	0.125344	2.06864	9.10985	0.324919	0.671953	0.43907
3629.36	3.62936	3.62936e-06	28609	0.123702	10.8363	0.801394	0.109998	2.30999	9.86128	0.449946	0.644032	0.450351
3637.94	3.63794	3.63794e-06	28584.9	0.0783687	10.8658	0.706311	0.17544	2.16362	10.1808	0.496743	0.613103	0.384616
3646.52	3.64652	3.64652e-06	28726.2	0.0603368	10.7202	0.55786	0.276247	1.89066	10.3563	0.441424	0.658273	0.385691
3655.1	3.6551	3.6551e-06	28803.1	0.0633405	11.0022	0.55234	0.282041	2.02242	10.5823	0.343499	0.753896	0.406411
3663.68	3.66368	3.66368e-06	28531.6	0.0892554	11.2256	0.546461	0.212091	2.27423	10.2981	0.352061	0.830627	0.361315
3672.26	3.67226	3.67226e-06	28912.3	0.102383	11.3181	0.452135	0.172242	2.29424	9.76276	0.482739	0.779323	0.284728
3680.84	3.68084	3.68084e-06	28847.6	0.107141	11.5988	0.387458	0.162296	2.12084	9.62656	0.534483	0.695823	0.250825
3689.42	3.68942	3.68942e-06	28938.9	0.134843	12.0025	0.367845	0.159236	2.08941	9.39522	0.474548	0.788942	0.215591
3698	3.698	3.698e-06	28917.5	0.118556	12.1895	0.411017	0.149383	2.15446	9.09191	0.312241	0.987113	0.208782
3706.58	3.70658	3.70658e-06	28769.6	0.0675253	12.0717	0.457469	0.144641	2.25512	9.06736	0.164858	1.0538	0.279208
3715.16	3.71516	3.71516e-06	28645.2	0.0514771	12.0186	0.440417	0.154889	2.29196	9.10603	0.114049	0.942023	0.320348
3723.74	3.72374	3.72374e-06	28709.3	0.0642568	11.925	0.427232	0.134362	2.17275	8.97855	0.137368	0.836958	0.263465
3732.32	3.73232	3.73232e-06	28905.1	0.0596855	11.4533	0.484435	0.102267	2.17505	8.66092	0.175159	0.728341	0.177379
3740.9	3.7409	3.7409e-06	28543.7	0.0283296	10.9239	0.535274	0.0796528	2.12049	8.66772	0.183829	0.674175	0.14307
3749.48	3.74948	3.74948e-06	29013.3	0.00611089	10.8539	0.509237	0.0599077	1.9559	9.00327	0.187465	0.720801	0.165239
3758.06	3.75806	3.75806e-06	28921.3	0.0025331	10.749	0.446496	0.0848611	1.86332	9.1456	0.185242	0.784312	0.197953
3766.64	3.76664	3.76664e-06	28721.5	0.00607288	10.6493	0.458925	0.129793	1.71751	9.0141	0.156134	0.776929	0.182607
3775.22	3.77522	3.77522e-06	28748.7	0.0138463	10.9675	0.501619	0.124197	1.64638	9.10072	0.153662	0.775919	0.193091
3783.8	3.7838	3.7838e-06	29072.1	0.0375009	11.4218	0.57146	0.105946	1.75051	9.24225	0.137779	1.06417	0.252957
3792.38	3.79238	3.79238e-06	28853.6	0.0722153	11.6411	0.647627	0.119999	1.98521	9.17873	0.111294	1.2793	0.364533
3800.96	3.80096	3.80096e-06	28608.7	0.0847421	11.4741	0.607495	0.122854	2.13845	9.37757	0.123729	1.08275	0.437171
3809.54	3.80954	3.80954e-06	28647.3	0.076085	10.8811	0.488511	0.111311	2.01637	9.90317	0.158354	0.874246	0.366082
3818.12	3.81812	3.81812e-06	28854.6	0.0526079	10.2683	0.426032	0.118121	1.80052	10.0946	0.185163	0.912852	0.308142
3826.7	3.8267	3.8267e-06	28757.5	0.0342541	10.4915	0.444647	0.147539	1.58923	9.79839	0.177939	0.93493	0.245011
3835.28	3.83528	3.83528e-06	28538.4	0.0634626	11.1431	0.484338	0.144768	1.50059	9.24057	0.154226	0.851466	0.200858
3843.86	3.84386	3.84386e-06	28763.6	0.0975842	11.5695	0.443338	0.119136	1.61168	9.04987	0.206576	0.781416	0.241826
3852.44	3.85244	3.85244e-06	28564.3	0.0630219	11.6461	0.410458	0.135004	1.77646	9.01505	0.288752	0.643054	0.275661
3861.02	3.86102	3.86102e-06	28370.7	0.0366243	11.4902	0.390302	0.201463	1.82012	9.17265	0.304234	0.499099	0.209796
3869.6	3.8696	3.8696e-06	28409.2	0.0575761	11.1197	0.313856	0.290948	1.81065	9.50159	0.299481	0.518315	0.159519
3878.18	3.87818	3.87818e-06	28505.4	0.0741456	10.7185	0.255865	0.289623	1.84282	10.0874	0.236091	0.699785	0.154383
3886.76	3.88676	3.88676e-06	28641.4	0.0804009	10.6557	0.295072	0.186867	1.81135	10.5145	0.125379	0.760536	0.178935
3895.34	3.89534	3.89534e-06	28527.2	0.081131	11.2341	0.383368	0.148759	1.76722	10.1334	0.0976219	0.643357	0.234029
3903.92	3.90392	3.90392e-06	28500.9	0.0449441	11.7767	0.461383	0.157241	1.80405	9.52129	0.122387	0.626118	0.319038
3912.5	3.9125	3.9125e-06	28468.5	0.0222524	11.5573	0.499148	0.100254	1.76249	9.00894	0.120786	0.738826	0.32217
3921.08	3.92108	3.92108e-06	28338.7	0.0674452	10.8509	0.45671	0.0818146	1.69828	8.74692	0.147758	0.693165	0.257928
3929.66	3.92966	3.92966e-06	28515.5	0.155222	10.5293	0.37943	0.126722	1.84193	8.76794	0.159872	0.613731	0.210218
3938.24	3.93824	3.93824e-06	28510.4	0.175544	10.6168	0.347421	0.126414	2.098	8.87043	0.113654	0.704524	0.289018
3946.82	3.94682	3.94682e-06	28294.9	0.104947	10.3882	0.393016	0.102094	2.15087	9.02375	0.142415	0.774192	0.424066
3955.4	3.9554	3.9554e-06	28466.8	0.0555881	10.1962	0.441752	0.117392	1.96896	9.06658	0.250398	0.704618	0.423044
3963.98	3.96398	3.96398e-06	28543.4	0.0819867	9.89283	0.507758	0.170571	1.76927	8.89904	0.262119	0.639928	0.403684
3972.56	3.97256	3.97256e-06	28178.3	0.129823	9.6449	0.548087	0.230824	1.57755	8.77645	0.224927	0.584923	0.41618
3981.14	3.98114	3.98114e-06	28250.1	0.123063	9.93605	0.502034	0.235497	1.5755	8.81237	0.265964	0.501265	0.372449
3989.72	3.98972	3.98972e-06	28545.8	0.0854394	10.4389	0.44496	0.254618	1.78297	8.89596	0.28985	0.423181	0.244342
3998.3	3.9983	3.9983e-06	28081.9	0.0789761	10.501	0.418961	0.289268	1.88323	8.93896	0.265397	0.374128	0.211118
4006.88	4.00688	4.00688e-06	28066	0.201912	9.55341	0.478328	0.251268	1.65283	8.35971	0.231305	0.388203	0.279166
4015.46	4.01546	4.01546e-06	26545.9	0.505392	7.86713	0.762568	0.190785	1.30747	6.60889	0.177369	0.434269	0.31404
4024.04	4.02404	4.02404e-06	24733	0.923623	6.11231	1.11377	0.106368	1.01621	4.59695	0.126326	0.43937	0.259772
4032.62	4.03262	4.03262e-06	23742.2	1.37035	4.71028	1.16616	0.0586414	0.807462	3.11847	0.11489	0.423361	0.162923
4041.2	4.0412	4.0412e-06	22925.4	1.70244	3.83722	1.02263	0.0593236	0.651366	2.1671	0.0966375	0.399576	0.111795
4049.78	4.04978	4.04978e-06	22139.5	1.7639	3.27814	0.867746	0.0459986	0.461772	1.53482	0.0838899	0.307566	0.0998147
4058.36	4.05836	4.05836e-06	20839.6	1.53114	2.85206	0.660773	0.0254474	0.388189	1.17708	0.105585	0.222213	0.0866248
4066.94	4.06694	4.06694e-06	19849.7	1.14857	2.73192	0.429329	0.0235362	0.375899	0.941815	0.098201	0.144247	0.0450627
4075.52	4.07552	4.07552e-06	18929	0.983192	2.62516	0.315541	0.045245	0.251937	0.606167	0.0475449	0.0650523	0.0118066
4084.1	4.0841	4.0841e-06	18262.3	1.20952	2.32792	0.262075	0.0806493	0.125328	0.305583	0.0165336	0.035762	0.00665194
4092.68	4.09268	4.09268e-06	17606.7	1.51652	2.1174	0.178323	0.0778149	0.0583688	0.155167	0.0265084	0.0613668	0.0118924
4101.26	4.10126	4.10126e-06	16806.5	1.51753	1.93745	0.11181	0.0359946	0.0444575	0.102401	0.0413339	0.0928718	0.013107
4109.84	4.10984	4.10984e-06	16630.9	1.47658	1.88705	0.0911217	0.0119003	0.0619366	0.0689166	0.0260103	0.065424	0.0114385
4118.43	4.11843	4.11843e-06	16571.6	1.42452	1.96565	0.105651	0.0248769	0.079436	0.0898238	0.00930996	0.0219553	0.0112777
4127.01	4.127	4.127e-06	16407.8	1.33954	1.87309	0.135172	0.0628741	0.0893193	0.173577	0.0152065	0.00596938	0.00747652
4135.59	4.13558	4.13558e-06	16378.9	1.2934	1.78847	0.149128	0.0783134	0.0537668	0.197422	0.044843	0.00419284	0.00466291
4144.16	4.14417	4.14417e-06	16445.6	1.30771	1.70619	0.155543	0.0425062	0.016414	0.146534	0.063846	0.00373131	0.00829988
4152.74	4.15274	4.15274e-06	16235.2	1.35038	1.57606	0.232554	0.00986081	0.00955903	0.151043	0.037727	0.00201057	0.0136655
4161.33	4.16133	4.16133e-06	16291	1.2167	1.54634	0.319841	0.00333823	0.0191353	0.187708	0.0176081	0.00202227	0.0195889
4169.9	4.1699	4.16991e-06	16320.5	0.928491	1.75287	0.29552	0.0102425	0.0306345	0.16845	0.0405607	0.0130505	0.0252751
4178.48	4.17848	4.17848e-06	16389.2	0.831039	1.90084	0.167836	0.0179174	0.0332877	0.1141	0.0662794	0.0627881	0.0205608
4187.07	4.18707	4.18707e-06	16389.2	1.17077	1.87594	0.1055	0.015051	0.0317726	0.0606615	0.0492642	0.152318	0.0164154
4195.64	4.19564	4.19564e-06	16404.3	1.78695	1.71182	0.101587	0.0129796	0.0182351	0.0252517	0.0411153	0.192919	0.014211
4204.23	4.20423	4.20423e-06	16483.1	1.93402	1.46232	0.0809523	0.022333	0.0123917	0.0149558	0.0606213	0.174182	0.00962397
4212.81	4.21281	4.21281e-06	16431.8	1.45187	1.4351	0.0964855	0.0311475	0.040728	0.0353945	0.0918722	0.161283	0.0115045
4221.38	4.22138	4.22138e-06	16344.1	1.14478	1.64166	0.129916	0.0201192	0.0903321	0.0849323	0.114331	0.0949964	0.0233148
4229.97	4.22996	4.22997e-06	16372	1.26708	1.80076	0.102555	0.00938963	0.0956227	0.132806	0.0803839	0.0263479	0.0436881
4238.55	4.23855	4.23854e-06	16661.1	1.66355	1.79641	0.0789059	0.00866176	0.0477413	0.162462	0.0477599	0.00471001	0.0574111
4247.12	4.24712	4.24712e-06	16435.1	1.94917	1.63528	0.0739841	0.0169333	0.0160621	0.201744	0.0369206	0.00212194	0.0370579
4255.7	4.2557	4.25571e-06	16385.4	1.72606	1.61675	0.0698893	0.0542535	0.0228368	0.220398	0.0220469	0.00457088	0.0128018
4264.28	4.26429	4.26428e-06	16390	1.61448	1.69571	0.067418	0.0868882	0.0365601	0.137542	0.00892537	0.00982766	0.00669289
4272.87	4.27287	4.27287e-06	16518.5	1.96315	1.60567	0.0596579	0.0555955	0.0283735	0.0467476	0.00440989	0.0150181	0.0106772
4281.45	4.28145	4.28145e-06	16439.3	2.51613	1.49137	0.0932981	0.0174378	0.0212566	0.0144777	0.00334334	0.0166858	0.0163121
4290.03	4.29003	4.29003e-06	16421.1	2.8552	1.55424	0.130833	0.0116296	0.0247887	0.0196607	0.00390149	0.0132772	0.0138731
4298.61	4.29861	4.29861e-06	16371.5	2.57755	1.57819	0.109158	0.0145448	0.0297136	0.0442537	0.0112997	0.0112912	0.0142138
4307.19	4.30719	4.30719e-06	16419	2.22187	1.59026	0.0943548	0.0134373	0.0361882	0.0907124	0.0183273	0.0188699	0.0414557
4315.77	4.31577	4.31577e-06	16426.2	2.1241	1.59826	0.0873429	0.0241115	0.0471955	0.153872	0.0114791	0.0336461	0.0727023
4324.35	4.32435	4.32435e-06	16473.4	2.21541	1.59382	0.0707061	0.0449915	0.0938442	0.153944	0.00290789	0.0500447	0.0565577
4332.93	4.33293	4.33293e-06	16422	2.3195	1.89663	0.076144	0.0459912	0.129724	0.083276	0.000406661	0.0629803	0.0234175
4341.51	4.34151	4.34151e-06	16373.8	2.11534	2.10835	0.0849241	0.0271675	0.0857488	0.036081	9.48967e-05	0.0550744	0.00725472
4350.09	4.35009	4.35009e-06	16175.2	1.76519	1.80429	0.0578964	0.0224679	0.0274242	0.0227002	0.000271677	0.0449207	0.00463842
4358.67	4.35867	4.35867e-06	16482.7	1.6399	1.45493	0.0396699	0.0369282	0.0125761	0.0185071	0.00111115	0.0279848	0.00807922
4367.25	4.36725	4.36725e-06	16291.7	1.62524	1.47823	0.0624094	0.0506928	0.0379188	0.0279773	0.00203387	0.0169247	0.0152158
4375.83	4.37583	4.37583e-06	16409.3	1.54305	1.72047	0.10576	0.0525978	0.0617329	0.0422997	0.00270392	0.0426887	0.0367737
4384.41	4.38441	4.38441e-06	16251	1.56605	1.77257	0.136605	0.031832	0.0388438	0.0539977	0.00554354	0.0958418	0.0563077
4392.99	4.39299	4.39299e-06	16340	1.81842	1.53046	0.122566	0.00983534	0.0153035	0.0977146	0.00768895	0.112428	0.0403474
4401.57	4.40157	4.40157e-06	16307	2.14358	1.67901	0.0835822	0.00185897	0.0131966	0.138232	0.00472543	0.0714235	0.0200238
4410.15	4.41015	4.41015e-06	16169.6	2.39226	2.07045	0.0517932	0.00122861	0.0104972	0.101558	0.00238448	0.026655	0.0135886
4418.73	4.41873	4.41873e-06	16223.2	2.28767	2.00404	0.0558966	0.00292299	0.0130509	0.0843887	0.00253586	0.00801646	0.0248587
4427.31	4.42731	4.42731e-06	16263.5	1.93981	1.71877	0.0877847	0.0078786	0.0356424	0.142252	0.00276241	0.00282062	0.0396055
4435.89	4.43589	4.43589e-06	16021.1	2.05309	1.50793	0.132618	0.0147027	0.0562021	0.177	0.00546169	0.0013513	0.0355678
4444.47	4.44447	4.44447e-06	16149.3	2.36613	1.5663	0.150014	0.0198347	0.0495176	0.133021	0.00828459	0.00122748	0.0281405
4453.05	4.45305	4.45305e-06	16079.3	2.15832	1.88924	0.1082	0.0311586	0.0377458	0.0832203	0.00641819	0.00125149	0.0180006
4461.63	4.46163	4.46163e-06	15985.8	1.8584	1.97221	0.110252	0.0546502	0.0220313	0.0782951	0.004046	0.00159669	0.0143133
4470.21	4.47021	4.47021e-06	15841.7	1.74608	1.76273	0.175967	0.0730732	0.0130269	0.0843069	0.00275918	0.00285084	0.0236206
4478.79	4.47879	4.47879e-06	16123.3	1.7399	1.66779	0.202171	0.0725873	0.0202846	0.0850619	0.00881573	0.00609648	0.0294541
4487.37	4.48737	4.48737e-06	16001.4	2.00707	1.66566	0.189295	0.0785151	0.0346575	0.081046	0.0398782	0.00798953	0.0170776
4495.95	4.49595	4.49595e-06	15897.9	2.1887	1.53707	0.151432	0.0944049	0.0512061	0.0960447	0.0878258	0.00740602	0.00422519
4504.53	4.50453	4.50453e-06	15822	1.90779	1.64857	0.112687	0.106532	0.056163	0.0959733	0.111083	0.0178836	0.00126424
4513.11	4.51311	4.51311e-06	15920.3	1.36983	1.90848	0.092897	0.0651819	0.0329126	0.103049	0.0933103	0.0495763	0.00947969
4521.69	4.52169	4.52169e-06	15935.6	1.21069	1.86662	0.0638805	0.0239661	0.0245559	0.167665	0.0473866	0.0750404	0.0423738
4530.27	4.53027	4.53027e-06	15955.8	1.5712	1.68742	0.0394009	0.0161371	0.0706822	0.226356	0.028459	0.0781129	0.0729613
4538.85	4.53885	4.53885e-06	15896.4	1.86795	1.71316	0.0405035	0.0122439	0.12392	0.207403	0.0356919	0.083216	0.0528084
4547.43	4.54743	4.54743e-06	15833.9	1.70579	1.88225	0.0668272	0.0120328	0.126468	0.120332	0.0263874	0.076417	0.024935
4556.01	4.55601	4.55601e-06	15800.3	1.42638	1.85681	0.140794	0.0307527	0.112464	0.0722976	0.01566	0.0661056	0.0173037
4564.59	4.56459	4.56459e-06	15983	1.45435	1.80175	0.206801	0.0526508	0.0610038	0.0810853	0.0298326	0.0424052	0.0184197
4573.17	4.57317	4.57317e-06	16111.4	1.36674	1.84856	0.167935	0.0456695	0.0157196	0.0946106	0.0566011	0.0193937	0.0203161
4581.75	4.58175	4.58175e-06	15934.4	1.00166	1.79656	0.0945539	0.0252724	0.0168386	0.170992	0.0939419	0.0128538	0.0147994
4590.33	4.59033	4.59033e-06	15963.9	0.915374	1.84535	0.0392626	0.0132561	0.0671705	0.331319	0.137431	0.0284136	0.0203937
4598.91	4.59891	4.59891e-06	16107.9	1.04793	2.29529	0.00974746	0.0139908	0.147058	0.47959	0.111286	0.052765	0.0509426
4607.49	4.60749	4.60749e-06	16880	0.973495	2.86154	0.00678882	0.04305	0.216216	0.642383	0.0463974	0.0748794	0.0842845
4616.07	4.61607	4.61607e-06	17525.4	0.901318	3.15918	0.0241487	0.0982466	0.336318	0.901189	0.0259742	0.10346	0.0818733
4624.65	4.62465	4.62465e-06	18468.7	0.997003	3.54789	0.0507251	0.147617	0.611752	1.32949	0.0787983	0.0947442	0.0521922
4633.23	4.63323	4.63323e-06	19349.2	0.998325	4.40797	0.0881698	0.204437	1.03927	1.93002	0.229093	0.0603254	0.0603195
4641.81	4.64181	4.64181e-06	21267.7	0.725828	5.42263	0.136625	0.239654	1.53298	2.52748	0.409498	0.0548036	0.148534
4650.39	4.65039	4.65039e-06	22862.9	0.490701	6.40988	0.143575	0.207167	1.99718	3.1117	0.480813	0.0967146	0.264464
4658.97	4.65897	4.65897e-06	23926.2	0.485947	7.51387	0.136406	0.198702	2.32625	3.79932	0.444026	0.159411	0.306832
4667.55	4.66755	4.66755e-06	25153.8	0.48896	8.75415	0.157214	0.220487	2.65919	4.38927	0.370581	0.187666	0.281292
4676.13	4.67613	4.67613e-06	25904	0.355399	9.32638	0.187469	0.258138	3.16861	4.76048	0.395657	0.1716	0.226634
4684.71	4.68471	4.68471e-06	26250.3	0.224652	9.37269	0.206	0.335258	3.66	4.97309	0.461826	0.166837	0.157779
4693.29	4.69329	4.69329e-06	26158.5	0.149256	9.52107	0.220695	0.341932	3.71137	4.9779	0.45763	0.142602	0.110867
4701.87	4.70187	4.70187e-06	25566.7	0.138849	9.38677	0.193671	0.274429	3.4842	4.84046	0.473205	0.134731	0.116565
4710.45	4.71045	4.71045e-06	24312	0.264592	8.80333	0.126239	0.269101	3.2964	4.48489	0.504552	0.119239	0.149145
4719.03	4.71903	4.71903e-06	23776	0.404822	7.98896	0.126947	0.312865	3.13598	3.97794	0.539804	0.0875075	0.12451
4727.61	4.72761	4.72761e-06	23545.5	0.407939	7.44032	0.200282	0.262495	2.9143	3.61729	0.513217	0.0799175	0.10731
4736.19	4.73619	4.73619e-06	22513.8	0.390928	7.06123	0.23297	0.169439	2.38782	3.38524	0.371286	0.0745696	0.12543
4744.77	4.74477	4.74477e-06	21109.6	0.444024	6.33573	0.22858	0.13963	1.76048	3.06387	0.282523	0.066168	0.105471
4753.35	4.75335	4.75335e-06	20344.2	0.570696	5.74895	0.254425	0.157825	1.43403	2.68487	0.236296	0.048813	0.0758188
4761.93	4.76193	4.76193e-06	19952.6	0.694968	5.70141	0.227106	0.208435	1.27618	2.42674	0.219668	0.030604	0.0482728
4770.51	4.77051	4.77051e-06	19687.2	0.76433	5.80167	0.154781	0.206482	1.15175	2.26591	0.204785	0.0428366	0.0514578
4779.09	4.77909	4.77909e-06	19426.1	0.825941	5.41505	0.128533	0.14015	1.02503	2.08301	0.193279	0.0676171	0.0767613
4787.67	4.78767	4.78767e-06	19192.9	0.891955	4.64925	0.109295	0.113202	0.855677	1.94689	0.213127	0.0620698	0.0937968
4796.25	4.79625	4.79625e-06	19453.7	0.923282	4.09199	0.0549606	0.109089	0.796131	2.02577	0.260924	0.0519082	0.130418
4804.83	4.80483	4.80483e-06	20114.3	1.06015	4.15714	0.0289501	0.141826	0.912146	2.33874	0.256784	0.0609263	0.153516
4813.41	4.81341	4.81341e-06	20435.5	1.18276	4.88313	0.0720941	0.214566	0.998792	2.75643	0.26726	0.0759332	0.150782
4821.99	4.82199	4.82199e-06	20833.4	1.14012	5.55974	0.116433	0.257897	1.04971	3.11343	0.335323	0.0543927	0.156136
4830.57	4.83057	4.83057e-06	20776.1	1.01379	5.57945	0.0854558	0.340149	1.21432	3.16039	0.389553	0.0270478	0.153491
4839.15	4.83915	4.83915e-06	21363.5	0.965489	5.40861	0.0851519	0.421498	1.37142	2.82979	0.371425	0.0256818	0.127951
4847.73	4.84773	4.84773e-06	21753.4	1.0172	5.23845	0.152154	0.364753	1.36504	2.50682	0.464676	0.043177	0.112948
4856.31	4.85631	4.85631e-06	21972.3	0.983805	4.8604	0.176397	0.223677	1.18146	2.39463	0.531891	0.058444	0.161415
4864.89	4.86489	4.86489e-06	21012.9	0.842571	4.60008	0.130375	0.143395	0.947018	2.40341	0.455639	0.0418207	0.232064
4873.47	4.87347	4.87347e-06	20481.4	0.754659	4.75388	0.0689123	0.135743	0.855502	2.42776	0.463438	0.0287863	0.227015
4882.05	4.88205	4.88205e-06	20158.2	0.837654	5.1463	0.0295942	0.187665	0.835283	2.39256	0.546692	0.0330354	0.15792
4890.63	4.89063	4.89063e-06	19982.5	1.10529	5.27253	0.0245838	0.294028	0.733452	2.20232	0.578421	0.0416048	0.111208
4899.21	4.89921	4.89921e-06	20385.5	1.14683	5.20686	0.0658811	0.370263	0.686803	1.88798	0.701108	0.0628946	0.112604
4907.79	4.90779	4.90779e-06	20398.9	0.918373	5.39305	0.113364	0.345952	0.714368	1.70934	0.775244	0.0709672	0.161638
4916.37	4.91637	4.91637e-06	19745.2	0.81543	5.41476	0.104826	0.279719	0.717424	1.73826	0.578292	0.0498152	0.212272
4924.95	4.92495	4.92495e-06	18790.3	0.886	5.02712	0.0896667	0.273186	0.690728	1.53408	0.403386	0.0310448	0.198994
4933.53	4.93353	4.93353e-06	17843	1.14159	4.47073	0.0986338	0.241302	0.671115	1.24278	0.365439	0.0252538	0.122439
4942.11	4.94211	4.94211e-06	17603.9	1.52241	4.04366	0.121927	0.167379	0.640235	1.14163	0.268928	0.0256925	0.0738062
4950.69	4.95069	4.95069e-06	17479.1	1.69389	3.9152	0.113751	0.188541	0.501368	0.974723	0.189115	0.0225484	0.0582037
4959.27	4.95927	4.95927e-06	17051.5	1.7588	3.97796	0.0790106	0.242712	0.361946	0.762211	0.186334	0.01386	0.0514584
4967.85	4.96785	4.96785e-06	17202.8	1.78208	3.74092	0.064466	0.189942	0.415766	0.836863	0.146606	0.010527	0.0537786
4976.43	4.97643	4.97643e-06	18091	1.6446	3.59251	0.0647142	0.0944071	0.5276	1.03742	0.085464	0.0176682	0.0402428
4985.01	4.98501	4.98501e-06	18319.4	1.35706	3.64248	0.0454235	0.0633831	0.566617	1.17187	0.0716958	0.032915	0.0248807
4993.59	4.99359	4.99359e-06	18235.2	1.04487	3.63124	0.0224521	0.0896766	0.582527	1.18132	0.0953091	0.0426682	0.0218229
5002.17	5.00217	5.00217e-06	18108.4	1.00514	3.73687	0.0321758	0.105344	0.591051	1.04404	0.102737	0.0408521	0.02151
5010.75	5.01075	5.01075e-06	17743.3	1.21698	3.40408	0.0754869	0.0845844	0.534688	1.05707	0.125592	0.0614314	0.0205601
5019.33	5.01933	5.01933e-06	17442.3	1.29099	2.80975	0.107123	0.0454481	0.41111	1.03842	0.19468	0.0846525	0.0186279
5027.91	5.02791	5.02791e-06	17302.7	1.10103	2.76383	0.0866291	0.0428668	0.310911	0.734991	0.247047	0.0580174	0.0301245
5036.49	5.03649	5.03649e-06	17168.5	1.221	2.70471	0.0390232	0.0613333	0.262499	0.520485	0.255112	0.0408983	0.0560344
5045.07	5.04507	5.04507e-06	17307.7	1.72307	2.38457	0.0233886	0.0453107	0.244896	0.577953	0.280705	0.0451673	0.0599714
5053.65	5.05365	5.05365e-06	16651	1.81839	2.23716	0.0611467	0.0251925	0.197709	0.658995	0.275397	0.0263029	0.0322167
5062.23	5.06223	5.06223e-06	16484.2	1.3371	2.48041	0.0975953	0.019146	0.176679	0.634446	0.168181	0.00649299	0.0154605
5070.81	5.07081	5.07081e-06	16713.8	1.00361	2.84382	0.0718463	0.0201417	0.220283	0.679951	0.0570204	0.00109926	0.0226394
5079.39	5.07939	5.07939e-06	16787.7	0.965569	2.83605	0.0390246	0.0264545	0.236719	0.731993	0.0148665	0.000674508	0.048812
5087.97	5.08797	5.08797e-06	16541.2	0.981835	2.87242	0.0319643	0.0295054	0.273355	0.67469	0.0243602	0.0023574	0.0745597
5096.55	5.09655	5.09655e-06	16764.8	1.01243	3.07134	0.0507194	0.0523413	0.327543	0.645296	0.0610675	0.00961654	0.0704923
5105.13	5.10513	5.10513e-06	17032.4	0.999416	3.11954	0.0714279	0.11802	0.336985	0.786527	0.105635	0.0255121	0.0700986
5113.71	5.11371	5.11371e-06	17850.8	0.875055	3.23297	0.078563	0.18577	0.327713	1.00242	0.187023	0.0356829	0.0756608
5122.29	5.12229	5.12229e-06	18318.2	0.792741	3.75182	0.11386	0.216533	0.376257	1.25335	0.326794	0.0328694	0.127173
5130.87	5.13087	5.13087e-06	19316.5	0.786958	4.52594	0.155526	0.243958	0.513908	1.64155	0.504108	0.0427515	0.232196
5139.45	5.13945	5.13945e-06	19937.6	0.733663	5.20858	0.137968	0.254794	0.603792	2.13029	0.746702	0.056965	0.269318
5148.03	5.14803	5.14803e-06	20640.1	0.572909	5.73876	0.120074	0.236254	0.654981	2.50149	0.871764	0.0697499	0.249736
5156.61	5.15661	5.15661e-06	21363.2	0.479684	6.02069	0.141726	0.266804	0.750974	2.82785	0.776649	0.100135	0.250274
5165.19	5.16519	5.16519e-06	22778.2	0.452122	6.27972	0.126698	0.353182	0.878535	3.28358	0.7377	0.113117	0.227837
5173.77	5.17377	5.17377e-06	24227.6	0.410823	6.91583	0.0731992	0.478766	0.983852	3.72425	0.705252	0.104677	0.188013
5182.35	5.18235	5.18235e-06	25021.8	0.39076	7.69776	0.0558271	0.628805	1.14818	4.28266	0.688613	0.0935381	0.17092
5190.93	5.19093	5.19093e-06	25605.9	0.378775	8.3042	0.108952	0.817906	1.24405	4.73057	0.805889	0.0564595	0.172566
5199.51	5.19951	5.19951e-06	26138.2	0.374411	8.70373	0.171853	1.01523	1.14703	4.66002	0.877357	0.0437512	0.204478
5208.09	5.20809	5.20809e-06	25782.5	0.349712	8.87414	0.151127	1.07414	1.06323	4.54977	0.852735	0.0756982	0.228123
5216.67	5.21667	5.21667e-06	25649.3	0.368345	8.81353	0.139822	0.986812	1.06795	4.71991	0.966312	0.0998674	0.185946
5225.25	5.22525	5.22525e-06	26157.3	0.384039	8.8413	0.165171	0.884595	1.10244	4.99708	1.2097	0.10449	0.183939
5233.83	5.23383	5.23383e-06	25784.2	0.328195	8.93864	0.148821	0.771106	1.06537	5.11535	1.3606	0.107682	0.236185
5242.41	5.24241	5.24241e-06	25328.3	0.329088	8.78234	0.110104	0.667768	1.07404	5.01024	1.42645	0.107988	0.282717
5250.99	5.25099	5.25099e-06	26579.6	0.401522	8.56016	0.112662	0.699566	1.38183	5.23125	1.54927	0.122827	0.350922
5259.57	5.25957	5.25957e-06	26126.7	0.419857	8.58339	0.168057	0.726013	1.75236	5.5583	1.61472	0.138034	0.389995
5268.15	5.26815	5.26815e-06	26426.4	0.344969	8.81227	0.208853	0.68892	1.73447	5.60353	1.39243	0.149522	0.386066
5276.73	5.27673	5.27673e-06	26208.7	0.293738	8.99858	0.21103	0.693737	1.38837	5.48928	1.11671	0.145618	0.400521
5285.31	5.28531	5.28531e-06	26501.7	0.330973	9.06986	0.160905	0.713586	1.08369	5.34587	1.15584	0.119625	0.476344
5293.89	5.29389	5.29389e-06	26284.5	0.396148	9.14389	0.0984697	0.763245	1.02257	5.45771	1.37128	0.101252	0.548792
5302.47	5.30247	5.30247e-06	26255.8	0.396802	8.90048	0.087877	0.821388	1.0992	5.82986	1.55049	0.106452	0.485444
5311.05	5.31105	5.31105e-06	26002.4	0.330702	8.52993	0.130611	0.826147	1.13672	5.7302	1.71577	0.0947666	0.416635
5319.63	5.31963	5.31963e-06	25660.4	0.269172	8.32297	0.170215	0.837514	1.12501	5.09165	1.73028	0.0711677	0.372199
5328.21	5.32821	5.32821e-06	26413.7	0.213744	8.44332	0.173715	0.807823	1.16119	4.73935	1.56207	0.0929226	0.32651
5336.79	5.33679	5.33679e-06	26506	0.131799	8.9527	0.157273	0.803975	1.24998	4.93418	1.42548	0.1386	0.300468
5345.37	5.34537	5.34537e-06	26796.8	0.0952762	9.06727	0.150652	0.904141	1.28217	5.41427	1.34439	0.136244	0.33043
5353.95	5.35395	5.35395e-06	26901.5	0.16089	8.5185	0.197691	1.00301	1.24959	5.48595	1.22141	0.124078	0.399587
5362.53	5.36253	5.36253e-06	25393.7	0.293416	7.87805	0.21794	0.958565	1.00098	4.90617	1.1919	0.128703	0.420114
5371.11	5.37111	5.37111e-06	22656.8	0.394281	6.68227	0.164728	0.79628	0.80215	4.03744	1.04435	0.115021	0.302504
5379.69	5.37969	5.37969e-06	20298	0.550998	4.97198	0.104277	0.534334	0.788048	3.04894	0.634364	0.0878269	0.178986
5388.27	5.38827	5.38827e-06	19210.1	0.930083	3.95271	0.0818805	0.278641	0.805223	2.12471	0.266124	0.0759542	0.130291
5396.85	5.39685	5.39685e-06	18573.7	1.31056	3.81669	0.0735872	0.142734	0.738107	1.52782	0.156263	0.0537169	0.119407
5405.43	5.40543	5.40543e-06	18322.7	1.30314	3.70802	0.0768507	0.119126	0.67124	1.35473	0.201738	0.0557488	0.0868697
5414.01	5.41401	5.41401e-06	17957.3	1.03892	3.4372	0.111841	0.115188	0.705821	1.38144	0.219655	0.0836137	0.0627678
5422.59	5.42259	5.42259e-06	17869.6	0.882448	3.39072	0.157238	0.118334	0.774419	1.32692	0.16112	0.074279	0.101072
5431.17	5.43117	5.43117e-06	18341.6	0.98739	3.61507	0.172364	0.126377	0.748368	1.30517	0.125287	0.045257	0.182018
5439.75	5.43975	5.43975e-06	18325.5	1.05871	3.81009	0.139628	0.159443	0.653478	1.31867	0.128846	0.031244	0.193008
5448.33	5.44833	5.44833e-06	17578.4	0.876744	3.74899	0.0781854	0.285162	0.501423	1.1986	0.14625	0.0171038	0.111317
5456.91	5.45691	5.45691e-06	17316.5	0.850407	3.67307	0.0320601	0.445293	0.311053	1.09647	0.19017	0.00702121	0.0530676
5465.49	5.46549	5.46549e-06	17814.4	1.03036	3.88499	0.0310147	0.499083	0.249075	1.20994	0.269003	0.00682405	0.0611269
5474.07	5.47407	5.47407e-06	18818.8	1.21509	4.4125	0.0594251	0.372251	0.399156	1.52829	0.315752	0.0202746	0.0843936
5482.65	5.48265	5.48265e-06	20501.5	1.21509	5.26365	0.0863204	0.293756	0.595091	1.87695	0.454041	0.0659475	0.12434
5491.23	5.49123	5.49123e-06	21147	0.94996	6.1669	0.105175	0.452771	0.707122	2.42803	0.692077	0.105998	0.183479
5499.81	5.49981	5.49981e-06	21872.3	0.736101	6.39644	0.102452	0.658146	0.795906	3.27333	0.798804	0.0793627	0.193234
5508.39	5.50839	5.50839e-06	22110.8	0.494455	6.31065	0.0855933	0.740832	0.928203	3.72834	0.764022	0.0412129	0.200519
5516.97	5.51697	5.51697e-06	21907.3	0.298247	6.45196	0.0709696	0.807016	1.00243	3.53154	0.802195	0.0282634	0.201338
5525.55	5.52555	5.52555e-06	21834.1	0.23342	6.37051	0.0416119	0.835619	0.906364	3.30836	0.859905	0.0203164	0.175759
5534.13	5.53413	5.53413e-06	21628.2	0.301549	6.57162	0.0331055	0.790249	0.694043	3.29408	0.822596	0.0188895	0.195889
5542.71	5.54271	5.54271e-06	21579	0.465465	6.89361	0.0594807	0.881425	0.5181	3.24981	0.730204	0.0198737	0.188454
5551.29	5.55129	5.55129e-06	21765.8	0.589439	6.93644	0.0952123	1.10867	0.581258	3.29072	0.718481	0.0210806	0.112878
5559.87	5.55987	5.55987e-06	22125.5	0.593508	7.12948	0.159393	1.33968	0.837974	3.48956	0.733643	0.052055	0.046114
5568.45	5.56845	5.56845e-06	22350.3	0.564232	7.20993	0.237101	1.48904	0.962198	3.65125	0.642578	0.101743	0.0434653
5577.03	5.57703	5.57703e-06	22286.5	0.514015	6.61615	0.25745	1.34537	0.872418	3.8466	0.578419	0.119855	0.0791997
5585.61	5.58561	5.58561e-06	22140	0.484323	6.14895	0.233973	1.16207	0.685653	4.20979	0.595965	0.110948	0.112156
5594.19	5.59419	5.59419e-06	22297.9	0.493474	6.28608	0.205112	1.23413	0.541511	4.37997	0.703053	0.0742861	0.161472
5602.77	5.60277	5.60277e-06	22474.7	0.382947	6.483	0.179494	1.39618	0.529945	4.22572	0.884486	0.0340806	0.235416
5611.35	5.61135	5.61135e-06	22464.2	0.322059	6.49399	0.157723	1.32234	0.613779	3.99103	0.96574	0.0241979	0.305401
5619.93	5.61993	5.61993e-06	22534.6	0.370434	6.46405	0.164439	1.04129	0.686793	3.96913	0.887564	0.0480595	0.318182
5628.51	5.62851	5.62851e-06	22467.7	0.377371	6.58975	0.144968	0.95473	0.71998	4.22913	0.752681	0.0772252	0.32471
5637.09	5.63709	5.63709e-06	22341.5	0.335426	6.90486	0.132905	1.0869	0.679493	4.37603	0.541991	0.0804587	0.357696
5645.67	5.64567	5.64567e-06	22018.9	0.320036	6.85178	0.132976	1.18518	0.632332	4.11441	0.36652	0.0777093	0.359224
5654.25	5.65425	5.65425e-06	21842.8	0.295017	6.57002	0.097302	1.1887	0.575571	3.741	0.467785	0.0564511	0.372059
5662.83	5.66283	5.66283e-06	21859	0.257022	6.5907	0.0905813	1.13604	0.484575	3.66645	0.733773	0.0373272	0.368677
5671.41	5.67141	5.67141e-06	21720.7	0.240192	6.75342	0.118326	1.08011	0.437558	3.75497	0.855855	0.0426987	0.271754
5679.99	5.67999	5.67999e-06	21542.1	0.212466	6.99549	0.107186	1.05048	0.497219	3.63268	0.767457	0.0694015	0.204981
5688.57	5.68857	5.68857e-06	21438.5	0.221288	7.14842	0.0886996	1.11378	0.557903	3.6729	0.642073	0.0895552	0.256694
5697.15	5.69715	5.69715e-06	21391.1	0.289492	7.64017	0.105235	1.15811	0.519983	3.77392	0.604282	0.0820922	0.326209
5705.73	5.70573	5.70573e-06	21368.5	0.403394	8.12937	0.132091	1.03589	0.479998	3.72847	0.608867	0.0543216	0.354517
5714.31	5.71431	5.71431e-06	21780.9	0.450048	7.43209	0.101189	0.981925	0.587342	3.67266	0.585294	0.0597102	0.281834
5722.89	5.72289	5.72289e-06	22150.7	0.333414	6.26787	0.0632298	1.08277	0.756832	3.69765	0.500715	0.0802709	0.160217
5731.47	5.73147	5.73147e-06	22215.8	0.210244	6.10814	0.0475976	1.23802	0.724459	3.77357	0.414808	0.0671951	0.113029
5740.05	5.74005	5.74005e-06	22120.8	0.224683	6.76076	0.0568222	1.40243	0.741395	3.72736	0.381477	0.0733197	0.17342
5748.63	5.74863	5.74863e-06	22425.6	0.288565	7.41091	0.114875	1.4232	0.816519	3.76534	0.414465	0.114607	0.272855
5757.21	5.75721	5.75721e-06	22466.4	0.281432	7.55933	0.161807	1.23377	0.783162	4.25735	0.512132	0.15371	0.323899
5765.79	5.76579	5.76579e-06	22825.8	0.32713	7.14714	0.115222	1.11023	0.610772	4.83241	0.698225	0.165898	0.315615
5774.37	5.77437	5.77437e-06	22830.6	0.363252	6.95663	0.0821177	1.18681	0.425286	5.10876	0.821161	0.118191	0.314456
5782.95	5.78295	5.78295e-06	23121.3	0.237383	6.96744	0.0948839	1.32456	0.397769	5.07812	0.672858	0.0561558	0.330687
5791.53	5.79154	5.79154e-06	23084	0.136429	6.95362	0.0972999	1.28814	0.488071	4.79236	0.513146	0.0247712	0.311956
5800.11	5.80011	5.80011e-06	22569.6	0.172378	7.36802	0.0936497	1.1925	0.573777	4.56047	0.542134	0.0141621	0.273004
5808.69	5.80869	5.80869e-06	23000.6	0.267433	7.74104	0.0896821	1.20986	0.598455	4.6957	0.63089	0.0127616	0.253162
5817.28	5.81728	5.81728e-06	23510.4	0.384859	7.82508	0.0780022	1.31372	0.547882	4.90526	0.636341	0.0210834	0.284309
5825.85	5.82585	5.82585e-06	23133	0.412087	7.83408	0.0696921	1.45176	0.498827	4.77403	0.606822	0.0323614	0.326819
5834.44	5.83444	5.83444e-06	23155.7	0.293439	7.6771	0.0701177	1.57065	0.477749	4.38621	0.691063	0.0428602	0.321526
5843.02	5.84302	5.84301e-06	23077.4	0.17599	7.56619	0.0969603	1.77242	0.46844	4.20974	0.868537	0.0527461	0.356646
5851.59	5.85159	5.85159e-06	23112.8	0.11302	7.49134	0.159477	1.9125	0.536952	4.37153	0.942671	0.0479921	0.381066
5860.18	5.86017	5.86018e-06	23390.9	0.124113	7.28816	0.213393	1.78188	0.673966	4.72639	0.905982	0.0290372	0.361766
5868.76	5.86876	5.86875e-06	23327.9	0.180857	7.06339	0.198225	1.44319	0.750119	4.82313	0.876475	0.0255264	0.353901
5877.34	5.87734	5.87734e-06	23599.4	0.190485	7.08144	0.132218	1.2754	0.708693	4.6725	0.770389	0.0369644	0.359994
5885.91	5.88591	5.88592e-06	23487.1	0.148376	7.44738	0.102528	1.28642	0.64335	4.55441	0.604937	0.0458744	0.45128
5894.49	5.8945	5.89449e-06	23193.6	0.200123	7.90182	0.104712	1.25605	0.720939	4.4542	0.567966	0.0626455	0.544128
5903.07	5.90308	5.90308e-06	23095.5	0.351542	7.47806	0.119222	1.08749	0.792447	4.46382	0.609091	0.0711191	0.622711
5911.65	5.91165	5.91165e-06	23033.8	0.439917	6.69233	0.13186	0.953305	0.767195	4.45248	0.658954	0.0530296	0.594973
5920.24	5.92024	5.92024e-06	23435.9	0.374163	6.28998	0.152597	1.07928	0.786134	4.63357	0.778855	0.0436801	0.408476
5928.82	5.92882	5.92882e-06	22487.8	0.266878	6.25442	0.121581	1.26489	0.770361	4.83457	0.899583	0.0527676	0.278757
5937.39	5.93739	5.93739e-06	22417	0.282613	6.26877	0.0562369	1.20493	0.672967	4.77784	1.00459	0.0680403	0.272298
5945.98	5.94598	5.94598e-06	21730.1	0.38472	6.33151	0.0239004	1.07718	0.561174	4.26689	0.927824	0.111572	0.295666
5954.56	5.95456	5.95456e-06	21455.2	0.44367	6.30881	0.0154118	0.978064	0.47313	3.55056	0.678188	0.157229	0.304017
5963.14	5.96314	5.96314e-06	21205.2	0.455352	5.97508	0.0149493	0.855066	0.414721	3.26764	0.587775	0.118043	0.222487
5971.72	5.97172	5.97172e-06	21222.3	0.454759	5.60584	0.0305963	0.84412	0.397243	3.45108	0.709456	0.0568897	0.0998122
5980.3	5.9803	5.9803e-06	21021.5	0.33566	5.61342	0.0876147	1.00862	0.385661	3.64354	0.820107	0.0649058	0.0773843
5988.88	5.98888	5.98888e-06	21760.4	0.189423	5.93742	0.156749	1.27061	0.347968	3.79926	0.799579	0.121273	0.17848
5997.46	5.99746	5.99746e-06	22269.3	0.187165	6.49217	0.150535	1.44939	0.359083	3.92024	0.752016	0.153442	0.300974
6006.04	6.00604	6.00604e-06	22370.3	0.247946	6.79439	0.0864444	1.36508	0.367495	3.92142	0.742243	0.123248	0.314789
6014.62	6.01462	6.01462e-06	22410.3	0.258435	6.6595	0.0697418	1.10896	0.410991	3.92643	0.904973	0.0624188	0.258441
6023.2	6.0232	6.0232e-06	22569.5	0.281687	6.787	0.113849	1.04926	0.518723	3.95321	1.10374	0.0342504	0.288301
6031.78	6.03178	6.03178e-06	22724.4	0.263896	7.72278	0.177533	1.13956	0.567244	4.06503	1.07634	0.0509524	0.346729
6040.36	6.04036	6.04036e-06	22623.6	0.206495	8.58529	0.200181	1.31329	0.558408	4.34165	0.830503	0.072757	0.315505
6048.94	6.04894	6.04894e-06	22397.8	0.250415	8.27203	0.145379	1.49479	0.562175	4.50884	0.652718	0.0621932	0.228546
6057.52	6.05752	6.05752e-06	21966.7	0.416388	7.71669	0.0942545	1.52139	0.530624	4.38846	0.582709	0.0528814	0.188344
6066.1	6.0661	6.0661e-06	21646.7	0.465535	7.75159	0.0921776	1.51679	0.505421	4.11914	0.555285	0.0445345	0.242405
6074.68	6.07468	6.07468e-06	22261.3	0.26737	7.69865	0.140058	1.51486	0.522939	4.056	0.482979	0.0333217	0.323193
6083.26	6.08326	6.08326e-06	22653.2	0.150483	7.52649	0.165598	1.43697	0.52159	4.02152	0.445339	0.0503506	0.348989
6091.84	6.09184	6.09184e-06	22877.9	0.236617	7.75083	0.119139	1.34045	0.65284	3.94406	0.480552	0.104871	0.321497
6100.42	6.10042	6.10042e-06	22532.9	0.344038	7.56666	0.0566478	1.31468	0.838377	4.16064	0.504026	0.141753	0.290656
6109	6.109	6.109e-06	21197.7	0.372266	6.89115	0.047266	1.37905	0.883322	4.30814	0.503763	0.118953	0.201441
6117.58	6.11758	6.11758e-06	20860.7	0.352758	6.22133	0.0727702	1.38079	0.741356	3.90924	0.516863	0.0814612	0.126275
6126.16	6.12616	6.12616e-06	19866.3	0.349249	5.66985	0.0960541	1.30247	0.599163	3.28415	0.592166	0.0727215	0.145952
6134.74	6.13474	6.13474e-06	20305.2	0.415154	5.3776	0.103266	1.37867	0.543883	3.21665	0.743195	0.0582423	0.174315
6143.32	6.14332	6.14332e-06	21335.6	0.490302	5.91711	0.0672673	1.45419	0.461972	3.5731	0.799108	0.0325746	0.152666
6151.9	6.1519	6.1519e-06	21542.2	0.47552	6.63439	0.0631791	1.37389	0.429678	3.69727	0.712678	0.0322527	0.142349
6160.48	6.16048	6.16048e-06	21258.5	0.380525	6.79628	0.091602	1.44067	0.471647	3.65717	0.58557	0.0624168	0.184315
6169.06	6.16906	6.16906e-06	21752.8	0.298618	6.72168	0.0842907	1.50605	0.414338	3.51457	0.56136	0.0963882	0.23919
6177.64	6.17764	6.17764e-06	21056.9	0.34751	6.62617	0.0803683	1.28971	0.368906	3.38269	0.5727	0.0963923	0.266728
6186.22	6.18622	6.18622e-06	21174.4	0.427652	6.72364	0.0728795	0.984271	0.423552	3.25373	0.568506	0.0524057	0.213871
6194.8	6.1948	6.1948e-06	20713.1	0.402399	6.85931	0.0472118	0.885113	0.477859	3.0359	0.621496	0.0218976	0.141878
6203.38	6.20338	6.20338e-06	20963.9	0.356338	6.58628	0.040632	0.761301	0.630379	3.1889	0.701361	0.0410687	0.1161
6211.96	6.21196	6.21196e-06	20344.7	0.353498	5.878	0.0635302	0.509066	0.813163	3.37719	0.675103	0.0872008	0.151532
6220.54	6.22054	6.22054e-06	18980.4	0.417428	5.17858	0.0985625	0.280421	0.847646	2.9798	0.528794	0.0946633	0.21543
6229.12	6.22912	6.22912e-06	17657	0.528571	4.38912	0.106686	0.130531	0.776468	2.24802	0.392642	0.0546652	0.204372
6237.7	6.2377	6.2377e-06	17253.2	0.624689	3.63035	0.0754396	0.0741774	0.768053	1.78515	0.306433	0.0410865	0.155273
6246.28	6.24628	6.24628e-06	17571.1	0.599226	3.51927	0.0360789	0.0831812	0.852719	1.68922	0.193542	0.0554077	0.133157
6254.86	6.25486	6.25486e-06	17149.1	0.580895	3.81178	0.0271641	0.11386	0.975256	1.60349	0.123292	0.0489985	0.11428
6263.44	6.26344	6.26344e-06	15805.3	0.690102	3.64194	0.0700905	0.111299	0.880471	1.31717	0.087939	0.0547595	0.113856
6272.02	6.27202	6.27202e-06	15352.7	0.872418	2.9751	0.155981	0.0864763	0.597219	1.04121	0.0457023	0.0707086	0.0946729
6280.6	6.2806	6.2806e-06	15388.2	1.07307	2.40939	0.212708	0.0476601	0.40484	0.879048	0.0477573	0.0457586	0.0504377
6289.18	6.28918	6.28918e-06	15939.4	1.10463	2.14965	0.196826	0.0503207	0.379305	0.879437	0.126851	0.0248218	0.0491077
6297.76	6.29776	6.29776e-06	16265.2	0.950894	2.04856	0.156779	0.179872	0.418367	0.959565	0.207852	0.0316858	0.0796562
6306.34	6.30634	6.30634e-06	16374.6	0.733987	2.0624	0.118572	0.324701	0.474592	0.996889	0.229894	0.0417991	0.0854527
6314.92	6.31492	6.31492e-06	16665.6	0.603734	2.27358	0.0625595	0.25464	0.501063	1.11441	0.261629	0.0428784	0.0716367
6323.5	6.3235	6.3235e-06	16514.5	0.576292	2.5155	0.0299993	0.109007	0.45655	1.29014	0.298832	0.0245138	0.0394822
6332.08	6.33208	6.33208e-06	16582.3	0.697119	2.71151	0.0400526	0.068342	0.35358	1.40306	0.332499	0.00822447	0.0299126
6340.66	6.34066	6.34066e-06	16838.2	0.953164	2.92458	0.0582892	0.106546	0.325424	1.50415	0.317123	0.00974673	0.0845145
6349.24	6.34924	6.34924e-06	16969	1.08635	2.91379	0.0563504	0.155001	0.361402	1.56056	0.276966	0.0333568	0.158003
6357.82	6.35782	6.35782e-06	16708.5	1.05901	2.79796	0.0463688	0.189473	0.446981	1.38578	0.225306	0.0673578	0.160493
6366.4	6.3664	6.3664e-06	16928.8	1.07567	2.88054	0.0317824	0.19539	0.511677	1.05015	0.128861	0.0841636	0.13022
6374.98	6.37498	6.37498e-06	16552	1.11422	3.15356	0.0441944	0.204458	0.477251	0.943032	0.0911351	0.0810771	0.140502
6383.56	6.38356	6.38356e-06	16628.7	1.12653	3.28361	0.0869291	0.187193	0.395285	1.01821	0.182682	0.070555	0.146807
6392.14	6.39214	6.39214e-06	16096.3	1.1543	3.01932	0.103844	0.120933	0.282291	1.09151	0.281193	0.0770451	0.093983
6400.72	6.40072	6.40072e-06	15918.3	1.20777	2.60382	0.0801831	0.0640979	0.188771	1.07712	0.244185	0.0729395	0.0553628
6409.3	6.4093	6.4093e-06	15813.2	1.19962	2.43383	0.0611067	0.0463311	0.179486	1.04984	0.152211	0.0613559	0.0872873
6417.88	6.41788	6.41788e-06	15597.3	1.12301	2.50854	0.0895141	0.0714242	0.322229	1.09746	0.0809267	0.0603334	0.17077
6426.46	6.42646	6.42646e-06	15659	0.975531	2.66563	0.121101	0.123876	0.527328	1.1323	0.103527	0.0437962	0.201286
6435.04	6.43504	6.43504e-06	15804.6	0.853326	2.7708	0.114357	0.150207	0.531243	1.09316	0.222331	0.0260492	0.113708
6443.62	6.44362	6.44362e-06	15969.7	0.778849	2.67573	0.115477	0.130484	0.3734	1.11562	0.289355	0.0129987	0.0370146
6452.2	6.4522	6.4522e-06	16375.2	0.738112	2.75968	0.107375	0.166572	0.272066	1.19881	0.291191	0.00607582	0.0357325
6460.78	6.46078	6.46078e-06	16592.9	0.831452	3.21833	0.0876295	0.268593	0.28536	1.26106	0.341297	0.00777762	0.0675835
6469.36	6.46936	6.46936e-06	16682.4	0.939329	3.30323	0.0803369	0.361809	0.330399	1.18028	0.369525	0.0164506	0.0716883
6477.94	6.47794	6.47794e-06	16639.3	0.920974	3.01512	0.0863832	0.394903	0.33286	1.04242	0.391425	0.0310725	0.0482449
6486.52	6.48652	6.48652e-06	16658.8	1.10071	3.03871	0.102134	0.374954	0.347127	1.10793	0.430901	0.0533043	0.0580835
6495.1	6.4951	6.4951e-06	16584.2	1.28513	3.19066	0.0883395	0.365062	0.440111	1.19827	0.4259	0.0689894	0.0927103
6503.68	6.50368	6.50368e-06	16487.3	1.16987	3.10601	0.0794999	0.409259	0.509612	1.0521	0.402427	0.044965	0.106039
6512.26	6.51226	6.51226e-06	16420.4	1.07348	3.02004	0.0779206	0.448926	0.483529	0.870894	0.34255	0.0307327	0.117567
6520.84	6.52084	6.52084e-06	16624.5	1.11455	3.16758	0.061018	0.391974	0.434924	0.768822	0.328183	0.0635976	0.149023
6529.42	6.52942	6.52942e-06	16697.9	1.17337	3.4046	0.0620565	0.279375	0.400255	0.791767	0.399386	0.0966909	0.158178
6538	6.538	6.538e-06	16805.2	1.1025	3.55476	0.0702842	0.244007	0.318148	0.94339	0.39547	0.102111	0.0999842
6546.58	6.54658	6.54658e-06	16683.2	0.888842	3.77022	0.0680493	0.263742	0.19547	1.1499	0.379939	0.102713	0.0446145
6555.16	6.55516	6.55516e-06	16959.9	0.920732	3.72663	0.102758	0.31828	0.192429	1.35213	0.433223	0.0739605	0.0520264
6563.74	6.56374	6.56374e-06	17570.5	1.02247	3.61586	0.181568	0.377345	0.356433	1.47287	0.479035	0.0712138	0.108159
6572.32	6.57232	6.57232e-06	17446.5	0.935135	3.75145	0.196656	0.349655	0.534193	1.63106	0.542984	0.0987938	0.13542
6580.9	6.5809	6.5809e-06	17320.6	0.825844	3.67122	0.139912	0.311656	0.536195	1.66361	0.548628	0.0805452	0.0904161
6589.48	6.58948	6.58948e-06	17102.7	0.770291	3.50919	0.102686	0.270413	0.423295	1.63327	0.399832	0.0355994	0.0434935
6598.06	6.59806	6.59806e-06	17019.3	0.89394	3.55802	0.0707096	0.22415	0.407087	1.8034	0.286148	0.0132534	0.048705
6606.64	6.60664	6.60664e-06	16713.5	1.07643	3.7043	0.0456503	0.203106	0.454982	1.96262	0.316828	0.00782894	0.0748319
6615.22	6.61522	6.61522e-06	16884.1	0.908735	3.82337	0.0432137	0.244498	0.491245	1.87212	0.434053	0.00657354	0.0819077
6623.8	6.6238	6.6238e-06	17096.1	0.754685	4.02747	0.0441693	0.261769	0.566939	1.73111	0.438559	0.00751653	0.110417
6632.38	6.63238	6.63238e-06	17093	0.867611	3.98846	0.0607879	0.209821	0.547312	1.68637	0.405173	0.0130788	0.162312
6640.96	6.64096	6.64096e-06	17021.8	0.939806	3.8018	0.0936457	0.179268	0.418722	1.65056	0.502959	0.0204339	0.150078
6649.54	6.64954	6.64954e-06	16930	0.71629	3.73231	0.128816	0.225967	0.360419	1.65602	0.596614	0.0183342	0.124326
6658.12	6.65812	6.65812e-06	17127.8	0.60565	3.76222	0.146861	0.28014	0.372067	1.69115	0.534797	0.0186842	0.144345
6666.7	6.6667	6.6667e-06	17506.8	0.730167	3.57837	0.145433	0.265738	0.384514	1.84099	0.388565	0.0477643	0.169604
6675.28	6.67528	6.67528e-06	17509.8	0.799649	3.31359	0.143963	0.267402	0.420024	2.01486	0.311085	0.0922281	0.156802
6683.86	6.68386	6.68386e-06	17972.5	0.83511	3.35323	0.164614	0.30075	0.476112	2.01837	0.349204	0.0920137	0.111738
6692.44	6.69244	6.69244e-06	18143.3	0.917775	3.42401	0.195072	0.307646	0.515468	2.09827	0.418627	0.0489011	0.0953906
6701.02	6.70102	6.70102e-06	18439.3	0.843879	3.53096	0.21334	0.264926	0.495335	2.19765	0.536607	0.0227293	0.118104
6709.6	6.7096	6.7096e-06	18607.4	0.585606	3.57893	0.197693	0.23874	0.464405	2.02501	0.604341	0.0394401	0.145104
6718.18	6.71818	6.71818e-06	18592.9	0.493202	3.57599	0.168267	0.221757	0.587137	1.88003	0.514418	0.061162	0.168647
6726.76	6.72676	6.72676e-06	18300	0.684048	3.7527	0.152214	0.203852	0.837892	2.05548	0.411352	0.0487001	0.1829
6735.34	6.73534	6.73534e-06	18128.1	0.942586	4.02882	0.0971843	0.194724	0.982521	2.1268	0.359524	0.0595994	0.163105
6743.92	6.74392	6.74392e-06	18082.5	0.943141	4.00972	0.054233	0.192342	1.01503	1.95823	0.364429	0.0938636	0.129096
6752.5	6.7525	6.7525e-06	17830.4	0.816053	3.70008	0.0425652	0.167005	0.917219	1.90559	0.394923	0.0880271	0.135657
6761.08	6.76108	6.76108e-06	17867.4	0.853723	3.87368	0.0394407	0.0929725	0.745507	1.88954	0.437348	0.0947997	0.151446
6769.66	6.76966	6.76966e-06	17810	1.01803	4.07784	0.0534715	0.0773834	0.734607	1.93494	0.438175	0.139	0.183913
6778.24	6.77824	6.77824e-06	17949.2	1.13731	3.75275	0.070893	0.166696	0.856297	2.08807	0.350335	0.146546	0.214998
6786.82	6.78682	6.78682e-06	18017.5	0.999425	3.59329	0.073059	0.262899	0.790399	2.23855	0.308735	0.111123	0.22129
6795.4	6.7954	6.7954e-06	17996.8	0.839086	3.68863	0.059529	0.293756	0.590966	2.15192	0.348224	0.0739126	0.250236
6803.98	6.80398	6.80398e-06	17677.8	0.633601	3.59742	0.0539888	0.305999	0.428074	1.99976	0.390597	0.055119	0.198838
6812.56	6.81256	6.81256e-06	17877.1	0.526473	3.41199	0.0669882	0.284989	0.453631	2.07696	0.353834	0.038392	0.0943463
6821.14	6.82114	6.82114e-06	17740.7	0.558241	3.37428	0.0857647	0.188211	0.641617	1.98241	0.284889	0.0280432	0.077947
6829.72	6.82972	6.82972e-06	17555.6	0.662947	3.35561	0.0693535	0.108602	0.829007	1.72997	0.306652	0.02456	0.142159
6838.3	6.8383	6.8383e-06	17543.9	0.828232	3.22807	0.061594	0.0927655	0.920039	1.81036	0.385456	0.0350214	0.16098
6846.88	6.84688	6.84688e-06	17180.8	0.832409	3.1915	0.0771333	0.0912814	0.923638	2.19888	0.458712	0.0479639	0.108062
6855.46	6.85546	6.85546e-06	17622.1	0.833647	3.6598	0.0742124	0.0746104	0.884535	2.55149	0.51172	0.0432539	0.0830148
6864.04	6.86404	6.86404e-06	18316.9	0.835922	4.55667	0.0674581	0.0606124	0.926276	2.8009	0.487306	0.0365498	0.125417
6872.62	6.87262	6.87262e-06	19209.4	0.651642	5.0478	0.0426133	0.107155	1.21824	2.86241	0.432727	0.0246395	0.16368
6881.2	6.8812	6.8812e-06	19806.3	0.449062	5.5348	0.018979	0.173673	1.59002	2.72807	0.38113	0.0152631	0.12306
6889.78	6.88978	6.88978e-06	19972.1	0.370535	6.21085	0.0317024	0.141504	1.89332	2.67468	0.382207	0.00988371	0.0775768
6898.36	6.89836	6.89836e-06	20956.5	0.388502	6.555	0.0746042	0.0711891	2.16697	2.93441	0.431921	0.00711793	0.0644002
6906.94	6.90694	6.90694e-06	20483.9	0.433825	6.33743	0.10559	0.0409364	2.37257	3.13428	0.41623	0.0119923	0.0950652
6915.52	6.91552	6.91552e-06	19741.6	0.389149	5.99223	0.101825	0.0696533	2.25358	2.9468	0.339234	0.0207271	0.157157
6924.1	6.9241	6.9241e-06	18973.9	0.30188	6.0527	0.106802	0.124479	2.12332	2.58931	0.294305	0.0308519	0.156004

## Sheet: Fig.5
Glass properties				r+, geo dependance on SiO2 [wt%]
Density	2.4	[g/cm3]			pH4	pH10.6
molecular weight	76.26	[g mol-1]		coefficients	-0.03	-0.02
molar volume	31.775	[cm3 mol-1]			-7.58	-7.02
	3.1775e-05	[m3 mol-1]
depositional age	3445	[yr B.P.]		Conversion of cited dissolution rates
	4516	[yr B.P.]		Log r+, geo [g m-2 d-1]	-1.7	-2.1
averaged depositional age	3980.5	[yr B.P.]		Log r+, geo [g m-2 s-1]	-6.63651	-7.03651
maximum radius	40	[um]		Log r+, geo [mol m-2 s-1]	-8.51881	-8.91881
References	Wolef-Boenisch et al. (2004)		Vienna et al. (2018)		Yokoyama & Banfield (2002)		This study
pH	4	10.6	11.2	9.5	6.5-7.0?	6.5-7.0?	11.16
SiO2[wt%]	78	78	43	43	77.5-79.0	77.5-79.0	78
Log r+, geo [mol m-2 s-1]	-9.92	-8.58	-8.51881	-8.91881	-13.2218	-12.2218	-11.06
Radius [um]	Wolef-Boenisch et al. 2004 pH4	Wolef-Boenisch et al. 2004 pH 10.6	Vienna et al. 2018	Vienna et al. 2018 at pH 9.5	Yokoyama & Banfield 2002 field roughness 10	Yokoyama & Banfield 2002 field roughness 100	This study
10	83.0057	3.79409	3.29548	8.27787	166325	16632.5	1145.8
20	166.011	7.58818	6.59096	16.5557	332649	33264.9	2291.59
50	415.028	18.9705	16.4774	41.3893	831623	83162.3	5728.99
100	830.057	37.9409	32.9548	82.7787	1.66325e+06	166325	11458
200	1660.11	75.8818	65.9096	165.557	3.32649e+06	332649	22915.9
500	4150.28	189.705	164.774	413.893	8.31623e+06	831623	57289.9
1000	8300.57	379.409	329.548	827.787	1.66325e+07	1.66325e+06	114580
2000	16601.1	758.818	659.096	1655.57	3.32649e+07	3.32649e+06	229159
5000	41502.8	1897.05	1647.74	4138.93	8.31623e+07	8.31623e+06	572899

## Sheet: Supplementary Table1
Date	201216			201031				201106
analysis #	Spc_002	Spc_003	Spc_004	Spc_011	Spc_012	Spc_013	Spc_014	Spc_012	Spc_008	Spc_002
Vacc [kV]	15	15	15	15	15	15	15	15	15	15
WD [mm]	10.2	10.2	10.2	10.2	10.2	10.2	10.2	10.2	10.2	10.2
Magnification	x 750	x 750	x 750	x 250	x 250	x 250	x 750	x 1200	x 450	x 500
Process time	T3	T3	T3	T3	T3	T3	T3	T3	T3	T3
Live time [s]	30	30	30	30	30	30	30	30	30	30
Real time [s]	33.56	33.71	33.61	33.69	33.73	33.71	32.81	33.57	33.63	33.65
Dead time [%]	11	11	11	11	11	11	8	11	11	11
Count rate [cps]	21024	21330	20712	21498	21737	21430	16183	21030	20646	21261
Chemical composition of glass
wt%											Ave.	Stdev.
Na2O	2.58	2.59	2.76	2.59	2.7	2.8	2.69	2.43	2.53	2.57	2.624	0.106414
MgO	0.21	0.18	0.22	0.18	0	0.09	0.21	0.38	0.28	0.19	0.194	0.0959375
Al2O3	13.84	13.95	13.83	13.79	13.93	13.79	13.91	13.88	13.58	14.14	13.864	0.135514
SiO2	78.81	77.91	78.47	77.8	78.8	78.75	78.73	77.18	77.89	78.6	78.294	0.532977
K2O	3.15	2.92	3.39	3.08	3.33	3.36	3.16	2.7	2.96	3.34	3.139	0.215752
CaO	1.27	1.32	1.25	1.31	1.24	1.19	1.3	1.92	1.38	1.16	1.334	0.204558
Fe2O3	0	1.15	0	1.25	0	0	0	1.5	1.39	0	0.529	0.653352
Total	99.86	100.02	99.92	100	100	99.98	100	99.99	100.01	100	99.978

## Sheet: Supplementary Table2
STEM-EDS quantitative analysis
Area#1
Z	Element	Family	Net intensity	Net background	K-factor	Absorption correction	Atomic fraction	Mass fraction	Fit error		Atomic fraction	Area#1	Area#2	Area#3	Area#4
-	-	-	counts	counts	-	-	%	%	%		O	62.5907	64.032	64.8533	63.9515
8	O	K	2080.68	4.83053	1	1	62.5907	48.2983	0.544816		Mg	1.15558	4.80771	2.26653	0.86885
12	Mg	K	62.3578	17.0796	0.935833	1	1.15558	1.35461	7.77634		Al	14.642	4.76972	4.46062	15.2962
13	Al	K	858.322	19.7868	0.956332	1	14.642	19.0539	1.5198		Si	19.7532	22.1491	18.9766	18.0356
14	Si	K	1213.63	22.812	0.949784	1	19.7532	26.757	1.65292		Ca	0.617857	0.912112	1.12963	0.624122
20	Ca	K	49.3139	49.9588	1.04332	1	0.617857	1.1943	8.62173		Fe	1.24077	3.32933	8.31333	1.22378
26	Fe	K	98.2676	49.3987	1.46507	1	1.24077	3.34191	5.44159		cation total	37.4094	35.968	35.1467	36.0486
Area#2											Al/Si	0.741247	0.215346	0.235059	0.848112
Z	Element	Family	Net intensity	Net background	K-factor	Absorption correction	Atomic fraction	Mass fraction	Fit error
-	-	-	counts	counts	-	-	%	%	%		valence
8	O	K	1493.69	1.63279	1	1	64.032	48.4483	0.595893		Mg	2	2
12	Mg	K	182.052	5.77318	0.935833	1	4.80771	5.52602	2.90797		Al	3	3
13	Al	K	196.205	6.68825	0.956332	1	4.76972	6.08608	2.4459		Si	4	4
14	Si	K	954.931	7.71083	0.949784	1	22.1491	29.4182	1.04277		Ca	2	2
20	Ca	K	51.0853	16.6789	1.04332	1	0.912112	1.72875	6.6914		Fe	3	2
26	Fe	K	185.03	28.6267	1.46507	1	3.32933	8.79264	3.073			Area#1	Area#2	Area#3	Area#4			Area#1	Area#2	Area#3	Area#4
Area#3											total cation charge	130.208	124.333	121.021	124.688			128.967	121.004	112.707	123.465
Z	Element	Family	Net intensity	Net background	K-factor	Absorption correction	Atomic fraction	Mass fraction	Fit error
-	-	-	counts	counts	-	-	%	%	%		O	11	11	11	11		O	11	11	11	11
8	O	K	1575.5	3.8579	1	1	64.8533	46.0026	0.877203		Mg	0.195247	0.850695	0.412026	0.1533		Mg	0.197126	0.874101	0.442418	0.154819
12	Mg	K	89.3804	13.6406	0.935833	1	2.26653	2.44233	7.77075		Al	2.47392	0.843973	0.810884	2.69886		Al	2.49772	0.867194	0.870695	2.72561
13	Al	K	191.089	15.8027	0.956332	1	4.46062	5.33591	3.10778		Si	3.33751	3.91915	3.4497	3.1822		Si	3.36962	4.02698	3.70416	3.21374
14	Si	K	852.035	18.2188	0.949784	1	18.9766	23.629	1.34012		Ca	0.104393	0.161393	0.205352	0.11012		Ca	0.105398	0.165833	0.220499	0.111212
20	Ca	K	65.8881	41.1671	1.04332	1	1.12963	2.00719	6.86408		Fe3+	0.209641	0.589105	1.51126	0.215924		Fe2+	0.211658	0.605313	1.62273	0.218064
26	Fe	K	481.153	45.8053	1.46507	1	8.31333	20.5829	1.32492
Area#4											Structural formula on the basis of O10(OH)2
Z	Element	Family	Net intensity	Net background	K-factor	Absorption correction	Atomic fraction	Mass fraction	Fit error		Si	3.33751	3.91915	3.4497	3.1822		Si	3.36962	4.02698	3.70416	3.21374
-	-	-	counts	counts	-	-	%	%	%		[IV]Al	0.66249	0.0808519	0.550296	0.817799		[IV]Al	0.630381	0	0.295844	0.786257
8	O	K	2199.35	7.15687	1	1	63.9515	49.7438	0.334191		[VI]Al	1.81143	0.763121	0.260588	1.88106		[VI]Al	1.86734	0.867194	0.574851	1.93936
12	Mg	K	48.5044	25.305	0.935833	1	0.86885	1.02666	8.20256		Fe3+	0.209641	0.589105	1.51126	0.215924		Fe2+	0.211658	0.605313	1.62273	0.218064
13	Al	K	927.642	29.3158	0.956332	1	15.2962	20.0648	0.889177		Mg	0.195247	0.850695	0.412026	0.1533		Mg	0.197126	0.874101	0.442418	0.154819
14	Si	K	1146.37	33.798	0.949784	1	18.0356	24.6261	0.716686		Σoct	2.21632	2.20292	2.18387	2.25029		Σoct	2.27612	2.34661	2.64	2.31224
20	Ca	K	51.5344	50.2621	1.04332	1	0.624122	1.21607	7.36179		Ca	0.104393	0.161393	0.205352	0.11012		Ca	0.105398	0.165833	0.220499	0.111212
26	Fe	K	100.269	46.4537	1.46507	1	1.22378	3.32255	3.97707

## Sheet: Supplementary  Fig.2
		Area#1				Area#2				Area#3				Area#4
		Spetrum	Bkg	Model	Residual	Spetrum	Bkg	Model	Residual	Spetrum	Bkg	Model	Residual	Spetrum	Bkg	Model	Residual
Energy	Energy	Intensity	Intensity	Intensity	Intensity	Intensity	Intensity	Intensity	Intensity	Intensity	Intensity	Intensity	Intensity	Intensity	Intensity	Intensity	Intensity
keV	eV	Counts	Counts	Counts	Counts	Counts	Counts	Counts	Counts	Counts	Counts	Counts	Counts	Counts	Counts	Counts	Counts
-0.953496	-953.496	0	0	0	0	0	0	0	0	0	0	0	0	0	0	0	0
-0.943496	-943.496	0	0	0	0	0	0	0	0	0	0	0	0	0	0	0	0
-0.933496	-933.496	0	0	0	0	0	0	0	0	0	0	0	0	0	0	0	0
-0.923496	-923.496	0	0	0	0	0	0	0	0	0	0	0	0	0	0	0	0
-0.913496	-913.496	0	0	0	0	0	0	0	0	0	0	0	0	0	0	0	0
-0.903496	-903.496	0	0	0	0	0	0	0	0	0	0	0	0	0	0	0	0
-0.893496	-893.496	0	0	0	0	0	0	0	0	0	0	0	0	0	0	0	0
-0.883496	-883.496	0	0	0	0	0	0	0	0	0	0	0	0	0	0	0	0
-0.873496	-873.496	0	0	0	0	0	0	0	0	0	0	0	0	0	0	0	0
-0.863496	-863.496	0	0	0	0	0	0	0	0	0	0	0	0	0	0	0	0
-0.853496	-853.496	0	0	0	0	0	0	0	0	0	0	0	0	0	0	0	0
-0.843496	-843.496	0	0	0	0	0	0	0	0	0	0	0	0	0	0	0	0
-0.833496	-833.496	0	0	0	0	0	0	0	0	0	0	0	0	0	0	0	0
-0.823496	-823.496	0	0	0	0	0	0	0	0	0	0	0	0	0	0	0	0
-0.813496	-813.496	0	0	0	0	0	0	0	0	0	0	0	0	0	0	0	0
-0.803496	-803.496	0	0	0	0	0	0	0	0	0	0	0	0	0	0	0	0
-0.793496	-793.496	0	0	0	0	0	0	0	0	0	0	0	0	0	0	0	0
-0.783496	-783.496	0	0	0	0	0	0	0	0	0	0	0	0	0	0	0	0
-0.773496	-773.496	0	0	0	0	0	0	0	0	0	0	0	0	0	0	0	0
-0.763496	-763.496	0	0	0	0	0	0	0	0	0	0	0	0	0	0	0	0
-0.753496	-753.496	0	0	0	0	0	0	0	0	0	0	0	0	0	0	0	0
-0.743496	-743.496	0	0	0	0	0	0	0	0	0	0	0	0	0	0	0	0
-0.733496	-733.496	0	0	0	0	0	0	0	0	0	0	0	0	0	0	0	0
-0.723496	-723.496	0	0	0	0	0	0	0	0	0	0	0	0	0	0	0	0
-0.713496	-713.496	0	0	0	0	0	0	0	0	0	0	0	0	0	0	0	0
-0.703496	-703.496	0	0	0	0	0	0	0	0	0	0	0	0	0	0	0	0
-0.693496	-693.496	0	0	0	0	0	0	0	0	0	0	0	0	0	0	0	0
-0.683496	-683.496	0	0	0	0	0	0	0	0	0	0	0	0	0	0	0	0
-0.673496	-673.496	0	0	0	0	0	0	0	0	0	0	0	0	0	0	0	0
-0.663496	-663.496	0	0	0	0	0	0	0	0	0	0	0	0	0	0	0	0
-0.653496	-653.496	0	0	0	0	0	0	0	0	0	0	0	0	0	0	0	0
-0.643496	-643.496	0	0	0	0	0	0	0	0	0	0	0	0	0	0	0	0
-0.633496	-633.496	0	0	0	0	0	0	0	0	0	0	0	0	0	0	0	0
-0.623496	-623.496	0	0	0	0	0	0	0	0	0	0	0	0	0	0	0	0
-0.613496	-613.496	0	0	0	0	0	0	0	0	0	0	0	0	0	0	0	0
-0.603496	-603.496	0	0	0	0	0	0	0	0	0	0	0	0	0	0	0	0
-0.593496	-593.496	0	0	0	0	0	0	0	0	0	0	0	0	0	0	0	0
-0.583496	-583.496	0	0	0	0	0	0	0	0	0	0	0	0	0	0	0	0
-0.573496	-573.496	0	0	0	0	0	0	0	0	0	0	0	0	0	0	0	0
-0.563496	-563.496	0	0	0	0	0	0	0	0	0	0	0	0	0	0	0	0
-0.553496	-553.496	0	0	0	0	0	0	0	0	0	0	0	0	0	0	0	0
-0.543496	-543.496	0	0	0	0	0	0	0	0	0	0	0	0	0	0	0	0
-0.533496	-533.496	0	0	0	0	0	0	0	0	0	0	0	0	0	0	0	0
-0.523496	-523.496	0	0	0	0	0	0	0	0	0	0	0	0	0	0	0	0
-0.513496	-513.496	0	0	0	0	0	0	0	0	0	0	0	0	0	0	0	0
-0.503496	-503.496	0	0	0	0	0	0	0	0	0	0	0	0	0	0	0	0
-0.493496	-493.496	0	0	0	0	0	0	0	0	0	0	0	0	0	0	0	0
-0.483496	-483.496	0	0	0	0	0	0	0	0	0	0	0	0	0	0	0	0
-0.473496	-473.496	0	0	0	0	0	0	0	0	0	0	0	0	0	0	0	0
-0.463496	-463.496	0	0	0	0	0	0	0	0	0	0	0	0	0	0	0	0
-0.453496	-453.496	0	0	0	0	0	0	0	0	0	0	0	0	0	0	0	0
-0.443496	-443.496	0	0	0	0	0	0	0	0	0	0	0	0	0	0	0	0
-0.433496	-433.496	0	0	0	0	0	0	0	0	0	0	0	0	0	0	0	0
-0.423496	-423.496	0	0	0	0	0	0	0	0	0	0	0	0	0	0	0	0
-0.413496	-413.496	0	0	0	0	0	0	0	0	0	0	0	0	0	0	0	0
-0.403496	-403.496	0	0	0	0	0	0	0	0	0	0	0	0	0	0	0	0
-0.393496	-393.496	0	0	0	0	0	0	0	0	0	0	0	0	0	0	0	0
-0.383496	-383.496	0	0	0	0	0	0	0	0	0	0	0	0	0	0	0	0
-0.373496	-373.496	0	0	0	0	0	0	0	0	0	0	0	0	0	0	0	0
-0.363496	-363.496	0	0	0	0	0	0	0	0	0	0	0	0	0	0	0	0
-0.353496	-353.496	0	0	0	0	0	0	0	0	0	0	0	0	0	0	0	0
-0.343496	-343.496	0	0	0	0	0	0	0	0	0	0	0	0	0	0	0	0
-0.333496	-333.496	0	0	0	0	0	0	0	0	0	0	0	0	0	0	0	0
-0.323496	-323.496	0	0	0	0	0	0	0	0	0	0	0	0	0	0	0	0
-0.313496	-313.496	0	0	0	0	0	0	0	0	0	0	0	0	0	0	0	0
-0.303496	-303.496	0	0	0	0	0	0	0	0	0	0	0	0	0	0	0	0
-0.293496	-293.496	0	0	0	0	0	0	0	0	0	0	0	0	0	0	0	0
-0.283496	-283.496	0	0	0	0	0	0	0	0	0	0	0	0	0	0	0	0
-0.273496	-273.496	0	0	0	0	0	0	0	0	0	0	0	0	0	0	0	0
-0.263496	-263.496	0	0	0	0	0	0	0	0	0	0	0	0	0	0	0	0
-0.253496	-253.496	0	0	0	0	0	0	0	0	0	0	0	0	0	0	0	0
-0.243496	-243.496	0	0	0	0	0	0	0	0	0	0	0	0	0	0	0	0
-0.233496	-233.496	0	0	0	0	0	0	0	0	0	0	0	0	0	0	0	0
-0.223496	-223.496	0	0	0	0	0	0	0	0	0	0	0	0	0	0	0	0
-0.213496	-213.496	0	0	0	0	0	0	0	0	0	0	0	0	0	0	0	0
-0.203496	-203.496	0	0	0	0	0	0	0	0	0	0	0	0	0	0	0	0
-0.193496	-193.496	0	0	0	0	0	0	0	0	0	0	0	0	0	0	0	0
-0.183496	-183.496	0	0	0	0	0	0	0	0	0	0	0	0	0	0	0	0
-0.173496	-173.496	0	0	0	0	0	0	0	0	0	0	0	0	0	0	0	0
-0.163496	-163.496	0	0	0	0	0	0	0	0	0	0	0	0	0	0	0	0
-0.153496	-153.496	0	0	0	0	0	0	0	0	0	0	0	0	0	0	0	0
-0.143496	-143.496	0	0	0	0	0	0	0	0	0	0	0	0	0	0	0	0
-0.133496	-133.496	0	0	0	0	0	0	0	0	0	0	0	0	0	0	0	0
-0.123496	-123.496	0	0	0	0	0	0	0	0	0	0	0	0	0	0	0	0
-0.113496	-113.496	0	0	0	0	0	0	0	0	0	0	0	0	0	0	0	0
-0.103496	-103.496	0	0	0	0	0	0	0	0	0	0	0	0	0	0	0	0
-0.0934958	-93.4958	0	0	0	0	0	0	0	0	0	0	0	0	0	0	0	0
-0.0834958	-83.4958	0	0	0	0	0	0	0	0	0	0	0	0	0	0	0	0
-0.0734958	-73.4958	0	0	0	0	0	0	0	0	0	0	0	0	0	0	0	0
-0.0634958	-63.4958	0	0	0	0	0	0	0	0	0	0	0	0	0	0	0	0
-0.0534958	-53.4958	0	0	0	0	0	0	0	0	0	0	0	0	0	0	0	0
-0.0434958	-43.4958	0	0	0	0	0	0	0	0	0	0	0	0	0	0	0	0
-0.0334958	-33.4958	0	0	0	0	0	0	0	0	0	0	0	0	0	0	0	0
-0.0234958	-23.4958	0	0	0	0	0	0	0	0	0	0	0	0	0	0	0	0
-0.0134958	-13.4958	0	0	0	0	0	0	0	0	0	0	0	0	0	0	0	0
-0.00349584	-3.49584	0	0	0	0	0	0	0	0	0	0	0	0	0	0	0	0
0.00650416	6.50416	0	0	0	0	0	0	0	0	0	0	0	0	0	0	0	0
0.0165042	16.5042	0	0	0	0	0	0	0	0	0	0	0	0	0	0	0	0
0.0265042	26.5042	0	0	0	0	0	0	0	0	0	0	0	0	0	0	0	0
0.0365042	36.5042	0	0	0	0	0	0	0	0	0	0	0	0	0	0	0	0
0.0465042	46.5042	0	0	0	0	0	0	0	0	0	0	0	0	0	0	0	0
0.0565042	56.5042	0	0	0	0	0	0	0	0	0	0	0	0	0	0	0	0
0.0665042	66.5042	0	0	0	0	0	0	0	0	0	0	0	0	0	0	0	0
0.0765042	76.5042	0	0	0	0	0	0	0	0	0	0	0	0	0	0	0	0
0.0865042	86.5042	0	0	0	0	0	0	0	0	0	0	0	0	0	0	0	0
0.0965042	96.5042	0	0	0	0	0	0	0	0	0	0	0	0	0	0	0	0
0.106504	106.504	0	0	0	0	0	0	0	0	0	0	0	0	0	0	0	0
0.116504	116.504	0	0	0	0	0	0	0	0	0	0	0	0	0	0	0	0
0.126504	126.504	0	0	0	0	0	0	0	0	0	0	0	0	0	0	0	0
0.136504	136.504	0	0	0	0	0	0	0	0	0	0	0	0	0	0	0	0
0.146504	146.504	0	0	0	0	0	0	0	0	0	0	0	0	0	0	0	0
0.156504	156.504	6	0.500833	15.5152	-9.51515	7	0.169289	8.52344	-1.52344	4	0.39999	5.75553	-1.75553	1	0.74203	5.277	-4.277
0.166504	166.504	7	0.505345	14.196	-7.19603	2	0.170814	7.78848	-5.78848	4	0.403594	5.287	-1.287	0	0.748715	4.88389	-4.88389
0.176504	176.504	6	0.509857	11.3473	-5.3473	5	0.17234	6.19718	-1.19718	1	0.407197	4.26869	-3.26869	6	0.7554	4.02206	1.97794
0.186504	186.504	5	0.514369	8.0767	-3.0767	8	0.173865	4.36146	3.63854	6	0.410801	3.09218	2.90782	8	0.762085	3.02041	4.97959
0.196504	196.504	16	0.518881	5.63166	10.3683	4	0.17539	2.95249	1.04751	4	0.414405	2.18419	1.81581	8	0.76877	2.22638	5.77362
0.206504	206.504	23	0.523393	5.10585	17.8941	6	0.176915	2.52845	3.47155	4	0.418008	1.89471	2.10529	7	0.775455	1.90585	5.09415
0.216504	216.504	19	0.527905	7.63561	11.3644	11	0.17844	3.62729	7.37271	9	0.421611	2.55398	6.44602	6	0.78214	2.28134	3.71866
0.226504	226.504	34	0.532417	14.6052	19.3948	26	0.179965	6.88381	19.1162	10	0.425215	4.5479	5.4521	3	0.788825	3.59758	-0.597576
0.236504	236.504	68	0.536929	27.2846	40.7154	22	0.18149	12.8771	9.12292	15	0.428819	8.22789	6.77211	11	0.79551	6.07492	4.92508
0.246504	246.504	82	0.541441	45.6706	36.3294	30	0.183015	21.5899	8.41009	18	0.432422	13.5805	4.41947	23	0.802195	9.69259	13.3074
0.256504	256.504	100	0.545953	67.1452	32.8548	52	0.184541	31.7718	20.2282	19	0.436026	19.8362	-0.836164	22	0.808879	13.9238	8.07619
0.266504	266.504	92	0.550465	86.328	5.67196	45	0.186066	40.8693	4.13069	33	0.439629	25.4263	7.57367	19	0.815565	17.7071	1.29287
0.276504	276.504	94	0.554977	96.9061	-2.90613	45	0.187591	45.8858	-0.885754	26	0.443233	28.51	-2.50998	18	0.822249	19.796	-1.796
0.286504	286.504	83	0.559489	94.948	-11.948	45	0.189116	44.9564	0.0435867	25	0.446836	27.9419	-2.94187	16	0.828934	19.4162	-3.41619
0.296504	296.504	69	0.564001	81.2058	-12.2058	18	0.190641	38.438	-20.4381	19	0.45044	23.9411	-4.94111	14	0.835619	16.7158	-2.71584
0.306504	306.504	47	0.568513	60.6555	-13.6555	27	0.192166	28.6907	-1.69067	16	0.454043	17.9572	-1.95716	9	0.842304	12.6748	-3.6748
0.316504	316.504	27	0.573025	39.6193	-12.6193	13	0.193691	18.7128	-5.71285	9	0.457647	11.8317	-2.83168	3	0.848989	8.53809	-5.53809
0.326504	326.504	17	0.577537	22.7063	-5.70632	8	0.195217	10.6906	-2.69062	7	0.46125	6.90729	0.0927138	3	0.855674	5.21334	-2.21334
0.336504	336.504	9	0.582049	11.5195	-2.51946	9	0.196742	5.38422	3.61578	4	0.464854	3.65088	0.349117	6	0.862359	3.01619	2.98381
0.346504	346.504	4	0.586561	5.30122	-1.30122	8	0.198267	2.43437	5.56563	9	0.468457	1.84182	7.15818	3	0.869044	1.79747	1.20253
0.356504	356.504	12	0.591073	2.36349	9.63651	9	0.199792	1.04043	7.95957	7	0.472061	0.988359	6.01164	15	0.875729	1.22476	13.7752
0.366504	366.504	12	0.595585	1.1767	10.8233	9	0.201317	0.476931	8.52307	5	0.475664	0.64494	4.35506	3	0.882414	0.996848	2.00315
0.376504	376.504	11	0.600097	0.766259	10.2337	9	0.202842	0.281651	8.71835	14	0.479268	0.52767	13.4723	4	0.889099	0.92182	3.07818
0.386504	386.504	20	0.604609	0.604609	19.3954	14	0.204367	0.204367	13.7956	15	0.482871	0.482871	14.5171	11	0.895784	0.895784	10.1042
0.396504	396.504	12	0.609121	0.609121	11.3909	12	0.205893	0.205893	11.7941	11	0.486475	0.486475	10.5135	8	0.902469	0.902469	7.09753
0.406504	406.504	15	0.613633	0.685952	14.314	11	0.207418	0.259334	10.7407	9	0.490078	0.544839	8.45516	12	0.909154	0.985597	11.0144
0.416504	416.504	15	0.618145	0.897333	14.1027	11	0.208943	0.409367	10.5906	15	0.493682	0.705084	14.2949	16	0.915839	1.21095	14.789
0.426504	426.504	13	0.622657	1.57851	11.4215	9	0.210468	0.896661	8.10334	7	0.497285	1.22106	5.77894	13	0.922524	1.93289	11.0671
0.436504	436.504	25	0.627169	3.52945	21.4705	13	0.211993	2.2955	10.7045	8	0.500889	2.69851	5.30149	18	0.929209	3.99701	14.003
0.446504	446.504	26	0.631681	8.44688	17.5531	20	0.213518	5.82392	14.1761	20	0.504493	6.42218	13.5778	33	0.935894	9.19679	23.8032
0.456504	456.504	41	0.636193	19.2996	21.7004	20	0.215043	13.6132	6.38678	32	0.508096	14.6401	17.3599	46	0.942579	20.6704	25.3296
0.466504	466.504	63	0.640705	40.1678	22.8322	39	0.216568	28.5924	10.4076	45	0.511699	30.4418	14.5582	67	0.949264	42.7306	24.2693
0.476504	476.504	97	0.645217	74.8874	22.1126	67	0.218094	53.5153	13.4847	71	0.515303	56.7317	14.2683	87	0.955949	79.4322	7.56777
0.486504	486.504	143	0.649729	124.318	18.682	102	0.219619	88.9991	13.0009	105	0.518907	94.161	10.839	154	0.962634	131.684	22.3162
0.496504	496.504	192	0.654241	183.346	8.65378	143	0.221144	131.373	11.6267	141	0.52251	138.859	2.1407	184	0.969318	194.08	-10.0803
0.506504	506.504	243	0.658753	240.009	2.99103	166	0.222669	172.05	-6.05026	194	0.526114	181.77	12.2303	253	0.976004	253.976	-0.976257
0.516504	516.504	290	0.663265	278.767	11.2331	220	0.224194	199.877	20.1225	220	0.529717	211.135	8.86481	302	0.982688	294.946	7.05414
0.526504	526.504	265	0.667777	287.25	-22.2497	186	0.225719	205.98	-19.9801	215	0.533321	217.608	-2.60823	306	0.989373	303.913	2.08731
0.536504	536.504	253	0.672289	262.609	-9.60858	187	0.227244	188.326	-1.3264	169	0.536924	199.076	-30.0763	265	0.996058	277.864	-12.8639
0.546504	546.504	208	0.676801	213.076	-5.07596	149	0.228769	152.85	-3.85004	171	0.540528	161.853	9.14667	232	1.00274	225.499	6.5013
0.556504	556.504	153	0.681313	153.593	-0.592728	97	0.230295	110.312	-13.3122	104	0.544131	117.372	-13.372	150	1.00943	162.606	-12.606
0.566504	566.504	91	0.685825	98.6416	-7.64159	71	0.23182	71.1491	-0.149056	73	0.547735	76.7308	-3.7308	99	1.01611	104.49	-5.48996
0.576504	576.504	51	0.690337	56.9082	-5.90821	32	0.233345	41.6195	-9.61946	50	0.551338	46.5861	3.41386	48	1.0228	60.3289	-12.3289
0.586504	586.504	41	0.694849	30.1879	10.8121	22	0.23487	22.995	-0.994984	18	0.554942	28.2391	-10.2391	21	1.02948	32.0225	-11.0225
0.596504	596.504	11	0.699361	15.6308	-4.63078	9	0.236395	13.1503	-4.15033	18	0.558545	19.2643	-1.26425	14	1.03617	16.5675	-2.56745
0.606504	606.504	6	0.703873	8.86217	-2.86217	4	0.23792	8.81953	-4.81953	13	0.562149	15.9259	-2.92593	6	1.04285	9.35397	-3.35397
0.616504	616.504	9	0.708385	6.12691	2.87309	6	0.239445	7.18308	-1.18308	12	0.565752	14.9636	-2.96366	3	1.04954	6.42693	-3.42693
0.626504	626.504	4	0.712897	5.05811	-1.05811	11	0.240971	6.48945	4.51055	13	0.569356	14.4086	-1.4086	5	1.05622	5.29044	-0.290443
0.636504	636.504	5	0.717409	4.40463	0.595375	4	0.242496	5.90878	-1.90878	11	0.572959	13.5437	-2.54367	3	1.06291	4.6142	-1.6142
0.646504	646.504	3	0.721921	4.27232	-1.27232	8	0.244021	5.70005	2.29995	7	0.576563	13.066	-6.066	10	1.06959	4.48911	5.51089
0.656504	656.504	2	0.726433	4.41643	-2.41643	5	0.245546	5.9161	-0.916098	10	0.580166	13.5607	-3.56066	6	1.07628	4.63025	1.36976
0.666504	666.504	6	0.730945	5.04113	0.958871	9	0.247071	6.87069	2.12931	28	0.58377	15.7459	12.2541	5	1.08296	5.23425	-0.234254
0.676504	676.504	9	0.735457	6.15618	2.84382	7	0.248596	8.57882	-1.57882	16	0.587373	19.6562	-3.65615	6	1.08965	6.31054	-0.310542
0.686504	686.504	5	0.739969	7.52991	-2.52991	3	0.250121	10.6841	-7.68413	22	0.590977	24.475	-2.47497	10	1.09633	7.6359	2.3641
0.696504	696.504	9	0.744481	8.75152	0.248477	14	0.251646	12.5551	1.44489	28	0.59458	28.7566	-0.756609	9	1.10302	8.81464	0.185357
0.706504	706.504	7	0.748993	9.3951	-2.3951	16	0.253172	13.5358	2.46418	31	0.598184	30.9972	0.0027771	13	1.1097	9.43627	3.56373
0.716504	716.504	8	0.753505	9.20775	-1.20775	15	0.254697	13.2347	1.76533	23	0.601787	30.296	-7.29598	5	1.11639	9.25664	-4.25664
0.726504	726.504	12	0.758017	8.22393	3.77607	11	0.256222	11.6982	-0.69818	45	0.605391	26.7495	18.2505	13	1.12307	8.30769	4.69231
0.736504	736.504	7	0.762529	6.73884	0.261161	14	0.257747	9.36842	4.63158	18	0.608994	21.352	-3.35197	6	1.12976	6.87148	-0.871476
0.746504	746.504	7	0.767041	5.1687	1.8313	6	0.259272	6.86774	-0.867743	18	0.612598	15.5016	2.4984	7	1.13644	5.34552	1.65448
0.756504	756.504	6	0.771553	3.876	2.124	8	0.260797	4.73281	3.26719	15	0.616201	10.3957	4.60434	7	1.14313	4.07498	2.92503
0.766504	766.504	5	0.776065	3.0601	1.9399	8	0.262322	3.25437	4.74563	11	0.619805	6.6757	4.3243	5	1.14981	3.24881	1.75119
0.776504	776.504	3	0.780577	2.7388	0.261205	8	0.263848	2.46079	5.53922	6	0.623409	4.40831	1.59169	4	1.1565	2.88438	1.11562
0.786504	786.504	4	0.785089	2.79264	1.20736	2	0.265373	2.19702	-0.197021	5	0.627012	3.28222	1.71778	2	1.16318	2.87217	-0.872168
0.796504	796.504	4	0.789601	3.03432	0.965681	5	0.266898	2.23256	2.76744	7	0.630616	2.85757	4.14243	7	1.16987	3.04294	3.95706
0.806504	806.504	4	0.794113	3.28269	0.717314	6	0.268423	2.35489	3.64511	3	0.634219	2.74882	0.251183	2	1.17655	3.23506	-1.23506
0.816504	816.504	5	0.798625	3.39703	1.60296	6	0.269948	2.40825	3.59175	4	0.637823	2.69195	1.30805	5	1.18324	3.32476	1.67524
0.826504	826.504	6	0.803137	3.33515	2.66485	1	0.271473	2.33419	-1.33419	5	0.641426	2.56303	2.43697	6	1.18992	3.27262	2.72738
0.836504	836.504	3	0.807649	3.17231	-0.172312	5	0.272998	2.19109	2.80891	7	0.64503	2.40803	4.59197	2	1.1966	3.13999	-1.13999
0.846504	846.504	5	0.812161	3.07327	1.92673	5	0.274523	2.10197	2.89803	5	0.648633	2.30915	2.69085	6	1.20329	3.06012	2.93988
0.856504	856.504	9	0.816673	3.29426	5.70574	4	0.276049	2.27281	1.72719	7	0.652237	2.45052	4.54948	6	1.20998	3.24308	2.75692
0.866504	866.504	6	0.821185	4.12538	1.87462	7	0.277574	2.93581	4.06419	8	0.65584	3.03678	4.96322	8	1.21666	3.92633	4.07367
0.876504	876.504	7	0.825697	5.81629	1.18371	6	0.279099	4.2908	1.7092	4	0.659444	4.24445	-0.244449	5	1.22334	5.3139	-0.313901
0.886504	886.504	16	0.830209	8.46507	7.53493	3	0.280624	6.41566	-3.41566	3	0.663047	6.14113	-3.14113	6	1.23003	7.48503	-1.48503
0.896504	896.504	22	0.834721	11.9	10.1	6	0.282149	9.17139	-3.17138	10	0.666651	8.60107	1.39893	12	1.23672	10.2973	1.70268
0.906504	906.504	20	0.839233	15.6203	4.37966	16	0.283674	12.1547	3.84533	15	0.670254	11.2629	3.73711	12	1.2434	13.3386	-1.33857
0.916504	916.504	22	0.843746	18.8715	3.12848	18	0.285199	14.7585	3.24151	15	0.673858	13.5839	1.41606	19	1.25008	15.989	3.01096
0.926504	926.504	14	0.848257	20.8706	-6.87062	17	0.286725	16.3538	0.646191	10	0.677461	15.0026	-5.00257	16	1.25677	17.6075	-1.60746
0.936504	936.504	13	0.852769	21.0997	-8.09966	18	0.28825	16.5254	1.47464	11	0.681065	15.1488	-4.14883	18	1.26345	17.7719	0.228075
0.946504	946.504	15	0.857282	19.518	-4.51804	15	0.289775	15.2424	-0.242385	11	0.684668	13.9969	-2.99689	18	1.27014	16.4539	1.54614
0.956504	956.504	20	0.861793	16.5647	3.43526	6	0.2913	12.8598	-6.85981	15	0.688272	11.8656	3.13445	8	1.27682	14.0184	-6.01844
0.966504	966.504	10	0.866305	12.9682	-2.96816	7	0.292825	9.96446	-2.96446	11	0.691875	9.28006	1.71994	9	1.28351	11.0664	-2.06638
0.976504	976.504	10	0.870818	9.45473	0.54527	6	0.29435	7.14061	-1.14061	9	0.695479	6.76251	2.23748	10	1.29019	8.19424	1.80577
0.986504	986.504	7	0.87533	6.53354	0.466464	2	0.295875	4.79614	-2.79614	3	0.699082	4.67603	-1.67603	8	1.29688	5.81616	2.18384
0.996504	996.504	4	0.879842	4.41868	-0.418681	4	0.297401	3.10039	0.899612	8	0.702686	3.16938	4.83062	3	1.30356	4.10076	-1.10076
1.0065	1006.5	7	0.884354	3.08765	3.91235	1	0.298926	2.03134	-1.03134	1	0.70629	2.2195	-1.2195	5	1.31025	3.0197	1.9803
1.0165	1016.5	8	0.888866	2.40608	5.59392	1	0.300451	1.47579	-0.475794	2	0.709893	1.72068	0.279321	6	1.31693	2.44967	3.55033
1.0265	1026.5	2	0.893378	2.23662	-0.236622	0	0.301976	1.31704	-1.31704	0	0.713496	1.56317	-1.56317	3	1.32362	2.26217	0.737829
1.0365	1036.5	7	0.89789	2.49456	4.50544	2	0.303501	1.48022	0.519785	5	0.7171	1.67416	3.32584	2	1.3303	2.37068	-0.370677
1.0465	1046.5	9	0.902402	3.14224	5.85776	1	0.305026	1.92973	-0.929726	4	0.720704	2.01717	1.98283	5	1.33699	2.73087	2.26913
1.0565	1056.5	8	0.906914	4.13598	3.86402	5	0.306551	2.62963	2.37037	7	0.724307	2.55939	4.44061	4	1.34367	3.30484	0.695157
1.0665	1066.5	8	0.911426	5.39626	2.60374	2	0.308076	3.52295	-1.52295	6	0.727911	3.25602	2.74398	7	1.35036	4.04488	2.95512
1.0765	1076.5	5	0.915938	6.72541	-1.72541	3	0.309602	4.46673	-1.46673	4	0.731514	3.9934	0.00659609	5	1.35704	4.82904	0.170965
1.0865	1086.5	7	0.92045	7.87468	-0.874678	8	0.311127	5.28343	2.71657	6	0.735118	4.6327	1.3673	5	1.36373	5.50983	-0.50983
1.0965	1096.5	9	0.924962	8.58855	0.411445	3	0.312652	5.79009	-2.79009	3	0.738721	5.03021	-2.03021	6	1.37041	5.93422	0.0657768
1.1065	1106.5	8	0.929474	8.69872	-0.698723	5	0.314177	5.86616	-0.866155	2	0.742325	5.09125	-3.09125	5	1.3771	6.00138	-1.00137
1.1165	1116.5	4	0.933986	8.18591	-4.18591	6	0.315702	5.50137	0.49863	4	0.745928	4.80604	-0.806041	4	1.38378	5.69941	-1.69941
1.1265	1126.5	6	0.938498	7.18006	-1.18006	8	0.317227	4.78917	3.21083	4	0.749532	4.24722	-0.247223	5	1.39047	5.10516	-0.105157
1.1365	1136.5	7	0.94301	5.91155	1.08845	4	0.318752	3.90473	0.0952723	2	0.753135	3.54771	-1.54771	3	1.39715	4.35622	-1.35622
1.1465	1146.5	7	0.947522	4.63056	2.36944	3	0.320277	3.0486	-0.048598	2	0.756739	2.85603	-0.85603	3	1.40384	3.60305	-0.603052
1.1565	1156.5	3	0.952034	3.5432	-0.543204	2	0.321803	2.41225	-0.412251	7	0.760342	2.30503	4.69497	8	1.41052	2.97194	5.02806
1.1665	1166.5	4	0.956546	2.78236	1.21764	3	0.323328	2.16864	0.831359	5	0.763946	1.99992	3.00008	2	1.41721	2.54831	-0.548312
1.1765	1176.5	4	0.961058	2.41673	1.58327	4	0.324853	2.48536	1.51464	2	0.767549	2.0261	-0.026103	2	1.42389	2.38287	-0.382869
1.1865	1186.5	4	0.96557	2.4735	1.5265	2	0.326378	3.53001	-1.53001	1	0.771153	2.45752	-1.45752	4	1.43058	2.50407	1.49593
1.1965	1196.5	4	0.970082	2.95253	1.04747	7	0.327903	5.44003	1.55997	0	0.774756	3.34858	-3.34858	2	1.43726	2.92325	-0.923249
1.2065	1206.5	2	0.974594	3.81832	-1.81832	14	0.329428	8.24494	5.75506	2	0.77836	4.70118	-2.70118	1	1.44395	3.62384	-2.62384
1.2165	1216.5	5	0.979106	4.97502	0.0249801	12	0.330953	11.766	0.233979	7	0.781963	6.418	0.581999	8	1.45063	4.53966	3.46034
1.2265	1226.5	7	0.983618	6.24378	0.756216	13	0.332479	15.552	-2.55203	8	0.785567	8.27078	-0.270784	6	1.45732	5.53749	0.462509
1.2365	1236.5	6	0.98813	7.38973	-1.38973	14	0.334004	18.933	-4.93297	6	0.78917	9.9291	-3.9291	6	1.464	6.43593	-0.43593
1.2465	1246.5	9	0.992642	8.15023	0.849773	21	0.335529	21.1733	-0.173292	17	0.792774	11.0289	5.97114	6	1.47069	7.03328	-1.03328
1.2565	1256.5	6	0.997154	8.33916	-2.33916	25	0.337054	21.7354	3.26464	7	0.796377	11.3056	-4.30557	7	1.47737	7.18525	-0.185255
1.2665	1266.5	10	1.00167	7.90958	2.09042	19	0.338579	20.4812	-1.48123	6	0.799981	10.6916	-4.6916	5	1.48406	6.85525	-1.85525
1.2765	1276.5	2	1.00618	6.9668	-4.9668	21	0.340104	17.7236	3.2764	16	0.803585	9.33995	6.66005	5	1.49074	6.12563	-1.12563
1.2865	1286.5	7	1.01069	5.729	1.271	13	0.341629	14.1012	-1.10119	9	0.807188	7.56406	1.43594	7	1.49743	5.16624	1.83376
1.2965	1296.5	6	1.0152	4.44343	1.55657	9	0.343154	10.3377	-1.3377	6	0.810791	5.71906	0.28094	5	1.50411	4.16956	0.830442
1.3065	1306.5	10	1.01971	3.308	6.692	7	0.34468	7.01219	-0.0121903	7	0.814395	4.08912	2.91088	4	1.5108	3.28963	0.710368
1.3165	1316.5	3	1.02423	2.4291	0.570895	5	0.346205	4.43601	0.56399	4	0.817998	2.82704	1.17296	6	1.51748	2.60928	3.39072
1.3265	1326.5	6	1.02874	1.8234	4.1766	6	0.34773	2.65801	3.34199	4	0.821602	1.95678	2.04322	4	1.52416	2.14148	1.85852
1.3365	1336.5	3	1.03325	1.44841	1.55159	2	0.349255	1.55373	0.446274	1	0.825206	1.41727	-0.417271	3	1.53085	1.85315	1.14685
1.3465	1346.5	1	1.03776	1.26939	-0.269392	2	0.35078	0.939008	1.06099	1	0.828809	1.12151	-0.121507	6	1.53754	1.72656	4.27344
1.3565	1356.5	2	1.04227	1.22505	0.774951	3	0.352305	0.633938	2.36606	2	0.832413	0.981212	1.01879	2	1.54422	1.71406	0.285937
1.3665	1366.5	4	1.04679	1.34091	2.65909	2	0.35383	0.521328	1.47867	2	0.836016	0.946724	1.05328	7	1.5509	1.85708	5.14292
1.3765	1376.5	5	1.0513	1.72137	3.27863	2	0.355356	0.547818	1.45218	1	0.83962	1.00654	-0.0065397	4	1.55759	2.27712	1.72287
1.3865	1386.5	8	1.05581	2.60329	5.39671	2	0.356881	0.715951	1.28405	6	0.843223	1.19017	4.80983	7	1.56428	3.23602	3.76398
1.3965	1396.5	5	1.06032	4.42328	0.576723	4	0.358406	1.12946	2.87054	0	0.846827	1.59658	-1.59658	3	1.57096	5.2052	-2.2052
1.4065	1406.5	9	1.06483	7.81121	1.18879	3	0.359931	1.90302	1.09698	5	0.85043	2.35281	2.64719	7	1.57764	8.86874	-1.86874
1.4165	1416.5	10	1.06934	13.5529	-3.55289	4	0.361456	3.21542	0.784576	2	0.854034	3.63341	-1.63341	7	1.58433	15.076	-8.07602
1.4265	1426.5	17	1.07386	22.3784	-5.37835	2	0.362981	5.23301	-3.23301	4	0.857637	5.60069	-1.60069	12	1.59101	24.6161	-12.6161
1.4365	1436.5	27	1.07837	34.6108	-7.61082	9	0.364506	8.02974	0.970261	7	0.861241	8.32661	-1.32661	31	1.5977	37.8383	-6.8383
1.4465	1446.5	37	1.08288	49.7598	-12.7598	9	0.366032	11.4932	-2.49316	11	0.864844	11.7019	-0.70185	56	1.60438	54.2126	1.78743
1.4565	1456.5	48	1.08739	66.259	-18.259	17	0.367557	15.2652	1.73477	12	0.868448	15.3777	-3.37768	58	1.61107	72.0461	-14.0461
1.4665	1466.5	64	1.0919	81.5729	-17.5729	17	0.369082	18.7664	-1.76636	16	0.872051	18.7896	-2.78964	76	1.61775	88.5986	-12.5986
1.4765	1476.5	91	1.09642	92.7748	-1.77476	19	0.370607	21.3275	-2.3275	22	0.875655	21.2861	0.713884	108	1.62444	100.707	7.29309
1.4865	1486.5	106	1.10093	97.4488	8.55117	21	0.372132	22.3964	-1.39644	28	0.879258	22.3293	5.67069	107	1.63112	105.76	1.2397
1.4965	1496.5	100	1.10544	94.5446	5.4554	23	0.373657	21.7331	1.26694	17	0.882862	21.6853	-4.68534	112	1.63781	102.623	9.37667
1.5065	1506.5	95	1.10995	84.7685	10.2315	20	0.375182	19.4988	0.501188	21	0.886465	19.5115	1.48853	89	1.64449	92.0595	-3.05947
1.5165	1516.5	81	1.11447	70.3127	10.6873	17	0.376707	16.1948	0.805159	15	0.890069	16.2958	-1.29576	86	1.65118	76.438	9.56197
1.5265	1526.5	68	1.11898	54.0612	13.9388	15	0.378233	12.4804	2.51962	15	0.893672	12.6803	2.31973	60	1.65786	58.8758	1.12417
1.5365	1536.5	41	1.12349	38.6635	2.3365	10	0.379758	8.96109	1.03891	14	0.897276	9.25486	4.74514	51	1.66455	42.2364	8.76363
1.5465	1546.5	27	1.128	25.8786	1.1214	7	0.381283	6.03906	0.960942	4	0.900879	6.41113	-2.41113	26	1.67123	28.4207	-2.42074
1.5565	1556.5	14	1.13251	16.3847	-2.38472	7	0.382808	3.86933	3.13067	10	0.904483	4.3001	5.6999	18	1.67792	18.1619	-0.161922
1.5665	1566.5	10	1.13702	9.99181	0.00819206	5	0.384333	2.40846	2.59154	4	0.908087	2.87944	1.12056	17	1.6846	11.2545	5.74548
1.5765	1576.5	11	1.14154	6.03923	4.96077	3	0.385858	1.50543	1.49457	3	0.91169	2.00207	0.99793	7	1.69129	6.98453	0.0154696
1.5865	1586.5	6	1.14605	3.76339	2.23661	5	0.387383	0.985686	4.01431	2	0.915293	1.498	0.502004	5	1.69797	4.5267	0.473303
1.5965	1596.5	4	1.15056	2.57343	1.42657	3	0.388908	0.743228	2.25677	1	0.918897	1.26063	-0.260632	5	1.70466	3.23535	1.76465
1.6065	1606.5	3	1.15507	2.01315	0.986855	1	0.390434	0.668907	0.331093	4	0.922501	1.18423	2.81576	5	1.71134	2.61863	2.38137
1.6165	1616.5	6	1.15958	1.91232	4.08768	2	0.391959	0.78047	1.21953	1	0.926104	1.27957	-0.279568	3	1.71803	2.47876	0.521242
1.6265	1626.5	7	1.1641	2.2558	4.7442	0	0.393484	1.17121	-1.17121	2	0.929708	1.62635	0.373653	5	1.72471	2.77574	2.22426
1.6365	1636.5	3	1.16861	3.38968	-0.389678	4	0.395009	2.09899	1.90101	1	0.933311	2.45514	-1.45514	6	1.7314	3.84002	2.15998
1.6465	1646.5	5	1.17312	5.71669	-0.716691	0	0.396534	3.94994	-3.94994	7	0.936915	4.10815	2.89185	5	1.73808	6.03514	-1.03514
1.6565	1656.5	7	1.17763	9.98501	-2.98501	7	0.398059	7.31812	-0.318119	5	0.940518	7.11525	-2.11525	7	1.74477	10.0665	-3.06648
1.6665	1666.5	9	1.18214	17.1076	-8.10756	7	0.399585	12.9261	-5.92611	2	0.944122	12.121	-10.121	8	1.75145	16.7953	-8.79534
1.6765	1676.5	18	1.18666	27.9469	-9.94692	11	0.40111	21.4555	-10.4555	14	0.947725	19.7335	-5.73348	27	1.75814	27.0358	-0.0357971
1.6865	1686.5	34	1.19117	42.9385	-8.93854	28	0.402635	33.2505	-5.25048	21	0.951329	30.2597	-9.25975	24	1.76482	41.1988	-17.1988
1.6965	1696.5	48	1.19568	61.6503	-13.6503	32	0.40416	47.9722	-15.9722	43	0.954932	43.3973	-0.397343	51	1.77151	58.8758	-7.87581
1.7065	1706.5	67	1.20019	82.4625	-15.4625	42	0.405685	64.346	-22.3459	49	0.958536	58.0091	-9.00905	62	1.77819	78.537	-16.537
1.7165	1716.5	93	1.2047	102.601	-9.60064	81	0.40721	80.1894	0.810562	68	0.962139	72.1476	-4.1476	99	1.78488	97.5616	1.43838
1.7265	1726.5	115	1.20922	118.664	-3.66361	89	0.408735	92.8264	-3.82638	79	0.965743	83.4251	-4.42512	103	1.79156	112.737	-9.73686
1.7365	1736.5	123	1.21373	127.547	-4.54752	108	0.41026	99.8145	8.18545	79	0.969346	89.6625	-10.6625	120	1.79825	121.131	-1.13084
1.7465	1746.5	147	1.21824	127.439	19.5611	107	0.411786	99.7271	7.27295	100	0.97295	89.5867	10.4133	125	1.80493	121.031	3.96935
1.7565	1756.5	113	1.22275	118.443	-5.44283	85	0.413311	92.6466	-7.64658	87	0.976553	83.2714	3.72858	135	1.81162	112.536	22.4644
1.7665	1766.5	109	1.22726	102.548	6.45212	91	0.414836	80.1378	10.8622	92	0.980157	72.1127	19.8873	115	1.8183	97.5239	17.4761
1.7765	1776.5	110	1.23178	82.9405	27.0595	78	0.416361	64.708	13.292	60	0.98376	58.3478	1.65224	69	1.82499	79.0056	-10.0056
1.7865	1786.5	69	1.23629	62.9872	6.01283	51	0.417886	49.0059	1.99414	47	0.987364	44.3398	2.66016	57	1.83167	60.1604	-3.16043
1.7965	1796.5	35	1.2408	45.3222	-10.3222	38	0.419411	35.1043	2.89568	25	0.990967	31.9385	-6.93848	47	1.83836	43.4768	3.5232
1.8065	1806.5	40	1.24531	31.3663	8.63374	29	0.420936	24.1213	4.87873	23	0.994571	22.1411	0.858868	26	1.84504	30.2967	-4.29674
1.8165	1816.5	21	1.24982	21.3491	-0.349056	20	0.422461	16.2373	3.76267	18	0.998174	15.109	2.89102	10	1.85173	20.8371	-10.8371
1.8265	1826.5	11	1.25433	14.6822	-3.68214	13	0.423987	10.9895	2.01045	4	1.00178	10.429	-6.42895	17	1.85841	14.5421	2.45791
1.8365	1836.5	14	1.25885	10.437	3.56303	7	0.425512	7.64732	-0.647317	6	1.00538	7.44919	-1.44919	18	1.86509	10.5346	7.46537
1.8465	1846.5	6	1.26336	7.72563	-1.72564	6	0.427037	5.51202	0.487976	4	1.00899	5.54641	-1.54641	14	1.87178	7.97602	6.02398
1.8565	1856.5	7	1.26787	5.8974	1.1026	6	0.428562	4.07169	1.92831	8	1.01259	4.26388	3.73612	9	1.87847	6.25161	2.74839
1.8665	1866.5	6	1.27238	4.56855	1.43145	3	0.430087	3.02444	-0.0244396	2	1.01619	3.33232	-1.33232	0	1.88515	4.99897	-4.99897
1.8765	1876.5	4	1.27689	3.55608	0.443916	5	0.431612	2.22634	2.77366	5	1.0198	2.62341	2.37659	4	1.89183	4.04527	-0.0452695
1.8865	1886.5	6	1.28141	2.7388	3.2612	3	0.433137	1.58207	1.41793	2	1.0234	2.05217	-0.0521677	3	1.89852	3.27604	-0.276035
1.8965	1896.5	1	1.28592	2.21265	-1.21265	1	0.434663	1.16713	-0.167132	1	1.027	1.68597	-0.685973	4	1.90521	2.7819	1.2181
1.9065	1906.5	2	1.29043	1.84457	0.155432	0	0.436188	0.876772	-0.876772	1	1.03061	1.43127	-0.431266	0	1.91189	2.43716	-2.43716
1.9165	1916.5	2	1.29494	1.61098	0.389023	0	0.437713	0.692306	-0.692306	4	1.03421	1.27117	2.72884	3	1.91857	2.21948	0.780516
1.9265	1926.5	1	1.29946	1.47647	-0.47647	1	0.439238	0.585688	0.414312	2	1.03781	1.18033	0.819669	2	1.92526	2.09536	-0.095355
1.9365	1936.5	5	1.30397	1.40635	3.59365	1	0.440763	0.529405	0.470595	0	1.04142	1.13387	-1.13387	1	1.93194	2.03191	-1.03191
1.9465	1946.5	4	1.30848	1.37328	2.62672	0	0.442288	0.501778	-0.501778	1	1.04502	1.11215	-0.112152	0	1.93863	2.00327	-2.00327
1.9565	1956.5	0	1.31299	1.35896	-1.35896	0	0.443813	0.48832	-0.48832	3	1.04862	1.10211	1.89789	1	1.94531	1.9921	-0.9921
1.9665	1966.5	0	1.3175	1.35284	-1.35284	3	0.445339	0.480757	2.51924	3	1.05223	1.09642	1.90358	1	1.952	1.98845	-0.988445
1.9765	1976.5	2	1.32201	1.34808	0.651919	1	0.446864	0.473866	0.526134	4	1.05583	1.09066	2.90934	3	1.95868	1.98592	1.01408
1.9865	1986.5	2	1.32653	1.34724	0.65276	2	0.448389	0.469846	1.53015	0	1.05943	1.08711	-1.08711	0	1.96537	1.98701	-1.98701
1.9965	1996.5	3	1.33104	1.34638	1.65362	1	0.449914	0.465811	0.534188	2	1.06304	1.08354	0.916459	0	1.97205	1.98809	-1.98809
2.0065	2006.5	0	1.33555	1.34615	-1.34615	2	0.451439	0.462421	1.53758	1	1.06664	1.0808	-0.0808042	2	1.97874	1.98982	0.010183
2.0165	2016.5	1	1.34006	1.34689	-0.34689	0	0.452964	0.460037	-0.460037	2	1.07024	1.07937	0.920634	2	1.98542	1.99256	0.00744128
2.0265	2026.5	2	1.34457	1.34867	0.651326	0	0.454489	0.458737	-0.458737	2	1.07385	1.07933	0.920675	3	1.99211	1.99639	1.00361
2.0365	2036.5	2	1.34909	1.35138	0.648618	0	0.456014	0.458393	-0.458393	0	1.07745	1.08052	-1.08052	1	1.99879	2.00119	-1.00119
2.0465	2046.5	1	1.3536	1.3548	-0.354797	0	0.45754	0.458781	-0.458781	2	1.08105	1.08265	0.917345	1	2.00548	2.00673	-1.00673
2.0565	2056.5	2	1.35811	1.35869	0.641307	5	0.459065	0.459669	4.54033	1	1.08466	1.08544	-0.0854367	2	2.01216	2.01277	-0.0127728
2.0665	2066.5	2	1.36262	1.36289	0.637113	1	0.46059	0.460864	0.539136	1	1.08826	1.08862	-0.0886146	1	2.01885	2.01912	-1.01913
2.0765	2076.5	1	1.36713	1.36725	-0.367246	0	0.462115	0.462231	-0.462231	0	1.09186	1.09201	-1.09201	0	2.02553	2.02565	-2.02565
2.0865	2086.5	3	1.37165	1.37169	1.62831	1	0.46364	0.463686	0.536314	0	1.09547	1.09553	-1.09553	0	2.03222	2.03226	-2.03226
2.0965	2096.5	1	1.37616	1.37616	-0.376158	0	0.465165	0.465165	-0.465165	0	1.09907	1.09907	-1.09907	0	2.0389	2.0389	-2.0389
2.1065	2106.5	2	1.38067	1.38067	0.61933	2	0.46669	0.46669	1.53331	3	1.10268	1.10268	1.89732	2	2.04559	2.04559	-0.0455882
2.1165	2116.5	1	1.38518	1.38518	-0.385183	2	0.468216	0.468217	1.53178	1	1.10628	1.10628	-0.10628	0	2.05227	2.05227	-2.05227
2.1265	2126.5	1	1.38969	1.3897	-0.389698	1	0.469741	0.469745	0.530255	2	1.10988	1.10989	0.890113	0	2.05896	2.05896	-2.05896
2.1365	2136.5	1	1.39421	1.39421	-0.394215	0	0.471266	0.471275	-0.471275	2	1.11349	1.1135	0.886502	0	2.06564	2.06565	-2.06565
2.1465	2146.5	2	1.39872	1.39874	0.60126	1	0.472791	0.472813	0.527187	0	1.11709	1.11712	-1.11712	2	2.07233	2.07235	-0.072351
2.1565	2156.5	1	1.40323	1.40328	-0.403277	4	0.474316	0.474365	3.52563	2	1.12069	1.12075	0.879245	1	2.07901	2.07906	-1.07906
2.1665	2166.5	2	1.40774	1.40784	0.592161	3	0.475841	0.475942	2.52406	1	1.1243	1.12443	-0.124425	3	2.0857	2.0858	0.9142
2.1765	2176.5	0	1.41225	1.41244	-1.41244	1	0.477366	0.47756	0.52244	1	1.1279	1.12815	-0.128148	0	2.09238	2.09258	-2.09258
2.1865	2186.5	3	1.41677	1.4171	1.5829	0	0.478891	0.47924	-0.47924	0	1.1315	1.13195	-1.13195	1	2.09907	2.09942	-1.09942
2.1965	2196.5	3	1.42128	1.42185	1.57815	1	0.480417	0.481005	0.518995	1	1.13511	1.13586	-0.135865	1	2.10575	2.10635	-1.10635
2.2065	2206.5	0	1.42579	1.42669	-1.42669	1	0.481942	0.482874	0.517126	0	1.13871	1.13991	-1.13991	0	2.11244	2.11338	-2.11338
2.2165	2216.5	2	1.4303	1.43164	0.56836	1	0.483467	0.484853	0.515146	3	1.14231	1.1441	1.8559	1	2.11912	2.12052	-1.12052
2.2265	2226.5	0	1.43481	1.43668	-1.43668	0	0.484992	0.486926	-0.486926	0	1.14592	1.14841	-1.14841	3	2.12581	2.12776	0.87224
2.2365	2236.5	1	1.43932	1.44177	-0.441768	0	0.486517	0.489047	-0.489047	1	1.14952	1.15278	-0.152783	3	2.13249	2.13505	0.864954
2.2465	2246.5	2	1.44384	1.44683	0.553166	1	0.488042	0.491147	0.508853	0	1.15312	1.15713	-1.15713	0	2.13918	2.14231	-2.14231
2.2565	2256.5	1	1.44835	1.4518	-0.4518	0	0.489567	0.493142	-0.493142	1	1.15673	1.16134	-0.161337	2	2.14586	2.14947	-0.149469
2.2665	2266.5	1	1.45286	1.45659	-0.456587	1	0.491092	0.494952	0.505048	0	1.16033	1.16531	-1.16531	0	2.15255	2.15644	-2.15644
2.2765	2276.5	3	1.45737	1.46115	1.53885	1	0.492618	0.496528	0.503472	1	1.16393	1.16898	-0.168976	1	2.15923	2.16318	-1.16318
2.2865	2286.5	3	1.46189	1.46547	1.53453	1	0.494143	0.497858	0.502142	3	1.16754	1.17233	1.82767	1	2.16592	2.16967	-1.16967
2.2965	2296.5	0	1.46646	1.46966	-1.46966	1	0.495697	0.499009	0.500991	1	1.1712	1.17548	-0.175475	2	2.17261	2.17595	-0.175948
2.3065	2306.5	2	1.39172	1.3944	0.605603	1	0.59375	0.596519	0.403481	0	1.07062	1.07419	-1.07419	4	2.04486	2.04765	1.95235
2.3165	2316.5	0	1.32581	1.3279	-1.3279	0	0.685089	0.687261	-0.687261	1	0.981567	0.984369	0.0156314	3	1.92538	1.92758	1.07242
2.3265	2326.5	4	1.26865	1.27019	2.72981	2	0.769592	0.77119	1.22881	0	0.904053	0.906114	-0.906114	1	1.81415	1.81576	-0.81576
2.3365	2336.5	1	1.22028	1.22134	-0.22134	0	0.847351	0.848454	-0.848454	1	0.838074	0.839496	0.160504	2	1.71121	1.71233	0.287675
2.3465	2346.5	0	1.18057	1.18126	-1.18126	1	0.918365	0.91908	0.0809205	2	0.783508	0.784429	1.21557	0	1.61655	1.61727	-1.61727
2.3565	2356.5	1	1.14972	1.15014	-0.150138	0	0.982544	0.982978	-0.982978	1	0.74054	0.741099	0.258901	0	1.53015	1.53059	-1.53059
2.3665	2366.5	1	1.12759	1.12783	-0.127832	1	1.03998	1.04022	-0.040225	3	0.709106	0.709425	2.29058	1	1.45196	1.45221	-0.452215
2.3765	2376.5	3	1.11423	1.11435	1.88565	0	1.0907	1.09083	-1.09083	0	0.689148	0.689318	-0.689318	2	1.38208	1.38221	0.617787
2.3865	2386.5	1	1.10956	1.10962	-0.109622	2	1.13458	1.13465	0.865351	1	0.680725	0.68081	0.31919	1	1.32046	1.32053	-0.320532
2.3965	2396.5	3	1.11371	1.11374	1.88626	3	1.17175	1.17178	1.82822	1	0.683716	0.683756	0.316244	0	1.26712	1.26715	-1.26715
2.4065	2406.5	1	1.12665	1.12666	-0.126661	0	1.20206	1.20207	-1.20207	0	0.698303	0.698321	-0.698321	0	1.22205	1.22206	-1.22206
2.4165	2416.5	2	1.14831	1.14832	0.851679	1	1.22565	1.22565	-0.225653	1	0.724426	0.724434	0.275566	1	1.18521	1.18522	-0.185217
2.4265	2426.5	0	1.17868	1.17868	-1.17868	1	1.24252	1.24253	-0.242525	0	0.762024	0.762027	-0.762027	2	1.15671	1.15671	0.84329
2.4365	2436.5	1	1.21786	1.21786	-0.217865	0	1.25253	1.25253	-1.25253	2	0.811035	0.811035	1.18897	3	1.13641	1.13641	1.86359
2.4465	2446.5	0	1.26584	1.26584	-1.26584	0	1.25577	1.25577	-1.25577	0	0.871643	0.871643	-0.871643	2	1.12439	1.12439	0.87561
2.4565	2456.5	0	1.32254	1.32254	-1.32254	3	1.25232	1.25232	1.74768	1	0.943848	0.943848	0.0561523	1	1.12064	1.12064	-0.120636
2.4665	2466.5	2	1.38794	1.38794	0.612061	1	1.24204	1.24204	-0.242035	0	1.02747	1.02747	-1.02747	1	1.12512	1.12512	-0.125122
2.4765	2476.5	1	1.46216	1.46216	-0.462158	0	1.22494	1.22494	-1.22494	2	1.12268	1.12268	0.877319	1	1.13794	1.13794	-0.137939
2.4865	2486.5	1	1.54517	1.54517	-0.545166	3	1.20117	1.20117	1.79883	1	1.22925	1.22925	-0.229248	4	1.15897	1.15897	2.84103
2.4965	2496.5	0	1.6369	1.6369	-1.6369	3	1.17056	1.17056	1.82944	1	1.34741	1.34741	-0.347412	0	1.18826	1.18826	-1.18826
2.5065	2506.5	3	1.73737	1.73737	1.26263	2	1.13324	1.13324	0.86676	1	1.47717	1.47717	-0.477173	2	1.22586	1.22586	0.774139
2.5165	2516.5	2	1.84662	1.84662	0.153381	2	1.08911	1.08911	0.910889	0	1.61823	1.61823	-1.61823	0	1.27167	1.27167	-1.27167
2.5265	2526.5	2	1.9646	1.9646	0.0354004	0	1.03821	1.03821	-1.03821	2	1.77093	1.77093	0.229065	2	1.32577	1.32577	0.674225
2.5365	2536.5	5	2.09143	2.09143	2.90857	0	0.98056	0.98056	-0.98056	3	1.93524	1.93524	1.06476	0	1.38815	1.38815	-1.38815
2.5465	2546.5	1	2.22687	2.22687	-1.22687	0	0.916077	0.916077	-0.916077	1	2.11096	2.11096	-1.11096	2	1.4588	1.4588	0.541199
2.5565	2556.5	2	2.37115	2.37115	-0.371155	1	0.84494	0.84494	0.15506	4	2.2981	2.2981	1.7019	1	1.53766	1.53766	-0.537659
2.5665	2566.5	1	2.52417	2.52417	-1.52417	0	0.766876	0.766876	-0.766876	0	2.49695	2.49695	-2.49695	1	1.62485	1.62485	-0.624847
2.5765	2576.5	1	2.51207	2.51207	-1.51207	2	0.755285	0.755285	1.24472	0	2.46258	2.46258	-2.46258	1	1.6142	1.6142	-0.614197
2.5865	2586.5	1	2.49997	2.49997	-1.49997	1	0.743694	0.743694	0.256306	2	2.42822	2.42822	-0.428219	0	1.60355	1.60355	-1.60355
2.5965	2596.5	0	2.48787	2.48787	-2.48787	2	0.732103	0.732103	1.2679	0	2.39385	2.39385	-2.39385	4	1.5929	1.5929	2.4071
2.6065	2606.5	1	2.47576	2.47576	-1.47576	0	0.720512	0.720512	-0.720512	1	2.35949	2.35949	-1.35949	0	1.58225	1.58225	-1.58225
2.6165	2616.5	1	2.46366	2.46366	-1.46366	3	0.70892	0.70892	2.29108	1	2.32513	2.32513	-1.32513	1	1.5716	1.5716	-0.571597
2.6265	2626.5	1	2.45156	2.45156	-1.45156	1	0.697329	0.697329	0.302671	4	2.29076	2.29076	1.70924	1	1.56095	1.56095	-0.560947
2.6365	2636.5	2	2.43946	2.43946	-0.439458	1	0.685738	0.685738	0.314262	4	2.2564	2.2564	1.7436	2	1.5503	1.5503	0.449703
2.6465	2646.5	0	2.42736	2.42736	-2.42736	1	0.674147	0.674147	0.325853	0	2.22203	2.22203	-2.22203	0	1.53965	1.53965	-1.53965
2.6565	2656.5	1	2.41526	2.41526	-1.41525	2	0.662556	0.662556	1.33744	1	2.18767	2.18767	-1.18767	0	1.529	1.529	-1.529
2.6665	2666.5	1	2.40315	2.40315	-1.40315	1	0.650965	0.650965	0.349035	1	2.1533	2.1533	-1.1533	2	1.51835	1.51835	0.481653
2.6765	2676.5	0	2.39105	2.39105	-2.39105	1	0.639374	0.639374	0.360626	0	2.11894	2.11894	-2.11894	1	1.5077	1.5077	-0.507697
2.6865	2686.5	2	2.37895	2.37895	-0.37895	0	0.627783	0.627783	-0.627783	0	2.08458	2.08458	-2.08458	0	1.49705	1.49705	-1.49705
2.6965	2696.5	1	2.36685	2.36685	-1.36685	0	0.616191	0.616191	-0.616191	0	2.05021	2.05021	-2.05021	1	1.4864	1.4864	-0.486397
2.7065	2706.5	1	2.35475	2.35475	-1.35475	0	0.6046	0.6046	-0.6046	0	2.01585	2.01585	-2.01585	1	1.47575	1.47575	-0.475747
2.7165	2716.5	0	2.34265	2.34265	-2.34265	0	0.593009	0.593009	-0.593009	2	1.98148	1.98148	0.0185187	0	1.4651	1.4651	-1.4651
2.7265	2726.5	0	2.33054	2.33054	-2.33054	0	0.581418	0.581418	-0.581418	0	1.94712	1.94712	-1.94712	1	1.45445	1.45445	-0.454447
2.7365	2736.5	1	2.31844	2.31844	-1.31844	2	0.569827	0.569827	1.43017	1	1.91275	1.91275	-0.912752	0	1.4438	1.4438	-1.4438
2.7465	2746.5	6	2.30634	2.30634	3.69366	0	0.558236	0.558236	-0.558236	0	1.87839	1.87839	-1.87839	0	1.43315	1.43315	-1.43315
2.7565	2756.5	4	2.29424	2.29424	1.70576	0	0.546645	0.546645	-0.546645	1	1.84402	1.84402	-0.844024	0	1.4225	1.4225	-1.4225
2.7665	2766.5	0	2.28214	2.28214	-2.28214	1	0.535053	0.535053	0.464946	0	1.80966	1.80966	-1.80966	2	1.41185	1.41185	0.588153
2.7765	2776.5	0	2.27004	2.27004	-2.27004	0	0.523462	0.523462	-0.523462	1	1.7753	1.7753	-0.775294	0	1.4012	1.4012	-1.4012
2.7865	2786.5	2	2.25793	2.25793	-0.257934	2	0.511871	0.511871	1.48813	2	1.74093	1.74093	0.25907	0	1.39055	1.39055	-1.39055
2.7965	2796.5	1	2.24583	2.24583	-1.24583	1	0.50028	0.50028	0.49972	2	1.70657	1.70657	0.293434	1	1.3799	1.3799	-0.379897
2.8065	2806.5	0	2.23373	2.23373	-2.23373	2	0.488689	0.488689	1.51131	2	1.6722	1.6722	0.327799	0	1.36925	1.36925	-1.36925
2.8165	2816.5	0	2.22163	2.22163	-2.22163	2	0.477098	0.477098	1.5229	0	1.63784	1.63784	-1.63784	0	1.3586	1.3586	-1.3586
2.8265	2826.5	0	2.20953	2.20953	-2.20953	1	0.465507	0.465507	0.534493	3	1.60347	1.60347	1.39653	0	1.34795	1.34795	-1.34795
2.8365	2836.5	1	2.19742	2.19742	-1.19742	1	0.453916	0.453916	0.546084	2	1.56911	1.56911	0.430892	1	1.3373	1.3373	-0.337296
2.8465	2846.5	3	2.18532	2.18532	0.814676	0	0.442324	0.442324	-0.442324	1	1.53474	1.53474	-0.534743	3	1.32665	1.32665	1.67335
2.8565	2856.5	1	2.17322	2.17322	-1.17322	0	0.430733	0.430733	-0.430733	3	1.50038	1.50038	1.49962	0	1.316	1.316	-1.316
2.8665	2866.5	1	2.16112	2.16112	-1.16112	2	0.419142	0.419142	1.58086	1	1.46601	1.46601	-0.466014	1	1.30535	1.30535	-0.305346
2.8765	2876.5	0	2.14902	2.14902	-2.14902	1	0.407551	0.407551	0.592449	0	1.43165	1.43165	-1.43165	0	1.2947	1.2947	-1.2947
2.8865	2886.5	1	2.13692	2.13692	-1.13692	0	0.39596	0.39596	-0.39596	1	1.39729	1.39729	-0.397286	1	1.28405	1.28405	-0.284046
2.8965	2896.5	2	2.12481	2.12481	-0.124815	1	0.384369	0.384369	0.615631	0	1.36292	1.36292	-1.36292	4	1.2734	1.2734	2.7266
2.9065	2906.5	2	2.11271	2.11271	-0.112714	1	0.372778	0.372778	0.627222	0	1.32856	1.32856	-1.32856	1	1.26275	1.26275	-0.262746
2.9165	2916.5	0	2.10061	2.10061	-2.10061	1	0.361186	0.361186	0.638814	0	1.29419	1.29419	-1.29419	0	1.2521	1.2521	-1.2521
2.9265	2926.5	0	2.08851	2.08851	-2.08851	3	0.349595	0.349595	2.65041	1	1.25983	1.25983	-0.259828	1	1.24145	1.24145	-0.241446
2.9365	2936.5	0	2.07641	2.07641	-2.07641	2	0.338004	0.338004	1.662	0	1.22546	1.22546	-1.22546	2	1.2308	1.2308	0.769204
2.9465	2946.5	1	2.06431	2.06431	-1.06431	0	0.326413	0.326413	-0.326413	3	1.1911	1.1911	1.8089	1	1.22015	1.22015	-0.220146
2.9565	2956.5	1	2.05221	2.05221	-1.05221	2	0.314822	0.314822	1.68518	0	1.15673	1.15673	-1.15673	2	1.2095	1.2095	0.790504
2.9665	2966.5	1	2.0401	2.0401	-1.0401	1	0.303231	0.303231	0.696769	0	1.12237	1.12237	-1.12237	1	1.19885	1.19885	-0.198846
2.9765	2976.5	0	2.028	2.028	-2.028	0	0.29164	0.29164	-0.29164	0	1.08801	1.08801	-1.08801	1	1.1882	1.1882	-0.188196
2.9865	2986.5	0	2.0159	2.0159	-2.0159	2	0.280048	0.280048	1.71995	1	1.05364	1.05364	-0.0536408	0	1.17755	1.17755	-1.17755
2.9965	2996.5	0	2.0038	2.0038	-2.0038	1	0.268457	0.268457	0.731543	0	1.01928	1.01928	-1.01928	1	1.1669	1.1669	-0.166896
3.0065	3006.5	1	1.9917	1.9917	-0.991697	0	0.256866	0.256866	-0.256866	0	0.984912	0.984912	-0.984912	2	1.15625	1.15625	0.843754
3.0165	3016.5	1	1.9796	1.9796	-0.979596	0	0.245275	0.245275	-0.245275	1	0.950547	0.950547	0.0494525	2	1.1456	1.1456	0.854404
3.0265	3026.5	2	1.96749	1.96749	0.0325056	0	0.233684	0.233684	-0.233684	1	0.916183	0.916183	0.083817	0	1.13495	1.13495	-1.13495
3.0365	3036.5	0	1.95539	1.95539	-1.95539	1	0.222093	0.222093	0.777907	1	0.881818	0.881818	0.118181	0	1.1243	1.1243	-1.1243
3.0465	3046.5	3	1.94329	1.94329	1.05671	1	0.210502	0.210502	0.789498	1	0.847454	0.847454	0.152546	1	1.11365	1.11365	-0.113646
3.0565	3056.5	5	1.93119	1.93119	3.06881	0	0.19891	0.19891	-0.19891	0	0.81309	0.81309	-0.81309	0	1.103	1.103	-1.103
3.0665	3066.5	0	1.91909	1.91909	-1.91909	1	0.187319	0.187319	0.812681	2	0.778725	0.778725	1.22128	2	1.09234	1.09234	0.907655
3.0765	3076.5	3	1.90699	1.90699	1.09301	4	0.175728	0.175728	3.82427	1	0.744361	0.744361	0.255639	1	1.0817	1.0817	-0.0816954
3.0865	3086.5	1	1.89488	1.89488	-0.894885	1	0.164137	0.164137	0.835863	0	0.709996	0.709996	-0.709996	1	1.07105	1.07105	-0.0710454
3.0965	3096.5	1	1.88278	1.88278	-0.882784	1	0.152546	0.152546	0.847454	0	0.675632	0.675632	-0.675632	0	1.06039	1.06039	-1.06039
3.1065	3106.5	0	1.87068	1.87068	-1.87068	1	0.140955	0.140955	0.859045	3	0.641267	0.641267	2.35873	0	1.04974	1.04974	-1.04974
3.1165	3116.5	2	1.85858	1.85858	0.141418	0	0.129364	0.129364	-0.129364	1	0.606888	0.606888	0.393112	1	1.03912	1.03912	-0.0391235
3.1265	3126.5	0	1.82666	1.82666	-1.82666	0	0.191681	0.191681	-0.191681	0	0.660812	0.660812	-0.660812	0	1.13168	1.13168	-1.13168
3.1365	3136.5	0	1.79464	1.79464	-1.79464	0	0.250824	0.250824	-0.250824	1	0.71199	0.71199	0.28801	4	1.21854	1.21854	2.78146
3.1465	3146.5	2	1.76253	1.76253	0.237474	0	0.306854	0.306854	-0.306854	1	0.760452	0.760452	0.239548	0	1.29974	1.29974	-1.29974
3.1565	3156.5	4	1.73031	1.73031	2.26969	1	0.359802	0.359802	0.640198	0	0.806198	0.806198	-0.806198	3	1.3753	1.3753	1.6247
3.1665	3166.5	4	1.69801	1.69801	2.30199	0	0.409546	0.409546	-0.409546	0	0.849182	0.849182	-0.849182	2	1.44516	1.44516	0.55484
3.1765	3176.5	1	1.6656	1.6656	-0.665603	0	0.456177	0.456177	-0.456177	2	0.88945	0.88945	1.11055	1	1.50934	1.50934	-0.509338
3.1865	3186.5	1	1.6331	1.6331	-0.633103	0	0.499695	0.499695	-0.499695	2	0.927017	0.927017	1.07298	1	1.56787	1.56787	-0.567871
3.1965	3196.5	3	1.60051	1.60051	1.39949	2	0.540039	0.540039	1.45996	1	0.961807	0.961807	0.0381927	1	1.62073	1.62073	-0.620727
3.2065	3206.5	4	1.56781	1.56781	2.43219	0	0.577301	0.577301	-0.577301	1	0.993896	0.993896	0.00610352	0	1.66788	1.66788	-1.66788
3.2165	3216.5	1	1.53503	1.53503	-0.535027	1	0.611359	0.611359	0.388641	0	1.02325	1.02325	-1.02325	2	1.70935	1.70935	0.290649
3.2265	3226.5	1	1.50214	1.50214	-0.502142	0	0.642365	0.642365	-0.642365	1	1.04985	1.04985	-0.0498505	2	1.74515	1.74515	0.254852
3.2365	3236.5	0	1.46916	1.46916	-1.46916	2	0.670196	0.670196	1.3298	1	1.07376	1.07376	-0.073761	2	1.77527	1.77527	0.224731
3.2465	3246.5	1	1.43609	1.43609	-0.436085	0	0.694946	0.694946	-0.694946	1	1.09494	1.09494	-0.0949402	0	1.79974	1.79974	-1.79974
3.2565	3256.5	0	1.40291	1.40291	-1.40291	1	0.716492	0.716492	0.283508	2	1.11337	1.11337	0.886627	2	1.81854	1.81854	0.181457
3.2665	3266.5	3	1.36964	1.36964	1.63036	2	0.734955	0.734955	1.26504	2	1.12907	1.12907	0.870926	2	1.83163	1.83163	0.168366
3.2765	3276.5	0	1.33628	1.33628	-1.33628	2	0.750244	0.750244	1.24976	0	1.14206	1.14206	-1.14206	3	1.83905	1.83905	1.16095
3.2865	3286.5	2	1.30282	1.30282	0.697185	0	0.762451	0.762451	-0.762451	1	1.15233	1.15233	-0.152329	1	1.84082	1.84082	-0.84082
3.2965	3296.5	1	1.26926	1.26926	-0.269257	0	0.771484	0.771484	-0.771484	0	1.15982	1.15982	-1.15982	0	1.83685	1.83685	-1.83685
3.3065	3306.5	2	1.2356	1.2356	0.764397	1	0.777466	0.777466	0.222534	1	1.16463	1.16463	-0.164627	3	1.82733	1.82733	1.17267
3.3165	3316.5	2	1.20185	1.20185	0.798146	0	0.780182	0.780182	-0.780182	3	1.1667	1.1667	1.8333	1	1.81201	1.81201	-0.812012
3.3265	3326.5	0	1.16801	1.16801	-1.16801	2	0.779877	0.779877	1.22012	1	1.166	1.166	-0.166	4	1.79108	1.79108	2.20892
3.3365	3336.5	0	1.13407	1.13407	-1.13407	0	0.776367	0.776367	-0.776367	1	1.16261	1.16261	-0.162613	1	1.7644	1.7644	-0.764404
3.3465	3346.5	0	1.10003	1.10003	-1.10003	1	0.769775	0.769775	0.230225	1	1.15649	1.15649	-0.156494	4	1.73212	1.73212	2.26788
3.3565	3356.5	1	1.06589	1.06589	-0.0658922	1	0.76001	0.76001	0.23999	0	1.14763	1.14763	-1.14763	1	1.69415	1.69415	-0.694153
3.3665	3366.5	0	1.03166	1.03166	-1.03166	1	0.747162	0.747162	0.252838	3	1.13606	1.13606	1.86394	2	1.65051	1.65051	0.349487
3.3765	3376.5	1	0.997333	0.997333	0.00266647	0	0.73114	0.73114	-0.73114	2	1.12173	1.12173	0.878265	1	1.60107	1.60107	-0.601074
3.3865	3386.5	0	0.96291	0.96291	-0.96291	0	0.712036	0.712036	-0.712036	0	1.10468	1.10468	-1.10468	1	1.54608	1.54608	-0.546081
3.3965	3396.5	1	0.928391	0.928391	0.0716095	0	0.689728	0.689728	-0.689728	0	1.08493	1.08493	-1.08493	2	1.48541	1.48541	0.514587
3.4065	3406.5	2	0.893775	0.893775	1.10623	0	0.664337	0.664337	-0.664337	1	1.06241	1.06241	-0.0624084	3	1.41907	1.41907	1.58093
3.4165	3416.5	3	0.859064	0.859064	2.14094	1	0.635773	0.635773	0.364227	0	1.03714	1.03714	-1.03714	2	1.34699	1.34699	0.653015
3.4265	3426.5	0	0.824256	0.824256	-0.824256	2	0.604126	0.604126	1.39587	1	1.00925	1.00925	-0.00924683	1	1.26929	1.26929	-0.269287
3.4365	3436.5	3	0.789352	0.789352	2.21065	0	0.569305	0.569305	-0.569305	2	0.978516	0.978516	1.02148	1	1.18591	1.18591	-0.185913
3.4465	3446.5	0	0.754351	0.754351	-0.754351	1	0.531403	0.531403	0.468597	2	0.945129	0.945129	1.05487	0	1.09674	1.09674	-1.09674
3.4565	3456.5	2	0.719255	0.719255	1.28075	0	0.490326	0.490326	-0.490326	1	0.908997	0.908997	0.0910034	0	1.00201	1.00201	-1.00201
3.4665	3466.5	1	0.684063	0.684063	0.315937	0	0.446167	0.446167	-0.446167	1	0.870117	0.870117	0.129883	2	0.901611	0.901611	1.09839
3.4765	3476.5	0	0.648773	0.648773	-0.648773	0	0.398773	0.398773	-0.398773	1	0.828491	0.828491	0.171509	0	0.795471	0.795471	-0.795471
3.4865	3486.5	1	0.613389	0.613389	0.386611	0	0.348358	0.348358	-0.348358	0	0.78421	0.78421	-0.78421	0	0.683716	0.683716	-0.683716
3.4965	3496.5	0	0.577908	0.577908	-0.577908	0	0.294739	0.294739	-0.294739	1	0.737122	0.737122	0.262878	0	0.566284	0.566284	-0.566284
3.5065	3506.5	0	0.542331	0.543874	-0.543874	1	0.238037	0.239635	0.760365	0	0.687286	0.689348	-0.689348	2	0.443176	0.444789	1.55521
3.5165	3516.5	0	0.506656	0.510181	-0.510181	1	0.178162	0.181814	0.818186	1	0.634766	0.639476	0.360524	0	0.314392	0.318076	-0.318076
3.5265	3526.5	2	0.470888	0.47858	1.52142	2	0.115143	0.123111	1.87689	2	0.579498	0.589775	1.41023	0	0.179871	0.187909	-0.187909
3.5365	3536.5	1	0.477668	0.493688	0.506312	1	0.118835	0.135431	0.864569	0	0.578761	0.600166	-0.600166	1	0.184195	0.200936	0.799064
3.5465	3546.5	0	0.484447	0.516304	-0.516304	2	0.122527	0.155528	1.84447	2	0.578023	0.620588	1.37941	1	0.188519	0.22181	0.77819
3.5565	3556.5	1	0.491227	0.551707	0.448293	1	0.126219	0.188871	0.811129	2	0.577286	0.658093	1.34191	2	0.192843	0.256046	1.74395
3.5665	3566.5	1	0.498006	0.607626	0.392373	1	0.129911	0.243469	0.756531	1	0.576548	0.723012	0.276988	1	0.197166	0.311723	0.688277
3.5765	3576.5	1	0.504786	0.694476	0.305524	0	0.133603	0.330107	-0.330107	1	0.575811	0.829255	0.170745	0	0.20149	0.399722	-0.399722
3.5865	3586.5	2	0.511565	0.824947	1.17505	0	0.137295	0.461933	-0.461933	3	0.575073	0.993781	2.00622	0	0.205815	0.533307	-0.533307
3.5965	3596.5	0	0.518345	1.01263	-1.01263	1	0.140987	0.653025	0.346975	0	0.574336	1.23475	-1.23475	0	0.210138	0.726678	-0.726678
3.6065	3606.5	1	0.525124	1.26943	-0.269433	2	0.144679	0.915725	1.08428	0	0.573598	1.56807	-1.56807	2	0.214462	0.992286	1.00771
3.6165	3616.5	2	0.531904	1.60196	0.398042	2	0.148371	1.25686	0.743138	3	0.572861	2.00256	0.997445	2	0.218786	1.33702	0.662978
3.6265	3626.5	2	0.538683	2.00738	-0.00738144	1	0.152063	1.67352	-0.673518	5	0.572123	2.53444	2.46556	2	0.22311	1.75794	0.24206
3.6365	3636.5	5	0.545462	2.47004	2.52996	3	0.155755	2.14946	0.850541	3	0.571386	3.1428	-0.142798	1	0.227434	2.23867	-1.23866
3.6465	3646.5	2	0.552242	2.95999	-0.959988	4	0.159447	2.65368	1.34632	1	0.570648	3.78763	-2.78763	0	0.231758	2.74792	-2.74792
3.6565	3656.5	1	0.559021	3.43484	-2.43484	2	0.163139	3.14226	-1.14226	1	0.569911	4.41228	-3.41228	1	0.236082	3.24139	-2.24139
3.6665	3666.5	3	0.565801	3.84515	-0.845152	5	0.166831	3.56398	1.43602	6	0.569173	4.9507	1.0493	3	0.240406	3.66742	-0.667417
3.6765	3676.5	3	0.572581	4.14275	-1.14275	1	0.170523	3.86894	-2.86894	4	0.568436	5.33852	-1.33852	4	0.24473	3.97566	0.0243454
3.6865	3686.5	4	0.57936	4.29014	-0.290135	3	0.174215	4.01828	-1.01828	4	0.567698	5.52565	-1.52565	2	0.249054	4.12692	-2.12691
3.6965	3696.5	2	0.58614	4.26841	-2.26841	4	0.177907	3.99245	0.00755548	5	0.566961	5.48682	-0.486823	5	0.253378	4.10145	0.898551
3.7065	3706.5	7	0.592919	4.08144	2.91856	3	0.181599	3.79543	-0.795427	9	0.566223	5.22722	3.77278	4	0.257702	3.9033	0.0967009
3.7165	3716.5	2	0.599699	3.75501	-1.755	3	0.185291	3.45394	-0.453939	7	0.565486	4.78128	2.21872	7	0.262026	3.55941	3.44059
3.7265	3726.5	1	0.606478	3.33117	-2.33117	3	0.188983	3.01155	-0.0115457	1	0.564748	4.20519	-3.20519	5	0.26635	3.11373	1.88627
3.7365	3736.5	7	0.613258	2.85956	4.14044	3	0.192675	2.51966	0.480338	7	0.564011	3.56528	3.43472	4	0.270674	2.61812	1.38188
3.7465	3746.5	5	0.620037	2.38808	2.61192	2	0.196368	2.02792	-0.0279195	5	0.563273	2.92555	2.07445	1	0.274998	2.12265	-1.12265
3.7565	3756.5	2	0.626816	1.95541	0.0445871	8	0.20006	1.57638	6.42362	0	0.562536	2.33767	-2.33767	1	0.279322	1.66774	-0.667742
3.7665	3766.5	4	0.633596	1.58676	2.41324	0	0.203752	1.19115	-1.19115	2	0.561799	1.83532	0.164681	2	0.283646	1.27973	0.72027
3.7765	3776.5	3	0.640375	1.29323	1.70677	0	0.207444	0.883752	-0.883752	0	0.561061	1.43334	-1.43334	1	0.28797	0.970224	0.0297761
3.7865	3786.5	1	0.647155	1.07407	-0.0740719	2	0.211136	0.653388	1.34661	1	0.560324	1.13072	-0.130725	1	0.292294	0.738434	0.261566
3.7965	3796.5	1	0.653934	0.920463	0.0795374	2	0.214828	0.49093	1.50907	2	0.559586	0.915693	1.08431	0	0.296618	0.575147	-0.575147
3.8065	3806.5	1	0.660714	0.819575	0.180425	1	0.21852	0.383087	0.616913	2	0.558849	0.771102	1.2289	3	0.300942	0.466956	2.53304
3.8165	3816.5	0	0.667493	0.757893	-0.757893	0	0.222212	0.315859	-0.315859	1	0.558111	0.678894	0.321106	1	0.305266	0.399736	0.600264
3.8265	3826.5	1	0.674273	0.723592	0.276408	1	0.225904	0.276994	0.723005	0	0.557374	0.623269	-0.623269	1	0.30959	0.36113	0.63887
3.8365	3836.5	0	0.681052	0.706986	-0.706986	0	0.229596	0.256461	-0.256461	1	0.556636	0.591286	0.408714	4	0.313914	0.341015	3.65898
3.8465	3846.5	2	0.687832	0.701425	1.29858	0	0.233288	0.24737	-0.24737	0	0.555899	0.574061	-0.574061	1	0.318238	0.332444	0.667556
3.8565	3856.5	0	0.694611	0.702571	-0.702571	1	0.23698	0.245226	0.754775	1	0.555161	0.565796	0.434204	0	0.322562	0.33088	-0.33088
3.8665	3866.5	1	0.701391	0.707978	0.292022	0	0.240672	0.247496	-0.247496	0	0.554424	0.563225	-0.563225	0	0.326886	0.33377	-0.33377
3.8765	3876.5	1	0.70817	0.715447	0.284553	0	0.244364	0.251902	-0.251902	1	0.553686	0.563409	0.436591	1	0.33121	0.338815	0.661185
3.8865	3886.5	0	0.71495	0.727963	-0.727963	1	0.248056	0.261537	0.738463	1	0.552949	0.570336	0.429664	0	0.335534	0.349133	-0.349133
3.8965	3896.5	0	0.721729	0.744008	-0.744008	0	0.251748	0.274827	-0.274827	1	0.552211	0.581977	0.418023	1	0.339858	0.36314	0.636861
3.9065	3906.5	0	0.728509	0.765019	-0.765019	0	0.25544	0.293262	-0.293262	0	0.551474	0.600255	-0.600255	3	0.344182	0.382337	2.61766
3.9165	3916.5	1	0.735288	0.792568	0.207432	1	0.259132	0.318469	0.681531	0	0.550736	0.627267	-0.627267	2	0.348506	0.408365	1.59163
3.9265	3926.5	0	0.742068	0.828092	-0.828092	1	0.262824	0.351939	0.648061	0	0.549999	0.664936	-0.664936	0	0.35283	0.442728	-0.442728
3.9365	3936.5	1	0.748847	0.872524	0.127476	0	0.266516	0.394636	-0.394636	0	0.549261	0.714506	-0.714506	0	0.357154	0.4864	-0.4864
3.9465	3946.5	3	0.755627	0.925843	2.07416	0	0.270208	0.446539	-0.446539	4	0.548524	0.775949	3.22405	1	0.361478	0.539358	0.460642
3.9565	3956.5	4	0.762406	0.986669	3.01333	0	0.2739	0.506218	-0.506218	1	0.547786	0.847422	0.152578	0	0.365802	0.600162	-0.600162
3.9665	3966.5	1	0.769186	1.05204	-0.0520356	0	0.277592	0.570602	-0.570602	0	0.547049	0.924963	-0.924963	1	0.370126	0.665712	0.334288
3.9765	3976.5	0	0.775965	1.11747	-1.11747	0	0.281284	0.635058	-0.635058	0	0.546311	1.0026	-1.0026	1	0.37445	0.731334	0.268666
3.9865	3986.5	3	0.782745	1.17746	1.82254	2	0.284976	0.693873	1.30613	0	0.545574	1.07296	-1.07296	2	0.378774	0.791265	1.20873
3.9965	3996.5	1	0.789524	1.22626	-0.226261	1	0.288668	0.741093	0.258908	0	0.544836	1.12836	-1.12836	1	0.383098	0.839499	0.160501
4.0065	4006.5	3	0.796304	1.25889	1.74111	1	0.29236	0.771566	0.228434	0	0.544099	1.16216	-1.16216	1	0.387422	0.87084	0.12916
4.0165	4016.5	1	0.803083	1.27213	-0.272129	2	0.296052	0.781947	1.21805	1	0.543361	1.17005	-0.170052	1	0.391746	0.881912	0.118088
4.0265	4026.5	2	0.809863	1.26514	0.734856	1	0.299744	0.771379	0.228621	2	0.542624	1.15092	0.849077	1	0.39607	0.871851	0.128149
4.0365	4036.5	2	0.816642	1.23969	0.760311	2	0.303436	0.741679	1.25832	3	0.541886	1.10712	1.89288	1	0.400394	0.842489	0.157511
4.0465	4046.5	3	0.823422	1.19973	1.80027	0	0.307129	0.696951	-0.696951	0	0.541149	1.04393	-1.04393	0	0.404718	0.797967	-0.797967
4.0565	4056.5	3	0.830201	1.15063	1.84937	0	0.31082	0.642763	-0.642763	0	0.540411	0.96854	-0.96854	3	0.409042	0.743903	2.2561
4.0665	4066.5	0	0.836981	1.09818	-1.09818	0	0.314512	0.585098	-0.585098	0	0.539674	0.888665	-0.888665	0	0.413366	0.68633	-0.68633
4.0765	4076.5	0	0.84376	1.04759	-1.04759	0	0.318205	0.529353	-0.529353	0	0.538936	0.811269	-0.811269	1	0.41769	0.630695	0.369305
4.0865	4086.5	1	0.85054	1.0028	-0.00280142	0	0.321897	0.479628	-0.479628	1	0.538199	0.741635	0.258365	0	0.422014	0.581131	-0.581131
4.0965	4096.5	2	0.857319	0.966203	1.0338	1	0.325589	0.438384	0.561616	0	0.537462	0.682941	-0.682941	1	0.426338	0.540124	0.459876
4.1065	4106.5	0	0.864099	0.938637	-0.938637	0	0.329281	0.406497	-0.406497	1	0.536724	0.636315	0.363685	0	0.430662	0.508556	-0.508556
4.1165	4116.5	2	0.870878	0.919725	1.08027	2	0.332973	0.383575	1.61643	1	0.535987	0.601251	0.398749	4	0.434986	0.486033	3.51397
4.1265	4126.5	1	0.877658	0.908302	0.0916983	2	0.336665	0.36841	1.63159	0	0.535249	0.576192	-0.576192	1	0.43931	0.471334	0.528666
4.1365	4136.5	0	0.884437	0.90284	-0.90284	2	0.340357	0.359421	1.64058	3	0.534512	0.5591	2.4409	0	0.443634	0.462866	-0.462866
4.1465	4146.5	0	0.891217	0.901797	-0.901797	0	0.344049	0.355009	-0.355009	2	0.533774	0.54791	1.45209	0	0.447958	0.459014	-0.459014
4.1565	4156.5	1	0.897996	0.903819	0.0961812	0	0.347741	0.353773	-0.353773	1	0.533037	0.540816	0.459184	2	0.452282	0.458367	1.54163
4.1665	4166.5	0	0.904776	0.907843	-0.907843	0	0.351433	0.354611	-0.354611	0	0.532299	0.536398	-0.536398	0	0.456606	0.459811	-0.459811
4.1765	4176.5	1	0.911555	0.913102	0.0868977	2	0.355125	0.356728	1.64327	1	0.531562	0.533629	0.466371	0	0.46093	0.462547	-0.462547
4.1865	4186.5	1	0.918335	0.919082	0.0809184	0	0.358817	0.359591	-0.359591	1	0.530824	0.531822	0.468178	1	0.465254	0.466034	0.533966
4.1965	4196.5	2	0.925114	0.925459	1.07454	0	0.362509	0.362867	-0.362867	0	0.530087	0.530548	-0.530548	0	0.469578	0.469938	-0.469938
4.2065	4206.5	0	0.931894	0.931894	-0.931894	0	0.366201	0.366201	-0.366201	0	0.529349	0.529349	-0.529349	1	0.473902	0.473902	0.526098
4.2165	4216.5	1	0.938673	0.938673	0.0613269	0	0.369893	0.369893	-0.369893	2	0.528612	0.528612	1.47139	1	0.478226	0.478226	0.521774
4.2265	4226.5	0	0.945453	0.945453	-0.945453	0	0.373585	0.373585	-0.373585	2	0.527874	0.527874	1.47213	0	0.48255	0.48255	-0.48255
4.2365	4236.5	1	0.952232	0.952232	0.0477679	0	0.377277	0.377277	-0.377277	1	0.527137	0.527137	0.472863	0	0.486874	0.486874	-0.486874
4.2465	4246.5	1	0.959012	0.959012	0.0409885	1	0.380969	0.380969	0.619031	0	0.526399	0.526399	-0.526399	0	0.491198	0.491198	-0.491198
4.2565	4256.5	1	0.965791	0.965791	0.034209	0	0.384661	0.384661	-0.384661	0	0.525662	0.525662	-0.525662	1	0.495522	0.495522	0.504479
4.2665	4266.5	2	0.972571	0.972571	1.02743	0	0.388353	0.388353	-0.388353	0	0.524924	0.524924	-0.524924	0	0.499846	0.499846	-0.499846
4.2765	4276.5	3	0.97935	0.97935	2.02065	1	0.392045	0.392045	0.607955	0	0.524187	0.524187	-0.524187	2	0.50417	0.50417	1.49583
4.2865	4286.5	2	0.986129	0.986129	1.01387	1	0.395737	0.395737	0.604263	0	0.523449	0.523449	-0.523449	0	0.508494	0.508494	-0.508494
4.2965	4296.5	0	0.992909	0.992909	-0.992909	1	0.399429	0.399429	0.600571	0	0.522712	0.522712	-0.522712	0	0.512817	0.512817	-0.512817
4.3065	4306.5	1	0.999688	0.999688	0.000311494	0	0.403121	0.403121	-0.403121	1	0.521974	0.521974	0.478026	0	0.517141	0.517141	-0.517141
4.3165	4316.5	0	1.00647	1.00647	-1.00647	0	0.406813	0.406813	-0.406813	0	0.521237	0.521237	-0.521237	1	0.521465	0.521465	0.478535
4.3265	4326.5	3	1.01325	1.01325	1.98675	0	0.410505	0.410505	-0.410505	0	0.520499	0.520499	-0.520499	0	0.525789	0.525789	-0.525789
4.3365	4336.5	0	1.02003	1.02003	-1.02003	0	0.414197	0.414197	-0.414197	0	0.519762	0.519762	-0.519762	0	0.530113	0.530113	-0.530113
4.3465	4346.5	0	1.02681	1.02681	-1.02681	0	0.417889	0.417889	-0.417889	1	0.519024	0.519024	0.480976	1	0.534437	0.534437	0.465563
4.3565	4356.5	0	1.03359	1.03359	-1.03359	0	0.421581	0.421581	-0.421581	0	0.518287	0.518287	-0.518287	0	0.538761	0.538761	-0.538761
4.3665	4366.5	2	1.04037	1.04037	0.959634	0	0.425273	0.425273	-0.425273	0	0.517549	0.517549	-0.517549	0	0.543085	0.543085	-0.543085
4.3765	4376.5	0	1.04714	1.04714	-1.04714	1	0.428965	0.428965	0.571035	0	0.516812	0.516812	-0.516812	4	0.547409	0.547409	3.45259
4.3865	4386.5	0	1.05393	1.05393	-1.05393	1	0.432657	0.432657	0.567342	2	0.516074	0.516074	1.48393	1	0.551733	0.551733	0.448267
4.3965	4396.5	2	1.0607	1.0607	0.939295	0	0.43635	0.43635	-0.43635	1	0.515337	0.515337	0.484663	1	0.556057	0.556057	0.443943
4.4065	4406.5	0	1.06748	1.06748	-1.06748	1	0.440042	0.440042	0.559959	0	0.514599	0.514599	-0.514599	1	0.560381	0.560381	0.439619
4.4165	4416.5	0	1.07426	1.07426	-1.07426	1	0.443734	0.443734	0.556266	0	0.513862	0.513862	-0.513862	1	0.564705	0.564705	0.435295
4.4265	4426.5	4	1.08104	1.08104	2.91896	1	0.447426	0.447426	0.552574	1	0.513124	0.513124	0.486876	1	0.569029	0.569029	0.430971
4.4365	4436.5	0	1.08782	1.08782	-1.08782	1	0.451118	0.451118	0.548882	1	0.512387	0.512387	0.487613	0	0.573353	0.573353	-0.573353
4.4465	4446.5	3	1.0946	1.0946	1.9054	2	0.45481	0.45481	1.54519	1	0.511649	0.511649	0.488351	2	0.577677	0.577677	1.42232
4.4565	4456.5	1	1.10138	1.10139	-0.101389	1	0.458502	0.458515	0.541485	1	0.510912	0.510947	0.489053	0	0.582001	0.582008	-0.582008
4.4665	4466.5	1	1.10816	1.10818	-0.108177	2	0.462194	0.462223	1.53778	1	0.510174	0.510251	0.48975	1	0.586325	0.586341	0.413659
4.4765	4476.5	0	1.11494	1.11497	-1.11497	0	0.465886	0.465946	-0.465946	0	0.509437	0.509594	-0.509594	2	0.590649	0.590681	1.40932
4.4865	4486.5	2	1.12172	1.12178	0.878216	0	0.469578	0.469698	-0.469698	1	0.508699	0.509012	0.490988	1	0.594973	0.595038	0.404962
4.4965	4496.5	3	1.1285	1.12862	1.87138	2	0.47327	0.4735	1.5265	1	0.507962	0.50856	0.49144	2	0.599297	0.599421	1.40058
4.5065	4506.5	1	1.13528	1.1355	-0.135504	2	0.476962	0.477385	1.52262	2	0.507224	0.508325	1.49168	2	0.603621	0.60385	1.39615
4.5165	4516.5	1	1.14206	1.14246	-0.142457	2	0.480654	0.481402	1.5186	5	0.506487	0.508433	4.49157	3	0.607944	0.60835	2.39165
4.5265	4526.5	5	1.14884	1.14952	3.85048	0	0.484346	0.485619	-0.485619	3	0.505749	0.509059	2.49094	2	0.612268	0.612958	1.38704
4.5365	4536.5	0	1.15562	1.15672	-1.15672	2	0.488038	0.490119	1.50988	2	0.505012	0.510424	1.48958	1	0.616592	0.61772	0.38228
4.5465	4546.5	3	1.1624	1.16414	1.83586	1	0.49173	0.495004	0.504996	1	0.504274	0.512788	0.487212	1	0.620916	0.622691	0.37731
4.5565	4556.5	0	1.16918	1.17181	-1.17181	0	0.495422	0.500374	-0.500374	1	0.503537	0.516414	0.483586	0	0.62524	0.627924	-0.627924
4.5665	4566.5	0	1.17596	1.17978	-1.17978	0	0.499114	0.506317	-0.506317	0	0.502799	0.521531	-0.521531	0	0.629564	0.633468	-0.633468
4.5765	4576.5	1	1.18274	1.18809	-0.188088	0	0.502806	0.512883	-0.512883	1	0.502062	0.528266	0.471734	1	0.633888	0.639349	0.360651
4.5865	4586.5	1	1.18952	1.19672	-0.196716	1	0.506498	0.520055	0.479945	0	0.501324	0.536578	-0.536578	1	0.638212	0.645559	0.354441
4.5965	4596.5	1	1.1963	1.20561	-0.205611	0	0.51019	0.527729	-0.527729	1	0.500587	0.546196	0.453804	0	0.642536	0.652041	-0.652041
4.6065	4606.5	1	1.20307	1.21467	-0.214665	2	0.513882	0.535705	1.46429	0	0.49985	0.556597	-0.556597	1	0.64686	0.658686	0.341314
4.6165	4616.5	1	1.20985	1.22372	-0.223722	0	0.517574	0.543686	-0.543686	0	0.499112	0.567012	-0.567012	1	0.651184	0.665334	0.334666
4.6265	4626.5	0	1.21663	1.23259	-1.23259	0	0.521266	0.551312	-0.551312	0	0.498374	0.576506	-0.576506	3	0.655508	0.67179	2.32821
4.6365	4636.5	1	1.22341	1.24107	-0.241072	1	0.524958	0.558207	0.441793	2	0.497637	0.584097	1.4159	2	0.659832	0.67785	1.32215
4.6465	4646.5	1	1.23019	1.24899	-0.248985	0	0.52865	0.564033	-0.564033	0	0.496899	0.58891	-0.58891	1	0.664156	0.68333	0.31667
4.6565	4656.5	2	1.23697	1.2562	0.743796	1	0.532342	0.568554	0.431446	0	0.496162	0.590327	-0.590327	0	0.66848	0.688103	-0.688103
4.6665	4666.5	1	1.24375	1.26268	-0.26268	1	0.536034	0.571674	0.428326	0	0.495424	0.588103	-0.588103	1	0.672804	0.692118	0.307883
4.6765	4676.5	1	1.25053	1.26845	-0.268445	0	0.539727	0.57346	-0.57346	0	0.494685	0.582405	-0.582405	0	0.677129	0.695409	-0.695409
4.6865	4686.5	1	1.24142	1.25773	-0.257727	1	0.539926	0.570631	0.429368	0	0.497732	0.577578	-0.577578	1	0.675316	0.691955	0.308045
4.6965	4696.5	4	1.23237	1.24665	2.75335	1	0.540112	0.56699	0.43301	0	0.500749	0.570642	-0.570642	2	0.67353	0.688095	1.31191
4.7065	4706.5	0	1.22339	1.2354	-1.2354	0	0.540282	0.562909	-0.562909	0	0.503734	0.562571	-0.562571	0	0.671771	0.684032	-0.684032
4.7165	4716.5	1	1.21446	1.22419	-0.224188	0	0.540439	0.558756	-0.558756	1	0.506687	0.55432	0.44568	1	0.670039	0.679966	0.320034
4.7265	4726.5	0	1.2056	1.21317	-1.21317	0	0.540581	0.554842	-0.554842	0	0.509608	0.546692	-0.546692	3	0.668334	0.676062	2.32394
4.7365	4736.5	0	1.1968	1.20247	-1.20247	0	0.540709	0.551386	-0.551386	0	0.512497	0.540263	-0.540263	1	0.666655	0.672441	0.327559
4.7465	4746.5	3	1.18806	1.19214	1.80786	0	0.540822	0.54851	-0.54851	1	0.515356	0.535347	0.464653	0	0.665004	0.66917	-0.66917
4.7565	4756.5	0	1.17938	1.1822	-1.1822	0	0.540921	0.546244	-0.546244	1	0.518183	0.532026	0.467974	1	0.663379	0.666264	0.333736
4.7665	4766.5	3	1.17076	1.17264	1.82736	0	0.541005	0.54455	-0.54455	1	0.520977	0.530196	0.469804	2	0.66178	0.663701	1.3363
4.7765	4776.5	0	1.1622	1.16341	-1.16341	2	0.541075	0.543345	1.45666	1	0.52374	0.529644	0.470356	0	0.66021	0.66144	-0.66144
4.7865	4786.5	1	1.15371	1.15445	-0.154452	1	0.54113	0.542528	0.457472	0	0.526471	0.530107	-0.530107	0	0.658665	0.659423	-0.659423
4.7965	4796.5	1	1.14528	1.14572	-0.145718	1	0.541171	0.541999	0.458001	0	0.529171	0.531324	-0.531324	1	0.657148	0.657597	0.342403
4.8065	4806.5	1	1.13691	1.13716	-0.137158	0	0.541198	0.541669	-0.541669	0	0.531839	0.533066	-0.533066	0	0.655657	0.655912	-0.655912
4.8165	4816.5	1	1.1286	1.12873	-0.128735	0	0.54121	0.541468	-0.541468	0	0.534476	0.535147	-0.535147	1	0.654193	0.654333	0.345667
4.8265	4826.5	2	1.12035	1.12042	0.879578	1	0.541208	0.541344	0.458656	0	0.537081	0.537435	-0.537435	1	0.652756	0.652829	0.34717
4.8365	4836.5	1	1.11216	1.1122	-0.1122	0	0.541191	0.54126	-0.54126	0	0.539653	0.539832	-0.539832	0	0.651345	0.651383	-0.651383
4.8465	4846.5	2	1.10404	1.10406	0.895942	1	0.541159	0.541193	0.458807	2	0.542194	0.542282	1.45772	1	0.649962	0.649981	0.350019
4.8565	4856.5	0	1.09598	1.09598	-1.09598	0	0.541114	0.541114	-0.541114	1	0.544704	0.544704	0.455296	0	0.648606	0.648606	-0.648606
4.8665	4866.5	2	1.08798	1.08798	0.912025	1	0.541054	0.541054	0.458946	1	0.547182	0.547182	0.452818	0	0.647276	0.647276	-0.647276
4.8765	4876.5	2	1.08004	1.08004	0.919964	1	0.54098	0.54098	0.45902	0	0.549628	0.549628	-0.549628	0	0.645973	0.645973	-0.645973
4.8865	4886.5	1	1.07216	1.07216	-0.0721569	1	0.540891	0.540891	0.459109	2	0.552042	0.552042	1.44796	0	0.644697	0.644697	-0.644697
4.8965	4896.5	3	1.06434	1.06434	1.93566	1	0.540787	0.540787	0.459213	0	0.554426	0.554426	-0.554426	0	0.643447	0.643447	-0.643447
4.9065	4906.5	0	1.05658	1.05658	-1.05658	0	0.54067	0.54067	-0.54067	1	0.556778	0.556778	0.443223	0	0.642225	0.642225	-0.642225
4.9165	4916.5	0	1.04889	1.04889	-1.04889	0	0.540537	0.540537	-0.540537	0	0.559097	0.559097	-0.559097	1	0.641029	0.641029	0.358971
4.9265	4926.5	0	1.04126	1.04126	-1.04126	1	0.540391	0.540391	0.459609	0	0.561385	0.561385	-0.561385	0	0.639861	0.639861	-0.639861
4.9365	4936.5	0	1.03369	1.03369	-1.03369	0	0.54023	0.54023	-0.54023	1	0.563641	0.563641	0.436359	1	0.638719	0.638719	0.361281
4.9465	4946.5	1	1.02618	1.02618	-0.0261793	1	0.540055	0.540055	0.459945	1	0.565866	0.565866	0.434134	0	0.637603	0.637603	-0.637603
4.9565	4956.5	1	1.01873	1.01873	-0.0187311	1	0.539865	0.539865	0.460135	1	0.568059	0.568059	0.431941	0	0.636515	0.636515	-0.636515
4.9665	4966.5	0	1.01135	1.01135	-1.01135	1	0.53966	0.53966	0.46034	1	0.57022	0.57022	0.42978	0	0.635454	0.635454	-0.635454
4.9765	4976.5	0	1.00402	1.00402	-1.00402	0	0.539442	0.539442	-0.539442	1	0.572349	0.572349	0.427651	1	0.634419	0.634419	0.365581
4.9865	4986.5	2	0.996757	0.996757	1.00324	0	0.539209	0.539209	-0.539209	2	0.574447	0.574447	1.42555	0	0.633411	0.633411	-0.633411
4.9965	4996.5	1	0.989557	0.989557	0.0104427	0	0.538961	0.538961	-0.538961	1	0.576514	0.576514	0.423486	0	0.63243	0.63243	-0.63243
5.0065	5006.5	0	0.982417	0.982417	-0.982417	1	0.538699	0.538699	0.461301	0	0.578548	0.578548	-0.578548	0	0.631476	0.631476	-0.631476
5.0165	5016.5	4	0.975339	0.975339	3.02466	1	0.538423	0.538423	0.461577	0	0.580551	0.580551	-0.580551	1	0.630548	0.630548	0.369451
5.0265	5026.5	1	0.968322	0.968322	0.0316782	0	0.538132	0.538132	-0.538132	1	0.582521	0.582521	0.417479	0	0.629648	0.629648	-0.629648
5.0365	5036.5	0	0.961368	0.961368	-0.961368	1	0.537826	0.537826	0.462174	1	0.584461	0.584461	0.415539	0	0.628774	0.628774	-0.628774
5.0465	5046.5	1	0.954472	0.954472	0.0455275	1	0.537507	0.537507	0.462493	0	0.58637	0.58637	-0.58637	0	0.627927	0.627927	-0.627927
5.0565	5056.5	0	0.947641	0.947641	-0.947641	0	0.537173	0.537173	-0.537173	0	0.588246	0.588246	-0.588246	1	0.627107	0.627107	0.372893
5.0665	5066.5	2	0.940872	0.940872	1.05913	1	0.536824	0.536824	0.463176	2	0.590091	0.590091	1.40991	0	0.626314	0.626314	-0.626314
5.0765	5076.5	1	0.934161	0.934161	0.0658388	2	0.536461	0.536461	1.46354	1	0.591903	0.591903	0.408097	2	0.625547	0.625547	1.37445
5.0865	5086.5	2	0.927515	0.927515	1.07248	1	0.536084	0.536084	0.463916	0	0.593684	0.593684	-0.593684	1	0.624807	0.624807	0.375193
5.0965	5096.5	1	0.920929	0.920929	0.079071	1	0.535692	0.535692	0.464308	0	0.595434	0.595434	-0.595434	0	0.624095	0.624095	-0.624095
5.1065	5106.5	0	0.914405	0.914406	-0.914406	0	0.535286	0.535287	-0.535287	0	0.597152	0.597155	-0.597155	3	0.623409	0.623409	2.37659
5.1165	5116.5	0	0.907944	0.907945	-0.907945	0	0.534865	0.534868	-0.534868	0	0.598837	0.598845	-0.598845	0	0.62275	0.622751	-0.622751
5.1265	5126.5	0	0.901541	0.901544	-0.901544	1	0.53443	0.534436	0.465564	2	0.600492	0.600507	1.39949	1	0.622117	0.622121	0.377879
5.1365	5136.5	2	0.895203	0.895208	1.10479	1	0.533981	0.533992	0.466008	0	0.602115	0.602143	-0.602143	1	0.621512	0.621518	0.378482
5.1465	5146.5	1	0.888923	0.888933	0.111067	1	0.533517	0.533537	0.466463	1	0.603706	0.603759	0.396241	2	0.620933	0.620944	1.37906
5.1565	5156.5	3	0.882708	0.882727	2.11727	2	0.533038	0.533075	1.46693	0	0.605266	0.605361	-0.605361	0	0.620381	0.620401	-0.620401
5.1665	5166.5	0	0.876552	0.876585	-0.876585	2	0.532546	0.532609	1.46739	0	0.606793	0.606958	-0.606958	0	0.619856	0.619891	-0.619891
5.1765	5176.5	0	0.87046	0.870516	-0.870516	0	0.532038	0.532145	-0.532145	0	0.608289	0.608566	-0.608566	1	0.619358	0.619416	0.380584
5.1865	5186.5	3	0.864429	0.86452	2.13548	0	0.531517	0.531689	-0.531689	0	0.609754	0.610202	-0.610202	1	0.618887	0.618981	0.38102
5.1965	5196.5	1	0.858457	0.8586	0.1414	0	0.53098	0.531251	-0.531251	1	0.611187	0.61189	0.38811	1	0.618443	0.618589	0.381411
5.2065	5206.5	1	0.85255	0.852767	0.147233	0	0.53043	0.530839	-0.530839	1	0.612588	0.613651	0.386349	1	0.618025	0.618246	0.381754
5.2165	5216.5	1	0.846701	0.847017	0.152982	0	0.529865	0.530462	-0.530462	0	0.613957	0.615508	-0.615508	1	0.617634	0.617957	0.382043
5.2265	5226.5	0	0.840916	0.841362	-0.841362	0	0.529286	0.530126	-0.530126	1	0.615295	0.61748	0.38252	1	0.61727	0.617725	0.382275
5.2365	5236.5	2	0.835191	0.835798	1.1642	0	0.528692	0.529835	-0.529835	0	0.616602	0.619574	-0.619574	2	0.616932	0.617552	1.38245
5.2465	5246.5	1	0.82953	0.830327	0.169673	1	0.528083	0.529584	0.470416	2	0.617876	0.621779	1.37822	0	0.616622	0.617435	-0.617435
5.2565	5256.5	0	0.823929	0.824939	-0.824939	0	0.527461	0.529364	-0.529364	1	0.619119	0.624066	0.375934	1	0.616338	0.617369	0.382631
5.2665	5266.5	3	0.818389	0.819625	2.18038	1	0.526824	0.529152	0.470848	1	0.620329	0.626383	0.373617	0	0.616082	0.617343	-0.617343
5.2765	5276.5	1	0.812912	0.814373	0.185628	0	0.526172	0.528922	-0.528922	2	0.621509	0.62866	1.37134	0	0.615852	0.617342	-0.617342
5.2865	5286.5	0	0.807494	0.80916	-0.80916	0	0.525507	0.528643	-0.528643	0	0.622657	0.630812	-0.630812	0	0.615648	0.617348	-0.617348
5.2965	5296.5	0	0.80214	0.803974	-0.803974	0	0.524826	0.528278	-0.528278	0	0.623773	0.63275	-0.63275	1	0.615472	0.617343	0.382657
5.3065	5306.5	0	0.796846	0.798795	-0.798795	0	0.524131	0.5278	-0.5278	1	0.624857	0.634396	0.365604	1	0.615323	0.617311	0.382689
5.3165	5316.5	1	0.791616	0.793615	0.206385	1	0.523422	0.527185	0.472815	2	0.625909	0.635695	1.36431	2	0.615201	0.61724	1.38276
5.3265	5326.5	1	0.786447	0.788426	0.211574	0	0.522698	0.526425	-0.526425	0	0.626931	0.636622	-0.636622	0	0.615104	0.617124	-0.617124
5.3365	5336.5	0	0.781337	0.783229	-0.783229	0	0.521961	0.525524	-0.525524	1	0.62792	0.637185	0.362815	1	0.615035	0.616966	0.383034
5.3465	5346.5	0	0.776291	0.778037	-0.778037	1	0.521208	0.524496	0.475504	0	0.628878	0.637428	-0.637428	2	0.614993	0.616775	1.38322
5.3565	5356.5	0	0.771304	0.77286	-0.77286	1	0.520441	0.52337	0.47663	0	0.629803	0.63742	-0.63742	0	0.614978	0.616565	-0.616565
5.3665	5366.5	0	0.766381	0.767719	-0.767719	1	0.51966	0.522179	0.477821	0	0.630698	0.637248	-0.637248	0	0.614989	0.616354	-0.616354
5.3765	5376.5	3	0.761519	0.76263	2.23737	0	0.518864	0.520955	-0.520955	0	0.631561	0.636999	-0.636999	2	0.615027	0.616161	1.38384
5.3865	5386.5	2	0.756718	0.757608	1.24239	0	0.518054	0.51973	-0.51973	1	0.632392	0.636751	0.363249	0	0.615093	0.616001	-0.616001
5.3965	5396.5	0	0.75198	0.752669	-0.752669	1	0.517229	0.518526	0.481474	0	0.633191	0.636563	-0.636563	0	0.615185	0.615888	-0.615888
5.4065	5406.5	0	0.747301	0.747815	-0.747815	2	0.51639	0.517359	1.48264	2	0.633958	0.636477	1.36352	0	0.615304	0.615828	-0.615828
5.4165	5416.5	0	0.742685	0.743056	-0.743056	1	0.515537	0.516235	0.483765	0	0.634695	0.636511	-0.636511	1	0.615449	0.615827	0.384173
5.4265	5426.5	0	0.738131	0.738389	-0.738389	1	0.514668	0.515154	0.484845	1	0.635399	0.636663	0.363337	1	0.615622	0.615885	0.384115
5.4365	5436.5	0	0.733638	0.733811	-0.733811	1	0.513787	0.514113	0.485887	1	0.636072	0.636921	0.363079	1	0.615821	0.615998	0.384002
5.4465	5446.5	1	0.729208	0.729321	0.27068	0	0.512889	0.513101	-0.513101	1	0.636713	0.637263	0.362737	1	0.616047	0.616162	0.383838
5.4565	5456.5	1	0.724836	0.724907	0.275093	1	0.511979	0.512111	0.487889	0	0.637321	0.637666	-0.637666	0	0.6163	0.616371	-0.616371
5.4665	5466.5	0	0.72053	0.720572	-0.720572	0	0.511053	0.511133	-0.511133	2	0.637899	0.638107	1.36189	1	0.616579	0.616623	0.383377
5.4765	5476.5	1	0.716282	0.716307	0.283693	0	0.510113	0.51016	-0.51016	0	0.638445	0.638567	-0.638567	0	0.616886	0.616911	-0.616911
5.4865	5486.5	0	0.712096	0.71211	-0.71211	0	0.509159	0.509185	-0.509185	0	0.63896	0.639028	-0.639028	2	0.617219	0.617234	1.38277
5.4965	5496.5	1	0.707973	0.70798	0.29202	1	0.50819	0.508204	0.491796	1	0.639442	0.63948	0.36052	0	0.61758	0.617588	-0.617588
5.5065	5506.5	0	0.703911	0.703915	-0.703915	0	0.507206	0.507214	-0.507214	0	0.639893	0.639913	-0.639913	0	0.617967	0.617971	-0.617971
5.5165	5516.5	0	0.699911	0.699913	-0.699913	0	0.506209	0.506212	-0.506212	1	0.640313	0.640323	0.359677	0	0.61838	0.618383	-0.618383
5.5265	5526.5	1	0.695971	0.695972	0.304028	2	0.505196	0.505198	1.4948	1	0.6407	0.640705	0.359295	0	0.618821	0.618822	-0.618822
5.5365	5536.5	1	0.692095	0.692095	0.307905	0	0.50417	0.50417	-0.50417	0	0.641056	0.641056	-0.641056	1	0.619289	0.619289	0.380711
5.5465	5546.5	0	0.688278	0.688278	-0.688278	0	0.503129	0.503129	-0.503129	1	0.64138	0.64138	0.35862	0	0.619783	0.619783	-0.619783
5.5565	5556.5	0	0.684524	0.684524	-0.684524	0	0.502073	0.502073	-0.502073	1	0.641672	0.641672	0.358328	2	0.620304	0.620304	1.3797
5.5665	5566.5	1	0.68083	0.68083	0.31917	0	0.501004	0.501004	-0.501004	1	0.641933	0.641933	0.358067	0	0.620853	0.620853	-0.620853
5.5765	5576.5	1	0.6772	0.6772	0.3228	1	0.499919	0.499919	0.500081	0	0.642163	0.642163	-0.642163	0	0.621427	0.621427	-0.621427
5.5865	5586.5	0	0.673632	0.673632	-0.673632	0	0.49882	0.49882	-0.49882	1	0.642361	0.642361	0.357639	0	0.622029	0.622029	-0.622029
5.5965	5596.5	2	0.670122	0.670122	1.32988	0	0.497707	0.497707	-0.497707	0	0.642527	0.642527	-0.642527	1	0.622657	0.622657	0.377343
5.6065	5606.5	0	0.666677	0.666677	-0.666677	0	0.49658	0.49658	-0.49658	0	0.64266	0.64266	-0.64266	1	0.623313	0.623313	0.376688
5.6165	5616.5	1	0.663291	0.663291	0.336709	2	0.495438	0.495438	1.50456	1	0.642763	0.642763	0.357237	0	0.623994	0.623994	-0.623994
5.6265	5626.5	0	0.659967	0.659967	-0.659967	0	0.494281	0.494281	-0.494281	1	0.642834	0.642834	0.357166	1	0.624703	0.624703	0.375297
5.6365	5636.5	3	0.656707	0.656707	2.34329	1	0.49311	0.49311	0.50689	1	0.642873	0.642873	0.357127	0	0.625439	0.625439	-0.625439
5.6465	5646.5	1	0.653505	0.653505	0.346495	0	0.491925	0.491925	-0.491925	0	0.64288	0.64288	-0.64288	0	0.626202	0.626202	-0.626202
5.6565	5656.5	2	0.650368	0.650368	1.34963	0	0.490725	0.490725	-0.490725	0	0.642856	0.642856	-0.642856	0	0.626991	0.626991	-0.626991
5.6665	5666.5	1	0.647289	0.647289	0.352711	2	0.489511	0.489511	1.51049	2	0.6428	0.6428	1.3572	1	0.627808	0.627808	0.372192
5.6765	5676.5	0	0.644275	0.644275	-0.644275	1	0.488283	0.488283	0.511717	1	0.642713	0.642713	0.357287	0	0.628651	0.628651	-0.628651
5.6865	5686.5	0	0.641319	0.641319	-0.641319	0	0.48704	0.48704	-0.48704	0	0.642594	0.642594	-0.642594	0	0.62952	0.62952	-0.62952
5.6965	5696.5	0	0.638428	0.638428	-0.638428	0	0.485782	0.485782	-0.485782	1	0.642443	0.642443	0.357557	1	0.630417	0.630417	0.369583
5.7065	5706.5	0	0.635597	0.635597	-0.635597	1	0.48451	0.48451	0.51549	0	0.64226	0.64226	-0.64226	0	0.63134	0.63134	-0.63134
5.7165	5716.5	1	0.632827	0.632827	0.367173	0	0.483224	0.483224	-0.483224	1	0.642046	0.642046	0.357954	1	0.632291	0.632291	0.367709
5.7265	5726.5	2	0.63012	0.63012	1.36988	1	0.481924	0.481924	0.518076	2	0.6418	0.6418	1.3582	0	0.633268	0.633268	-0.633268
5.7365	5736.5	0	0.627472	0.627472	-0.627472	0	0.480608	0.480608	-0.480608	0	0.641523	0.641523	-0.641523	2	0.634272	0.634272	1.36573
5.7465	5746.5	0	0.624889	0.624889	-0.624889	0	0.479279	0.479279	-0.479279	0	0.641213	0.641213	-0.641213	1	0.635304	0.635304	0.364696
5.7565	5756.5	1	0.622364	0.622364	0.377636	1	0.477935	0.477935	0.522065	0	0.640872	0.640872	-0.640872	2	0.636361	0.636361	1.36364
5.7665	5766.5	0	0.619904	0.619904	-0.619904	0	0.476576	0.476576	-0.476576	2	0.6405	0.6405	1.3595	0	0.637445	0.637445	-0.637445
5.7765	5776.5	1	0.617504	0.617504	0.382496	0	0.475204	0.475204	-0.475204	0	0.640096	0.640096	-0.640096	1	0.638556	0.638556	0.361443
5.7865	5786.5	1	0.615165	0.615165	0.384835	0	0.473816	0.473816	-0.473816	0	0.63966	0.63966	-0.63966	1	0.639695	0.639695	0.360305
5.7965	5796.5	1	0.612888	0.612888	0.387112	1	0.472415	0.472415	0.527585	1	0.639192	0.639192	0.360808	2	0.64086	0.64086	1.35914
5.8065	5806.5	1	0.610672	0.610672	0.389328	0	0.470998	0.470998	-0.470998	0	0.638692	0.638692	-0.638692	1	0.642052	0.642052	0.357948
5.8165	5816.5	0	0.60852	0.60852	-0.60852	1	0.469568	0.469568	0.530432	0	0.638162	0.638162	-0.638162	0	0.64327	0.64327	-0.64327
5.8265	5826.5	0	0.606425	0.606425	-0.606425	1	0.468123	0.468123	0.531877	1	0.6376	0.6376	0.3624	0	0.644516	0.644516	-0.644516
5.8365	5836.5	1	0.604396	0.604396	0.395604	0	0.466663	0.466663	-0.466663	0	0.637005	0.637005	-0.637005	0	0.645788	0.645788	-0.645788
5.8465	5846.5	0	0.602426	0.602426	-0.602426	0	0.46519	0.46519	-0.46519	0	0.636379	0.636379	-0.636379	1	0.647087	0.647087	0.352913
5.8565	5856.5	0	0.600518	0.600518	-0.600518	0	0.463701	0.463701	-0.463701	0	0.635721	0.635721	-0.635721	1	0.648413	0.648413	0.351587
5.8665	5866.5	1	0.598673	0.598673	0.401327	0	0.462199	0.462199	-0.462199	1	0.635032	0.635032	0.364968	0	0.649765	0.649765	-0.649765
5.8765	5876.5	0	0.596887	0.596887	-0.596887	0	0.460682	0.460682	-0.460682	0	0.634312	0.634312	-0.634312	0	0.651145	0.651145	-0.651145
5.8865	5886.5	2	0.595164	0.595164	1.40484	0	0.45915	0.45915	-0.45915	1	0.633558	0.633558	0.366442	1	0.652551	0.652551	0.347449
5.8965	5896.5	1	0.593505	0.593505	0.406495	1	0.457604	0.457604	0.542396	1	0.632774	0.632774	0.367226	1	0.653984	0.653984	0.346015
5.9065	5906.5	0	0.591904	0.591904	-0.591904	1	0.456044	0.456044	0.543956	0	0.631958	0.631958	-0.631958	0	0.655445	0.655445	-0.655445
5.9165	5916.5	1	0.590366	0.590366	0.409634	1	0.454469	0.454469	0.545531	1	0.631111	0.631111	0.368889	0	0.656931	0.656931	-0.656931
5.9265	5926.5	0	0.588888	0.588888	-0.588888	0	0.45288	0.45288	-0.45288	0	0.630232	0.630232	-0.630232	0	0.658445	0.658445	-0.658445
5.9365	5936.5	2	0.587474	0.587474	1.41253	1	0.451276	0.451276	0.548724	0	0.62932	0.62932	-0.62932	1	0.659986	0.659986	0.340014
5.9465	5946.5	1	0.58612	0.58612	0.41388	1	0.449658	0.449658	0.550342	1	0.628377	0.628377	0.371623	1	0.661553	0.661553	0.338447
5.9565	5956.5	0	0.584828	0.584828	-0.584828	0	0.448026	0.448026	-0.448026	1	0.627403	0.627403	0.372597	0	0.663147	0.663147	-0.663147
5.9665	5966.5	2	0.583597	0.583597	1.4164	0	0.446379	0.446379	-0.446379	0	0.626398	0.626398	-0.626398	1	0.664768	0.664768	0.335232
5.9765	5976.5	0	0.582427	0.582427	-0.582427	0	0.444717	0.444717	-0.444717	1	0.62536	0.62536	0.37464	0	0.666416	0.666416	-0.666416
5.9865	5986.5	2	0.581321	0.581321	1.41868	1	0.443041	0.443041	0.556959	0	0.62429	0.62429	-0.62429	1	0.668091	0.668091	0.331909
5.9965	5996.5	0	0.580274	0.580274	-0.580274	0	0.441351	0.441351	-0.441351	0	0.623189	0.623189	-0.623189	1	0.669792	0.669792	0.330208
6.0065	6006.5	1	0.57929	0.57929	0.42071	0	0.439647	0.439647	-0.439647	2	0.622057	0.622057	1.37794	1	0.67152	0.67152	0.32848
6.0165	6016.5	0	0.578367	0.578367	-0.578367	0	0.437927	0.437927	-0.437927	2	0.620892	0.620892	1.37911	3	0.673276	0.673276	2.32672
6.0265	6026.5	1	0.577507	0.577507	0.422493	0	0.436194	0.436194	-0.436194	0	0.619696	0.619696	-0.619696	1	0.675058	0.675058	0.324942
6.0365	6036.5	1	0.576707	0.576707	0.423293	0	0.434446	0.434446	-0.434446	1	0.618468	0.618468	0.381532	0	0.676866	0.676866	-0.676866
6.0465	6046.5	0	0.575968	0.575968	-0.575968	1	0.432684	0.432684	0.567316	0	0.617209	0.617209	-0.617209	2	0.678702	0.678702	1.3213
6.0565	6056.5	0	0.575293	0.575293	-0.575293	0	0.430907	0.430907	-0.430907	0	0.615918	0.615918	-0.615918	1	0.680564	0.680564	0.319436
6.0665	6066.5	0	0.574677	0.574677	-0.574677	0	0.429115	0.429115	-0.429115	1	0.614595	0.614595	0.385405	0	0.682454	0.682454	-0.682454
6.0765	6076.5	0	0.574123	0.574159	-0.574159	0	0.42731	0.427334	-0.427334	1	0.613241	0.61327	0.38673	0	0.68437	0.684401	-0.684401
6.0865	6086.5	1	0.573632	0.573702	0.426298	2	0.42549	0.425536	1.57446	1	0.611855	0.611911	0.388089	0	0.686313	0.686375	-0.686375
6.0965	6096.5	1	0.573201	0.573335	0.426665	0	0.423656	0.423744	-0.423744	0	0.610437	0.610545	-0.610545	2	0.688282	0.688401	1.3116
6.1065	6106.5	0	0.572834	0.57308	-0.57308	1	0.421807	0.421969	0.578031	1	0.608987	0.609186	0.390814	0	0.690279	0.690499	-0.690499
6.1165	6116.5	0	0.572525	0.572966	-0.572966	2	0.419943	0.420234	1.57977	0	0.607506	0.607862	-0.607862	0	0.692302	0.692696	-0.692696
6.1265	6126.5	1	0.57228	0.573045	0.426955	0	0.418065	0.418571	-0.418571	1	0.605993	0.60661	0.39339	0	0.694352	0.695036	-0.695036
6.1365	6136.5	0	0.572094	0.573381	-0.573381	1	0.416173	0.417023	0.582977	2	0.604449	0.605486	1.39451	1	0.696429	0.69758	0.30242
6.1465	6146.5	0	0.571973	0.574072	-0.574072	0	0.414267	0.415654	-0.415654	0	0.602873	0.604565	-0.604565	0	0.698533	0.700409	-0.700409
6.1565	6156.5	0	0.571083	0.574918	-0.574918	0	0.412721	0.415883	-0.415883	0	0.605186	0.610379	-0.610379	0	0.698166	0.701659	-0.701659
6.1665	6166.5	0	0.570193	0.576316	-0.576316	1	0.411176	0.416479	0.583521	0	0.6075	0.616643	-0.616643	0	0.6978	0.703403	-0.703403
6.1765	6176.5	0	0.569304	0.580505	-0.580505	1	0.40963	0.421462	0.578538	0	0.609813	0.633668	-0.633668	1	0.697433	0.707905	0.292095
6.1865	6186.5	0	0.568414	0.586297	-0.586297	0	0.408085	0.428403	-0.428403	0	0.612127	0.654992	-0.654992	0	0.697067	0.713933	-0.713933
6.1965	6196.5	0	0.567524	0.595759	-0.595759	0	0.406539	0.441028	-0.441028	1	0.61444	0.690182	0.309818	0	0.696701	0.723579	-0.723579
6.2065	6206.5	0	0.566635	0.610766	-0.610766	2	0.404993	0.462766	1.53723	1	0.616754	0.748077	0.251923	0	0.696334	0.738746	-0.738746
6.2165	6216.5	1	0.565745	0.634047	0.365953	1	0.403448	0.498756	0.501244	1	0.619067	0.842044	0.157956	0	0.695968	0.762217	-0.762217
6.2265	6226.5	1	0.564855	0.669466	0.330534	1	0.401902	0.556418	0.443582	1	0.621381	0.991483	0.00851739	0	0.695601	0.797952	-0.797952
6.2365	6236.5	1	0.563965	0.72231	0.27769	1	0.400357	0.646013	0.353987	1	0.623694	1.22331	-0.223305	3	0.695235	0.851376	2.14862
6.2465	6246.5	1	0.563076	0.799507	0.200493	0	0.398811	0.78106	-0.78106	2	0.626008	1.57302	0.426979	1	0.694869	0.929607	0.070393
6.2565	6256.5	1	0.562186	0.909679	0.0903205	0	0.397265	0.978411	-0.978411	0	0.628321	2.08491	-2.08491	2	0.694502	1.04151	0.958492
6.2665	6266.5	0	0.561296	1.0629	-1.0629	1	0.39572	1.25773	-0.257734	2	0.630635	2.81065	-0.810651	1	0.694136	1.19743	-0.197427
6.2765	6276.5	0	0.560407	1.27002	-1.27002	2	0.394174	1.64018	0.359822	2	0.632948	3.80577	-1.80577	1	0.69377	1.40851	-0.408511
6.2865	6286.5	1	0.559517	1.54147	-0.541473	0	0.392629	2.14604	-2.14604	5	0.635262	5.12353	-0.123527	2	0.693403	1.68548	0.31452
6.2965	6296.5	0	0.558627	1.88559	-1.88559	1	0.391083	2.79147	-1.79147	3	0.637575	6.80627	-3.80627	1	0.693037	2.03688	-1.03688
6.3065	6306.5	3	0.557737	2.30647	0.693528	9	0.389538	3.58443	5.41557	5	0.639889	8.87486	-3.87486	2	0.69267	2.46691	-0.466905
6.3165	6316.5	2	0.556848	2.80177	-0.801765	4	0.387992	4.52045	-0.52045	7	0.642202	11.3177	-4.3177	3	0.692304	2.97317	0.0268312
6.3265	6326.5	4	0.555958	3.36076	0.639235	6	0.386446	5.57909	0.420915	13	0.644516	14.0814	-1.08137	5	0.691938	3.54471	1.45529
6.3365	6336.5	2	0.555068	3.9633	-1.9633	6	0.384901	6.72183	-0.721834	13	0.646829	17.0654	-4.06536	3	0.691571	4.16089	-1.16089
6.3465	6346.5	5	0.554179	4.5799	0.420102	6	0.383355	7.89255	-1.89255	18	0.649143	20.1232	-2.12319	3	0.691205	4.79159	-1.79159
6.3565	6356.5	4	0.553289	5.17355	-1.17355	9	0.38181	9.02082	-0.0208159	28	0.651456	23.0712	4.92881	3	0.690838	5.39894	-2.39894
6.3665	6366.5	3	0.552399	5.70304	-2.70304	5	0.380264	10.0283	-5.02832	25	0.65377	25.7052	-0.705223	5	0.690472	5.94083	-0.940833
6.3765	6376.5	10	0.551509	6.12751	3.87249	13	0.378719	10.8376	2.16244	34	0.656083	27.8233	6.17674	8	0.690106	6.3755	1.6245
6.3865	6386.5	4	0.55062	6.41161	-2.41161	8	0.377173	11.3815	-3.38153	19	0.658397	29.2508	-10.2508	6	0.689739	6.66685	-0.666854
6.3965	6396.5	9	0.54973	6.53035	2.46965	12	0.375627	11.6129	0.387075	28	0.66071	29.8646	-1.8646	8	0.689373	6.78935	1.21065
6.4065	6406.5	4	0.54884	6.47267	-2.47267	7	0.374082	11.5108	-4.5108	27	0.663024	29.6101	-2.61011	7	0.689006	6.7317	0.268302
6.4165	6416.5	10	0.54795	6.24312	3.75688	15	0.372536	11.0837	3.91627	30	0.665337	28.5096	1.49036	10	0.68864	6.49853	3.50147
6.4265	6426.5	6	0.547061	5.86117	0.138826	7	0.370991	10.3685	-3.36853	29	0.667651	26.659	2.34098	6	0.688274	6.10975	-0.109745
6.4365	6436.5	2	0.546171	5.3585	-3.3585	13	0.369445	9.42499	3.57501	28	0.669964	24.2139	3.78613	6	0.687907	5.59767	0.402332
6.4465	6446.5	5	0.545281	4.77455	0.225454	11	0.367899	8.32758	2.67242	25	0.672278	21.368	3.63202	4	0.687541	5.00257	-1.00257
6.4565	6456.5	6	0.544392	4.1514	1.8486	12	0.366354	7.15574	4.84426	19	0.674591	18.3281	0.671938	4	0.687175	4.36741	-0.367408
6.4665	6466.5	2	0.543502	3.52883	-1.52883	6	0.364808	5.98452	0.0154772	20	0.676905	15.2894	4.71058	2	0.686808	3.73279	-1.73279
6.4765	6476.5	3	0.542612	2.94029	0.0597069	4	0.363263	4.87707	-0.877067	13	0.679218	12.4163	0.583656	3	0.686442	3.13287	-0.132872
6.4865	6486.5	2	0.541722	2.41042	-0.410423	5	0.361717	3.87985	1.12015	11	0.681532	9.82977	1.17023	3	0.686075	2.59279	0.407212
6.4965	6496.5	4	0.540833	1.95412	2.04588	6	0.360172	3.02101	2.97899	12	0.683845	7.60293	4.39707	2	0.685709	2.12776	-0.127757
6.5065	6506.5	1	0.539943	1.57714	-0.577139	3	0.358626	2.31144	0.688562	11	0.686159	5.76417	5.23583	0	0.685343	1.74365	-1.74365
6.5165	6516.5	2	0.539053	1.27768	0.72232	5	0.35708	1.74778	3.25222	9	0.688472	4.3048	4.6952	2	0.684976	1.43864	0.561361
6.5265	6526.5	3	0.538164	1.04854	1.95146	0	0.355535	1.31654	-1.31654	2	0.690786	3.18978	-1.18978	2	0.68461	1.20538	0.794616
6.5365	6536.5	1	0.537274	0.879506	0.120494	1	0.353989	0.998385	0.00161541	2	0.693099	2.36879	-0.368792	0	0.684243	1.03345	-1.03345
6.5465	6546.5	1	0.536384	0.759059	0.240941	1	0.352444	0.771722	0.228278	1	0.695413	1.78571	-0.785708	1	0.683877	0.911087	0.0889127
6.5565	6556.5	0	0.535494	0.67608	-0.67608	1	0.350898	0.615609	0.384391	1	0.697726	1.38608	-0.386082	1	0.683511	0.826959	0.173041
6.5665	6566.5	2	0.534605	0.620729	1.37927	0	0.349353	0.511517	-0.511517	0	0.70004	1.12173	-1.12173	0	0.683144	0.771023	-0.771023
6.5765	6576.5	0	0.533715	0.58491	-0.58491	0	0.347807	0.444202	-0.444202	0	0.702353	0.953021	-0.953021	0	0.682778	0.735015	-0.735015
6.5865	6586.5	0	0.532825	0.562353	-0.562353	0	0.346261	0.40186	-0.40186	0	0.704667	0.849247	-0.849247	0	0.682411	0.712541	-0.712541
6.5965	6596.5	1	0.531936	0.548461	0.451539	0	0.344716	0.375832	-0.375832	1	0.70698	0.787895	0.212105	2	0.682045	0.698907	1.30109
6.6065	6606.5	1	0.531046	0.54002	0.45998	0	0.34317	0.360067	-0.360067	1	0.709294	0.753233	0.246767	0	0.681679	0.690835	-0.690835
6.6165	6616.5	2	0.530156	0.534102	1.4659	1	0.341625	0.349054	0.650946	1	0.711607	0.730926	0.269074	0	0.681312	0.685338	-0.685338
6.6265	6626.5	1	0.529266	0.531298	0.468702	0	0.340079	0.343904	-0.343904	0	0.713921	0.723866	-0.723866	1	0.680946	0.683018	0.316982
6.6365	6636.5	0	0.528377	0.528377	-0.528377	1	0.338533	0.338533	0.661466	2	0.716234	0.716234	1.28377	0	0.68058	0.68058	-0.68058
6.6465	6646.5	0	0.527487	0.527487	-0.527487	1	0.336988	0.336988	0.663012	1	0.718548	0.718548	0.281452	2	0.680213	0.680213	1.31979
6.6565	6656.5	0	0.526597	0.526597	-0.526597	0	0.335442	0.335442	-0.335442	1	0.720861	0.720861	0.279139	1	0.679847	0.679847	0.320153
6.6665	6666.5	0	0.525707	0.525707	-0.525707	1	0.333897	0.333897	0.666103	0	0.723175	0.723175	-0.723175	3	0.67948	0.67948	2.32052
6.6765	6676.5	0	0.524818	0.524818	-0.524818	1	0.332351	0.332351	0.667649	2	0.725488	0.725488	1.27451	0	0.679114	0.679114	-0.679114
6.6865	6686.5	0	0.523928	0.523928	-0.523928	0	0.330806	0.330806	-0.330806	0	0.727802	0.727802	-0.727802	0	0.678747	0.678747	-0.678747
6.6965	6696.5	0	0.523038	0.523038	-0.523038	0	0.32926	0.32926	-0.32926	2	0.730115	0.730115	1.26988	1	0.678381	0.678381	0.321619
6.7065	6706.5	0	0.522149	0.522149	-0.522149	0	0.327714	0.327714	-0.327714	0	0.732429	0.732429	-0.732429	2	0.678015	0.678015	1.32198
6.7165	6716.5	2	0.521259	0.521259	1.47874	0	0.326169	0.326169	-0.326169	1	0.734742	0.734742	0.265258	0	0.677648	0.677648	-0.677648
6.7265	6726.5	1	0.520369	0.520369	0.479631	0	0.324623	0.324623	-0.324623	3	0.737055	0.737055	2.26294	0	0.677282	0.677282	-0.677282
6.7365	6736.5	2	0.519479	0.519479	1.48052	1	0.323078	0.323078	0.676922	3	0.739369	0.739369	2.26063	0	0.676916	0.676916	-0.676916
6.7465	6746.5	0	0.51859	0.51859	-0.51859	0	0.321532	0.321532	-0.321532	1	0.741683	0.741683	0.258317	1	0.676549	0.676549	0.323451
6.7565	6756.5	0	0.5177	0.5177	-0.5177	1	0.319987	0.319987	0.680013	1	0.743996	0.743996	0.256004	1	0.676183	0.676183	0.323817
6.7665	6766.5	0	0.51681	0.51681	-0.51681	0	0.318441	0.318441	-0.318441	1	0.746309	0.746309	0.25369	1	0.675816	0.675816	0.324184
6.7765	6776.5	3	0.515921	0.515921	2.48408	0	0.316895	0.316895	-0.316895	0	0.748623	0.748623	-0.748623	1	0.67545	0.67545	0.32455
6.7865	6786.5	0	0.515031	0.515031	-0.515031	0	0.31535	0.31535	-0.31535	0	0.750937	0.750937	-0.750937	1	0.675084	0.675084	0.324916
6.7965	6796.5	1	0.514141	0.514141	0.485859	0	0.313804	0.313804	-0.313804	0	0.75325	0.75325	-0.75325	0	0.674717	0.674717	-0.674717
6.8065	6806.5	0	0.513251	0.513251	-0.513251	1	0.312259	0.312259	0.687741	0	0.755564	0.755564	-0.755564	0	0.674351	0.674351	-0.674351
6.8165	6816.5	0	0.512362	0.512554	-0.512554	1	0.310713	0.311075	0.688925	0	0.757877	0.758819	-0.758819	1	0.673984	0.674181	0.325819
6.8265	6826.5	0	0.511472	0.511848	-0.511848	0	0.309167	0.309875	-0.309875	0	0.76019	0.762029	-0.762029	0	0.673618	0.674001	-0.674001
6.8365	6836.5	2	0.510582	0.511295	1.4887	1	0.307622	0.308964	0.691036	2	0.762504	0.765995	1.23401	0	0.673252	0.673979	-0.673979
6.8465	6846.5	0	0.509692	0.511009	-0.511009	0	0.306076	0.308554	-0.308554	0	0.764818	0.771261	-0.771261	0	0.672885	0.674228	-0.674228
6.8565	6856.5	0	0.508803	0.511165	-0.511165	1	0.304531	0.308978	0.691022	0	0.767131	0.778695	-0.778695	1	0.672519	0.674929	0.325071
6.8665	6866.5	0	0.507913	0.512035	-0.512035	2	0.302985	0.310746	1.68925	0	0.769444	0.789625	-0.789625	0	0.672153	0.676358	-0.676358
6.8765	6876.5	1	0.507023	0.514017	0.485983	0	0.30144	0.314607	-0.314607	3	0.771758	0.805999	2.194	1	0.671786	0.678922	0.321078
6.8865	6886.5	1	0.506134	0.517671	0.482329	0	0.299894	0.321618	-0.321618	1	0.774072	0.830562	0.169437	1	0.67142	0.683192	0.316808
6.8965	6896.5	5	0.505244	0.523752	4.47625	0	0.298349	0.333197	-0.333197	2	0.776385	0.867005	1.13299	1	0.671053	0.689938	0.310062
6.9065	6906.5	2	0.504354	0.533222	1.46678	0	0.296803	0.351158	-0.351158	2	0.778698	0.920043	1.07996	1	0.670687	0.700142	0.299858
6.9165	6916.5	0	0.503464	0.547244	-0.547244	1	0.295257	0.377691	0.622309	2	0.781012	0.995373	1.00463	0	0.670321	0.714992	-0.714992
6.9265	6926.5	1	0.502575	0.567136	0.432864	2	0.293712	0.415272	1.58473	1	0.783325	1.09943	-0.0994281	1	0.669954	0.73583	0.26417
6.9365	6936.5	2	0.501685	0.594255	1.40575	0	0.292166	0.46646	-0.46646	0	0.785639	1.23887	-1.23887	1	0.669588	0.764042	0.235958
6.9465	6946.5	0	0.500795	0.629852	-0.629852	0	0.290621	0.533611	-0.533611	2	0.787952	1.41982	0.580183	0	0.669221	0.800905	-0.800905
6.9565	6956.5	0	0.499906	0.674853	-0.674853	0	0.289075	0.618463	-0.618463	1	0.790266	1.64679	-0.646792	2	0.668855	0.847363	1.15264
6.9665	6966.5	1	0.499016	0.72961	0.27039	1	0.287529	0.721679	0.278321	2	0.792579	1.92152	0.0784832	0	0.668489	0.903775	-0.903775
6.9765	6976.5	0	0.498126	0.79366	-0.79366	2	0.285984	0.842381	1.15762	3	0.794893	2.2417	0.758297	2	0.668122	0.969669	1.03033
6.9865	6986.5	1	0.497237	0.865523	0.134477	3	0.284438	0.977776	2.02222	3	0.797206	2.60008	0.399916	0	0.667756	1.04353	-1.04353
6.9965	6996.5	1	0.496347	0.942604	0.0573963	2	0.282893	1.12297	0.877028	3	0.79952	2.98393	0.0160689	1	0.667389	1.12272	-0.122716
7.0065	7006.5	1	0.495457	1.02124	-0.0212426	4	0.281347	1.27106	2.72893	3	0.801833	3.37529	-0.375287	1	0.667023	1.20349	-0.203487
7.0165	7016.5	1	0.494567	1.09693	-0.0969344	1	0.279801	1.41356	-0.41356	2	0.804147	3.75205	-1.75205	1	0.666657	1.28125	-0.281246
7.0265	7026.5	1	0.493678	1.16472	-0.164718	1	0.278256	1.5411	-0.541099	3	0.80646	4.08987	-1.08987	1	0.66629	1.35093	-0.350928
7.0365	7036.5	4	0.492788	1.21969	2.78031	1	0.27671	1.64444	-0.644442	5	0.808774	4.36471	0.635286	0	0.665924	1.40753	-1.40753
7.0465	7046.5	3	0.491899	1.2576	1.7424	4	0.275165	1.71555	2.28445	5	0.811087	4.55566	0.444341	0	0.665558	1.44671	-1.44671
7.0565	7056.5	1	0.491009	1.27536	-0.275358	3	0.273619	1.7486	1.2514	5	0.813401	4.64757	0.352434	0	0.665191	1.46532	-1.46532
7.0665	7066.5	2	0.490119	1.27147	0.728533	2	0.272074	1.74078	0.259222	4	0.815714	4.63308	-0.633078	2	0.664825	1.46183	0.538173
7.0765	7076.5	2	0.489229	1.24622	0.753781	1	0.270528	1.69262	-0.692621	2	0.818028	4.51362	-2.51362	4	0.664458	1.43653	2.56347
7.0865	7086.5	2	0.48834	1.20165	0.798346	2	0.268983	1.60798	0.392018	1	0.820341	4.29922	-3.29922	0	0.664092	1.39151	-1.39151
7.0965	7096.5	1	0.48745	1.14128	-0.141276	1	0.267437	1.49348	-0.493485	2	0.822655	4.00711	-2.00711	0	0.663726	1.33035	-1.33035
7.1065	7106.5	0	0.48656	1.0696	-1.0696	1	0.265891	1.35766	-0.357662	5	0.824968	3.65951	1.34049	2	0.663359	1.25764	0.742355
7.1165	7116.5	2	0.485671	0.991565	1.00843	1	0.264346	1.20989	-0.209888	2	0.827282	3.28084	-1.28084	1	0.662993	1.17847	-0.178466
7.1265	7126.5	0	0.484781	0.912016	-0.912016	2	0.2628	1.05932	0.940682	1	0.829595	2.89495	-1.89495	1	0.662626	1.09774	-0.0977429
7.1365	7136.5	1	0.483891	0.835176	0.164824	2	0.261255	0.913976	1.08602	1	0.831909	2.52274	-1.52274	0	0.66226	1.0198	-1.0198
7.1465	7146.5	1	0.483002	0.76434	0.23566	1	0.259709	0.780121	0.219879	0	0.834222	2.18054	-2.18054	1	0.661894	0.947998	0.0520021
7.1565	7156.5	2	0.482112	0.70171	1.29829	0	0.258163	0.661948	-0.661948	3	0.836536	1.8793	1.1207	0	0.661527	0.884594	-0.884594
7.1665	7166.5	1	0.481222	0.648402	0.351598	3	0.256618	0.561589	2.43841	0	0.838849	1.62457	-1.62457	0	0.661161	0.830731	-0.830731
7.1765	7176.5	2	0.480332	0.60459	1.39541	1	0.255072	0.479379	0.520621	0	0.841163	1.41724	-1.41724	2	0.660794	0.786583	1.21342
7.1865	7186.5	0	0.479443	0.56972	-0.56972	0	0.253527	0.414266	-0.414266	2	0.843476	1.25456	0.745441	1	0.660428	0.751588	0.248412
7.1965	7196.5	2	0.478553	0.542767	1.45723	1	0.251981	0.364282	0.635718	1	0.84579	1.13139	-0.13139	2	0.660062	0.724693	1.27531
7.2065	7206.5	1	0.477664	0.522465	0.477535	0	0.250435	0.326996	-0.326996	1	0.848103	1.04137	-0.0413715	0	0.659695	0.704603	-0.704603
7.2165	7216.5	1	0.476774	0.507501	0.492499	0	0.24889	0.299879	-0.299879	1	0.850417	0.97788	0.0221196	2	0.659329	0.689971	1.31003
7.2265	7226.5	2	0.475884	0.496652	1.50335	0	0.247344	0.280564	-0.280564	1	0.85273	0.934721	0.0652786	1	0.658963	0.679544	0.320456
7.2365	7236.5	0	0.474994	0.488862	-0.488862	0	0.245799	0.267008	-0.267008	0	0.855044	0.906534	-0.906534	1	0.658596	0.672239	0.327761
7.2465	7246.5	1	0.474105	0.483277	0.516723	1	0.244253	0.25755	0.74245	1	0.857357	0.888967	0.111033	1	0.65823	0.667178	0.332822
7.2565	7256.5	0	0.473215	0.479237	-0.479237	0	0.242708	0.250913	-0.250913	2	0.859671	0.878669	1.12133	0	0.657863	0.663684	-0.663684
7.2665	7266.5	0	0.472325	0.476256	-0.476256	1	0.241162	0.24616	0.75384	0	0.861984	0.873185	-0.873185	1	0.657497	0.661259	0.338741
7.2765	7276.5	0	0.471436	0.473988	-0.473988	0	0.239616	0.242628	-0.242628	0	0.864298	0.870791	-0.870791	1	0.65713	0.659549	0.340451
7.2865	7286.5	0	0.470546	0.472195	-0.472195	1	0.238071	0.239872	0.760128	0	0.866611	0.870322	-0.870322	1	0.656764	0.658311	0.341689
7.2965	7296.5	0	0.469656	0.470413	-0.470413	0	0.236525	0.237025	-0.237025	0	0.868925	0.869534	-0.869534	2	0.656398	0.657072	1.34293
7.3065	7306.5	0	0.468767	0.469291	-0.469291	1	0.23498	0.235326	0.764674	0	0.871238	0.87166	-0.87166	2	0.656031	0.656497	1.3435
7.3165	7316.5	1	0.467877	0.468236	0.531764	1	0.233434	0.23367	0.76633	1	0.873552	0.87384	0.12616	0	0.655665	0.65598	-0.65598
7.3265	7326.5	0	0.466987	0.467235	-0.467235	0	0.231888	0.23205	-0.23205	1	0.875865	0.876063	0.123937	0	0.655299	0.655511	-0.655511
7.3365	7336.5	0	0.466097	0.466277	-0.466277	0	0.230343	0.230459	-0.230459	3	0.878179	0.878321	2.12168	0	0.654932	0.655078	-0.655078
7.3465	7346.5	0	0.465208	0.465353	-0.465353	0	0.228797	0.228889	-0.228889	0	0.880492	0.880605	-0.880605	0	0.654566	0.654673	-0.654673
7.3565	7356.5	2	0.464318	0.464458	1.53554	0	0.227252	0.227338	-0.227338	0	0.882806	0.882912	-0.882912	0	0.654199	0.65429	-0.65429
7.3665	7366.5	0	0.463428	0.463587	-0.463587	1	0.225706	0.225801	0.774199	0	0.885119	0.885237	-0.885237	0	0.653833	0.653925	-0.653925
7.3765	7376.5	1	0.462539	0.462737	0.537263	0	0.22416	0.224279	-0.224279	0	0.887433	0.887579	-0.887579	0	0.653467	0.653573	-0.653573
7.3865	7386.5	2	0.461649	0.461908	1.53809	0	0.222615	0.222768	-0.222768	2	0.889746	0.889936	1.11006	1	0.6531	0.653235	0.346765
7.3965	7396.5	1	0.460759	0.4611	0.5389	3	0.221069	0.22127	2.77873	0	0.89206	0.892309	-0.892309	3	0.652734	0.652907	2.34709
7.4065	7406.5	0	0.45987	0.460308	-0.460308	1	0.219524	0.219782	0.780218	1	0.894373	0.894694	0.105306	0	0.652367	0.652588	-0.652588
7.4165	7416.5	0	0.45898	0.459538	-0.459538	0	0.217978	0.218307	-0.218307	1	0.896687	0.897094	0.102906	1	0.652001	0.652282	0.347718
7.4265	7426.5	1	0.45809	0.458781	0.541219	2	0.216432	0.21684	1.78316	1	0.899	0.899505	0.100495	0	0.651635	0.651983	-0.651983
7.4365	7436.5	2	0.457201	0.458034	1.54197	3	0.214887	0.215378	2.78462	1	0.901314	0.901923	0.0980772	0	0.651268	0.651689	-0.651689
7.4465	7446.5	1	0.456311	0.45729	0.54271	0	0.213341	0.213918	-0.213918	0	0.903627	0.904343	-0.904343	2	0.650902	0.651395	1.34861
7.4565	7456.5	1	0.455421	0.456541	0.543459	0	0.211796	0.212456	-0.212456	1	0.905941	0.906759	0.0932412	2	0.650536	0.6511	1.3489
7.4665	7466.5	2	0.454532	0.455778	1.54422	2	0.21025	0.210985	1.78902	0	0.908254	0.909165	-0.909165	0	0.650169	0.650798	-0.650798
7.4765	7476.5	3	0.453642	0.454993	2.54501	0	0.208704	0.209501	-0.209501	3	0.910568	0.911555	2.08845	1	0.649803	0.650484	0.349516
7.4865	7486.5	0	0.452752	0.454179	-0.454179	1	0.207159	0.208	0.792	2	0.912881	0.913924	1.08608	0	0.649436	0.650156	-0.650156
7.4965	7496.5	0	0.451863	0.453329	-0.453329	0	0.205613	0.206478	-0.206478	0	0.915195	0.916266	-0.916266	3	0.64907	0.649809	2.35019
7.5065	7506.5	0	0.450973	0.45244	-0.45244	0	0.204068	0.204933	-0.204933	1	0.917508	0.918581	0.0814193	1	0.648704	0.649443	0.350556
7.5165	7516.5	2	0.450083	0.451513	1.54849	1	0.202522	0.203365	0.796635	2	0.919822	0.920867	1.07913	0	0.648337	0.649058	-0.649058
7.5265	7526.5	1	0.449193	0.45055	0.54945	2	0.200977	0.201776	1.79822	1	0.922135	0.923127	0.0768732	0	0.647971	0.648655	-0.648655
7.5365	7536.5	0	0.448304	0.449557	-0.449557	0	0.199431	0.20017	-0.20017	0	0.924449	0.925365	-0.925365	2	0.647604	0.648236	1.35176
7.5465	7546.5	1	0.447414	0.448541	0.551459	0	0.197885	0.19855	-0.19855	1	0.926762	0.927586	0.0724139	1	0.647238	0.647806	0.352193
7.5565	7556.5	2	0.446524	0.447512	1.55249	0	0.19634	0.196922	-0.196922	2	0.929076	0.929797	1.0702	3	0.646872	0.64737	2.35263
7.5665	7566.5	0	0.445635	0.446477	-0.446477	0	0.194794	0.195291	-0.195291	1	0.931389	0.932005	0.0679956	1	0.646505	0.64693	0.35307
7.5765	7576.5	1	0.444745	0.445444	0.554556	1	0.193249	0.193661	0.806339	0	0.933703	0.934214	-0.934214	1	0.646139	0.646491	0.353509
7.5865	7586.5	2	0.443855	0.44442	1.55558	2	0.191703	0.192036	1.80796	1	0.936016	0.936429	0.0635709	2	0.645772	0.646057	1.35394
7.5965	7596.5	0	0.442966	0.44341	-0.44341	1	0.190157	0.19042	0.80958	1	0.93833	0.938655	0.0613453	0	0.645406	0.64563	-0.64563
7.6065	7606.5	1	0.442076	0.442417	0.557583	0	0.188612	0.188813	-0.188813	0	0.940643	0.940892	-0.940892	4	0.64504	0.645212	3.35479
7.6165	7616.5	0	0.441186	0.441441	-0.441441	0	0.187066	0.187216	-0.187216	2	0.942957	0.943142	1.05686	0	0.644673	0.644802	-0.644802
7.6265	7626.5	0	0.440296	0.440481	-0.440481	0	0.185521	0.18563	-0.18563	2	0.94527	0.945405	1.05459	2	0.644307	0.6444	1.3556
7.6365	7636.5	0	0.439407	0.439538	-0.439538	1	0.183975	0.184052	0.815948	0	0.947584	0.947679	-0.947679	1	0.643941	0.644006	0.355994
7.6465	7646.5	0	0.438517	0.438607	-0.438607	0	0.182429	0.182483	-0.182483	0	0.949897	0.949963	-0.949963	0	0.643574	0.64362	-0.64362
7.6565	7656.5	0	0.437628	0.437688	-0.437688	0	0.180884	0.18092	-0.18092	0	0.95221	0.952255	-0.952255	0	0.643208	0.643238	-0.643238
7.6665	7666.5	0	0.436738	0.436777	-0.436777	1	0.179338	0.179362	0.820639	1	0.954524	0.954553	0.0454471	1	0.642841	0.642861	0.357139
7.6765	7676.5	2	0.435848	0.435873	1.56413	0	0.177793	0.177808	-0.177808	1	0.956838	0.956856	0.0431441	0	0.642475	0.642488	-0.642488
7.6865	7686.5	1	0.434958	0.434974	0.565026	1	0.176247	0.176256	0.823744	2	0.959151	0.959162	1.04084	0	0.642109	0.642116	-0.642116
7.6965	7696.5	2	0.434069	0.434078	1.56592	0	0.174702	0.174707	-0.174707	0	0.961465	0.961471	-0.961471	2	0.641742	0.641747	1.35825
7.7065	7706.5	0	0.433179	0.433184	-0.433184	1	0.173156	0.173159	0.826841	0	0.963778	0.963782	-0.963782	1	0.641376	0.641378	0.358621
7.7165	7716.5	2	0.432289	0.432293	1.56771	0	0.17161	0.171612	-0.171612	0	0.966091	0.966094	-0.966094	0	0.641009	0.641011	-0.641011
7.7265	7726.5	0	0.4314	0.431401	-0.431401	2	0.170065	0.170066	1.82993	0	0.968405	0.968406	-0.968406	1	0.640643	0.640644	0.359356
7.7365	7736.5	2	0.43051	0.430511	1.56949	0	0.168519	0.16852	-0.16852	0	0.970719	0.970719	-0.970719	0	0.640277	0.640277	-0.640277
7.7465	7746.5	1	0.42962	0.42962	0.57038	0	0.166973	0.166973	-0.166973	2	0.973032	0.973032	1.02697	0	0.63991	0.63991	-0.63991
7.7565	7756.5	2	0.428731	0.428731	1.57127	0	0.165428	0.165428	-0.165428	0	0.975345	0.975345	-0.975345	1	0.639544	0.639544	0.360456
7.7665	7766.5	0	0.427841	0.427841	-0.427841	1	0.163882	0.163882	0.836118	0	0.977659	0.977659	-0.977659	2	0.639177	0.639177	1.36082
7.7765	7776.5	1	0.426951	0.431855	0.568145	0	0.162337	0.165578	-0.165578	0	0.979973	0.983926	-0.983926	0	0.638811	0.643195	-0.643195
7.7865	7786.5	1	0.426061	0.435197	0.564803	0	0.160791	0.166829	-0.166829	0	0.982286	0.989651	-0.989651	1	0.638445	0.646612	0.353388
7.7965	7796.5	3	0.425172	0.4519	2.5481	1	0.159246	0.176911	0.823089	0	0.984599	1.00615	-1.00615	0	0.638078	0.661973	-0.661973
7.8065	7806.5	0	0.424282	0.472519	-0.472519	1	0.1577	0.189581	0.810419	2	0.986913	1.0258	0.974197	1	0.637712	0.680835	0.319165
7.8165	7816.5	0	0.423392	0.508331	-0.508331	0	0.156154	0.212293	-0.212293	0	0.989227	1.05771	-1.05771	0	0.637346	0.71328	-0.71328
7.8265	7826.5	0	0.422503	0.568432	-0.568432	0	0.154609	0.251057	-0.251057	0	0.99154	1.10919	-1.10919	0	0.636979	0.767438	-0.767438
7.8365	7836.5	0	0.421613	0.666231	-0.666231	0	0.153063	0.314738	-0.314738	0	0.993853	1.19107	-1.19107	0	0.636613	0.855298	-0.855298
7.8465	7846.5	1	0.420723	0.820807	0.179193	0	0.151518	0.415944	-0.415944	1	0.996167	1.31872	-0.318722	1	0.636246	0.993916	0.00608432
7.8565	7856.5	4	0.419834	1.05829	2.94171	2	0.149972	0.571944	1.42806	3	0.99848	1.51322	1.48678	1	0.63588	1.20665	-0.206651
7.8665	7866.5	1	0.418944	1.41305	-0.413045	2	0.148426	0.805455	1.19454	1	1.00079	1.80226	-0.802257	1	0.635513	1.52423	-0.524227
7.8765	7876.5	2	0.418054	1.92832	0.0716841	0	0.146881	1.14505	-1.14505	2	1.00311	2.22071	-0.22071	3	0.635147	1.9853	1.0147
7.8865	7886.5	3	0.417165	2.65587	0.344127	1	0.145335	1.62496	-0.624958	2	1.00542	2.81031	-0.810311	2	0.634781	2.63616	-0.636157
7.8965	7896.5	7	0.416275	3.65421	3.34579	1	0.14379	2.28383	-1.28383	4	1.00773	3.61822	0.381782	3	0.634414	3.52908	-0.529083
7.9065	7906.5	5	0.415385	4.98483	0.0151682	2	0.142244	3.16232	-1.16232	2	1.01005	4.69403	-2.69403	5	0.634048	4.71907	0.280926
7.9165	7916.5	8	0.414496	6.70646	1.29354	5	0.140698	4.29923	0.70077	6	1.01236	6.08507	-0.0850668	7	0.633682	6.25862	0.741384
7.9265	7926.5	6	0.413606	8.86709	-2.86709	6	0.139153	5.72629	0.273706	7	1.01467	7.83004	-0.830043	5	0.633315	8.19062	-3.19062
7.9365	7936.5	10	0.412716	11.4946	-1.49458	7	0.137607	7.46191	-0.461912	4	1.01699	9.9514	-5.9514	14	0.632949	10.54	3.46001
7.9465	7946.5	13	0.411826	14.5866	-1.58661	11	0.136062	9.50456	1.49544	5	1.0193	12.4473	-7.44729	18	0.632582	13.3047	4.69535
7.9565	7956.5	28	0.410937	18.1017	9.89831	12	0.134516	11.8268	0.173181	11	1.02161	15.2843	-4.28425	15	0.632216	16.4475	-1.44752
7.9665	7966.5	27	0.410047	21.9528	5.04717	15	0.13297	14.3712	0.628815	14	1.02393	18.3921	-4.39214	24	0.63185	19.8908	4.10918
7.9765	7976.5	34	0.409157	26.0057	7.99428	17	0.131425	17.0489	-0.048893	26	1.02624	21.6627	4.3373	24	0.631483	23.5145	0.485521
7.9865	7986.5	29	0.408268	30.0828	-1.08284	23	0.129879	19.7426	3.25738	21	1.02856	24.9528	-3.95278	27	0.631117	27.1598	-0.1598
7.9965	7996.5	38	0.407378	33.9741	4.02593	13	0.128334	22.3135	-9.31348	33	1.03087	28.093	4.90701	33	0.63075	30.6389	2.36107
8.0065	8006.5	37	0.406488	37.4534	-0.453365	27	0.126788	24.6121	2.38792	30	1.03318	30.9011	-0.901102	35	0.630384	33.7498	1.25019
8.0165	8016.5	36	0.405599	40.3	-4.29997	28	0.125243	26.4925	1.50747	33	1.0355	33.1991	-0.199123	18	0.630018	36.2951	-18.2951
8.0265	8026.5	42	0.404709	42.3213	-0.321308	27	0.123697	27.8275	-0.827524	35	1.03781	34.8318	0.168205	40	0.629651	38.1025	1.89746
8.0365	8036.5	26	0.403819	43.3745	-17.3745	27	0.122151	28.5226	-1.52263	37	1.04012	35.6839	1.3161	41	0.629285	39.0445	1.95551
8.0465	8046.5	53	0.40293	43.3829	9.61707	22	0.120606	28.5273	-6.52726	35	1.04244	35.6938	-0.693752	41	0.628919	39.0525	1.94752
8.0565	8056.5	50	0.40204	42.3457	7.65433	29	0.11906	27.8407	1.15925	32	1.04475	34.8605	-2.86053	38	0.628552	38.1256	-0.125614
8.0665	8066.5	35	0.40115	40.3374	-5.33742	20	0.117514	26.5125	-6.51248	33	1.04706	33.2445	-0.244469	34	0.628186	36.3307	-2.33069
8.0765	8076.5	35	0.400261	37.4997	-2.49967	28	0.115969	24.636	3.36402	34	1.04938	30.9596	3.04035	43	0.627819	33.7942	9.20579
8.0865	8086.5	33	0.399371	34.0243	-1.02426	22	0.114423	22.338	-0.338034	36	1.05169	28.1607	7.83926	24	0.627453	30.6877	-6.68767
8.0965	8096.5	31	0.398481	30.1319	0.868086	22	0.112878	19.7645	2.23549	26	1.054	25.0257	0.97432	33	0.627087	27.2084	5.79161
8.1065	8106.5	29	0.397591	26.0492	2.95076	24	0.111332	17.0652	6.93479	21	1.05632	21.7372	-0.737181	18	0.62672	23.559	-5.55896
8.1165	8116.5	12	0.396702	21.9874	-9.98744	17	0.109787	14.3797	2.6203	18	1.05863	18.4655	-0.465508	21	0.626354	19.9282	1.07181
8.1265	8126.5	18	0.395812	18.1253	-0.125338	12	0.108241	11.8262	0.173831	15	1.06095	15.3548	-0.354835	16	0.625987	16.476	-0.475952
8.1365	8136.5	17	0.394922	14.5986	2.40144	17	0.106695	9.49427	7.50573	11	1.06326	12.5145	-1.51451	16	0.625621	13.3235	2.67651
8.1465	8146.5	11	0.394033	11.4953	-0.495251	8	0.10515	7.44225	0.557751	10	1.06557	10.0156	-0.0155916	9	0.625255	10.5496	-1.5496
8.1565	8156.5	11	0.393143	8.85772	2.14228	9	0.103604	5.69808	3.30192	6	1.06788	7.8922	-1.8922	14	0.624888	8.19211	5.80789
8.1665	8166.5	7	0.392253	6.68875	0.311248	12	0.102059	4.26359	7.73641	6	1.0702	6.14656	-0.146559	8	0.624522	6.25351	1.74649
8.1765	8176.5	10	0.391364	4.96064	5.03936	6	0.100513	3.12047	2.87953	2	1.07251	4.75635	-2.75635	7	0.624155	4.70903	2.29097
8.1865	8186.5	4	0.390474	3.62525	0.374746	2	0.0989674	2.23692	-0.236922	5	1.07483	3.68277	1.31723	5	0.623789	3.51564	1.48436
8.1965	8196.5	5	0.389584	2.6236	2.3764	3	0.0974218	1.57395	1.42605	1	1.07714	2.87825	-1.87825	5	0.623423	2.62061	2.37939
8.2065	8206.5	1	0.388695	1.89381	-0.893808	3	0.0958762	1.09065	1.90935	0	1.07945	2.2929	-2.2929	2	0.623056	1.96861	0.0313921
8.2165	8216.5	3	0.387805	1.37701	1.62299	3	0.0943306	0.748124	2.25188	3	1.08177	1.87928	1.12072	2	0.62269	1.50703	0.492973
8.2265	8226.5	1	0.386915	1.02113	-0.0211269	2	0.092785	0.511953	1.48805	1	1.08408	1.59539	-0.595394	1	0.622324	1.1893	-0.1893
8.2365	8236.5	0	0.386026	0.782676	-0.782676	3	0.0912394	0.353396	2.6466	0	1.08639	1.40618	-1.40618	0	0.621957	0.976557	-0.976557
8.2465	8246.5	1	0.385136	0.627128	0.372872	2	0.0896938	0.249633	1.75037	1	1.08871	1.28381	-0.283806	3	0.621591	0.837929	2.16207
8.2565	8256.5	1	0.384246	0.528263	0.471737	0	0.0881482	0.183333	-0.183333	1	1.09102	1.20713	-0.207129	0	0.621224	0.749973	-0.749973
8.2665	8266.5	0	0.383356	0.466962	-0.466962	0	0.0866027	0.14186	-0.14186	1	1.09333	1.16074	-0.160738	1	0.620858	0.6956	0.3044
8.2765	8276.5	1	0.382467	0.4236	0.5764	1	0.0850571	0.112243	0.887757	2	1.09565	1.12881	0.871191	1	0.620492	0.657264	0.342736
8.2865	8286.5	0	0.381577	0.404447	-0.404447	1	0.0835115	0.0986268	0.901373	0	1.09796	1.1164	-1.1164	0	0.620125	0.640571	-0.640571
8.2965	8296.5	2	0.380687	0.380688	1.61931	2	0.0819659	0.0819661	1.91803	0	1.10027	1.10027	-1.10027	0	0.619759	0.619759	-0.619759
8.3065	8306.5	0	0.379798	0.379798	-0.379798	0	0.0804203	0.0804206	-0.0804206	1	1.10259	1.10259	-0.102588	2	0.619392	0.619393	1.38061
8.3165	8316.5	1	0.378908	0.378909	0.621091	1	0.0788747	0.0788752	0.921125	1	1.1049	1.1049	-0.104902	0	0.619026	0.619027	-0.619027
8.3265	8326.5	1	0.378018	0.37802	0.62198	1	0.0773291	0.07733	0.92267	0	1.10722	1.10722	-1.10722	0	0.61866	0.61866	-0.61866
8.3365	8336.5	0	0.377129	0.377131	-0.377131	0	0.0757835	0.0757849	-0.0757849	0	1.10953	1.10953	-1.10953	1	0.618293	0.618294	0.381706
8.3465	8346.5	0	0.376239	0.376243	-0.376243	0	0.0742379	0.0742401	-0.0742401	1	1.11184	1.11184	-0.111844	0	0.617927	0.617929	-0.617929
8.3565	8356.5	0	0.375349	0.375355	-0.375355	0	0.0726923	0.0726956	-0.0726956	1	1.11416	1.11416	-0.114159	0	0.61756	0.617563	-0.617563
8.3665	8366.5	1	0.37446	0.374468	0.625532	1	0.0711467	0.0711515	0.928848	0	1.11647	1.11648	-1.11648	0	0.617194	0.617198	-0.617198
8.3765	8376.5	0	0.37357	0.373582	-0.373582	0	0.0696011	0.069608	-0.069608	0	1.11878	1.11879	-1.11879	1	0.616828	0.616834	0.383166
8.3865	8386.5	0	0.372803	0.372819	-0.372819	0	0.0681152	0.0681249	-0.0681249	2	1.12061	1.12062	0.879382	1	0.616577	0.616585	0.383415
8.3965	8396.5	1	0.423584	0.423606	0.576394	0	0.0980225	0.0980357	-0.0980357	1	0.96875	0.968766	0.0312335	0	0.623779	0.623791	-0.623791
8.4065	8406.5	0	0.471436	0.471466	-0.471466	0	0.12677	0.126788	-0.126788	1	0.828125	0.828147	0.171853	1	0.62915	0.629166	0.370834
8.4165	8416.5	2	0.515869	0.515908	1.48409	1	0.154175	0.154198	0.845802	0	0.697754	0.697783	-0.697783	1	0.632629	0.632649	0.367351
8.4265	8426.5	1	0.557129	0.557179	0.442821	0	0.180542	0.180572	-0.180572	0	0.577148	0.577185	-0.577185	1	0.634216	0.634242	0.365758
8.4365	8436.5	0	0.594849	0.594911	-0.594911	0	0.205383	0.20542	-0.20542	1	0.467773	0.467819	0.532181	0	0.633911	0.633943	-0.633943
8.4465	8446.5	1	0.629517	0.629593	0.370407	0	0.229187	0.229232	-0.229232	0	0.368652	0.368708	-0.368708	0	0.631775	0.631813	-0.631813
8.4565	8456.5	0	0.660644	0.660735	-0.660735	0	0.251587	0.25164	-0.25164	0	0.278809	0.278875	-0.278875	1	0.627747	0.627792	0.372208
8.4665	8466.5	0	0.688599	0.688704	-0.688704	0	0.272827	0.272889	-0.272889	0	0.201172	0.201248	-0.201248	0	0.621765	0.621818	-0.621818
8.4765	8476.5	1	0.713257	0.713376	0.286625	1	0.292786	0.292856	0.707144	0	0.133301	0.133387	-0.133387	0	0.613892	0.613951	-0.613951
8.4865	8486.5	0	0.734741	0.734872	-0.734872	0	0.311584	0.311662	-0.311662	0	0.074707	0.0748029	-0.0748029	2	0.604248	0.604314	1.39569
8.4965	8496.5	1	0.75293	0.753071	0.246929	1	0.328979	0.329063	0.670937	0	0.027832	0.0279355	-0.0279355	1	0.592651	0.592723	0.407277
8.5065	8506.5	0	0.7677	0.767849	-0.767849	0	0.345215	0.345303	-0.345303	0	-0.00976562	-0.00965665	0.00965665	1	0.579163	0.579238	0.420762
8.5165	8516.5	0	0.779175	0.779328	-0.779328	0	0.360229	0.36032	-0.36032	0	-0.0361328	-0.0360207	0.0360207	0	0.563782	0.563859	-0.563859
8.5265	8526.5	1	0.787109	0.787263	0.212737	0	0.37384	0.373931	-0.373931	0	-0.0517578	-0.0516452	0.0516452	0	0.546509	0.546586	-0.546586
8.5365	8536.5	1	0.792114	0.792265	0.207735	1	0.386352	0.386442	0.613558	0	-0.0576172	-0.0575068	0.0575068	0	0.527405	0.527481	-0.527481
8.5465	8546.5	1	0.793701	0.793846	0.206154	1	0.397522	0.397607	0.602393	0	-0.0532227	-0.053117	0.053117	1	0.506348	0.506421	0.493579
8.5565	8556.5	0	0.792114	0.792249	-0.792249	0	0.407532	0.407611	-0.407611	0	-0.0380859	-0.0379872	0.0379872	0	0.483459	0.483528	-0.483528
8.5665	8566.5	1	0.787109	0.787233	0.212767	1	0.416138	0.41621	0.58379	0	-0.012207	-0.0121169	0.0121169	0	0.458618	0.45868	-0.45868
8.5765	8576.5	1	0.778686	0.778796	0.221204	0	0.423706	0.423771	-0.423771	1	0.0224609	0.0225412	0.977459	1	0.432007	0.432062	0.567938
8.5865	8586.5	1	0.76709	0.767185	0.232815	0	0.429871	0.429927	-0.429927	0	0.0693359	0.0694058	-0.0694058	1	0.403564	0.403613	0.596387
8.5965	8596.5	1	0.752319	0.752401	0.2476	0	0.434753	0.434801	-0.434801	0	0.125488	0.125548	-0.125548	0	0.373108	0.373149	-0.373149
8.6065	8606.5	2	0.734131	0.734198	1.2658	0	0.438538	0.438577	-0.438577	1	0.192383	0.192432	0.807568	1	0.34082	0.340854	0.659146
8.6165	8616.5	1	0.712646	0.712701	0.287299	1	0.440979	0.441011	0.558989	0	0.270508	0.270548	-0.270548	0	0.306519	0.306546	-0.306546
8.6265	8626.5	2	0.687988	0.688031	1.31197	0	0.4422	0.442225	-0.442225	0	0.357422	0.357453	-0.357453	1	0.270447	0.270469	0.729531
8.6365	8636.5	0	0.659912	0.659945	-0.659945	2	0.442078	0.442097	1.5579	0	0.456055	0.456079	-0.456079	0	0.232483	0.2325	-0.2325
8.6465	8646.5	1	0.628418	0.630708	0.369292	0	0.440796	0.442308	-0.442308	0	0.564941	0.566786	-0.566786	0	0.192627	0.194665	-0.194665
8.6565	8656.5	0	0.593872	0.597974	-0.597974	0	0.438171	0.440881	-0.440881	1	0.683594	0.686899	0.313101	0	0.150879	0.154539	-0.154539
8.6665	8666.5	0	0.555908	0.563114	-0.563114	1	0.434387	0.439149	0.560851	2	0.812988	0.818797	1.1812	0	0.107239	0.113675	-0.113675
8.6765	8676.5	0	0.514648	0.527037	-0.527037	0	0.429382	0.43757	-0.43757	0	0.952637	0.962624	-0.962624	0	0.0617065	0.0727783	-0.0727783
8.6865	8686.5	0	0.470093	0.490921	-0.490921	1	0.423096	0.436861	0.563139	1	1.10303	1.11982	-0.119819	0	0.0142822	0.0328999	-0.0328999
8.6965	8696.5	1	0.467169	0.501396	0.498604	0	0.419774	0.442396	-0.442396	0	1.09194	1.11953	-1.11953	0	0.017358	0.047955	-0.047955
8.7065	8706.5	1	0.464245	0.519214	0.480786	0	0.416453	0.452784	-0.452784	2	1.08085	1.12517	0.874833	0	0.0204337	0.0695743	-0.0695743
8.7165	8716.5	2	0.461321	0.547592	1.45241	0	0.413132	0.470151	-0.470151	0	1.06976	1.13932	-1.13932	0	0.0235094	0.100634	-0.100634
8.7265	8726.5	0	0.458397	0.59071	-0.59071	1	0.409811	0.49726	0.50274	0	1.05867	1.16535	-1.16535	0	0.0265852	0.144871	-0.144871
8.7365	8736.5	0	0.455473	0.653773	-0.653773	0	0.406489	0.537552	-0.537552	0	1.04758	1.20746	-1.20746	0	0.0296609	0.206939	-0.206939
8.7465	8746.5	2	0.452548	0.74297	1.25703	0	0.403168	0.595115	-0.595115	5	1.0365	1.27064	3.72936	0	0.0327366	0.292369	-0.292369
8.7565	8756.5	0	0.449624	0.865261	-0.865261	2	0.399847	0.674552	1.32545	1	1.02541	1.3605	-0.360502	0	0.0358124	0.407386	-0.407386
8.7665	8766.5	0	0.4467	1.02798	-1.02798	3	0.396525	0.780706	2.21929	0	1.01432	1.48295	-1.48295	3	0.0388881	0.55854	2.44146
8.7765	8776.5	1	0.443776	1.23816	-0.238159	1	0.393204	0.918233	0.0817668	0	1.00323	1.64368	-1.64368	0	0.0419639	0.752131	-0.752131
8.7865	8786.5	3	0.440852	1.50172	1.49828	2	0.389883	1.09104	0.908963	1	0.992142	1.84743	-0.847432	1	0.0450396	0.993438	0.00656205
8.7965	8796.5	3	0.437928	1.82236	1.17764	1	0.386562	1.30157	-0.301569	2	0.981054	2.09721	-0.0972083	0	0.0481153	1.28578	-1.28578
8.8065	8806.5	4	0.435004	2.20049	1.79951	0	0.38324	1.5501	-1.5501	1	0.969966	2.39333	-1.39333	3	0.0511911	1.62951	1.37049
8.8165	8816.5	1	0.43208	2.63216	-1.63216	1	0.379919	1.83401	-0.834009	2	0.958877	2.73262	-0.732621	1	0.0542668	2.0211	-1.0211
8.8265	8826.5	4	0.429156	3.10828	0.89172	1	0.376598	2.1473	-1.1473	5	0.947789	3.10775	1.89225	3	0.0573425	2.45244	0.547556
8.8365	8836.5	5	0.426232	3.61431	1.38569	5	0.373276	2.48037	2.51963	2	0.9367	3.50699	-1.50699	6	0.0604183	2.91052	3.08948
8.8465	8846.5	0	0.423308	4.13052	-4.13052	2	0.369955	2.82015	-0.820152	4	0.925612	3.91444	0.085562	3	0.063494	3.37769	-0.377693
8.8565	8856.5	4	0.420384	4.63295	-0.632949	4	0.366634	3.15083	0.849167	5	0.914523	4.31078	0.689224	2	0.0665698	3.83255	-1.83255
8.8665	8866.5	3	0.41746	5.09511	-2.09511	7	0.363312	3.4549	3.5451	7	0.903435	4.67464	2.32536	5	0.0696455	4.2514	0.748601
8.8765	8876.5	12	0.414536	5.49016	6.50984	2	0.359991	3.71461	-1.71461	4	0.892346	4.98441	-0.984411	2	0.0727213	4.61026	-2.61026
8.8865	8886.5	3	0.411612	5.79347	-2.79347	4	0.35667	3.91369	0.0863113	9	0.881258	5.22022	3.77978	10	0.075797	4.88711	5.11289
8.8965	8896.5	8	0.408688	5.98513	2.01487	1	0.353349	4.03897	-3.03897	7	0.870169	5.366	1.634	4	0.0788727	5.06414	-1.06414
8.9065	8906.5	3	0.405764	6.05205	-3.05205	4	0.350027	4.08181	-0.0818129	6	0.859081	5.41123	0.588773	5	0.0819485	5.12965	-0.129655
8.9165	8916.5	11	0.40284	5.98947	5.01053	3	0.346706	4.03906	-1.03906	4	0.847992	5.35205	-1.35204	5	0.0850242	5.0794	-0.079402
8.9265	8926.5	7	0.399915	5.80147	1.19853	5	0.343385	3.91342	1.08658	8	0.836904	5.19174	2.80826	2	0.0881	4.91702	-2.91702
8.9365	8936.5	11	0.396991	5.5005	5.4995	4	0.340064	3.71311	0.28689	3	0.825815	4.94036	-1.94036	3	0.0911757	4.65364	-1.65364
8.9465	8946.5	4	0.394067	5.10601	-1.10601	4	0.336742	3.45099	0.549007	5	0.814727	4.61359	0.386414	10	0.0942514	4.30667	5.69333
8.9565	8956.5	5	0.391143	4.64247	0.357529	3	0.333421	3.14323	-0.143231	4	0.803638	4.23113	-0.231132	8	0.0973272	3.89791	4.10209
8.9665	8966.5	5	0.388219	4.13649	0.863509	4	0.3301	2.80742	1.19258	3	0.79255	3.81446	-0.814464	4	0.100403	3.45123	0.548774
8.9765	8976.5	0	0.385295	3.61477	-3.61477	2	0.326778	2.4612	-0.461201	0	0.781461	3.3851	-3.3851	4	0.103479	2.99044	1.00956
8.9865	8986.5	2	0.382371	3.10187	-1.10187	2	0.323457	2.12078	-0.12078	4	0.770373	2.96281	1.03719	4	0.106554	2.53738	1.46262
8.9965	8996.5	2	0.379447	2.61761	-0.617605	1	0.320136	1.79928	-0.79928	1	0.759284	2.56361	-1.56361	1	0.10963	2.10988	-1.10988
9.0065	9006.5	3	0.376523	2.17727	0.822727	2	0.316814	1.50679	0.493215	2	0.748196	2.19979	-0.19979	1	0.112706	1.72149	-0.72149
9.0165	9016.5	0	0.373599	1.79061	-1.79061	2	0.313493	1.24971	0.750285	2	0.737107	1.87919	0.120808	0	0.115782	1.38082	-1.38082
9.0265	9026.5	2	0.370675	1.46227	0.537727	2	0.310172	1.03112	0.968876	3	0.726019	1.60554	1.39446	3	0.118857	1.09191	1.90809
9.0365	9036.5	1	0.367751	1.19261	-0.192612	0	0.306851	0.851212	-0.851212	0	0.71493	1.37909	-1.37909	4	0.121933	0.854908	3.14509
9.0465	9046.5	0	0.364827	0.97873	-0.97873	0	0.303529	0.708021	-0.708021	2	0.703842	1.19746	0.802542	0	0.125009	0.66698	-0.66698
9.0565	9056.5	2	0.361903	0.815615	1.18439	0	0.300208	0.598187	-0.598187	1	0.692753	1.05655	-0.0565464	0	0.128085	0.523356	-0.523356
9.0665	9066.5	0	0.358979	0.697214	-0.697214	0	0.296887	0.51764	-0.51764	0	0.681665	0.951403	-0.951403	0	0.13116	0.418258	-0.418258
9.0765	9076.5	3	0.356055	0.617299	2.3827	2	0.293565	0.462187	1.53781	2	0.670576	0.876926	1.12307	1	0.134236	0.345689	0.654311
9.0865	9086.5	0	0.353131	0.570102	-0.570102	0	0.290244	0.427926	-0.427926	2	0.659488	0.82837	1.17163	1	0.137312	0.300008	0.699992
9.0965	9096.5	0	0.350206	0.550669	-0.550669	1	0.286923	0.41149	0.588511	0	0.648399	0.801643	-0.801643	0	0.140387	0.276278	-0.276278
9.1065	9106.5	0	0.347282	0.554985	-0.554985	0	0.283602	0.410134	-0.410134	1	0.637311	0.793413	0.206587	0	0.143463	0.270413	-0.270413
9.1165	9116.5	0	0.344358	0.579882	-0.579882	0	0.28028	0.421687	-0.421687	2	0.626222	0.801043	1.19896	0	0.146539	0.279157	-0.279157
9.1265	9126.5	0	0.341434	0.622816	-0.622816	0	0.276959	0.444415	-0.444415	0	0.615134	0.822425	-0.822425	2	0.149615	0.299943	1.70006
9.1365	9136.5	0	0.33851	0.681553	-0.681553	0	0.273638	0.476826	-0.476826	1	0.604045	0.855743	0.144257	0	0.152691	0.330693	-0.330693
9.1465	9146.5	1	0.335586	0.75384	0.24616	1	0.270316	0.517467	0.482534	0	0.592957	0.89922	-0.89922	0	0.155766	0.369589	-0.369589
9.1565	9156.5	0	0.332662	0.837107	-0.837107	0	0.266995	0.564735	-0.564735	1	0.581868	0.950883	0.0491173	0	0.158842	0.414862	-0.414862
9.1665	9166.5	2	0.329738	0.92587	1.07413	0	0.263674	0.61517	-0.61517	0	0.57078	1.00649	-1.00649	0	0.161918	0.462503	-0.462503
9.1765	9176.5	1	0.326814	1.02222	-0.0222176	1	0.260352	0.670382	0.329618	0	0.559691	1.06795	-1.06795	1	0.164993	0.515634	0.484366
9.1865	9186.5	1	0.32389	1.11785	-0.117853	1	0.257031	0.725174	0.274826	0	0.548603	1.1289	-1.1289	0	0.168069	0.568406	-0.568406
9.1965	9196.5	1	0.320966	1.20818	-0.208182	1	0.25371	0.776838	0.223162	1	0.537514	1.18597	-0.18597	0	0.171145	0.618502	-0.618502
9.2065	9206.5	2	0.318042	1.28838	0.711625	2	0.250389	0.822525	1.17748	1	0.526426	1.23563	-0.235631	1	0.174221	0.663488	0.336512
9.2165	9216.5	1	0.315118	1.35377	-0.353771	0	0.247067	0.859487	-0.859487	0	0.515337	1.27448	-1.27448	1	0.177296	0.701012	0.298988
9.2265	9226.5	1	0.312194	1.40031	-0.400307	0	0.243746	0.885328	-0.885328	0	0.504249	1.29954	-1.29954	1	0.180372	0.729027	0.270973
9.2365	9236.5	2	0.30927	1.42491	0.575085	0	0.240425	0.898241	-0.898241	0	0.49316	1.30857	-1.30857	0	0.183448	0.745985	-0.745985
9.2465	9246.5	1	0.306346	1.42584	-0.425838	0	0.237103	0.897188	-0.897188	2	0.482072	1.3003	0.699704	1	0.186524	0.751	0.249
9.2565	9256.5	0	0.303422	1.40281	-1.40281	0	0.233782	0.882016	-0.882016	1	0.470983	1.27452	-0.274517	2	0.189599	0.743942	1.25606
9.2665	9266.5	2	0.300498	1.35711	0.64289	1	0.230461	0.85347	0.14653	2	0.459895	1.23216	0.76784	0	0.192675	0.725446	-0.725446
9.2765	9276.5	1	0.297573	1.29138	-0.29138	2	0.22714	0.813116	1.18688	4	0.448806	1.17517	2.82483	0	0.195751	0.696854	-0.696854
9.2865	9286.5	1	0.29465	1.2094	-0.209403	0	0.223818	0.763183	-0.763183	1	0.437718	1.1063	-0.106301	0	0.198826	0.660069	-0.660069
9.2965	9296.5	1	0.291725	1.1157	-0.115704	1	0.220497	0.706338	0.293662	0	0.426629	1.02886	-1.02886	0	0.201902	0.617373	-0.617373
9.3065	9306.5	2	0.288801	1.01512	0.984878	1	0.217176	0.645435	0.354565	0	0.415541	0.9464	-0.9464	0	0.204978	0.571207	-0.571207
9.3165	9316.5	1	0.285877	0.912396	0.0876044	0	0.213855	0.583268	-0.583268	0	0.404452	0.862367	-0.862367	0	0.208054	0.52396	-0.52396
9.3265	9326.5	1	0.282953	0.811793	0.188207	0	0.210533	0.522352	-0.522352	1	0.393364	0.779887	0.220113	0	0.211129	0.477784	-0.477784
9.3365	9336.5	0	0.280029	0.716838	-0.716838	0	0.207212	0.464767	-0.464767	0	0.382275	0.701534	-0.701534	0	0.214205	0.434455	-0.434455
9.3465	9346.5	2	0.277105	0.630147	1.36985	1	0.203891	0.412055	0.587945	2	0.371187	0.629221	1.37078	0	0.217281	0.395294	-0.395294
9.3565	9356.5	0	0.274181	0.553385	-0.553385	2	0.20057	0.365196	1.6348	0	0.360098	0.564165	-0.564165	1	0.220357	0.361138	0.638861
9.3665	9366.5	0	0.271257	0.487314	-0.487314	0	0.197248	0.324642	-0.324642	0	0.34901	0.506923	-0.506923	1	0.223432	0.332374	0.667626
9.3765	9376.5	0	0.268333	0.431923	-0.431923	0	0.193927	0.290384	-0.290384	0	0.337921	0.457487	-0.457487	0	0.226508	0.308994	-0.308994
9.3865	9386.5	0	0.265409	0.386603	-0.386603	0	0.190606	0.262065	-0.262065	0	0.326833	0.415412	-0.415412	1	0.229584	0.290693	0.709307
9.3965	9396.5	0	0.262485	0.350332	-0.350332	1	0.187284	0.239082	0.760918	1	0.315744	0.379951	0.620049	1	0.232659	0.276954	0.723046
9.4065	9406.5	0	0.259561	0.321862	-0.321862	0	0.183963	0.220697	-0.220697	0	0.304656	0.350191	-0.350191	0	0.235735	0.267149	-0.267149
9.4165	9416.5	0	0.256637	0.299865	-0.299865	0	0.180642	0.20613	-0.20613	0	0.293567	0.325163	-0.325163	0	0.238811	0.260608	-0.260608
9.4265	9426.5	0	0.253713	0.283058	-0.283058	0	0.177321	0.194624	-0.194624	0	0.282479	0.303928	-0.303928	1	0.241887	0.256684	0.743316
9.4365	9436.5	1	0.250789	0.270279	0.729721	0	0.173999	0.185491	-0.185491	2	0.271391	0.285636	1.71436	1	0.244962	0.25479	0.74521
9.4465	9446.5	0	0.247865	0.260528	-0.260528	0	0.170678	0.178145	-0.178145	0	0.260302	0.269558	-0.269558	0	0.248038	0.254424	-0.254424
9.4565	9456.5	1	0.244941	0.252991	0.747009	0	0.167357	0.172103	-0.172103	1	0.249214	0.255097	0.744903	0	0.251114	0.255173	-0.255173
9.4665	9466.5	0	0.242017	0.247023	-0.247023	1	0.164036	0.166988	0.833012	0	0.238124	0.241783	-0.241783	0	0.25419	0.256714	-0.256714
9.4765	9476.5	0	0.241805	0.24485	-0.24485	0	0.163893	0.165689	-0.165689	0	0.237904	0.24013	-0.24013	1	0.253955	0.255491	0.744509
9.4865	9486.5	1	0.241593	0.243405	0.756595	0	0.163751	0.164819	-0.164819	0	0.237684	0.239009	-0.239009	0	0.253721	0.254635	-0.254635
9.4965	9496.5	0	0.241381	0.242336	-0.242336	0	0.163608	0.164171	-0.164171	0	0.237464	0.238162	-0.238162	0	0.253487	0.253968	-0.253968
9.5065	9506.5	0	0.241169	0.241716	-0.241716	0	0.163466	0.163788	-0.163788	1	0.237244	0.237644	0.762356	1	0.253252	0.253528	0.746472
9.5165	9516.5	0	0.240957	0.240957	-0.240957	0	0.163323	0.163323	-0.163323	0	0.237024	0.237024	-0.237024	0	0.253018	0.253018	-0.253018
9.5265	9526.5	1	0.240746	0.240746	0.759254	0	0.163181	0.163181	-0.163181	0	0.236804	0.236804	-0.236804	0	0.252784	0.252784	-0.252784
9.5365	9536.5	0	0.240534	0.240534	-0.240534	0	0.163039	0.163039	-0.163039	0	0.236585	0.236585	-0.236585	1	0.25255	0.25255	0.74745
9.5465	9546.5	0	0.240323	0.240323	-0.240323	0	0.162897	0.162897	-0.162897	0	0.236365	0.236365	-0.236365	0	0.252316	0.252316	-0.252316
9.5565	9556.5	1	0.240111	0.240111	0.759889	0	0.162755	0.162755	-0.162755	0	0.236146	0.236146	-0.236146	0	0.252083	0.252083	-0.252083
9.5665	9566.5	0	0.2399	0.2399	-0.2399	0	0.162612	0.162612	-0.162612	0	0.235927	0.235927	-0.235927	1	0.251849	0.251849	0.748151
9.5765	9576.5	0	0.239689	0.239689	-0.239689	0	0.16247	0.16247	-0.16247	1	0.235707	0.235707	0.764293	0	0.251615	0.251615	-0.251615
9.5865	9586.5	1	0.239478	0.239478	0.760522	0	0.162329	0.162329	-0.162329	1	0.235488	0.235488	0.764512	0	0.251382	0.251382	-0.251382
9.5965	9596.5	0	0.239267	0.239267	-0.239267	0	0.162187	0.162187	-0.162187	0	0.235269	0.235269	-0.235269	0	0.251149	0.251149	-0.251149
9.6065	9606.5	0	0.239056	0.239056	-0.239056	0	0.162045	0.162045	-0.162045	0	0.23505	0.23505	-0.23505	1	0.250916	0.250916	0.749084
9.6165	9616.5	0	0.238845	0.238845	-0.238845	2	0.161903	0.161903	1.8381	0	0.234831	0.234831	-0.234831	0	0.250682	0.250682	-0.250682
9.6265	9626.5	0	0.238634	0.238634	-0.238634	1	0.161762	0.161762	0.838238	1	0.234613	0.234613	0.765387	0	0.25045	0.25045	-0.25045
9.6365	9636.5	0	0.238424	0.238424	-0.238424	1	0.16162	0.16162	0.83838	0	0.234394	0.234394	-0.234394	0	0.250217	0.250217	-0.250217
9.6465	9646.5	0	0.238213	0.238213	-0.238213	0	0.161478	0.161478	-0.161478	0	0.234176	0.234176	-0.234176	0	0.249984	0.249984	-0.249984
9.6565	9656.5	0	0.238003	0.238003	-0.238003	0	0.161337	0.161337	-0.161337	1	0.233957	0.233957	0.766043	0	0.249751	0.249751	-0.249751
9.6665	9666.5	0	0.237792	0.237792	-0.237792	0	0.161195	0.161195	-0.161195	0	0.233739	0.233739	-0.233739	0	0.249519	0.249519	-0.249519
9.6765	9676.5	0	0.237582	0.237582	-0.237582	0	0.161054	0.161054	-0.161054	0	0.23352	0.23352	-0.23352	0	0.249286	0.249286	-0.249286
9.6865	9686.5	1	0.237372	0.237372	0.762628	0	0.160913	0.160913	-0.160913	0	0.233302	0.233302	-0.233302	0	0.249054	0.249054	-0.249054
9.6965	9696.5	1	0.237162	0.237162	0.762838	0	0.160772	0.160772	-0.160772	0	0.233084	0.233084	-0.233084	0	0.248822	0.248822	-0.248822
9.7065	9706.5	1	0.236952	0.236952	0.763048	1	0.16063	0.16063	0.83937	0	0.232866	0.232866	-0.232866	0	0.248589	0.248589	-0.248589
9.7165	9716.5	0	0.236742	0.236742	-0.236742	0	0.160489	0.160489	-0.160489	0	0.232649	0.232649	-0.232649	0	0.248358	0.248358	-0.248358
9.7265	9726.5	0	0.236532	0.236532	-0.236532	0	0.160348	0.160348	-0.160348	0	0.232431	0.232431	-0.232431	0	0.248126	0.248126	-0.248126
9.7365	9736.5	0	0.236323	0.236323	-0.236323	0	0.160207	0.160207	-0.160207	1	0.232213	0.232213	0.767787	0	0.247894	0.247894	-0.247894
9.7465	9746.5	0	0.236113	0.236113	-0.236113	0	0.160066	0.160066	-0.160066	0	0.231996	0.231996	-0.231996	0	0.247662	0.247662	-0.247662
9.7565	9756.5	0	0.235904	0.235904	-0.235904	0	0.159925	0.159925	-0.159925	1	0.231778	0.231778	0.768222	0	0.24743	0.24743	-0.24743
9.7665	9766.5	0	0.235694	0.235694	-0.235694	0	0.159784	0.159784	-0.159784	0	0.231561	0.231561	-0.231561	1	0.247199	0.247199	0.752801
9.7765	9776.5	1	0.235485	0.235485	0.764515	1	0.159644	0.159644	0.840356	0	0.231344	0.231344	-0.231344	0	0.246968	0.246968	-0.246968
9.7865	9786.5	0	0.235276	0.235276	-0.235276	1	0.159503	0.159503	0.840497	0	0.231127	0.231127	-0.231127	0	0.246736	0.246736	-0.246736
9.7965	9796.5	0	0.235067	0.235067	-0.235067	0	0.159362	0.159362	-0.159362	0	0.230909	0.230909	-0.230909	0	0.246505	0.246505	-0.246505
9.8065	9806.5	0	0.234857	0.234857	-0.234857	0	0.159222	0.159222	-0.159222	0	0.230693	0.230693	-0.230693	0	0.246274	0.246274	-0.246274
9.8165	9816.5	0	0.234649	0.234649	-0.234649	1	0.159081	0.159081	0.840919	0	0.230476	0.230476	-0.230476	0	0.246043	0.246043	-0.246043
9.8265	9826.5	0	0.23444	0.23444	-0.23444	0	0.158941	0.158941	-0.158941	0	0.230259	0.230259	-0.230259	0	0.245812	0.245812	-0.245812
9.8365	9836.5	0	0.234231	0.234231	-0.234231	0	0.158801	0.158801	-0.158801	0	0.230042	0.230042	-0.230042	1	0.245581	0.245581	0.754419
9.8465	9846.5	1	0.234022	0.234022	0.765978	0	0.15866	0.15866	-0.15866	0	0.229826	0.229826	-0.229826	0	0.245351	0.245351	-0.245351
9.8565	9856.5	0	0.233814	0.233814	-0.233814	0	0.15852	0.15852	-0.15852	0	0.229609	0.229609	-0.229609	0	0.24512	0.24512	-0.24512
9.8665	9866.5	0	0.233605	0.233605	-0.233605	0	0.15838	0.15838	-0.15838	0	0.229393	0.229393	-0.229393	0	0.24489	0.24489	-0.24489
9.8765	9876.5	2	0.233397	0.233397	1.7666	1	0.15824	0.15824	0.84176	0	0.229177	0.229177	-0.229177	1	0.244659	0.244659	0.755341
9.8865	9886.5	0	0.233188	0.233188	-0.233188	0	0.1581	0.1581	-0.1581	0	0.228961	0.228961	-0.228961	0	0.244429	0.244429	-0.244429
9.8965	9896.5	0	0.23298	0.23298	-0.23298	1	0.15796	0.15796	0.84204	0	0.228745	0.228745	-0.228745	0	0.244199	0.244199	-0.244199
9.9065	9906.5	0	0.232772	0.232772	-0.232772	1	0.15782	0.15782	0.84218	0	0.228529	0.228529	-0.228529	0	0.243969	0.243969	-0.243969
9.9165	9916.5	1	0.232564	0.232564	0.767436	0	0.15768	0.15768	-0.15768	0	0.228313	0.228313	-0.228313	0	0.243739	0.243739	-0.243739
9.9265	9926.5	0	0.232356	0.232356	-0.232356	0	0.15754	0.15754	-0.15754	1	0.228097	0.228097	0.771903	0	0.243509	0.243509	-0.243509
9.9365	9936.5	0	0.232148	0.232148	-0.232148	0	0.1574	0.1574	-0.1574	0	0.227881	0.227881	-0.227881	0	0.243279	0.243279	-0.243279
9.9465	9946.5	0	0.231941	0.231941	-0.231941	1	0.157261	0.157261	0.842739	0	0.227666	0.227666	-0.227666	0	0.24305	0.24305	-0.24305
9.9565	9956.5	0	0.231733	0.231733	-0.231733	0	0.157121	0.157121	-0.157121	0	0.22745	0.22745	-0.22745	0	0.24282	0.24282	-0.24282
9.9665	9966.5	1	0.231525	0.231525	0.768475	0	0.156981	0.156981	-0.156981	0	0.227235	0.227235	-0.227235	0	0.242591	0.242591	-0.242591
9.9765	9976.5	2	0.231318	0.231318	1.76868	0	0.156842	0.156842	-0.156842	0	0.22702	0.22702	-0.22702	1	0.242362	0.242362	0.757638
9.9865	9986.5	0	0.23111	0.23117	-0.23117	0	0.156703	0.156738	-0.156738	1	0.226805	0.226848	0.773152	0	0.242132	0.242162	-0.242162
9.9965	9996.5	1	0.230903	0.231007	0.768993	0	0.156563	0.156624	-0.156624	0	0.22659	0.226665	-0.226665	0	0.241903	0.241955	-0.241955
10.0065	10006.5	0	0.230696	0.230873	-0.230873	0	0.156424	0.156528	-0.156528	0	0.226375	0.226504	-0.226504	1	0.241674	0.241764	0.758236
10.0165	10016.5	0	0.230489	0.230786	-0.230786	0	0.156285	0.15646	-0.15646	0	0.22616	0.226377	-0.226377	1	0.241445	0.241595	0.758405
10.0265	10026.5	0	0.230282	0.230769	-0.230769	0	0.156145	0.156433	-0.156433	0	0.225945	0.226301	-0.226301	0	0.241217	0.241462	-0.241462
10.0365	10036.5	0	0.230075	0.230858	-0.230858	0	0.156006	0.156468	-0.156468	2	0.22573	0.226303	1.7737	1	0.240988	0.241383	0.758617
10.0465	10046.5	0	0.229868	0.231102	-0.231102	1	0.155867	0.156595	0.843405	0	0.225516	0.226417	-0.226417	0	0.240759	0.241381	-0.241381
10.0565	10056.5	1	0.229661	0.231566	0.768434	0	0.155728	0.156851	-0.156851	0	0.225301	0.226693	-0.226693	0	0.240531	0.241491	-0.241491
10.0665	10066.5	0	0.229455	0.232335	-0.232335	1	0.155589	0.157287	0.842712	1	0.225087	0.227192	0.772808	1	0.240303	0.241755	0.758245
10.0765	10076.5	1	0.229248	0.233516	0.766484	0	0.15545	0.157967	-0.157967	0	0.224873	0.227992	-0.227992	0	0.240074	0.242226	-0.242226
10.0865	10086.5	0	0.229042	0.235238	-0.235238	1	0.155312	0.158965	0.841035	0	0.224659	0.229188	-0.229188	0	0.239846	0.242971	-0.242971
10.0965	10096.5	1	0.228835	0.237651	0.762349	0	0.155173	0.160371	-0.160371	0	0.224444	0.230888	-0.230888	0	0.239618	0.244063	-0.244063
10.1065	10106.5	0	0.228629	0.240918	-0.240918	0	0.155034	0.16228	-0.16228	1	0.22423	0.233212	0.766788	0	0.23939	0.245587	-0.245587
10.1165	10116.5	0	0.228423	0.245208	-0.245208	1	0.154896	0.164792	0.835208	1	0.224017	0.236284	0.763716	0	0.239162	0.247625	-0.247625
10.1265	10126.5	0	0.228217	0.250679	-0.250679	0	0.154757	0.168001	-0.168001	0	0.223803	0.24022	-0.24022	0	0.238935	0.250261	-0.250261
10.1365	10136.5	1	0.228011	0.257465	0.742535	0	0.154618	0.171986	-0.171986	0	0.223589	0.245117	-0.245117	1	0.238707	0.253559	0.746441
10.1465	10146.5	0	0.227805	0.265648	-0.265648	0	0.15448	0.176793	-0.176793	0	0.223376	0.251035	-0.251035	0	0.23848	0.257561	-0.257561
10.1565	10156.5	0	0.227599	0.275239	-0.275239	0	0.154342	0.182431	-0.182431	0	0.223162	0.257981	-0.257981	0	0.238252	0.262273	-0.262273
10.1665	10166.5	0	0.227393	0.286156	-0.286156	0	0.154203	0.188852	-0.188852	0	0.222949	0.265898	-0.265898	0	0.238025	0.267654	-0.267654
10.1765	10176.5	0	0.227188	0.298208	-0.298208	0	0.154065	0.19594	-0.19594	0	0.222736	0.274643	-0.274643	0	0.237797	0.273608	-0.273608
10.1865	10186.5	0	0.226982	0.311084	-0.311084	1	0.153927	0.203516	0.796484	0	0.222522	0.283992	-0.283992	0	0.23757	0.279977	-0.279977
10.1965	10196.5	0	0.226777	0.324361	-0.324361	0	0.153789	0.211327	-0.211327	0	0.222309	0.293632	-0.293632	1	0.237343	0.286548	0.713452
10.2065	10206.5	0	0.226571	0.337514	-0.337514	2	0.153651	0.219066	1.78093	0	0.222096	0.303183	-0.303183	0	0.237117	0.293056	-0.293056
10.2165	10216.5	0	0.226366	0.349951	-0.349951	1	0.153513	0.226382	0.773618	0	0.221884	0.31221	-0.31221	0	0.23689	0.299204	-0.299204
10.2265	10226.5	0	0.226161	0.36105	-0.36105	0	0.153375	0.232909	-0.232909	1	0.221671	0.320259	0.67974	0	0.236663	0.304678	-0.304678
10.2365	10236.5	0	0.225956	0.370213	-0.370213	1	0.153237	0.238295	0.761705	0	0.221458	0.326894	-0.326894	2	0.236436	0.309175	1.69083
10.2465	10246.5	0	0.225751	0.376913	-0.376913	0	0.153099	0.242229	-0.242229	1	0.221246	0.331728	0.668272	0	0.23621	0.31243	-0.31243
10.2565	10256.5	0	0.225546	0.380748	-0.380748	0	0.152961	0.244473	-0.244473	1	0.221033	0.334468	0.665532	0	0.235984	0.314241	-0.314241
10.2665	10266.5	1	0.225341	0.381476	0.618524	0	0.152824	0.244885	-0.244885	2	0.220821	0.334937	1.66506	1	0.235758	0.314484	0.685516
10.2765	10276.5	0	0.225136	0.379039	-0.379039	0	0.152686	0.243431	-0.243431	0	0.220608	0.333094	-0.333094	0	0.235531	0.313133	-0.313133
10.2865	10286.5	0	0.224932	0.373574	-0.373574	0	0.152549	0.240192	-0.240192	0	0.220396	0.329037	-0.329037	0	0.235305	0.310254	-0.310254
10.2965	10296.5	0	0.224727	0.365391	-0.365391	0	0.152411	0.23535	-0.23535	0	0.220184	0.322993	-0.322993	0	0.235079	0.306006	-0.306006
10.3065	10306.5	1	0.224523	0.354951	0.645049	0	0.152274	0.229178	-0.229178	0	0.219972	0.3153	-0.3153	0	0.234853	0.300619	-0.300619
10.3165	10316.5	0	0.224319	0.342815	-0.342815	0	0.152136	0.222005	-0.222005	0	0.21976	0.306368	-0.306368	1	0.234628	0.294377	0.705623
10.3265	10326.5	0	0.224114	0.329599	-0.329599	0	0.151999	0.214196	-0.214196	0	0.219548	0.296646	-0.296646	0	0.234402	0.28759	-0.28759
10.3365	10336.5	0	0.22391	0.315916	-0.315916	0	0.151862	0.206111	-0.206111	0	0.219337	0.286583	-0.286583	0	0.234177	0.280568	-0.280568
10.3465	10346.5	0	0.223706	0.302337	-0.302337	0	0.151725	0.198087	-0.198087	0	0.219125	0.276596	-0.276596	0	0.233951	0.273599	-0.273599
10.3565	10356.5	0	0.223502	0.289346	-0.289346	1	0.151587	0.190411	0.809589	0	0.218914	0.267038	-0.267038	0	0.233726	0.266926	-0.266926
10.3665	10366.5	0	0.223298	0.277322	-0.277322	0	0.15145	0.183304	-0.183304	0	0.218702	0.258188	-0.258188	0	0.233501	0.260741	-0.260741
10.3765	10376.5	1	0.223095	0.266526	0.733474	0	0.151313	0.176922	-0.176922	0	0.218491	0.250234	-0.250234	0	0.233276	0.255175	-0.255175
10.3865	10386.5	0	0.222891	0.257102	-0.257102	0	0.151176	0.171348	-0.171348	0	0.21828	0.243284	-0.243284	0	0.233051	0.250301	-0.250301
10.3965	10396.5	0	0.222687	0.249092	-0.249092	0	0.151039	0.166608	-0.166608	0	0.218069	0.237368	-0.237368	1	0.232826	0.24614	0.753861
10.4065	10406.5	1	0.222484	0.242452	0.757548	0	0.150903	0.162676	-0.162676	0	0.217858	0.232452	-0.232452	1	0.232601	0.242669	0.757331
10.4165	10416.5	0	0.22228	0.237076	-0.237076	0	0.150766	0.15949	-0.15949	0	0.217647	0.228461	-0.228461	0	0.232376	0.239837	-0.239837
10.4265	10426.5	0	0.222077	0.232819	-0.232819	0	0.150629	0.156963	-0.156963	1	0.217436	0.225287	0.774713	0	0.232152	0.237568	-0.237568
10.4365	10436.5	0	0.221874	0.229515	-0.229515	0	0.150493	0.154998	-0.154998	2	0.217225	0.222811	1.77719	0	0.231927	0.23578	-0.23578
10.4465	10446.5	0	0.221671	0.226997	-0.226997	0	0.150356	0.153497	-0.153497	0	0.217015	0.220908	-0.220908	1	0.231703	0.234388	0.765612
10.4565	10456.5	1	0.221468	0.225105	0.774895	0	0.15022	0.152364	-0.152364	1	0.216804	0.219463	0.780537	2	0.231479	0.233313	1.76669
10.4665	10466.5	0	0.221265	0.223699	-0.223699	0	0.150083	0.151518	-0.151518	0	0.216594	0.218373	-0.218373	1	0.231254	0.232482	0.767518
10.4765	10476.5	0	0.221062	0.222658	-0.222658	0	0.149947	0.150888	-0.150888	0	0.216384	0.21755	-0.21755	0	0.23103	0.231835	-0.231835
10.4865	10486.5	0	0.220859	0.221884	-0.221884	0	0.14981	0.150415	-0.150415	2	0.216173	0.216923	1.78308	1	0.230806	0.231323	0.768677
10.4965	10496.5	0	0.220656	0.221302	-0.221302	0	0.149674	0.150055	-0.150055	0	0.215963	0.216435	-0.216435	0	0.230583	0.230908	-0.230908
10.5065	10506.5	0	0.220454	0.220852	-0.220852	0	0.149538	0.149773	-0.149773	0	0.215753	0.216044	-0.216044	1	0.230359	0.23056	0.76944
10.5165	10516.5	0	0.220251	0.220492	-0.220492	0	0.149402	0.149544	-0.149544	1	0.215543	0.215719	0.784281	0	0.230135	0.230257	-0.230257
10.5265	10526.5	1	0.220049	0.220191	0.779809	0	0.149266	0.14935	-0.14935	1	0.215334	0.215438	0.784562	1	0.229912	0.229984	0.770016
10.5365	10536.5	0	0.219847	0.219929	-0.219929	0	0.14913	0.149178	-0.149178	1	0.215124	0.215184	0.784816	0	0.229688	0.22973	-0.22973
10.5465	10546.5	0	0.219644	0.219644	-0.219644	0	0.148994	0.148994	-0.148994	1	0.214914	0.214914	0.785086	1	0.229465	0.229465	0.770535
10.5565	10556.5	0	0.219442	0.219442	-0.219442	0	0.148858	0.148858	-0.148858	0	0.214705	0.214705	-0.214705	1	0.229242	0.229242	0.770758
10.5665	10566.5	0	0.21924	0.21924	-0.21924	0	0.148722	0.148722	-0.148722	0	0.214496	0.214496	-0.214496	0	0.229019	0.229019	-0.229019
10.5765	10576.5	0	0.219038	0.219038	-0.219038	0	0.148586	0.148586	-0.148586	1	0.214286	0.214286	0.785714	0	0.228796	0.228796	-0.228796
10.5865	10586.5	0	0.218836	0.218836	-0.218836	0	0.148451	0.148451	-0.148451	0	0.214077	0.214077	-0.214077	0	0.228573	0.228573	-0.228573
10.5965	10596.5	0	0.218635	0.218635	-0.218635	0	0.148315	0.148315	-0.148315	1	0.213868	0.213868	0.786132	0	0.22835	0.22835	-0.22835
10.6065	10606.5	1	0.218433	0.218433	0.781567	0	0.148179	0.148179	-0.148179	0	0.213659	0.213659	-0.213659	0	0.228127	0.228127	-0.228127
10.6165	10616.5	0	0.218231	0.218231	-0.218231	0	0.148044	0.148044	-0.148044	0	0.21345	0.21345	-0.21345	0	0.227905	0.227905	-0.227905
10.6265	10626.5	1	0.21803	0.21803	0.78197	0	0.147909	0.147909	-0.147909	1	0.213241	0.213241	0.786759	0	0.227682	0.227682	-0.227682
10.6365	10636.5	0	0.217829	0.217829	-0.217829	0	0.147773	0.147773	-0.147773	0	0.213033	0.213033	-0.213033	1	0.22746	0.22746	0.77254
10.6465	10646.5	1	0.217627	0.217627	0.782373	0	0.147638	0.147638	-0.147638	0	0.212824	0.212824	-0.212824	0	0.227238	0.227238	-0.227238
10.6565	10656.5	0	0.217426	0.217426	-0.217426	0	0.147503	0.147503	-0.147503	0	0.212615	0.212615	-0.212615	0	0.227015	0.227015	-0.227015
10.6665	10666.5	0	0.217225	0.217225	-0.217225	0	0.147367	0.147367	-0.147367	0	0.212407	0.212407	-0.212407	1	0.226793	0.226793	0.773207
10.6765	10676.5	0	0.217024	0.217024	-0.217024	0	0.147232	0.147232	-0.147232	0	0.212199	0.212199	-0.212199	0	0.226571	0.226571	-0.226571
10.6865	10686.5	0	0.216823	0.216823	-0.216823	0	0.147097	0.147097	-0.147097	1	0.21199	0.21199	0.78801	0	0.22635	0.22635	-0.22635
10.6965	10696.5	0	0.216622	0.216622	-0.216622	0	0.146962	0.146962	-0.146962	0	0.211782	0.211782	-0.211782	1	0.226128	0.226128	0.773872
10.7065	10706.5	0	0.216421	0.216421	-0.216421	0	0.146827	0.146827	-0.146827	0	0.211574	0.211574	-0.211574	0	0.225906	0.225906	-0.225906
10.7165	10716.5	0	0.216221	0.216221	-0.216221	0	0.146692	0.146692	-0.146692	0	0.211366	0.211366	-0.211366	0	0.225685	0.225685	-0.225685
10.7265	10726.5	0	0.21602	0.21602	-0.21602	0	0.146558	0.146558	-0.146558	0	0.211159	0.211159	-0.211159	0	0.225463	0.225463	-0.225463
10.7365	10736.5	0	0.21582	0.21582	-0.21582	0	0.146423	0.146423	-0.146423	0	0.210951	0.210951	-0.210951	0	0.225242	0.225242	-0.225242
10.7465	10746.5	0	0.215619	0.215619	-0.215619	0	0.146288	0.146288	-0.146288	0	0.210743	0.210743	-0.210743	0	0.225021	0.225021	-0.225021
10.7565	10756.5	0	0.215419	0.215419	-0.215419	0	0.146153	0.146153	-0.146153	0	0.210536	0.210536	-0.210536	0	0.2248	0.2248	-0.2248
10.7665	10766.5	1	0.215219	0.215219	0.784781	0	0.146019	0.146019	-0.146019	0	0.210328	0.210328	-0.210328	0	0.224579	0.224579	-0.224579
10.7765	10776.5	0	0.215019	0.215019	-0.215019	0	0.145884	0.145884	-0.145884	0	0.210121	0.210121	-0.210121	0	0.224358	0.224358	-0.224358
10.7865	10786.5	0	0.214819	0.214819	-0.214819	0	0.14575	0.14575	-0.14575	0	0.209914	0.209914	-0.209914	0	0.224137	0.224137	-0.224137
10.7965	10796.5	0	0.214619	0.214619	-0.214619	0	0.145616	0.145616	-0.145616	0	0.209707	0.209707	-0.209707	0	0.223916	0.223916	-0.223916
10.8065	10806.5	0	0.214419	0.214419	-0.214419	0	0.145481	0.145481	-0.145481	0	0.2095	0.2095	-0.2095	0	0.223696	0.223696	-0.223696
10.8165	10816.5	0	0.214219	0.214219	-0.214219	1	0.145347	0.145347	0.854653	1	0.209293	0.209293	0.790707	0	0.223475	0.223475	-0.223475
10.8265	10826.5	0	0.21402	0.21402	-0.21402	0	0.145213	0.145213	-0.145213	0	0.209086	0.209086	-0.209086	1	0.223255	0.223255	0.776745
10.8365	10836.5	0	0.21382	0.21382	-0.21382	0	0.145079	0.145079	-0.145079	0	0.208879	0.208879	-0.208879	0	0.223034	0.223034	-0.223034
10.8465	10846.5	0	0.213621	0.213621	-0.213621	0	0.144945	0.144945	-0.144945	0	0.208673	0.208673	-0.208673	0	0.222814	0.222814	-0.222814
10.8565	10856.5	0	0.213421	0.213421	-0.213421	0	0.144811	0.144811	-0.144811	1	0.208466	0.208466	0.791534	0	0.222594	0.222594	-0.222594
10.8665	10866.5	0	0.213222	0.213222	-0.213222	0	0.144677	0.144677	-0.144677	0	0.20826	0.20826	-0.20826	0	0.222374	0.222374	-0.222374
10.8765	10876.5	0	0.213023	0.213023	-0.213023	0	0.144543	0.144543	-0.144543	0	0.208053	0.208053	-0.208053	1	0.222155	0.222155	0.777845
10.8865	10886.5	1	0.212824	0.212824	0.787176	0	0.144409	0.144409	-0.144409	0	0.207847	0.207847	-0.207847	1	0.221935	0.221935	0.778065
10.8965	10896.5	1	0.212625	0.212625	0.787375	0	0.144275	0.144275	-0.144275	0	0.207641	0.207641	-0.207641	1	0.221715	0.221715	0.778285
10.9065	10906.5	1	0.212426	0.212426	0.787574	0	0.144142	0.144142	-0.144142	0	0.207435	0.207435	-0.207435	0	0.221496	0.221496	-0.221496
10.9165	10916.5	0	0.212227	0.212227	-0.212227	1	0.144008	0.144008	0.855992	0	0.207229	0.207229	-0.207229	0	0.221276	0.221276	-0.221276
10.9265	10926.5	0	0.212029	0.212029	-0.212029	0	0.143874	0.143874	-0.143874	0	0.207023	0.207023	-0.207023	1	0.221057	0.221057	0.778943
10.9365	10936.5	0	0.21183	0.21183	-0.21183	0	0.143741	0.143741	-0.143741	0	0.206817	0.206817	-0.206817	0	0.220838	0.220838	-0.220838
10.9465	10946.5	0	0.211631	0.211631	-0.211631	0	0.143607	0.143607	-0.143607	0	0.206612	0.206612	-0.206612	0	0.220618	0.220618	-0.220618
10.9565	10956.5	1	0.211433	0.211433	0.788567	0	0.143474	0.143474	-0.143474	1	0.206406	0.206406	0.793594	0	0.220399	0.220399	-0.220399
10.9665	10966.5	0	0.211235	0.211235	-0.211235	0	0.143341	0.143341	-0.143341	2	0.206201	0.206201	1.7938	1	0.220181	0.220181	0.779819
10.9765	10976.5	1	0.211036	0.211036	0.788964	0	0.143207	0.143207	-0.143207	0	0.205995	0.205995	-0.205995	0	0.219962	0.219962	-0.219962
10.9865	10986.5	2	0.210838	0.210838	1.78916	0	0.143074	0.143074	-0.143074	0	0.20579	0.20579	-0.20579	0	0.219743	0.219743	-0.219743
10.9965	10996.5	0	0.21064	0.21064	-0.21064	0	0.142941	0.142941	-0.142941	0	0.205585	0.205585	-0.205585	0	0.219525	0.219525	-0.219525
11.0065	11006.5	1	0.210442	0.210442	0.789558	0	0.142808	0.142808	-0.142808	1	0.20538	0.20538	0.79462	1	0.219306	0.219306	0.780694
11.0165	11016.5	0	0.210244	0.210244	-0.210244	0	0.142675	0.142675	-0.142675	0	0.205175	0.205175	-0.205175	1	0.219088	0.219088	0.780912
11.0265	11026.5	0	0.210046	0.210046	-0.210046	1	0.142542	0.142542	0.857458	0	0.20497	0.20497	-0.20497	0	0.218869	0.218869	-0.218869
11.0365	11036.5	0	0.209849	0.209849	-0.209849	1	0.142409	0.142409	0.857591	0	0.204765	0.204765	-0.204765	0	0.218651	0.218651	-0.218651
11.0465	11046.5	1	0.209651	0.209651	0.790349	0	0.142276	0.142276	-0.142276	0	0.204561	0.204561	-0.204561	0	0.218433	0.218433	-0.218433
11.0565	11056.5	0	0.209454	0.209454	-0.209454	0	0.142144	0.142144	-0.142144	0	0.204356	0.204356	-0.204356	0	0.218215	0.218215	-0.218215
11.0665	11066.5	0	0.209256	0.209256	-0.209256	0	0.142011	0.142011	-0.142011	0	0.204152	0.204152	-0.204152	0	0.217997	0.217997	-0.217997
11.0765	11076.5	0	0.209059	0.209059	-0.209059	1	0.141878	0.141878	0.858122	0	0.203948	0.203948	-0.203948	0	0.21778	0.21778	-0.21778
11.0865	11086.5	0	0.208862	0.208862	-0.208862	0	0.141746	0.141746	-0.141746	0	0.203743	0.203743	-0.203743	1	0.217562	0.217562	0.782438
11.0965	11096.5	0	0.208665	0.208665	-0.208665	0	0.141613	0.141613	-0.141613	0	0.203539	0.203539	-0.203539	0	0.217344	0.217344	-0.217344
11.1065	11106.5	0	0.208468	0.208468	-0.208468	0	0.141481	0.141481	-0.141481	2	0.203335	0.203335	1.79666	0	0.217127	0.217127	-0.217127
11.1165	11116.5	0	0.208271	0.208271	-0.208271	0	0.141348	0.141348	-0.141348	0	0.203131	0.203131	-0.203131	1	0.21691	0.21691	0.78309
11.1265	11126.5	0	0.208074	0.208074	-0.208074	0	0.141216	0.141216	-0.141216	0	0.202927	0.202927	-0.202927	0	0.216692	0.216692	-0.216692
11.1365	11136.5	0	0.207877	0.207877	-0.207877	0	0.141084	0.141084	-0.141084	1	0.202724	0.202724	0.797276	0	0.216475	0.216475	-0.216475
11.1465	11146.5	0	0.20768	0.20768	-0.20768	1	0.140952	0.140952	0.859048	0	0.20252	0.20252	-0.20252	0	0.216258	0.216258	-0.216258
11.1565	11156.5	0	0.207484	0.207484	-0.207484	0	0.140819	0.140819	-0.140819	0	0.202316	0.202316	-0.202316	0	0.216041	0.216041	-0.216041
11.1665	11166.5	0	0.207287	0.207287	-0.207287	0	0.140687	0.140687	-0.140687	0	0.202113	0.202113	-0.202113	0	0.215825	0.215825	-0.215825
11.1765	11176.5	1	0.207091	0.207091	0.792909	0	0.140555	0.140555	-0.140555	1	0.20191	0.20191	0.798091	0	0.215608	0.215608	-0.215608
11.1865	11186.5	0	0.206895	0.206895	-0.206895	0	0.140423	0.140423	-0.140423	1	0.201706	0.201706	0.798294	0	0.215391	0.215391	-0.215391
11.1965	11196.5	0	0.206698	0.206698	-0.206698	0	0.140292	0.140292	-0.140292	0	0.201503	0.201503	-0.201503	0	0.215175	0.215175	-0.215175
11.2065	11206.5	2	0.206502	0.206502	1.7935	0	0.14016	0.14016	-0.14016	0	0.2013	0.2013	-0.2013	0	0.214958	0.214958	-0.214958
11.2165	11216.5	0	0.206306	0.206306	-0.206306	0	0.140028	0.140028	-0.140028	0	0.201097	0.201097	-0.201097	0	0.214742	0.214742	-0.214742
11.2265	11226.5	0	0.20611	0.20611	-0.20611	1	0.139896	0.139896	0.860104	0	0.200894	0.200894	-0.200894	1	0.214526	0.214526	0.785474
11.2365	11236.5	0	0.205914	0.205914	-0.205914	0	0.139765	0.139765	-0.139765	1	0.200692	0.200692	0.799308	0	0.21431	0.21431	-0.21431
11.2465	11246.5	0	0.205719	0.205719	-0.205719	0	0.139633	0.139633	-0.139633	0	0.200489	0.200489	-0.200489	1	0.214094	0.214094	0.785906
11.2565	11256.5	0	0.205523	0.205523	-0.205523	0	0.139502	0.139502	-0.139502	0	0.200286	0.200286	-0.200286	2	0.213878	0.213878	1.78612
11.2665	11266.5	0	0.205327	0.205327	-0.205327	0	0.13937	0.13937	-0.13937	0	0.200084	0.200084	-0.200084	0	0.213662	0.213662	-0.213662
11.2765	11276.5	0	0.205132	0.205132	-0.205132	1	0.139239	0.139239	0.860761	0	0.199881	0.199881	-0.199881	1	0.213447	0.213447	0.786553
11.2865	11286.5	0	0.204936	0.204936	-0.204936	0	0.139107	0.139107	-0.139107	0	0.199679	0.199679	-0.199679	0	0.213231	0.213231	-0.213231
11.2965	11296.5	0	0.204741	0.204741	-0.204741	0	0.138976	0.138976	-0.138976	1	0.199477	0.199477	0.800523	0	0.213016	0.213016	-0.213016
11.3065	11306.5	1	0.204546	0.204546	0.795454	0	0.138845	0.138845	-0.138845	0	0.199275	0.199275	-0.199275	0	0.2128	0.2128	-0.2128
11.3165	11316.5	1	0.204351	0.204351	0.795649	0	0.138714	0.138714	-0.138714	1	0.199073	0.199073	0.800927	0	0.212585	0.212585	-0.212585
11.3265	11326.5	0	0.204156	0.204156	-0.204156	0	0.138583	0.138583	-0.138583	0	0.198871	0.198871	-0.198871	1	0.21237	0.21237	0.78763
11.3365	11336.5	0	0.203961	0.203961	-0.203961	0	0.138452	0.138452	-0.138452	0	0.198669	0.198669	-0.198669	1	0.212155	0.212155	0.787845
11.3465	11346.5	0	0.203766	0.203766	-0.203766	0	0.138321	0.138321	-0.138321	0	0.198468	0.198468	-0.198468	0	0.21194	0.21194	-0.21194
11.3565	11356.5	0	0.203571	0.203571	-0.203571	0	0.13819	0.13819	-0.13819	0	0.198266	0.198266	-0.198266	0	0.211725	0.211725	-0.211725
11.3665	11366.5	1	0.203377	0.203377	0.796623	0	0.138059	0.138059	-0.138059	0	0.198065	0.198065	-0.198065	2	0.211511	0.211511	1.78849
11.3765	11376.5	0	0.203182	0.203182	-0.203182	1	0.137928	0.137928	0.862072	0	0.197863	0.197863	-0.197863	0	0.211296	0.211296	-0.211296
11.3865	11386.5	1	0.202988	0.202988	0.797012	0	0.137798	0.137798	-0.137798	1	0.197662	0.197662	0.802338	0	0.211082	0.211082	-0.211082
11.3965	11396.5	0	0.202793	0.202793	-0.202793	0	0.137667	0.137667	-0.137667	0	0.197461	0.197461	-0.197461	0	0.210867	0.210867	-0.210867
11.4065	11406.5	0	0.202599	0.202599	-0.202599	0	0.137536	0.137536	-0.137536	0	0.19726	0.19726	-0.19726	0	0.210653	0.210653	-0.210653
11.4165	11416.5	0	0.202405	0.202405	-0.202405	0	0.137406	0.137406	-0.137406	1	0.197059	0.197059	0.802941	0	0.210439	0.210439	-0.210439
11.4265	11426.5	1	0.202211	0.202211	0.797789	1	0.137275	0.137275	0.862725	0	0.196858	0.196858	-0.196858	0	0.210225	0.210225	-0.210225
11.4365	11436.5	1	0.202017	0.202017	0.797983	0	0.137145	0.137145	-0.137145	0	0.196657	0.196657	-0.196657	0	0.210011	0.210011	-0.210011
11.4465	11446.5	0	0.201823	0.201823	-0.201823	0	0.137015	0.137015	-0.137015	0	0.196457	0.196457	-0.196457	0	0.209797	0.209797	-0.209797
11.4565	11456.5	0	0.201629	0.201629	-0.201629	0	0.136884	0.136884	-0.136884	0	0.196256	0.196256	-0.196256	0	0.209583	0.209583	-0.209583
11.4665	11466.5	1	0.201435	0.201435	0.798565	0	0.136754	0.136754	-0.136754	0	0.196056	0.196056	-0.196056	0	0.209369	0.209369	-0.209369
11.4765	11476.5	1	0.201242	0.201242	0.798758	0	0.136624	0.136624	-0.136624	1	0.195855	0.195855	0.804145	0	0.209156	0.209156	-0.209156
11.4865	11486.5	1	0.201048	0.201048	0.798952	0	0.136494	0.136494	-0.136494	0	0.195655	0.195655	-0.195655	0	0.208943	0.208943	-0.208943
11.4965	11496.5	1	0.200855	0.200855	0.799145	0	0.136364	0.136364	-0.136364	0	0.195455	0.195455	-0.195455	0	0.208729	0.208729	-0.208729
11.5065	11506.5	0	0.200661	0.200661	-0.200661	0	0.136234	0.136234	-0.136234	0	0.195255	0.195255	-0.195255	1	0.208516	0.208516	0.791484
11.5165	11516.5	0	0.200468	0.200468	-0.200468	0	0.136104	0.136104	-0.136104	1	0.195055	0.195055	0.804945	1	0.208303	0.208303	0.791697
11.5265	11526.5	0	0.200275	0.200275	-0.200275	0	0.135974	0.135974	-0.135974	0	0.194855	0.194855	-0.194855	0	0.20809	0.20809	-0.20809
11.5365	11536.5	0	0.200082	0.200082	-0.200082	0	0.135845	0.135845	-0.135845	0	0.194655	0.194655	-0.194655	1	0.207877	0.207877	0.792123
11.5465	11546.5	0	0.199889	0.199889	-0.199889	0	0.135715	0.135715	-0.135715	0	0.194455	0.194455	-0.194455	0	0.207664	0.207664	-0.207664
11.5565	11556.5	0	0.199696	0.199696	-0.199696	1	0.135585	0.135585	0.864415	0	0.194256	0.194256	-0.194256	1	0.207451	0.207451	0.792549
11.5665	11566.5	0	0.199503	0.199503	-0.199503	0	0.135456	0.135456	-0.135456	1	0.194056	0.194056	0.805944	0	0.207239	0.207239	-0.207239
11.5765	11576.5	1	0.19931	0.19931	0.80069	0	0.135326	0.135326	-0.135326	0	0.193857	0.193857	-0.193857	0	0.207026	0.207026	-0.207026
11.5865	11586.5	0	0.199118	0.199118	-0.199118	0	0.135197	0.135197	-0.135197	0	0.193658	0.193658	-0.193658	1	0.206814	0.206814	0.793186
11.5965	11596.5	0	0.198925	0.198925	-0.198925	0	0.135067	0.135067	-0.135067	1	0.193458	0.193458	0.806542	0	0.206602	0.206602	-0.206602
11.6065	11606.5	1	0.198733	0.198733	0.801267	0	0.134938	0.134938	-0.134938	0	0.193259	0.193259	-0.193259	0	0.206389	0.206389	-0.206389
11.6165	11616.5	0	0.19854	0.19854	-0.19854	0	0.134809	0.134809	-0.134809	0	0.19306	0.19306	-0.19306	0	0.206177	0.206177	-0.206177
11.6265	11626.5	0	0.198348	0.198348	-0.198348	0	0.13468	0.13468	-0.13468	0	0.192861	0.192861	-0.192861	0	0.205965	0.205965	-0.205965
11.6365	11636.5	0	0.198156	0.198156	-0.198156	0	0.13455	0.13455	-0.13455	0	0.192663	0.192663	-0.192663	0	0.205753	0.205753	-0.205753
11.6465	11646.5	0	0.197964	0.197964	-0.197964	0	0.134421	0.134421	-0.134421	0	0.192464	0.192464	-0.192464	0	0.205542	0.205542	-0.205542
11.6565	11656.5	0	0.197772	0.197772	-0.197772	0	0.134292	0.134292	-0.134292	0	0.192265	0.192265	-0.192265	0	0.20533	0.20533	-0.20533
11.6665	11666.5	0	0.19758	0.19758	-0.19758	0	0.134163	0.134163	-0.134163	0	0.192067	0.192067	-0.192067	0	0.205119	0.205119	-0.205119
11.6765	11676.5	1	0.197388	0.197388	0.802612	0	0.134035	0.134035	-0.134035	0	0.191868	0.191868	-0.191868	0	0.204907	0.204907	-0.204907
11.6865	11686.5	0	0.197197	0.197197	-0.197197	0	0.133906	0.133906	-0.133906	0	0.19167	0.19167	-0.19167	0	0.204696	0.204696	-0.204696
11.6965	11696.5	0	0.197005	0.197005	-0.197005	0	0.133777	0.133777	-0.133777	0	0.191472	0.191472	-0.191472	0	0.204485	0.204485	-0.204485
11.7065	11706.5	0	0.196814	0.196814	-0.196814	1	0.133648	0.133648	0.866352	0	0.191274	0.191274	-0.191274	0	0.204273	0.204273	-0.204273
11.7165	11716.5	0	0.196622	0.196622	-0.196622	0	0.13352	0.13352	-0.13352	0	0.191076	0.191076	-0.191076	1	0.204062	0.204062	0.795938
11.7265	11726.5	1	0.196431	0.196431	0.803569	1	0.133391	0.133391	0.866609	0	0.190878	0.190878	-0.190878	0	0.203851	0.203851	-0.203851
11.7365	11736.5	1	0.19624	0.19624	0.80376	0	0.133263	0.133263	-0.133263	0	0.19068	0.19068	-0.19068	0	0.203641	0.203641	-0.203641
11.7465	11746.5	0	0.196048	0.196048	-0.196048	0	0.133134	0.133134	-0.133134	0	0.190483	0.190483	-0.190483	0	0.20343	0.20343	-0.20343
11.7565	11756.5	0	0.195857	0.195857	-0.195857	0	0.133006	0.133006	-0.133006	0	0.190285	0.190285	-0.190285	1	0.203219	0.203219	0.796781
11.7665	11766.5	0	0.195666	0.195666	-0.195666	0	0.132877	0.132877	-0.132877	1	0.190087	0.190087	0.809913	0	0.203009	0.203009	-0.203009
11.7765	11776.5	0	0.195475	0.195475	-0.195475	0	0.132749	0.132749	-0.132749	0	0.18989	0.18989	-0.18989	0	0.202798	0.202798	-0.202798
11.7865	11786.5	0	0.195285	0.195285	-0.195285	0	0.132621	0.132621	-0.132621	0	0.189693	0.189693	-0.189693	0	0.202588	0.202588	-0.202588
11.7965	11796.5	1	0.195094	0.195094	0.804906	0	0.132493	0.132493	-0.132493	1	0.189496	0.189496	0.810504	1	0.202378	0.202378	0.797622
11.8065	11806.5	0	0.194904	0.194904	-0.194904	0	0.132365	0.132365	-0.132365	1	0.189299	0.189299	0.810701	0	0.202168	0.202168	-0.202168
11.8165	11816.5	0	0.194713	0.194713	-0.194713	0	0.132237	0.132237	-0.132237	0	0.189101	0.189101	-0.189101	0	0.201958	0.201958	-0.201958
11.8265	11826.5	0	0.194523	0.194523	-0.194523	1	0.132109	0.132109	0.867891	0	0.188905	0.188905	-0.188905	0	0.201748	0.201748	-0.201748
11.8365	11836.5	0	0.194332	0.194332	-0.194332	0	0.131981	0.131981	-0.131981	0	0.188708	0.188708	-0.188708	0	0.201538	0.201538	-0.201538
11.8465	11846.5	1	0.194142	0.194142	0.805858	0	0.131853	0.131853	-0.131853	1	0.188511	0.188511	0.811489	0	0.201328	0.201328	-0.201328
11.8565	11856.5	0	0.193952	0.193952	-0.193952	0	0.131725	0.131725	-0.131725	0	0.188314	0.188314	-0.188314	0	0.201119	0.201119	-0.201119
11.8665	11866.5	0	0.193762	0.193762	-0.193762	0	0.131597	0.131597	-0.131597	0	0.188118	0.188118	-0.188118	1	0.20091	0.20091	0.79909
11.8765	11876.5	0	0.193572	0.193572	-0.193572	0	0.13147	0.13147	-0.13147	1	0.187921	0.187921	0.812079	0	0.2007	0.2007	-0.2007
11.8865	11886.5	0	0.193382	0.193382	-0.193382	0	0.131342	0.131342	-0.131342	0	0.187725	0.187725	-0.187725	0	0.200491	0.200491	-0.200491
11.8965	11896.5	0	0.193192	0.193192	-0.193192	0	0.131215	0.131215	-0.131215	0	0.187529	0.187529	-0.187529	1	0.200282	0.200282	0.799718
11.9065	11906.5	1	0.193003	0.193003	0.806997	0	0.131087	0.131087	-0.131087	0	0.187333	0.187333	-0.187333	0	0.200073	0.200073	-0.200073
11.9165	11916.5	0	0.192813	0.192813	-0.192813	1	0.13096	0.13096	0.86904	0	0.187137	0.187137	-0.187137	0	0.199864	0.199864	-0.199864
11.9265	11926.5	0	0.192624	0.192624	-0.192624	0	0.130832	0.130832	-0.130832	1	0.186941	0.186941	0.813059	0	0.199655	0.199655	-0.199655
11.9365	11936.5	0	0.192434	0.192434	-0.192434	0	0.130705	0.130705	-0.130705	0	0.186745	0.186745	-0.186745	0	0.199446	0.199446	-0.199446
11.9465	11946.5	0	0.192245	0.192245	-0.192245	0	0.130578	0.130578	-0.130578	0	0.18655	0.18655	-0.18655	0	0.199238	0.199238	-0.199238
11.9565	11956.5	0	0.192056	0.192056	-0.192056	0	0.130451	0.130451	-0.130451	0	0.186354	0.186354	-0.186354	0	0.199029	0.199029	-0.199029
11.9665	11966.5	0	0.191867	0.191867	-0.191867	0	0.130324	0.130324	-0.130324	0	0.186158	0.186158	-0.186158	0	0.198821	0.198821	-0.198821
11.9765	11976.5	0	0.191678	0.191678	-0.191678	0	0.130197	0.130197	-0.130197	0	0.185963	0.185963	-0.185963	0	0.198613	0.198613	-0.198613
11.9865	11986.5	0	0.191489	0.191489	-0.191489	0	0.13007	0.13007	-0.13007	0	0.185768	0.185768	-0.185768	0	0.198404	0.198404	-0.198404
11.9965	11996.5	0	0.1913	0.1913	-0.1913	0	0.129943	0.129943	-0.129943	0	0.185572	0.185572	-0.185572	0	0.198196	0.198196	-0.198196
12.0065	12006.5	0	0.191111	0.191111	-0.191111	1	0.129816	0.129816	0.870184	0	0.185377	0.185377	-0.185377	0	0.197988	0.197988	-0.197988
12.0165	12016.5	0	0.190922	0.190922	-0.190922	0	0.129689	0.129689	-0.129689	0	0.185182	0.185182	-0.185182	0	0.19778	0.19778	-0.19778
12.0265	12026.5	0	0.190734	0.190734	-0.190734	0	0.129563	0.129563	-0.129563	1	0.184987	0.184987	0.815013	0	0.197573	0.197573	-0.197573
12.0365	12036.5	0	0.190546	0.190546	-0.190546	0	0.129436	0.129436	-0.129436	0	0.184792	0.184792	-0.184792	0	0.197365	0.197365	-0.197365
12.0465	12046.5	0	0.190357	0.190357	-0.190357	0	0.129309	0.129309	-0.129309	0	0.184598	0.184598	-0.184598	0	0.197158	0.197158	-0.197158
12.0565	12056.5	0	0.190169	0.190169	-0.190169	0	0.129183	0.129183	-0.129183	0	0.184403	0.184403	-0.184403	0	0.19695	0.19695	-0.19695
12.0665	12066.5	0	0.189981	0.189981	-0.189981	0	0.129056	0.129056	-0.129056	1	0.184209	0.184209	0.815791	0	0.196743	0.196743	-0.196743
12.0765	12076.5	1	0.189793	0.189793	0.810207	0	0.12893	0.12893	-0.12893	0	0.184014	0.184014	-0.184014	0	0.196535	0.196535	-0.196535
12.0865	12086.5	0	0.189605	0.189605	-0.189605	0	0.128804	0.128804	-0.128804	0	0.18382	0.18382	-0.18382	0	0.196328	0.196328	-0.196328
12.0965	12096.5	0	0.189417	0.189417	-0.189417	0	0.128678	0.128678	-0.128678	1	0.183626	0.183626	0.816374	0	0.196121	0.196121	-0.196121
12.1065	12106.5	0	0.189229	0.189229	-0.189229	0	0.128551	0.128551	-0.128551	0	0.183431	0.183431	-0.183431	0	0.195914	0.195914	-0.195914
12.1165	12116.5	0	0.189041	0.189041	-0.189041	0	0.128425	0.128425	-0.128425	0	0.183237	0.183237	-0.183237	0	0.195708	0.195708	-0.195708
12.1265	12126.5	0	0.188853	0.188853	-0.188853	0	0.128299	0.128299	-0.128299	0	0.183044	0.183044	-0.183044	0	0.195501	0.195501	-0.195501
12.1365	12136.5	0	0.188666	0.188666	-0.188666	0	0.128173	0.128173	-0.128173	1	0.18285	0.18285	0.81715	0	0.195294	0.195294	-0.195294
12.1465	12146.5	0	0.188478	0.188478	-0.188478	0	0.128047	0.128047	-0.128047	0	0.182656	0.182656	-0.182656	0	0.195088	0.195088	-0.195088
12.1565	12156.5	0	0.188291	0.188291	-0.188291	0	0.127921	0.127921	-0.127921	0	0.182462	0.182462	-0.182462	0	0.194881	0.194881	-0.194881
12.1665	12166.5	1	0.188104	0.188104	0.811896	0	0.127795	0.127795	-0.127795	0	0.182269	0.182269	-0.182269	0	0.194675	0.194675	-0.194675
12.1765	12176.5	0	0.187917	0.187917	-0.187917	0	0.127669	0.127669	-0.127669	0	0.182076	0.182076	-0.182076	0	0.194469	0.194469	-0.194469
12.1865	12186.5	0	0.187729	0.187729	-0.187729	0	0.127544	0.127544	-0.127544	0	0.181882	0.181882	-0.181882	0	0.194263	0.194263	-0.194263
12.1965	12196.5	0	0.187543	0.187543	-0.187543	0	0.127418	0.127418	-0.127418	0	0.181689	0.181689	-0.181689	0	0.194057	0.194057	-0.194057
12.2065	12206.5	0	0.187356	0.187356	-0.187356	3	0.127293	0.127293	2.87271	0	0.181496	0.181496	-0.181496	0	0.193851	0.193851	-0.193851
12.2165	12216.5	1	0.187169	0.187169	0.812831	0	0.127167	0.127167	-0.127167	0	0.181303	0.181303	-0.181303	0	0.193645	0.193645	-0.193645
12.2265	12226.5	0	0.186982	0.186982	-0.186982	0	0.127042	0.127042	-0.127042	0	0.18111	0.18111	-0.18111	0	0.193439	0.193439	-0.193439
12.2365	12236.5	1	0.186796	0.186796	0.813204	0	0.126916	0.126916	-0.126916	0	0.180917	0.180917	-0.180917	1	0.193234	0.193234	0.806766
12.2465	12246.5	1	0.186609	0.186609	0.813391	1	0.126791	0.126791	0.873209	0	0.180724	0.180724	-0.180724	0	0.193028	0.193028	-0.193028
12.2565	12256.5	0	0.186423	0.186423	-0.186423	0	0.126666	0.126666	-0.126666	0	0.180532	0.180532	-0.180532	1	0.192823	0.192823	0.807177
12.2665	12266.5	0	0.186236	0.186236	-0.186236	0	0.12654	0.12654	-0.12654	0	0.180339	0.180339	-0.180339	0	0.192618	0.192618	-0.192618
12.2765	12276.5	1	0.18605	0.18605	0.81395	0	0.126415	0.126415	-0.126415	0	0.180147	0.180147	-0.180147	0	0.192413	0.192413	-0.192413
12.2865	12286.5	0	0.185864	0.185864	-0.185864	0	0.12629	0.12629	-0.12629	1	0.179954	0.179954	0.820046	0	0.192208	0.192208	-0.192208
12.2965	12296.5	2	0.185678	0.185678	1.81432	0	0.126165	0.126165	-0.126165	0	0.179762	0.179762	-0.179762	0	0.192003	0.192003	-0.192003
12.3065	12306.5	0	0.185492	0.185492	-0.185492	0	0.12604	0.12604	-0.12604	0	0.17957	0.17957	-0.17957	0	0.191798	0.191798	-0.191798
12.3165	12316.5	0	0.185306	0.185306	-0.185306	0	0.125915	0.125915	-0.125915	0	0.179378	0.179378	-0.179378	0	0.191593	0.191593	-0.191593
12.3265	12326.5	0	0.18512	0.18512	-0.18512	0	0.12579	0.12579	-0.12579	0	0.179186	0.179186	-0.179186	0	0.191388	0.191388	-0.191388
12.3365	12336.5	0	0.184934	0.184934	-0.184934	0	0.125666	0.125666	-0.125666	0	0.178994	0.178994	-0.178994	0	0.191184	0.191184	-0.191184
12.3465	12346.5	0	0.184749	0.184749	-0.184749	0	0.125541	0.125541	-0.125541	0	0.178802	0.178802	-0.178802	0	0.19098	0.19098	-0.19098
12.3565	12356.5	0	0.184563	0.184563	-0.184563	0	0.125416	0.125416	-0.125416	0	0.178611	0.178611	-0.178611	0	0.190775	0.190775	-0.190775
12.3665	12366.5	1	0.184378	0.184378	0.815622	0	0.125292	0.125292	-0.125292	0	0.178419	0.178419	-0.178419	0	0.190571	0.190571	-0.190571
12.3765	12376.5	1	0.184193	0.184193	0.815808	0	0.125167	0.125167	-0.125167	0	0.178228	0.178228	-0.178228	0	0.190367	0.190367	-0.190367
12.3865	12386.5	0	0.184007	0.184007	-0.184007	0	0.125043	0.125043	-0.125043	0	0.178036	0.178036	-0.178036	0	0.190163	0.190163	-0.190163
12.3965	12396.5	0	0.183822	0.183822	-0.183822	0	0.124918	0.124918	-0.124918	0	0.177845	0.177845	-0.177845	0	0.189959	0.189959	-0.189959
12.4065	12406.5	0	0.183637	0.183637	-0.183637	0	0.124794	0.124794	-0.124794	1	0.177654	0.177654	0.822346	0	0.189755	0.189755	-0.189755
12.4165	12416.5	0	0.183452	0.183452	-0.183452	1	0.12467	0.12467	0.87533	1	0.177463	0.177463	0.822537	0	0.189552	0.189552	-0.189552
12.4265	12426.5	0	0.183267	0.183267	-0.183267	0	0.124546	0.124546	-0.124546	0	0.177272	0.177272	-0.177272	0	0.189348	0.189348	-0.189348
12.4365	12436.5	0	0.183083	0.183083	-0.183083	0	0.124421	0.124421	-0.124421	0	0.177081	0.177081	-0.177081	2	0.189145	0.189145	1.81086
12.4465	12446.5	0	0.182898	0.182898	-0.182898	0	0.124297	0.124297	-0.124297	0	0.17689	0.17689	-0.17689	0	0.188941	0.188941	-0.188941
12.4565	12456.5	0	0.182713	0.182713	-0.182713	1	0.124173	0.124173	0.875827	0	0.1767	0.1767	-0.1767	1	0.188738	0.188738	0.811262
12.4665	12466.5	0	0.182529	0.182529	-0.182529	0	0.124049	0.124049	-0.124049	0	0.176509	0.176509	-0.176509	1	0.188535	0.188535	0.811465
12.4765	12476.5	0	0.182344	0.182344	-0.182344	0	0.123925	0.123925	-0.123925	1	0.176319	0.176319	0.823681	0	0.188332	0.188332	-0.188332
12.4865	12486.5	0	0.18216	0.18216	-0.18216	0	0.123802	0.123802	-0.123802	0	0.176128	0.176128	-0.176128	0	0.188129	0.188129	-0.188129
12.4965	12496.5	0	0.181976	0.181976	-0.181976	1	0.123678	0.123678	0.876322	0	0.175938	0.175938	-0.175938	0	0.187926	0.187926	-0.187926
12.5065	12506.5	0	0.181792	0.181792	-0.181792	0	0.123554	0.123554	-0.123554	0	0.175748	0.175748	-0.175748	0	0.187723	0.187723	-0.187723
12.5165	12516.5	0	0.181608	0.181608	-0.181608	0	0.12343	0.12343	-0.12343	0	0.175558	0.175558	-0.175558	0	0.187521	0.187521	-0.187521
12.5265	12526.5	0	0.181424	0.181424	-0.181424	0	0.123307	0.123307	-0.123307	0	0.175368	0.175368	-0.175368	0	0.187318	0.187318	-0.187318
12.5365	12536.5	0	0.18124	0.18124	-0.18124	1	0.123183	0.123183	0.876817	0	0.175178	0.175178	-0.175178	1	0.187116	0.187116	0.812884
12.5465	12546.5	1	0.181056	0.181056	0.818944	0	0.12306	0.12306	-0.12306	0	0.174988	0.174988	-0.174988	0	0.186914	0.186914	-0.186914
12.5565	12556.5	0	0.180872	0.180872	-0.180872	1	0.122937	0.122937	0.877063	0	0.174798	0.174798	-0.174798	0	0.186711	0.186711	-0.186711
12.5665	12566.5	0	0.180689	0.180689	-0.180689	0	0.122813	0.122813	-0.122813	0	0.174609	0.174609	-0.174609	0	0.186509	0.186509	-0.186509
12.5765	12576.5	1	0.180505	0.180505	0.819495	0	0.12269	0.12269	-0.12269	0	0.17442	0.17442	-0.17442	1	0.186307	0.186307	0.813693
12.5865	12586.5	0	0.180322	0.180322	-0.180322	0	0.122567	0.122567	-0.122567	1	0.17423	0.17423	0.82577	0	0.186105	0.186105	-0.186105
12.5965	12596.5	0	0.180139	0.180139	-0.180139	0	0.122444	0.122444	-0.122444	0	0.174041	0.174041	-0.174041	0	0.185904	0.185904	-0.185904
12.6065	12606.5	0	0.179955	0.179955	-0.179955	0	0.12232	0.12232	-0.12232	1	0.173852	0.173852	0.826148	0	0.185702	0.185702	-0.185702
12.6165	12616.5	0	0.179772	0.179772	-0.179772	0	0.122197	0.122197	-0.122197	0	0.173663	0.173663	-0.173663	0	0.1855	0.1855	-0.1855
12.6265	12626.5	0	0.179589	0.179589	-0.179589	0	0.122075	0.122075	-0.122075	0	0.173474	0.173474	-0.173474	0	0.185299	0.185299	-0.185299
12.6365	12636.5	0	0.179406	0.179406	-0.179406	0	0.121952	0.121952	-0.121952	1	0.173285	0.173285	0.826715	0	0.185097	0.185097	-0.185097
12.6465	12646.5	0	0.179224	0.179224	-0.179224	0	0.121829	0.121829	-0.121829	0	0.173096	0.173096	-0.173096	0	0.184896	0.184896	-0.184896
12.6565	12656.5	0	0.179041	0.179041	-0.179041	0	0.121706	0.121706	-0.121706	0	0.172907	0.172907	-0.172907	0	0.184695	0.184695	-0.184695
12.6665	12666.5	0	0.178858	0.178858	-0.178858	0	0.121583	0.121583	-0.121583	0	0.172719	0.172719	-0.172719	2	0.184494	0.184494	1.81551
12.6765	12676.5	0	0.178676	0.178676	-0.178676	0	0.121461	0.121461	-0.121461	0	0.17253	0.17253	-0.17253	1	0.184293	0.184293	0.815707
12.6865	12686.5	0	0.178493	0.178493	-0.178493	0	0.121338	0.121338	-0.121338	1	0.172342	0.172342	0.827658	0	0.184092	0.184092	-0.184092
12.6965	12696.5	1	0.178311	0.178311	0.821689	0	0.121216	0.121216	-0.121216	0	0.172154	0.172154	-0.172154	0	0.183892	0.183892	-0.183892
12.7065	12706.5	0	0.178128	0.178128	-0.178128	0	0.121093	0.121093	-0.121093	1	0.171965	0.171965	0.828035	0	0.183691	0.183691	-0.183691
12.7165	12716.5	0	0.177946	0.177946	-0.177946	0	0.120971	0.120971	-0.120971	0	0.171777	0.171777	-0.171777	0	0.18349	0.18349	-0.18349
12.7265	12726.5	0	0.177764	0.177764	-0.177764	0	0.120848	0.120848	-0.120848	0	0.171589	0.171589	-0.171589	0	0.18329	0.18329	-0.18329
12.7365	12736.5	0	0.177582	0.177582	-0.177582	0	0.120726	0.120726	-0.120726	0	0.171402	0.171402	-0.171402	0	0.18309	0.18309	-0.18309
12.7465	12746.5	0	0.1774	0.1774	-0.1774	0	0.120604	0.120604	-0.120604	1	0.171214	0.171214	0.828786	0	0.18289	0.18289	-0.18289
12.7565	12756.5	0	0.177218	0.177218	-0.177218	0	0.120482	0.120482	-0.120482	1	0.171026	0.171026	0.828974	0	0.182689	0.182689	-0.182689
12.7665	12766.5	0	0.177037	0.177037	-0.177037	0	0.12036	0.12036	-0.12036	0	0.170839	0.170839	-0.170839	0	0.182489	0.182489	-0.182489
12.7765	12776.5	0	0.176855	0.176855	-0.176855	0	0.120238	0.120238	-0.120238	0	0.170651	0.170651	-0.170651	1	0.182289	0.182289	0.817711
12.7865	12786.5	1	0.176674	0.176674	0.823326	0	0.120116	0.120116	-0.120116	0	0.170464	0.170464	-0.170464	0	0.18209	0.18209	-0.18209
12.7965	12796.5	1	0.176492	0.176492	0.823508	1	0.119994	0.119994	0.880006	1	0.170276	0.170276	0.829724	0	0.18189	0.18189	-0.18189
12.8065	12806.5	0	0.176311	0.176311	-0.176311	2	0.119872	0.119872	1.88013	0	0.170089	0.170089	-0.170089	0	0.181691	0.181691	-0.181691
12.8165	12816.5	1	0.176129	0.176129	0.82387	0	0.11975	0.11975	-0.11975	0	0.169902	0.169902	-0.169902	0	0.181491	0.181491	-0.181491
12.8265	12826.5	0	0.175948	0.175948	-0.175948	0	0.119628	0.119628	-0.119628	0	0.169715	0.169715	-0.169715	0	0.181292	0.181292	-0.181292
12.8365	12836.5	0	0.175767	0.175767	-0.175767	0	0.119507	0.119507	-0.119507	1	0.169528	0.169528	0.830472	0	0.181092	0.181092	-0.181092
12.8465	12846.5	0	0.175586	0.175586	-0.175586	0	0.119385	0.119385	-0.119385	1	0.169341	0.169341	0.830659	0	0.180893	0.180893	-0.180893
12.8565	12856.5	0	0.175405	0.175405	-0.175405	0	0.119264	0.119264	-0.119264	0	0.169155	0.169155	-0.169155	0	0.180694	0.180694	-0.180694
12.8665	12866.5	0	0.175225	0.175225	-0.175225	0	0.119142	0.119142	-0.119142	0	0.168968	0.168968	-0.168968	0	0.180495	0.180495	-0.180495
12.8765	12876.5	0	0.175044	0.175044	-0.175044	1	0.119021	0.119021	0.880979	0	0.168782	0.168782	-0.168782	0	0.180296	0.180296	-0.180296
12.8865	12886.5	0	0.174863	0.174863	-0.174863	0	0.118899	0.118899	-0.118899	0	0.168595	0.168595	-0.168595	0	0.180098	0.180098	-0.180098
12.8965	12896.5	0	0.174683	0.174683	-0.174683	0	0.118778	0.118778	-0.118778	0	0.168409	0.168409	-0.168409	0	0.179899	0.179899	-0.179899
12.9065	12906.5	0	0.174502	0.174502	-0.174502	0	0.118657	0.118657	-0.118657	0	0.168223	0.168223	-0.168223	2	0.179701	0.179701	1.8203
12.9165	12916.5	0	0.174322	0.174322	-0.174322	0	0.118536	0.118536	-0.118536	1	0.168037	0.168037	0.831963	1	0.179502	0.179502	0.820498
12.9265	12926.5	1	0.174142	0.174142	0.825859	0	0.118415	0.118415	-0.118415	0	0.167851	0.167851	-0.167851	0	0.179304	0.179304	-0.179304
12.9365	12936.5	0	0.173961	0.173961	-0.173961	0	0.118294	0.118294	-0.118294	0	0.167665	0.167665	-0.167665	0	0.179106	0.179106	-0.179106
12.9465	12946.5	0	0.173781	0.173781	-0.173781	0	0.118173	0.118173	-0.118173	0	0.167479	0.167479	-0.167479	0	0.178907	0.178907	-0.178907
12.9565	12956.5	0	0.173601	0.173601	-0.173601	0	0.118052	0.118052	-0.118052	0	0.167293	0.167293	-0.167293	0	0.178709	0.178709	-0.178709
12.9665	12966.5	0	0.173422	0.173422	-0.173422	0	0.117931	0.117931	-0.117931	1	0.167108	0.167108	0.832892	0	0.178512	0.178512	-0.178512
12.9765	12976.5	0	0.173242	0.173242	-0.173242	0	0.11781	0.11781	-0.11781	0	0.166922	0.166922	-0.166922	0	0.178314	0.178314	-0.178314
12.9865	12986.5	1	0.173062	0.173062	0.826938	0	0.117689	0.117689	-0.117689	0	0.166737	0.166737	-0.166737	0	0.178116	0.178116	-0.178116
12.9965	12996.5	0	0.172882	0.172882	-0.172882	0	0.117569	0.117569	-0.117569	1	0.166552	0.166552	0.833448	0	0.177919	0.177919	-0.177919
13.0065	13006.5	0	0.172703	0.172703	-0.172703	0	0.117448	0.117448	-0.117448	0	0.166366	0.166366	-0.166366	0	0.177721	0.177721	-0.177721
13.0165	13016.5	0	0.172523	0.172523	-0.172523	0	0.117328	0.117328	-0.117328	0	0.166181	0.166181	-0.166181	0	0.177524	0.177524	-0.177524
13.0265	13026.5	0	0.172344	0.172344	-0.172344	0	0.117207	0.117207	-0.117207	0	0.165996	0.165996	-0.165996	0	0.177326	0.177326	-0.177326
13.0365	13036.5	0	0.172165	0.172165	-0.172165	0	0.117087	0.117087	-0.117087	0	0.165811	0.165811	-0.165811	0	0.177129	0.177129	-0.177129
13.0465	13046.5	1	0.171986	0.171986	0.828014	0	0.116966	0.116966	-0.116966	0	0.165627	0.165627	-0.165627	0	0.176932	0.176932	-0.176932
13.0565	13056.5	0	0.171807	0.171807	-0.171807	0	0.116846	0.116846	-0.116846	3	0.165442	0.165442	2.83456	0	0.176735	0.176735	-0.176735
13.0665	13066.5	1	0.171628	0.171628	0.828372	0	0.116726	0.116726	-0.116726	0	0.165257	0.165257	-0.165257	0	0.176538	0.176538	-0.176538
13.0765	13076.5	0	0.171449	0.171449	-0.171449	0	0.116606	0.116606	-0.116606	0	0.165073	0.165073	-0.165073	0	0.176342	0.176342	-0.176342
13.0865	13086.5	0	0.17127	0.17127	-0.17127	0	0.116486	0.116486	-0.116486	0	0.164888	0.164888	-0.164888	0	0.176145	0.176145	-0.176145
13.0965	13096.5	0	0.171091	0.171091	-0.171091	0	0.116366	0.116366	-0.116366	0	0.164704	0.164704	-0.164704	1	0.175949	0.175949	0.824052
13.1065	13106.5	0	0.170913	0.170913	-0.170913	0	0.116246	0.116246	-0.116246	0	0.16452	0.16452	-0.16452	0	0.175752	0.175752	-0.175752
13.1165	13116.5	1	0.170734	0.170734	0.829266	0	0.116126	0.116126	-0.116126	0	0.164336	0.164336	-0.164336	0	0.175556	0.175556	-0.175556
13.1265	13126.5	0	0.170556	0.170556	-0.170556	0	0.116006	0.116006	-0.116006	1	0.164152	0.164152	0.835848	1	0.17536	0.17536	0.82464
13.1365	13136.5	0	0.170378	0.170378	-0.170378	1	0.115886	0.115886	0.884114	0	0.163968	0.163968	-0.163968	0	0.175163	0.175163	-0.175163
13.1465	13146.5	0	0.170199	0.170199	-0.170199	0	0.115766	0.115766	-0.115766	1	0.163784	0.163784	0.836216	0	0.174967	0.174967	-0.174967
13.1565	13156.5	0	0.170021	0.170021	-0.170021	0	0.115647	0.115647	-0.115647	0	0.1636	0.1636	-0.1636	0	0.174772	0.174772	-0.174772
13.1665	13166.5	0	0.169843	0.169843	-0.169843	0	0.115527	0.115527	-0.115527	0	0.163417	0.163417	-0.163417	0	0.174576	0.174576	-0.174576
13.1765	13176.5	0	0.169665	0.169665	-0.169665	0	0.115408	0.115408	-0.115408	0	0.163233	0.163233	-0.163233	1	0.17438	0.17438	0.82562
13.1865	13186.5	0	0.169487	0.169487	-0.169487	1	0.115288	0.115288	0.884712	0	0.16305	0.16305	-0.16305	0	0.174184	0.174184	-0.174184
13.1965	13196.5	0	0.16931	0.16931	-0.16931	0	0.115169	0.115169	-0.115169	0	0.162866	0.162866	-0.162866	0	0.173989	0.173989	-0.173989
13.2065	13206.5	0	0.169132	0.169132	-0.169132	0	0.115049	0.115049	-0.115049	0	0.162683	0.162683	-0.162683	0	0.173794	0.173794	-0.173794
13.2165	13216.5	0	0.168954	0.168954	-0.168954	1	0.11493	0.11493	0.88507	0	0.1625	0.1625	-0.1625	0	0.173598	0.173598	-0.173598
13.2265	13226.5	0	0.168777	0.168777	-0.168777	0	0.114811	0.114811	-0.114811	0	0.162317	0.162317	-0.162317	0	0.173403	0.173403	-0.173403
13.2365	13236.5	0	0.1686	0.1686	-0.1686	0	0.114692	0.114692	-0.114692	1	0.162134	0.162134	0.837866	0	0.173208	0.173208	-0.173208
13.2465	13246.5	0	0.168422	0.168422	-0.168422	0	0.114573	0.114573	-0.114573	0	0.161951	0.161951	-0.161951	0	0.173013	0.173013	-0.173013
13.2565	13256.5	0	0.168245	0.168245	-0.168245	0	0.114454	0.114454	-0.114454	0	0.161769	0.161769	-0.161769	0	0.172818	0.172818	-0.172818
13.2665	13266.5	0	0.168068	0.168068	-0.168068	0	0.114335	0.114335	-0.114335	0	0.161586	0.161586	-0.161586	0	0.172624	0.172624	-0.172624
13.2765	13276.5	0	0.167891	0.167891	-0.167891	0	0.114216	0.114216	-0.114216	0	0.161404	0.161404	-0.161404	0	0.172429	0.172429	-0.172429
13.2865	13286.5	1	0.167714	0.167714	0.832286	0	0.114097	0.114097	-0.114097	0	0.161221	0.161221	-0.161221	0	0.172235	0.172235	-0.172235
13.2965	13296.5	1	0.167537	0.167537	0.832463	0	0.113978	0.113978	-0.113978	1	0.161039	0.161039	0.838961	0	0.17204	0.17204	-0.17204
13.3065	13306.5	0	0.16736	0.16736	-0.16736	0	0.11386	0.11386	-0.11386	0	0.160857	0.160857	-0.160857	0	0.171846	0.171846	-0.171846
13.3165	13316.5	0	0.167184	0.167184	-0.167184	0	0.113741	0.113741	-0.113741	1	0.160674	0.160674	0.839326	1	0.171652	0.171652	0.828349
13.3265	13326.5	0	0.167007	0.167007	-0.167007	0	0.113622	0.113622	-0.113622	0	0.160492	0.160492	-0.160492	0	0.171457	0.171457	-0.171457
13.3365	13336.5	0	0.166831	0.166831	-0.166831	0	0.113504	0.113504	-0.113504	0	0.16031	0.16031	-0.16031	0	0.171263	0.171263	-0.171263
13.3465	13346.5	0	0.166654	0.166654	-0.166654	1	0.113385	0.113385	0.886615	0	0.160129	0.160129	-0.160129	0	0.17107	0.17107	-0.17107
13.3565	13356.5	0	0.166478	0.166478	-0.166478	0	0.113267	0.113267	-0.113267	0	0.159947	0.159947	-0.159947	0	0.170876	0.170876	-0.170876
13.3665	13366.5	0	0.166302	0.166302	-0.166302	0	0.113148	0.113148	-0.113148	0	0.159765	0.159765	-0.159765	0	0.170682	0.170682	-0.170682
13.3765	13376.5	0	0.166126	0.166126	-0.166126	0	0.11303	0.11303	-0.11303	0	0.159584	0.159584	-0.159584	0	0.170488	0.170488	-0.170488
13.3865	13386.5	0	0.16595	0.16595	-0.16595	0	0.112912	0.112912	-0.112912	0	0.159402	0.159402	-0.159402	0	0.170295	0.170295	-0.170295
13.3965	13396.5	1	0.165774	0.165774	0.834226	0	0.112794	0.112794	-0.112794	0	0.159221	0.159221	-0.159221	1	0.170102	0.170102	0.829898
13.4065	13406.5	1	0.165598	0.165598	0.834402	0	0.112676	0.112676	-0.112676	1	0.15904	0.15904	0.84096	0	0.169908	0.169908	-0.169908
13.4165	13416.5	0	0.165422	0.165422	-0.165422	0	0.112558	0.112558	-0.112558	0	0.158859	0.158859	-0.158859	2	0.169715	0.169715	1.83028
13.4265	13426.5	0	0.165246	0.165246	-0.165246	0	0.11244	0.11244	-0.11244	0	0.158677	0.158677	-0.158677	0	0.169522	0.169522	-0.169522
13.4365	13436.5	0	0.165071	0.165071	-0.165071	0	0.112322	0.112322	-0.112322	0	0.158497	0.158497	-0.158497	1	0.169329	0.169329	0.830671
13.4465	13446.5	0	0.164896	0.164896	-0.164896	0	0.112204	0.112204	-0.112204	0	0.158316	0.158316	-0.158316	0	0.169136	0.169136	-0.169136
13.4565	13456.5	0	0.16472	0.16472	-0.16472	0	0.112086	0.112086	-0.112086	0	0.158135	0.158135	-0.158135	0	0.168943	0.168943	-0.168943
13.4665	13466.5	0	0.164545	0.164545	-0.164545	1	0.111968	0.111968	0.888032	0	0.157954	0.157954	-0.157954	1	0.168751	0.168751	0.831249
13.4765	13476.5	0	0.16437	0.16437	-0.16437	0	0.111851	0.111851	-0.111851	0	0.157774	0.157774	-0.157774	0	0.168558	0.168558	-0.168558
13.4865	13486.5	0	0.164195	0.164195	-0.164195	0	0.111733	0.111733	-0.111733	0	0.157593	0.157593	-0.157593	0	0.168366	0.168366	-0.168366
13.4965	13496.5	0	0.16402	0.16402	-0.16402	1	0.111616	0.111616	0.888384	0	0.157413	0.157413	-0.157413	1	0.168174	0.168174	0.831826
13.5065	13506.5	0	0.163845	0.163845	-0.163845	0	0.111498	0.111498	-0.111498	0	0.157233	0.157233	-0.157233	0	0.167981	0.167981	-0.167981
13.5165	13516.5	0	0.16367	0.16367	-0.16367	0	0.111381	0.111381	-0.111381	0	0.157053	0.157053	-0.157053	0	0.167789	0.167789	-0.167789
13.5265	13526.5	1	0.163495	0.163495	0.836505	0	0.111263	0.111263	-0.111263	0	0.156873	0.156873	-0.156873	0	0.167597	0.167597	-0.167597
13.5365	13536.5	0	0.163321	0.163321	-0.163321	0	0.111146	0.111146	-0.111146	0	0.156693	0.156693	-0.156693	0	0.167405	0.167405	-0.167405
13.5465	13546.5	0	0.163146	0.163146	-0.163146	0	0.111029	0.111029	-0.111029	0	0.156513	0.156513	-0.156513	1	0.167213	0.167213	0.832786
13.5565	13556.5	0	0.162972	0.162972	-0.162972	0	0.110912	0.110912	-0.110912	0	0.156333	0.156333	-0.156333	0	0.167022	0.167022	-0.167022
13.5665	13566.5	0	0.162797	0.162797	-0.162797	0	0.110795	0.110795	-0.110795	0	0.156154	0.156154	-0.156154	0	0.16683	0.16683	-0.16683
13.5765	13576.5	1	0.162623	0.162623	0.837377	0	0.110678	0.110678	-0.110678	0	0.155974	0.155974	-0.155974	0	0.166639	0.166639	-0.166639
13.5865	13586.5	1	0.162449	0.162449	0.837551	0	0.110561	0.110561	-0.110561	0	0.155795	0.155795	-0.155795	0	0.166447	0.166447	-0.166447
13.5965	13596.5	0	0.162275	0.162275	-0.162275	0	0.110444	0.110444	-0.110444	0	0.155615	0.155615	-0.155615	0	0.166256	0.166256	-0.166256
13.6065	13606.5	0	0.162101	0.162101	-0.162101	0	0.110327	0.110327	-0.110327	0	0.155436	0.155436	-0.155436	0	0.166065	0.166065	-0.166065
13.6165	13616.5	0	0.161927	0.161927	-0.161927	1	0.11021	0.11021	0.88979	0	0.155257	0.155257	-0.155257	0	0.165874	0.165874	-0.165874
13.6265	13626.5	1	0.161753	0.161753	0.838247	0	0.110093	0.110093	-0.110093	0	0.155078	0.155078	-0.155078	0	0.165683	0.165683	-0.165683
13.6365	13636.5	0	0.161579	0.161579	-0.161579	0	0.109977	0.109977	-0.109977	1	0.154899	0.154899	0.845101	0	0.165492	0.165492	-0.165492
13.6465	13646.5	0	0.161406	0.161406	-0.161406	0	0.10986	0.10986	-0.10986	0	0.15472	0.15472	-0.15472	0	0.165301	0.165301	-0.165301
13.6565	13656.5	0	0.161232	0.161232	-0.161232	0	0.109744	0.109744	-0.109744	0	0.154541	0.154541	-0.154541	0	0.165111	0.165111	-0.165111
13.6665	13666.5	0	0.161059	0.161059	-0.161059	0	0.109627	0.109627	-0.109627	0	0.154363	0.154363	-0.154363	0	0.16492	0.16492	-0.16492
13.6765	13676.5	0	0.160886	0.160886	-0.160886	0	0.109511	0.109511	-0.109511	1	0.154184	0.154184	0.845816	0	0.16473	0.16473	-0.16473
13.6865	13686.5	0	0.160712	0.160712	-0.160712	0	0.109394	0.109394	-0.109394	0	0.154005	0.154005	-0.154005	0	0.164539	0.164539	-0.164539
13.6965	13696.5	0	0.160539	0.160539	-0.160539	1	0.109278	0.109278	0.890722	0	0.153827	0.153827	-0.153827	1	0.164349	0.164349	0.835651
13.7065	13706.5	0	0.160366	0.160366	-0.160366	1	0.109162	0.109162	0.890838	0	0.153649	0.153649	-0.153649	0	0.164159	0.164159	-0.164159
13.7165	13716.5	0	0.160193	0.160193	-0.160193	1	0.109046	0.109046	0.890954	0	0.153471	0.153471	-0.153471	1	0.163969	0.163969	0.836031
13.7265	13726.5	0	0.16002	0.16002	-0.16002	0	0.10893	0.10893	-0.10893	0	0.153293	0.153293	-0.153293	0	0.163779	0.163779	-0.163779
13.7365	13736.5	0	0.159848	0.159848	-0.159848	0	0.108814	0.108814	-0.108814	0	0.153115	0.153115	-0.153115	0	0.163589	0.163589	-0.163589
13.7465	13746.5	0	0.159675	0.159675	-0.159675	0	0.108698	0.108698	-0.108698	0	0.152937	0.152937	-0.152937	0	0.1634	0.1634	-0.1634
13.7565	13756.5	0	0.159502	0.159502	-0.159502	1	0.108582	0.108582	0.891418	0	0.152759	0.152759	-0.152759	0	0.16321	0.16321	-0.16321
13.7665	13766.5	0	0.15933	0.15933	-0.15933	0	0.108466	0.108466	-0.108466	0	0.152581	0.152581	-0.152581	0	0.163021	0.163021	-0.163021
13.7765	13776.5	0	0.159157	0.159157	-0.159157	0	0.10835	0.10835	-0.10835	0	0.152404	0.152404	-0.152404	0	0.162831	0.162831	-0.162831
13.7865	13786.5	0	0.158985	0.158985	-0.158985	0	0.108234	0.108234	-0.108234	0	0.152226	0.152226	-0.152226	0	0.162642	0.162642	-0.162642
13.7965	13796.5	1	0.158813	0.158813	0.841187	0	0.108119	0.108119	-0.108119	0	0.152049	0.152049	-0.152049	0	0.162453	0.162453	-0.162453
13.8065	13806.5	0	0.158641	0.158641	-0.158641	0	0.108003	0.108003	-0.108003	0	0.151872	0.151872	-0.151872	0	0.162264	0.162264	-0.162264
13.8165	13816.5	1	0.158469	0.158469	0.841531	0	0.107887	0.107887	-0.107887	0	0.151695	0.151695	-0.151695	0	0.162075	0.162075	-0.162075
13.8265	13826.5	1	0.158297	0.158297	0.841703	0	0.107772	0.107772	-0.107772	0	0.151517	0.151517	-0.151517	0	0.161886	0.161886	-0.161886
13.8365	13836.5	0	0.158125	0.158125	-0.158125	0	0.107657	0.107657	-0.107657	0	0.151341	0.151341	-0.151341	0	0.161697	0.161697	-0.161697
13.8465	13846.5	0	0.157953	0.157953	-0.157953	0	0.107541	0.107541	-0.107541	0	0.151164	0.151164	-0.151164	0	0.161508	0.161508	-0.161508
13.8565	13856.5	0	0.157781	0.157781	-0.157781	0	0.107426	0.107426	-0.107426	1	0.150987	0.150987	0.849013	0	0.16132	0.16132	-0.16132
13.8665	13866.5	0	0.15761	0.15761	-0.15761	0	0.107311	0.107311	-0.107311	0	0.15081	0.15081	-0.15081	0	0.161131	0.161131	-0.161131
13.8765	13876.5	0	0.157438	0.157438	-0.157438	0	0.107196	0.107196	-0.107196	0	0.150634	0.150634	-0.150634	0	0.160943	0.160943	-0.160943
13.8865	13886.5	1	0.157267	0.157267	0.842733	0	0.10708	0.10708	-0.10708	0	0.150457	0.150457	-0.150457	0	0.160755	0.160755	-0.160755
13.8965	13896.5	0	0.157096	0.157096	-0.157096	0	0.106966	0.106966	-0.106966	0	0.150281	0.150281	-0.150281	0	0.160567	0.160567	-0.160567
13.9065	13906.5	0	0.156924	0.156924	-0.156924	0	0.106851	0.106851	-0.106851	0	0.150105	0.150105	-0.150105	0	0.160379	0.160379	-0.160379
13.9165	13916.5	0	0.156753	0.156753	-0.156753	0	0.106736	0.106736	-0.106736	0	0.149928	0.149928	-0.149928	0	0.160191	0.160191	-0.160191
13.9265	13926.5	0	0.156582	0.156582	-0.156582	0	0.106621	0.106621	-0.106621	0	0.149752	0.149752	-0.149752	0	0.160003	0.160003	-0.160003
13.9365	13936.5	1	0.156411	0.156411	0.843589	0	0.106506	0.106506	-0.106506	0	0.149576	0.149576	-0.149576	0	0.159815	0.159815	-0.159815
13.9465	13946.5	0	0.156241	0.156241	-0.156241	0	0.106391	0.106391	-0.106391	0	0.1494	0.1494	-0.1494	0	0.159628	0.159628	-0.159628
13.9565	13956.5	1	0.15607	0.15607	0.84393	0	0.106276	0.106276	-0.106276	0	0.149225	0.149225	-0.149225	0	0.15944	0.15944	-0.15944
13.9665	13966.5	0	0.155899	0.155899	-0.155899	0	0.106162	0.106162	-0.106162	0	0.149049	0.149049	-0.149049	0	0.159253	0.159253	-0.159253
13.9765	13976.5	0	0.155728	0.155728	-0.155728	0	0.106047	0.106047	-0.106047	0	0.148873	0.148873	-0.148873	1	0.159065	0.159065	0.840935
13.9865	13986.5	1	0.155558	0.155558	0.844442	1	0.105933	0.105933	0.894067	0	0.148698	0.148698	-0.148698	1	0.158878	0.158878	0.841122
13.9965	13996.5	0	0.155388	0.155388	-0.155388	0	0.105818	0.105818	-0.105818	0	0.148523	0.148523	-0.148523	0	0.158691	0.158691	-0.158691
14.0065	14006.5	0	0.155217	0.155217	-0.155217	0	0.105704	0.105704	-0.105704	0	0.148347	0.148347	-0.148347	0	0.158504	0.158504	-0.158504
14.0165	14016.5	0	0.155047	0.155047	-0.155047	0	0.10559	0.10559	-0.10559	0	0.148172	0.148172	-0.148172	1	0.158317	0.158317	0.841683
14.0265	14026.5	0	0.154877	0.154877	-0.154877	0	0.105476	0.105476	-0.105476	0	0.147997	0.147997	-0.147997	0	0.158131	0.158131	-0.158131
14.0365	14036.5	0	0.154707	0.154707	-0.154707	0	0.105361	0.105361	-0.105361	1	0.147822	0.147822	0.852178	1	0.157944	0.157944	0.842056
14.0465	14046.5	0	0.154537	0.154537	-0.154537	0	0.105247	0.105247	-0.105247	0	0.147647	0.147647	-0.147647	0	0.157757	0.157757	-0.157757
14.0565	14056.5	0	0.154367	0.154367	-0.154367	0	0.105133	0.105133	-0.105133	0	0.147472	0.147472	-0.147472	0	0.157571	0.157571	-0.157571
14.0665	14066.5	0	0.154198	0.154198	-0.154198	0	0.105019	0.105019	-0.105019	0	0.147298	0.147298	-0.147298	0	0.157385	0.157385	-0.157385
14.0765	14076.5	0	0.154028	0.154028	-0.154028	1	0.104905	0.104905	0.895095	0	0.147123	0.147123	-0.147123	0	0.157198	0.157198	-0.157198
14.0865	14086.5	0	0.153858	0.153858	-0.153858	0	0.104792	0.104792	-0.104792	0	0.146949	0.146949	-0.146949	1	0.157012	0.157012	0.842988
14.0965	14096.5	0	0.153689	0.153689	-0.153689	0	0.104678	0.104678	-0.104678	0	0.146774	0.146774	-0.146774	0	0.156826	0.156826	-0.156826
14.1065	14106.5	0	0.15352	0.15352	-0.15352	0	0.104564	0.104564	-0.104564	0	0.1466	0.1466	-0.1466	1	0.15664	0.15664	0.84336
14.1165	14116.5	0	0.15335	0.15335	-0.15335	0	0.10445	0.10445	-0.10445	0	0.146426	0.146426	-0.146426	0	0.156454	0.156454	-0.156454
14.1265	14126.5	1	0.153181	0.153181	0.846819	0	0.104337	0.104337	-0.104337	0	0.146252	0.146252	-0.146252	0	0.156269	0.156269	-0.156269
14.1365	14136.5	0	0.153012	0.153012	-0.153012	0	0.104223	0.104223	-0.104223	0	0.146078	0.146078	-0.146078	0	0.156083	0.156083	-0.156083
14.1465	14146.5	0	0.152843	0.152843	-0.152843	0	0.10411	0.10411	-0.10411	0	0.145904	0.145904	-0.145904	0	0.155898	0.155898	-0.155898
14.1565	14156.5	0	0.152674	0.152674	-0.152674	0	0.103996	0.103996	-0.103996	0	0.14573	0.14573	-0.14573	0	0.155712	0.155712	-0.155712
14.1665	14166.5	0	0.152505	0.152505	-0.152505	0	0.103883	0.103883	-0.103883	0	0.145556	0.145556	-0.145556	0	0.155527	0.155527	-0.155527
14.1765	14176.5	0	0.152337	0.152337	-0.152337	0	0.10377	0.10377	-0.10377	0	0.145383	0.145383	-0.145383	0	0.155342	0.155342	-0.155342
14.1865	14186.5	0	0.152168	0.152168	-0.152168	1	0.103656	0.103656	0.896343	0	0.145209	0.145209	-0.145209	0	0.155157	0.155157	-0.155157
14.1965	14196.5	0	0.151999	0.151999	-0.151999	0	0.103543	0.103543	-0.103543	0	0.145036	0.145036	-0.145036	0	0.154972	0.154972	-0.154972
14.2065	14206.5	0	0.151831	0.151831	-0.151831	0	0.10343	0.10343	-0.10343	0	0.144863	0.144863	-0.144863	0	0.154787	0.154787	-0.154787
14.2165	14216.5	0	0.151663	0.151663	-0.151663	0	0.103317	0.103317	-0.103317	1	0.144689	0.144689	0.855311	1	0.154602	0.154602	0.845398
14.2265	14226.5	0	0.151494	0.151494	-0.151494	0	0.103204	0.103204	-0.103204	0	0.144516	0.144516	-0.144516	0	0.154418	0.154418	-0.154418
14.2365	14236.5	0	0.151326	0.151326	-0.151326	1	0.103091	0.103091	0.896909	0	0.144343	0.144343	-0.144343	1	0.154233	0.154233	0.845767
14.2465	14246.5	0	0.151158	0.151158	-0.151158	0	0.102978	0.102978	-0.102978	0	0.14417	0.14417	-0.14417	0	0.154049	0.154049	-0.154049
14.2565	14256.5	0	0.15099	0.15099	-0.15099	0	0.102866	0.102866	-0.102866	0	0.143998	0.143998	-0.143998	0	0.153864	0.153864	-0.153864
14.2665	14266.5	0	0.150822	0.150822	-0.150822	0	0.102753	0.102753	-0.102753	0	0.143825	0.143825	-0.143825	0	0.15368	0.15368	-0.15368
14.2765	14276.5	0	0.150654	0.150654	-0.150654	0	0.10264	0.10264	-0.10264	0	0.143652	0.143652	-0.143652	0	0.153496	0.153496	-0.153496
14.2865	14286.5	0	0.150487	0.150487	-0.150487	0	0.102528	0.102528	-0.102528	1	0.14348	0.14348	0.85652	0	0.153312	0.153312	-0.153312
14.2965	14296.5	0	0.150319	0.150319	-0.150319	0	0.102415	0.102415	-0.102415	0	0.143307	0.143307	-0.143307	0	0.153128	0.153128	-0.153128
14.3065	14306.5	0	0.150152	0.150152	-0.150152	0	0.102303	0.102303	-0.102303	1	0.143135	0.143135	0.856865	0	0.152944	0.152944	-0.152944
14.3165	14316.5	0	0.149984	0.149984	-0.149984	0	0.10219	0.10219	-0.10219	0	0.142963	0.142963	-0.142963	0	0.15276	0.15276	-0.15276
14.3265	14326.5	0	0.149817	0.149817	-0.149817	0	0.102078	0.102078	-0.102078	0	0.142791	0.142791	-0.142791	0	0.152577	0.152577	-0.152577
14.3365	14336.5	0	0.14965	0.14965	-0.14965	0	0.101966	0.101966	-0.101966	0	0.142619	0.142619	-0.142619	1	0.152393	0.152393	0.847607
14.3465	14346.5	0	0.149482	0.149482	-0.149482	0	0.101853	0.101853	-0.101853	0	0.142447	0.142447	-0.142447	0	0.15221	0.15221	-0.15221
14.3565	14356.5	0	0.149315	0.149315	-0.149315	0	0.101741	0.101741	-0.101741	0	0.142275	0.142275	-0.142275	0	0.152027	0.152027	-0.152027
14.3665	14366.5	0	0.149148	0.149148	-0.149148	1	0.101629	0.101629	0.898371	0	0.142103	0.142103	-0.142103	0	0.151843	0.151843	-0.151843
14.3765	14376.5	0	0.148982	0.148982	-0.148982	0	0.101517	0.101517	-0.101517	0	0.141932	0.141932	-0.141932	0	0.15166	0.15166	-0.15166
14.3865	14386.5	0	0.148815	0.148815	-0.148815	0	0.101405	0.101405	-0.101405	0	0.14176	0.14176	-0.14176	1	0.151477	0.151477	0.848523
14.3965	14396.5	0	0.148648	0.148648	-0.148648	0	0.101293	0.101293	-0.101293	0	0.141589	0.141589	-0.141589	2	0.151294	0.151294	1.84871
14.4065	14406.5	0	0.148481	0.148481	-0.148481	1	0.101181	0.101181	0.898819	1	0.141417	0.141417	0.858583	0	0.151112	0.151112	-0.151112
14.4165	14416.5	0	0.148315	0.148315	-0.148315	0	0.10107	0.10107	-0.10107	0	0.141246	0.141246	-0.141246	0	0.150929	0.150929	-0.150929
14.4265	14426.5	0	0.148149	0.148149	-0.148149	0	0.100958	0.100958	-0.100958	0	0.141075	0.141075	-0.141075	0	0.150747	0.150747	-0.150747
14.4365	14436.5	0	0.147982	0.147982	-0.147982	0	0.100846	0.100846	-0.100846	0	0.140904	0.140904	-0.140904	0	0.150564	0.150564	-0.150564
14.4465	14446.5	0	0.147816	0.147816	-0.147816	0	0.100734	0.100734	-0.100734	0	0.140733	0.140733	-0.140733	0	0.150382	0.150382	-0.150382
14.4565	14456.5	0	0.14765	0.14765	-0.14765	0	0.100623	0.100623	-0.100623	0	0.140562	0.140562	-0.140562	0	0.150199	0.150199	-0.150199
14.4665	14466.5	0	0.147484	0.147484	-0.147484	0	0.100511	0.100511	-0.100511	0	0.140392	0.140392	-0.140392	0	0.150017	0.150017	-0.150017
14.4765	14476.5	0	0.147318	0.147318	-0.147318	0	0.1004	0.1004	-0.1004	0	0.140221	0.140221	-0.140221	1	0.149835	0.149835	0.850165
14.4865	14486.5	0	0.147152	0.147152	-0.147152	1	0.100289	0.100289	0.899711	0	0.14005	0.14005	-0.14005	0	0.149653	0.149653	-0.149653
14.4965	14496.5	0	0.146986	0.146986	-0.146986	0	0.100177	0.100177	-0.100177	0	0.13988	0.13988	-0.13988	0	0.149472	0.149472	-0.149472
14.5065	14506.5	0	0.146821	0.146821	-0.146821	0	0.100066	0.100066	-0.100066	0	0.13971	0.13971	-0.13971	0	0.14929	0.14929	-0.14929
14.5165	14516.5	0	0.146655	0.146655	-0.146655	1	0.0999549	0.0999549	0.900045	0	0.139539	0.139539	-0.139539	0	0.149108	0.149108	-0.149108
14.5265	14526.5	0	0.14649	0.14649	-0.14649	0	0.0998438	0.0998438	-0.0998438	0	0.139369	0.139369	-0.139369	0	0.148927	0.148927	-0.148927
14.5365	14536.5	0	0.146324	0.146324	-0.146324	1	0.0997328	0.0997328	0.900267	1	0.139199	0.139199	0.860801	0	0.148745	0.148745	-0.148745
14.5465	14546.5	0	0.146159	0.146159	-0.146159	1	0.0996218	0.0996218	0.900378	0	0.139029	0.139029	-0.139029	0	0.148564	0.148564	-0.148564
14.5565	14556.5	0	0.145994	0.145994	-0.145994	0	0.0995109	0.0995109	-0.0995109	0	0.138859	0.138859	-0.138859	0	0.148383	0.148383	-0.148383
14.5665	14566.5	0	0.145828	0.145828	-0.145828	0	0.0994	0.0994	-0.0994	0	0.13869	0.13869	-0.13869	0	0.148202	0.148202	-0.148202
14.5765	14576.5	1	0.145664	0.145664	0.854337	0	0.0992892	0.0992892	-0.0992892	0	0.13852	0.13852	-0.13852	0	0.148021	0.148021	-0.148021
14.5865	14586.5	1	0.145499	0.145499	0.854501	1	0.0991785	0.0991785	0.900822	0	0.138351	0.138351	-0.138351	0	0.14784	0.14784	-0.14784
14.5965	14596.5	0	0.145334	0.145334	-0.145334	0	0.0990678	0.0990678	-0.0990678	0	0.138181	0.138181	-0.138181	0	0.147659	0.147659	-0.147659
14.6065	14606.5	0	0.145169	0.145169	-0.145169	0	0.0989572	0.0989572	-0.0989572	0	0.138012	0.138012	-0.138012	0	0.147478	0.147478	-0.147478
14.6165	14616.5	0	0.145004	0.145004	-0.145004	0	0.0988467	0.0988467	-0.0988467	0	0.137843	0.137843	-0.137843	1	0.147298	0.147298	0.852702
14.6265	14626.5	2	0.14484	0.14484	1.85516	0	0.0987362	0.0987362	-0.0987362	0	0.137674	0.137674	-0.137674	0	0.147117	0.147117	-0.147117
14.6365	14636.5	0	0.144675	0.144675	-0.144675	1	0.0986258	0.0986258	0.901374	0	0.137505	0.137505	-0.137505	0	0.146937	0.146937	-0.146937
14.6465	14646.5	0	0.144511	0.144511	-0.144511	0	0.0985154	0.0985154	-0.0985154	2	0.137335	0.137335	1.86266	0	0.146757	0.146757	-0.146757
14.6565	14656.5	0	0.144347	0.144347	-0.144347	0	0.0984051	0.0984051	-0.0984051	0	0.137167	0.137167	-0.137167	0	0.146577	0.146577	-0.146577
14.6665	14666.5	0	0.144182	0.144182	-0.144182	0	0.0982949	0.0982949	-0.0982949	0	0.136998	0.136998	-0.136998	0	0.146397	0.146397	-0.146397
14.6765	14676.5	0	0.144018	0.144018	-0.144018	0	0.0981847	0.0981847	-0.0981847	0	0.136829	0.136829	-0.136829	0	0.146217	0.146217	-0.146217
14.6865	14686.5	0	0.143854	0.143854	-0.143854	0	0.0980746	0.0980746	-0.0980746	0	0.136661	0.136661	-0.136661	0	0.146037	0.146037	-0.146037
14.6965	14696.5	0	0.14369	0.14369	-0.14369	0	0.0979646	0.0979646	-0.0979646	0	0.136492	0.136492	-0.136492	0	0.145857	0.145857	-0.145857
14.7065	14706.5	0	0.143527	0.143527	-0.143527	0	0.0978546	0.0978546	-0.0978546	0	0.136324	0.136324	-0.136324	0	0.145677	0.145677	-0.145677
14.7165	14716.5	0	0.143363	0.143363	-0.143363	0	0.0977447	0.0977447	-0.0977447	0	0.136156	0.136156	-0.136156	0	0.145498	0.145498	-0.145498
14.7265	14726.5	1	0.143199	0.143199	0.856801	0	0.0976348	0.0976348	-0.0976348	0	0.135988	0.135988	-0.135988	0	0.145319	0.145319	-0.145319
14.7365	14736.5	0	0.143036	0.143036	-0.143036	0	0.097525	0.097525	-0.097525	0	0.13582	0.13582	-0.13582	0	0.145139	0.145139	-0.145139
14.7465	14746.5	1	0.142872	0.142872	0.857128	0	0.0974153	0.0974153	-0.0974153	0	0.135652	0.135652	-0.135652	0	0.14496	0.14496	-0.14496
14.7565	14756.5	0	0.142709	0.142709	-0.142709	0	0.0973056	0.0973056	-0.0973056	0	0.135484	0.135484	-0.135484	0	0.144781	0.144781	-0.144781
14.7665	14766.5	0	0.142545	0.142545	-0.142545	0	0.097196	0.097196	-0.097196	0	0.135316	0.135316	-0.135316	0	0.144602	0.144602	-0.144602
14.7765	14776.5	0	0.142382	0.142382	-0.142382	0	0.0970864	0.0970864	-0.0970864	1	0.135149	0.135149	0.864851	1	0.144423	0.144423	0.855577
14.7865	14786.5	1	0.142219	0.142219	0.857781	0	0.096977	0.096977	-0.096977	1	0.134981	0.134981	0.865019	0	0.144244	0.144244	-0.144244
14.7965	14796.5	0	0.142056	0.142056	-0.142056	0	0.0968675	0.0968675	-0.0968675	0	0.134814	0.134814	-0.134814	0	0.144066	0.144066	-0.144066
14.8065	14806.5	0	0.141893	0.141893	-0.141893	0	0.0967582	0.0967582	-0.0967582	0	0.134646	0.134646	-0.134646	1	0.143887	0.143887	0.856113
14.8165	14816.5	0	0.141731	0.141731	-0.141731	0	0.0966489	0.0966489	-0.0966489	0	0.134479	0.134479	-0.134479	0	0.143709	0.143709	-0.143709
14.8265	14826.5	0	0.141568	0.141568	-0.141568	0	0.0965397	0.0965397	-0.0965397	0	0.134312	0.134312	-0.134312	0	0.14353	0.14353	-0.14353
14.8365	14836.5	0	0.141405	0.141405	-0.141405	0	0.0964305	0.0964305	-0.0964305	0	0.134145	0.134145	-0.134145	0	0.143352	0.143352	-0.143352
14.8465	14846.5	1	0.141243	0.141243	0.858757	1	0.0963213	0.0963213	0.903679	0	0.133978	0.133978	-0.133978	1	0.143174	0.143174	0.856826
14.8565	14856.5	0	0.14108	0.14108	-0.14108	0	0.0962123	0.0962123	-0.0962123	0	0.133811	0.133811	-0.133811	0	0.142996	0.142996	-0.142996
14.8665	14866.5	0	0.140918	0.140918	-0.140918	0	0.0961033	0.0961033	-0.0961033	0	0.133644	0.133644	-0.133644	0	0.142818	0.142818	-0.142818
14.8765	14876.5	0	0.140756	0.140756	-0.140756	0	0.0959944	0.0959944	-0.0959944	0	0.133477	0.133477	-0.133477	0	0.14264	0.14264	-0.14264
14.8865	14886.5	0	0.140593	0.140593	-0.140593	0	0.0958855	0.0958855	-0.0958855	0	0.133311	0.133311	-0.133311	0	0.142462	0.142462	-0.142462
14.8965	14896.5	0	0.140431	0.140431	-0.140431	0	0.0957767	0.0957767	-0.0957767	0	0.133144	0.133144	-0.133144	0	0.142285	0.142285	-0.142285
14.9065	14906.5	0	0.140269	0.140269	-0.140269	0	0.095668	0.095668	-0.095668	0	0.132978	0.132978	-0.132978	0	0.142107	0.142107	-0.142107
14.9165	14916.5	0	0.140107	0.140107	-0.140107	0	0.0955593	0.0955593	-0.0955593	0	0.132812	0.132812	-0.132812	0	0.14193	0.14193	-0.14193
14.9265	14926.5	0	0.139946	0.139946	-0.139946	0	0.0954507	0.0954507	-0.0954507	0	0.132646	0.132646	-0.132646	1	0.141753	0.141753	0.858248
14.9365	14936.5	0	0.139784	0.139784	-0.139784	0	0.0953422	0.0953422	-0.0953422	0	0.13248	0.13248	-0.13248	0	0.141575	0.141575	-0.141575
14.9465	14946.5	0	0.139622	0.139622	-0.139622	0	0.0952337	0.0952337	-0.0952337	1	0.132314	0.132314	0.867686	0	0.141398	0.141398	-0.141398
14.9565	14956.5	0	0.139461	0.139461	-0.139461	0	0.0951253	0.0951253	-0.0951253	1	0.132148	0.132148	0.867852	0	0.141221	0.141221	-0.141221
14.9665	14966.5	0	0.139299	0.139299	-0.139299	0	0.0950169	0.0950169	-0.0950169	1	0.131982	0.131982	0.868018	0	0.141044	0.141044	-0.141044
14.9765	14976.5	1	0.139138	0.139138	0.860862	0	0.0949086	0.0949086	-0.0949086	0	0.131816	0.131816	-0.131816	0	0.140868	0.140868	-0.140868
14.9865	14986.5	0	0.138977	0.138977	-0.138977	0	0.0948004	0.0948004	-0.0948004	0	0.131651	0.131651	-0.131651	0	0.140691	0.140691	-0.140691
14.9965	14996.5	2	0.138816	0.138816	1.86118	0	0.0946922	0.0946922	-0.0946922	0	0.131485	0.131485	-0.131485	0	0.140514	0.140514	-0.140514
15.0065	15006.5	0	0.138655	0.138655	-0.138655	0	0.0945841	0.0945841	-0.0945841	0	0.13132	0.13132	-0.13132	0	0.140338	0.140338	-0.140338
15.0165	15016.5	0	0.138494	0.138494	-0.138494	0	0.094476	0.094476	-0.094476	0	0.131155	0.131155	-0.131155	0	0.140162	0.140162	-0.140162
15.0265	15026.5	0	0.138333	0.138333	-0.138333	0	0.094368	0.094368	-0.094368	0	0.13099	0.13099	-0.13099	0	0.139985	0.139985	-0.139985
15.0365	15036.5	0	0.138172	0.138172	-0.138172	0	0.0942601	0.0942601	-0.0942601	0	0.130825	0.130825	-0.130825	0	0.139809	0.139809	-0.139809
15.0465	15046.5	0	0.138011	0.138011	-0.138011	0	0.0941522	0.0941522	-0.0941522	0	0.13066	0.13066	-0.13066	0	0.139633	0.139633	-0.139633
15.0565	15056.5	0	0.137851	0.137851	-0.137851	0	0.0940445	0.0940445	-0.0940445	0	0.130495	0.130495	-0.130495	0	0.139457	0.139457	-0.139457
15.0665	15066.5	0	0.13769	0.13769	-0.13769	0	0.0939367	0.0939367	-0.0939367	0	0.13033	0.13033	-0.13033	0	0.139281	0.139281	-0.139281
15.0765	15076.5	0	0.13753	0.13753	-0.13753	0	0.093829	0.093829	-0.093829	1	0.130165	0.130165	0.869835	0	0.139106	0.139106	-0.139106
15.0865	15086.5	0	0.13737	0.13737	-0.13737	0	0.0937214	0.0937214	-0.0937214	0	0.130001	0.130001	-0.130001	0	0.13893	0.13893	-0.13893
15.0965	15096.5	0	0.137209	0.137209	-0.137209	0	0.0936139	0.0936139	-0.0936139	0	0.129836	0.129836	-0.129836	0	0.138755	0.138755	-0.138755
15.1065	15106.5	0	0.137049	0.137049	-0.137049	1	0.0935064	0.0935064	0.906494	0	0.129672	0.129672	-0.129672	0	0.138579	0.138579	-0.138579
15.1165	15116.5	0	0.136889	0.136889	-0.136889	0	0.093399	0.093399	-0.093399	0	0.129508	0.129508	-0.129508	1	0.138404	0.138404	0.861596
15.1265	15126.5	0	0.136729	0.136729	-0.136729	1	0.0932916	0.0932916	0.906708	1	0.129344	0.129344	0.870657	1	0.138229	0.138229	0.861772
15.1365	15136.5	0	0.136569	0.136569	-0.136569	0	0.0931843	0.0931843	-0.0931843	0	0.129179	0.129179	-0.129179	0	0.138053	0.138053	-0.138053
15.1465	15146.5	0	0.136409	0.136409	-0.136409	0	0.0930771	0.0930771	-0.0930771	0	0.129015	0.129015	-0.129015	0	0.137878	0.137878	-0.137878
15.1565	15156.5	1	0.13625	0.13625	0.86375	0	0.0929699	0.0929699	-0.0929699	0	0.128852	0.128852	-0.128852	0	0.137704	0.137704	-0.137704
15.1665	15166.5	0	0.13609	0.13609	-0.13609	0	0.0928628	0.0928628	-0.0928628	0	0.128688	0.128688	-0.128688	0	0.137529	0.137529	-0.137529
15.1765	15176.5	0	0.135931	0.135931	-0.135931	0	0.0927557	0.0927557	-0.0927557	0	0.128524	0.128524	-0.128524	0	0.137354	0.137354	-0.137354
15.1865	15186.5	0	0.135771	0.135771	-0.135771	0	0.0926487	0.0926487	-0.0926487	0	0.12836	0.12836	-0.12836	0	0.13718	0.13718	-0.13718
15.1965	15196.5	0	0.135612	0.135612	-0.135612	0	0.0925418	0.0925418	-0.0925418	0	0.128197	0.128197	-0.128197	0	0.137005	0.137005	-0.137005
15.2065	15206.5	0	0.135453	0.135453	-0.135453	0	0.0924349	0.0924349	-0.0924349	0	0.128034	0.128034	-0.128034	0	0.136831	0.136831	-0.136831
15.2165	15216.5	0	0.135294	0.135294	-0.135294	0	0.0923282	0.0923282	-0.0923282	0	0.12787	0.12787	-0.12787	0	0.136656	0.136656	-0.136656
15.2265	15226.5	0	0.135135	0.135135	-0.135135	1	0.0922214	0.0922214	0.907779	0	0.127707	0.127707	-0.127707	0	0.136482	0.136482	-0.136482
15.2365	15236.5	0	0.134976	0.134976	-0.134976	0	0.0921147	0.0921147	-0.0921147	0	0.127544	0.127544	-0.127544	0	0.136308	0.136308	-0.136308
15.2465	15246.5	1	0.134817	0.134817	0.865183	0	0.0920081	0.0920081	-0.0920081	0	0.127381	0.127381	-0.127381	0	0.136134	0.136134	-0.136134
15.2565	15256.5	0	0.134658	0.134658	-0.134658	0	0.0919016	0.0919016	-0.0919016	0	0.127218	0.127218	-0.127218	0	0.135961	0.135961	-0.135961
15.2665	15266.5	0	0.134499	0.134499	-0.134499	0	0.0917951	0.0917951	-0.0917951	0	0.127055	0.127055	-0.127055	1	0.135787	0.135787	0.864213
15.2765	15276.5	0	0.134341	0.134341	-0.134341	0	0.0916886	0.0916886	-0.0916886	0	0.126893	0.126893	-0.126893	0	0.135613	0.135613	-0.135613
15.2865	15286.5	1	0.134183	0.134183	0.865818	0	0.0915823	0.0915823	-0.0915823	0	0.12673	0.12673	-0.12673	1	0.13544	0.13544	0.86456
15.2965	15296.5	0	0.134024	0.134024	-0.134024	0	0.091476	0.091476	-0.091476	0	0.126568	0.126568	-0.126568	0	0.135266	0.135266	-0.135266
15.3065	15306.5	0	0.133866	0.133866	-0.133866	0	0.0913697	0.0913697	-0.0913697	0	0.126405	0.126405	-0.126405	1	0.135093	0.135093	0.864907
15.3165	15316.5	1	0.133708	0.133708	0.866293	0	0.0912636	0.0912636	-0.0912636	0	0.126243	0.126243	-0.126243	0	0.13492	0.13492	-0.13492
15.3265	15326.5	0	0.133549	0.133549	-0.133549	0	0.0911574	0.0911574	-0.0911574	0	0.126081	0.126081	-0.126081	0	0.134746	0.134746	-0.134746
15.3365	15336.5	0	0.133391	0.133391	-0.133391	0	0.0910514	0.0910514	-0.0910514	1	0.125919	0.125919	0.874081	0	0.134574	0.134574	-0.134574
15.3465	15346.5	0	0.133234	0.133234	-0.133234	0	0.0909454	0.0909454	-0.0909454	0	0.125757	0.125757	-0.125757	0	0.134401	0.134401	-0.134401
15.3565	15356.5	0	0.133076	0.133076	-0.133076	0	0.0908395	0.0908395	-0.0908395	0	0.125595	0.125595	-0.125595	0	0.134228	0.134228	-0.134228
15.3665	15366.5	0	0.132918	0.132918	-0.132918	0	0.0907336	0.0907336	-0.0907336	1	0.125433	0.125433	0.874567	0	0.134055	0.134055	-0.134055
15.3765	15376.5	0	0.13276	0.13276	-0.13276	0	0.0906278	0.0906278	-0.0906278	0	0.125271	0.125271	-0.125271	0	0.133883	0.133883	-0.133883
15.3865	15386.5	0	0.132603	0.132603	-0.132603	0	0.0905221	0.0905221	-0.0905221	0	0.12511	0.12511	-0.12511	0	0.13371	0.13371	-0.13371
15.3965	15396.5	0	0.132445	0.132445	-0.132445	0	0.0904164	0.0904164	-0.0904164	0	0.124948	0.124948	-0.124948	0	0.133538	0.133538	-0.133538
15.4065	15406.5	0	0.132288	0.132288	-0.132288	0	0.0903107	0.0903107	-0.0903107	0	0.124787	0.124787	-0.124787	0	0.133365	0.133365	-0.133365
15.4165	15416.5	0	0.132131	0.132131	-0.132131	0	0.0902052	0.0902052	-0.0902052	0	0.124626	0.124626	-0.124626	1	0.133193	0.133193	0.866807
15.4265	15426.5	0	0.131973	0.131973	-0.131973	0	0.0900997	0.0900997	-0.0900997	0	0.124464	0.124464	-0.124464	0	0.133021	0.133021	-0.133021
15.4365	15436.5	0	0.131816	0.131816	-0.131816	0	0.0899943	0.0899943	-0.0899943	0	0.124303	0.124303	-0.124303	1	0.132849	0.132849	0.867151
15.4465	15446.5	0	0.131659	0.131659	-0.131659	1	0.0898889	0.0898889	0.910111	1	0.124142	0.124142	0.875858	0	0.132678	0.132678	-0.132678
15.4565	15456.5	0	0.131502	0.131502	-0.131502	0	0.0897836	0.0897836	-0.0897836	0	0.123981	0.123981	-0.123981	0	0.132506	0.132506	-0.132506
15.4665	15466.5	0	0.131346	0.131346	-0.131346	0	0.0896784	0.0896784	-0.0896784	0	0.123821	0.123821	-0.123821	0	0.132334	0.132334	-0.132334
15.4765	15476.5	0	0.131189	0.131189	-0.131189	0	0.0895732	0.0895732	-0.0895732	0	0.12366	0.12366	-0.12366	0	0.132163	0.132163	-0.132163
15.4865	15486.5	1	0.131032	0.131032	0.868968	0	0.0894681	0.0894681	-0.0894681	0	0.123499	0.123499	-0.123499	0	0.131991	0.131991	-0.131991
15.4965	15496.5	1	0.130876	0.130876	0.869124	0	0.089363	0.089363	-0.089363	0	0.123339	0.123339	-0.123339	0	0.13182	0.13182	-0.13182
15.5065	15506.5	0	0.130719	0.130719	-0.130719	1	0.089258	0.089258	0.910742	0	0.123178	0.123178	-0.123178	1	0.131649	0.131649	0.868351
15.5165	15516.5	0	0.130563	0.130563	-0.130563	0	0.0891531	0.0891531	-0.0891531	0	0.123018	0.123018	-0.123018	0	0.131478	0.131478	-0.131478
15.5265	15526.5	0	0.130407	0.130407	-0.130407	0	0.0890482	0.0890482	-0.0890482	0	0.122858	0.122858	-0.122858	0	0.131306	0.131306	-0.131306
15.5365	15536.5	1	0.13025	0.13025	0.869749	0	0.0889434	0.0889434	-0.0889434	0	0.122698	0.122698	-0.122698	0	0.131136	0.131136	-0.131136
15.5465	15546.5	0	0.130095	0.130095	-0.130095	0	0.0888387	0.0888387	-0.0888387	0	0.122538	0.122538	-0.122538	0	0.130965	0.130965	-0.130965
15.5565	15556.5	0	0.129939	0.129939	-0.129939	0	0.088734	0.088734	-0.088734	0	0.122378	0.122378	-0.122378	2	0.130794	0.130794	1.86921
15.5665	15566.5	0	0.129783	0.129783	-0.129783	0	0.0886294	0.0886294	-0.0886294	0	0.122218	0.122218	-0.122218	0	0.130624	0.130624	-0.130624
15.5765	15576.5	0	0.129627	0.129627	-0.129627	0	0.0885249	0.0885249	-0.0885249	0	0.122058	0.122058	-0.122058	1	0.130453	0.130453	0.869547
15.5865	15586.5	0	0.129471	0.129471	-0.129471	0	0.0884203	0.0884203	-0.0884203	0	0.121899	0.121899	-0.121899	0	0.130283	0.130283	-0.130283
15.5965	15596.5	0	0.129315	0.129315	-0.129315	0	0.0883159	0.0883159	-0.0883159	1	0.121739	0.121739	0.878261	0	0.130112	0.130112	-0.130112
15.6065	15606.5	0	0.12916	0.12916	-0.12916	0	0.0882115	0.0882115	-0.0882115	0	0.12158	0.12158	-0.12158	0	0.129942	0.129942	-0.129942
15.6165	15616.5	0	0.129004	0.129004	-0.129004	0	0.0881072	0.0881072	-0.0881072	0	0.121421	0.121421	-0.121421	0	0.129772	0.129772	-0.129772
15.6265	15626.5	1	0.128849	0.128849	0.871151	0	0.088003	0.088003	-0.088003	0	0.121261	0.121261	-0.121261	0	0.129602	0.129602	-0.129602
15.6365	15636.5	0	0.128694	0.128694	-0.128694	0	0.0878988	0.0878988	-0.0878988	0	0.121102	0.121102	-0.121102	0	0.129433	0.129433	-0.129433
15.6465	15646.5	0	0.128539	0.128539	-0.128539	0	0.0877947	0.0877947	-0.0877947	0	0.120943	0.120943	-0.120943	0	0.129263	0.129263	-0.129263
15.6565	15656.5	0	0.128384	0.128384	-0.128384	0	0.0876906	0.0876906	-0.0876906	0	0.120784	0.120784	-0.120784	0	0.129093	0.129093	-0.129093
15.6665	15666.5	0	0.128229	0.128229	-0.128229	0	0.0875866	0.0875866	-0.0875866	0	0.120625	0.120625	-0.120625	0	0.128924	0.128924	-0.128924
15.6765	15676.5	1	0.128074	0.128074	0.871926	0	0.0874827	0.0874827	-0.0874827	0	0.120467	0.120467	-0.120467	0	0.128754	0.128754	-0.128754
15.6865	15686.5	0	0.127919	0.127919	-0.127919	0	0.0873788	0.0873788	-0.0873788	1	0.120308	0.120308	0.879692	0	0.128585	0.128585	-0.128585
15.6965	15696.5	0	0.127764	0.127764	-0.127764	1	0.087275	0.087275	0.912725	1	0.12015	0.12015	0.87985	0	0.128416	0.128416	-0.128416
15.7065	15706.5	0	0.12761	0.12761	-0.12761	0	0.0871713	0.0871713	-0.0871713	1	0.119991	0.119991	0.880009	0	0.128247	0.128247	-0.128247
15.7165	15716.5	0	0.127455	0.127455	-0.127455	0	0.0870676	0.0870676	-0.0870676	0	0.119833	0.119833	-0.119833	0	0.128078	0.128078	-0.128078
15.7265	15726.5	0	0.127301	0.127301	-0.127301	0	0.086964	0.086964	-0.086964	1	0.119675	0.119675	0.880325	0	0.127909	0.127909	-0.127909
15.7365	15736.5	0	0.127146	0.127146	-0.127146	0	0.0868604	0.0868604	-0.0868604	1	0.119516	0.119516	0.880483	0	0.12774	0.12774	-0.12774
15.7465	15746.5	0	0.126992	0.126992	-0.126992	0	0.0867569	0.0867569	-0.0867569	0	0.119359	0.119359	-0.119359	1	0.127571	0.127571	0.872429
15.7565	15756.5	0	0.126838	0.126838	-0.126838	0	0.0866535	0.0866535	-0.0866535	0	0.119201	0.119201	-0.119201	0	0.127403	0.127403	-0.127403
15.7665	15766.5	0	0.126684	0.126684	-0.126684	0	0.0865502	0.0865502	-0.0865502	0	0.119043	0.119043	-0.119043	0	0.127234	0.127234	-0.127234
15.7765	15776.5	0	0.12653	0.12653	-0.12653	0	0.0864468	0.0864468	-0.0864468	0	0.118885	0.118885	-0.118885	0	0.127066	0.127066	-0.127066
15.7865	15786.5	0	0.126376	0.126376	-0.126376	0	0.0863436	0.0863436	-0.0863436	0	0.118727	0.118727	-0.118727	0	0.126897	0.126897	-0.126897
15.7965	15796.5	0	0.126223	0.126223	-0.126223	0	0.0862404	0.0862404	-0.0862404	0	0.11857	0.11857	-0.11857	0	0.126729	0.126729	-0.126729
15.8065	15806.5	0	0.126069	0.126069	-0.126069	0	0.0861373	0.0861373	-0.0861373	0	0.118412	0.118412	-0.118412	0	0.126561	0.126561	-0.126561
15.8165	15816.5	0	0.125915	0.125915	-0.125915	0	0.0860342	0.0860342	-0.0860342	0	0.118255	0.118255	-0.118255	0	0.126393	0.126393	-0.126393
15.8265	15826.5	0	0.125762	0.125762	-0.125762	0	0.0859312	0.0859312	-0.0859312	0	0.118098	0.118098	-0.118098	0	0.126225	0.126225	-0.126225
15.8365	15836.5	0	0.125608	0.125608	-0.125608	1	0.0858283	0.0858283	0.914172	0	0.117941	0.117941	-0.117941	0	0.126058	0.126058	-0.126058
15.8465	15846.5	1	0.125455	0.125455	0.874545	0	0.0857254	0.0857254	-0.0857254	0	0.117784	0.117784	-0.117784	0	0.12589	0.12589	-0.12589
15.8565	15856.5	0	0.125302	0.125302	-0.125302	0	0.0856226	0.0856226	-0.0856226	0	0.117627	0.117627	-0.117627	0	0.125722	0.125722	-0.125722
15.8665	15866.5	1	0.125149	0.125149	0.874851	0	0.0855199	0.0855199	-0.0855199	0	0.11747	0.11747	-0.11747	0	0.125555	0.125555	-0.125555
15.8765	15876.5	0	0.124996	0.124996	-0.124996	0	0.0854172	0.0854172	-0.0854172	0	0.117313	0.117313	-0.117313	0	0.125388	0.125388	-0.125388
15.8865	15886.5	0	0.124843	0.124843	-0.124843	0	0.0853146	0.0853146	-0.0853146	0	0.117157	0.117157	-0.117157	0	0.125221	0.125221	-0.125221
15.8965	15896.5	0	0.12469	0.12469	-0.12469	1	0.085212	0.085212	0.914788	1	0.117	0.117	0.883	0	0.125053	0.125053	-0.125053
15.9065	15906.5	0	0.124537	0.124537	-0.124537	0	0.0851095	0.0851095	-0.0851095	0	0.116844	0.116844	-0.116844	1	0.124886	0.124886	0.875114
15.9165	15916.5	0	0.124384	0.124384	-0.124384	0	0.0850071	0.0850071	-0.0850071	0	0.116687	0.116687	-0.116687	0	0.124719	0.124719	-0.124719
15.9265	15926.5	0	0.124232	0.124232	-0.124232	0	0.0849047	0.0849047	-0.0849047	0	0.116531	0.116531	-0.116531	0	0.124553	0.124553	-0.124553
15.9365	15936.5	1	0.124079	0.124079	0.87592	0	0.0848024	0.0848024	-0.0848024	1	0.116375	0.116375	0.883625	1	0.124386	0.124386	0.875614
15.9465	15946.5	0	0.123927	0.123927	-0.123927	0	0.0847001	0.0847001	-0.0847001	0	0.116219	0.116219	-0.116219	0	0.124219	0.124219	-0.124219
15.9565	15956.5	0	0.123775	0.123775	-0.123775	0	0.084598	0.084598	-0.084598	0	0.116063	0.116063	-0.116063	0	0.124053	0.124053	-0.124053
15.9665	15966.5	1	0.123622	0.123622	0.876378	0	0.0844958	0.0844958	-0.0844958	0	0.115907	0.115907	-0.115907	0	0.123886	0.123886	-0.123886
15.9765	15976.5	0	0.12347	0.12347	-0.12347	0	0.0843938	0.0843938	-0.0843938	0	0.115751	0.115751	-0.115751	0	0.12372	0.12372	-0.12372
15.9865	15986.5	0	0.123318	0.123318	-0.123318	1	0.0842918	0.0842918	0.915708	0	0.115596	0.115596	-0.115596	0	0.123554	0.123554	-0.123554
15.9965	15996.5	0	0.123166	0.123166	-0.123166	0	0.0841898	0.0841898	-0.0841898	0	0.11544	0.11544	-0.11544	0	0.123388	0.123388	-0.123388
16.0065	16006.5	0	0.123015	0.123015	-0.123015	0	0.084088	0.084088	-0.084088	0	0.115285	0.115285	-0.115285	0	0.123222	0.123222	-0.123222
16.0165	16016.5	0	0.122863	0.122863	-0.122863	0	0.0839862	0.0839862	-0.0839862	0	0.115129	0.115129	-0.115129	0	0.123056	0.123056	-0.123056
16.0265	16026.5	0	0.122711	0.122711	-0.122711	0	0.0838844	0.0838844	-0.0838844	0	0.114974	0.114974	-0.114974	0	0.12289	0.12289	-0.12289
16.0365	16036.5	0	0.12256	0.12256	-0.12256	0	0.0837827	0.0837827	-0.0837827	0	0.114819	0.114819	-0.114819	0	0.122725	0.122725	-0.122725
16.0465	16046.5	0	0.122408	0.122408	-0.122408	0	0.0836811	0.0836811	-0.0836811	0	0.114664	0.114664	-0.114664	0	0.122559	0.122559	-0.122559
16.0565	16056.5	0	0.122257	0.122257	-0.122257	0	0.0835795	0.0835795	-0.0835795	0	0.114509	0.114509	-0.114509	1	0.122394	0.122394	0.877606
16.0665	16066.5	0	0.122106	0.122106	-0.122106	0	0.0834781	0.0834781	-0.0834781	0	0.114354	0.114354	-0.114354	0	0.122229	0.122229	-0.122229
16.0765	16076.5	0	0.121954	0.121954	-0.121954	0	0.0833766	0.0833766	-0.0833766	0	0.114199	0.114199	-0.114199	0	0.122063	0.122063	-0.122063
16.0865	16086.5	0	0.121803	0.121803	-0.121803	0	0.0832752	0.0832752	-0.0832752	0	0.114045	0.114045	-0.114045	0	0.121898	0.121898	-0.121898
16.0965	16096.5	0	0.121652	0.121652	-0.121652	0	0.0831739	0.0831739	-0.0831739	0	0.11389	0.11389	-0.11389	0	0.121733	0.121733	-0.121733
16.1065	16106.5	0	0.121501	0.121501	-0.121501	0	0.0830727	0.0830727	-0.0830727	0	0.113736	0.113736	-0.113736	0	0.121568	0.121568	-0.121568
16.1165	16116.5	0	0.121351	0.121351	-0.121351	0	0.0829715	0.0829715	-0.0829715	0	0.113581	0.113581	-0.113581	0	0.121403	0.121403	-0.121403
16.1265	16126.5	0	0.1212	0.1212	-0.1212	0	0.0828704	0.0828704	-0.0828704	0	0.113427	0.113427	-0.113427	0	0.121239	0.121239	-0.121239
16.1365	16136.5	0	0.121049	0.121049	-0.121049	0	0.0827693	0.0827693	-0.0827693	0	0.113273	0.113273	-0.113273	0	0.121074	0.121074	-0.121074
16.1465	16146.5	0	0.120899	0.120899	-0.120899	0	0.0826683	0.0826683	-0.0826683	0	0.113119	0.113119	-0.113119	0	0.12091	0.12091	-0.12091
16.1565	16156.5	0	0.120748	0.120748	-0.120748	0	0.0825674	0.0825674	-0.0825674	0	0.112965	0.112965	-0.112965	0	0.120745	0.120745	-0.120745
16.1665	16166.5	0	0.120598	0.120598	-0.120598	0	0.0824665	0.0824665	-0.0824665	0	0.112811	0.112811	-0.112811	0	0.120581	0.120581	-0.120581
16.1765	16176.5	0	0.120448	0.120448	-0.120448	0	0.0823657	0.0823657	-0.0823657	0	0.112657	0.112657	-0.112657	0	0.120417	0.120417	-0.120417
16.1865	16186.5	0	0.120298	0.120298	-0.120298	0	0.0822649	0.0822649	-0.0822649	0	0.112504	0.112504	-0.112504	0	0.120253	0.120253	-0.120253
16.1965	16196.5	0	0.120147	0.120147	-0.120147	0	0.0821643	0.0821643	-0.0821643	0	0.11235	0.11235	-0.11235	0	0.120089	0.120089	-0.120089
16.2065	16206.5	0	0.119997	0.119997	-0.119997	0	0.0820636	0.0820636	-0.0820636	0	0.112197	0.112197	-0.112197	0	0.119925	0.119925	-0.119925
16.2165	16216.5	0	0.119847	0.119847	-0.119847	0	0.0819631	0.0819631	-0.0819631	0	0.112043	0.112043	-0.112043	0	0.119761	0.119761	-0.119761
16.2265	16226.5	0	0.119698	0.119698	-0.119698	0	0.0818626	0.0818626	-0.0818626	0	0.11189	0.11189	-0.11189	0	0.119598	0.119598	-0.119598
16.2365	16236.5	0	0.119548	0.119548	-0.119548	0	0.0817621	0.0817621	-0.0817621	0	0.111737	0.111737	-0.111737	0	0.119434	0.119434	-0.119434
16.2465	16246.5	0	0.119398	0.119398	-0.119398	0	0.0816618	0.0816618	-0.0816618	0	0.111584	0.111584	-0.111584	0	0.119271	0.119271	-0.119271
16.2565	16256.5	0	0.119249	0.119249	-0.119249	0	0.0815614	0.0815614	-0.0815614	0	0.111431	0.111431	-0.111431	0	0.119107	0.119107	-0.119107
16.2665	16266.5	1	0.119099	0.119099	0.8809	0	0.0814612	0.0814612	-0.0814612	0	0.111278	0.111278	-0.111278	0	0.118944	0.118944	-0.118944
16.2765	16276.5	0	0.11895	0.11895	-0.11895	0	0.081361	0.081361	-0.081361	0	0.111125	0.111125	-0.111125	0	0.118781	0.118781	-0.118781
16.2865	16286.5	0	0.118801	0.118801	-0.118801	0	0.0812609	0.0812609	-0.0812609	0	0.110973	0.110973	-0.110973	1	0.118618	0.118618	0.881382
16.2965	16296.5	1	0.118652	0.118652	0.881348	0	0.0811608	0.0811608	-0.0811608	0	0.11082	0.11082	-0.11082	0	0.118455	0.118455	-0.118455
16.3065	16306.5	1	0.118503	0.118503	0.881497	0	0.0810608	0.0810608	-0.0810608	0	0.110668	0.110668	-0.110668	0	0.118292	0.118292	-0.118292
16.3165	16316.5	0	0.118354	0.118354	-0.118354	0	0.0809609	0.0809609	-0.0809609	0	0.110515	0.110515	-0.110515	1	0.118129	0.118129	0.881871
16.3265	16326.5	0	0.118205	0.118205	-0.118205	0	0.080861	0.080861	-0.080861	0	0.110363	0.110363	-0.110363	0	0.117967	0.117967	-0.117967
16.3365	16336.5	0	0.118056	0.118056	-0.118056	0	0.0807612	0.0807612	-0.0807612	0	0.110211	0.110211	-0.110211	1	0.117804	0.117804	0.882196
16.3465	16346.5	0	0.117907	0.117907	-0.117907	0	0.0806614	0.0806614	-0.0806614	0	0.110059	0.110059	-0.110059	0	0.117642	0.117642	-0.117642
16.3565	16356.5	0	0.117759	0.117759	-0.117759	0	0.0805617	0.0805617	-0.0805617	0	0.109907	0.109907	-0.109907	1	0.11748	0.11748	0.88252
16.3665	16366.5	1	0.11761	0.11761	0.88239	0	0.0804621	0.0804621	-0.0804621	0	0.109755	0.109755	-0.109755	0	0.117317	0.117317	-0.117317
16.3765	16376.5	0	0.117462	0.117462	-0.117462	0	0.0803626	0.0803626	-0.0803626	0	0.109603	0.109603	-0.109603	0	0.117155	0.117155	-0.117155
16.3865	16386.5	0	0.117314	0.117314	-0.117314	0	0.0802631	0.0802631	-0.0802631	1	0.109451	0.109451	0.890549	0	0.116994	0.116994	-0.116994
16.3965	16396.5	0	0.117165	0.117165	-0.117165	0	0.0801636	0.0801636	-0.0801636	0	0.1093	0.1093	-0.1093	0	0.116832	0.116832	-0.116832
16.4065	16406.5	0	0.117017	0.117017	-0.117017	0	0.0800642	0.0800642	-0.0800642	0	0.109148	0.109148	-0.109148	0	0.11667	0.11667	-0.11667
16.4165	16416.5	0	0.116869	0.116869	-0.116869	0	0.0799649	0.0799649	-0.0799649	0	0.108997	0.108997	-0.108997	0	0.116508	0.116508	-0.116508
16.4265	16426.5	0	0.116721	0.116721	-0.116721	0	0.0798657	0.0798657	-0.0798657	0	0.108846	0.108846	-0.108846	0	0.116347	0.116347	-0.116347
16.4365	16436.5	0	0.116573	0.116573	-0.116573	0	0.0797665	0.0797665	-0.0797665	0	0.108694	0.108694	-0.108694	0	0.116185	0.116185	-0.116185
16.4465	16446.5	1	0.116425	0.116425	0.883575	0	0.0796674	0.0796674	-0.0796674	0	0.108543	0.108543	-0.108543	0	0.116024	0.116024	-0.116024
16.4565	16456.5	0	0.116278	0.116278	-0.116278	0	0.0795683	0.0795683	-0.0795683	0	0.108392	0.108392	-0.108392	0	0.115863	0.115863	-0.115863
16.4665	16466.5	0	0.11613	0.11613	-0.11613	0	0.0794693	0.0794693	-0.0794693	0	0.108242	0.108242	-0.108242	0	0.115701	0.115701	-0.115701
16.4765	16476.5	0	0.115983	0.115983	-0.115983	0	0.0793704	0.0793704	-0.0793704	0	0.108091	0.108091	-0.108091	0	0.11554	0.11554	-0.11554
16.4865	16486.5	0	0.115835	0.115835	-0.115835	0	0.0792715	0.0792715	-0.0792715	0	0.10794	0.10794	-0.10794	0	0.11538	0.11538	-0.11538
16.4965	16496.5	0	0.115688	0.115688	-0.115688	0	0.0791726	0.0791726	-0.0791726	0	0.107789	0.107789	-0.107789	0	0.115219	0.115219	-0.115219
16.5065	16506.5	0	0.115541	0.115541	-0.115541	0	0.0790739	0.0790739	-0.0790739	0	0.107639	0.107639	-0.107639	0	0.115058	0.115058	-0.115058
16.5165	16516.5	0	0.115394	0.115394	-0.115394	0	0.0789752	0.0789752	-0.0789752	0	0.107489	0.107489	-0.107489	0	0.114897	0.114897	-0.114897
16.5265	16526.5	0	0.115247	0.115247	-0.115247	0	0.0788766	0.0788766	-0.0788766	0	0.107338	0.107338	-0.107338	0	0.114737	0.114737	-0.114737
16.5365	16536.5	0	0.1151	0.1151	-0.1151	0	0.078778	0.078778	-0.078778	0	0.107188	0.107188	-0.107188	0	0.114577	0.114577	-0.114577
16.5465	16546.5	0	0.114953	0.114953	-0.114953	0	0.0786795	0.0786795	-0.0786795	0	0.107038	0.107038	-0.107038	0	0.114416	0.114416	-0.114416
16.5565	16556.5	0	0.114806	0.114806	-0.114806	0	0.078581	0.078581	-0.078581	0	0.106888	0.106888	-0.106888	1	0.114256	0.114256	0.885744
16.5665	16566.5	1	0.114659	0.114659	0.885341	0	0.0784827	0.0784827	-0.0784827	0	0.106738	0.106738	-0.106738	0	0.114096	0.114096	-0.114096
16.5765	16576.5	0	0.114513	0.114513	-0.114513	1	0.0783843	0.0783843	0.921616	0	0.106588	0.106588	-0.106588	0	0.113936	0.113936	-0.113936
16.5865	16586.5	0	0.114366	0.114366	-0.114366	0	0.0782861	0.0782861	-0.0782861	0	0.106439	0.106439	-0.106439	0	0.113776	0.113776	-0.113776
16.5965	16596.5	0	0.11422	0.11422	-0.11422	0	0.0781879	0.0781879	-0.0781879	1	0.106289	0.106289	0.893711	0	0.113616	0.113616	-0.113616
16.6065	16606.5	0	0.114074	0.114074	-0.114074	0	0.0780898	0.0780898	-0.0780898	0	0.10614	0.10614	-0.10614	0	0.113457	0.113457	-0.113457
16.6165	16616.5	0	0.113928	0.113928	-0.113928	0	0.0779917	0.0779917	-0.0779917	0	0.10599	0.10599	-0.10599	0	0.113297	0.113297	-0.113297
16.6265	16626.5	0	0.113781	0.113781	-0.113781	0	0.0778937	0.0778937	-0.0778937	0	0.105841	0.105841	-0.105841	0	0.113138	0.113138	-0.113138
16.6365	16636.5	0	0.113635	0.113635	-0.113635	0	0.0777957	0.0777957	-0.0777957	0	0.105692	0.105692	-0.105692	0	0.112978	0.112978	-0.112978
16.6465	16646.5	0	0.113489	0.113489	-0.113489	1	0.0776979	0.0776979	0.922302	0	0.105543	0.105543	-0.105543	0	0.112819	0.112819	-0.112819
16.6565	16656.5	0	0.113344	0.113344	-0.113344	1	0.0776001	0.0776001	0.9224	0	0.105394	0.105394	-0.105394	0	0.11266	0.11266	-0.11266
16.6665	16666.5	0	0.113198	0.113198	-0.113198	0	0.0775023	0.0775023	-0.0775023	0	0.105245	0.105245	-0.105245	0	0.112501	0.112501	-0.112501
16.6765	16676.5	0	0.113052	0.113052	-0.113052	0	0.0774046	0.0774046	-0.0774046	0	0.105096	0.105096	-0.105096	0	0.112342	0.112342	-0.112342
16.6865	16686.5	0	0.112907	0.112907	-0.112907	0	0.077307	0.077307	-0.077307	0	0.104947	0.104947	-0.104947	0	0.112183	0.112183	-0.112183
16.6965	16696.5	0	0.112761	0.112761	-0.112761	0	0.0772094	0.0772094	-0.0772094	0	0.104799	0.104799	-0.104799	0	0.112025	0.112025	-0.112025
16.7065	16706.5	0	0.112616	0.112616	-0.112616	0	0.0771119	0.0771119	-0.0771119	1	0.10465	0.10465	0.89535	1	0.111866	0.111866	0.888134
16.7165	16716.5	0	0.112471	0.112471	-0.112471	0	0.0770145	0.0770145	-0.0770145	0	0.104502	0.104502	-0.104502	0	0.111708	0.111708	-0.111708
16.7265	16726.5	0	0.112325	0.112325	-0.112325	0	0.0769171	0.0769171	-0.0769171	1	0.104353	0.104353	0.895647	1	0.111549	0.111549	0.888451
16.7365	16736.5	0	0.11218	0.11218	-0.11218	0	0.0768198	0.0768198	-0.0768198	0	0.104205	0.104205	-0.104205	0	0.111391	0.111391	-0.111391
16.7465	16746.5	0	0.112035	0.112035	-0.112035	0	0.0767225	0.0767225	-0.0767225	0	0.104057	0.104057	-0.104057	1	0.111233	0.111233	0.888767
16.7565	16756.5	0	0.11189	0.11189	-0.11189	0	0.0766253	0.0766253	-0.0766253	0	0.103909	0.103909	-0.103909	0	0.111075	0.111075	-0.111075
16.7665	16766.5	0	0.111745	0.111745	-0.111745	0	0.0765282	0.0765282	-0.0765282	0	0.103761	0.103761	-0.103761	0	0.110917	0.110917	-0.110917
16.7765	16776.5	1	0.111601	0.111601	0.888399	0	0.0764311	0.0764311	-0.0764311	0	0.103613	0.103613	-0.103613	1	0.110759	0.110759	0.889241
16.7865	16786.5	0	0.111456	0.111456	-0.111456	0	0.0763341	0.0763341	-0.0763341	0	0.103466	0.103466	-0.103466	0	0.110601	0.110601	-0.110601
16.7965	16796.5	0	0.111312	0.111312	-0.111312	0	0.0762372	0.0762372	-0.0762372	1	0.103318	0.103318	0.896682	0	0.110443	0.110443	-0.110443
16.8065	16806.5	0	0.111167	0.111167	-0.111167	0	0.0761403	0.0761403	-0.0761403	0	0.103171	0.103171	-0.103171	0	0.110286	0.110286	-0.110286
16.8165	16816.5	0	0.111023	0.111023	-0.111023	0	0.0760435	0.0760435	-0.0760435	0	0.103023	0.103023	-0.103023	1	0.110128	0.110128	0.889872
16.8265	16826.5	0	0.110879	0.110879	-0.110879	0	0.0759467	0.0759467	-0.0759467	1	0.102876	0.102876	0.897124	0	0.109971	0.109971	-0.109971
16.8365	16836.5	0	0.110734	0.110734	-0.110734	0	0.07585	0.07585	-0.07585	0	0.102729	0.102729	-0.102729	0	0.109814	0.109814	-0.109814
16.8465	16846.5	0	0.11059	0.11059	-0.11059	0	0.0757534	0.0757534	-0.0757534	0	0.102582	0.102582	-0.102582	0	0.109657	0.109657	-0.109657
16.8565	16856.5	1	0.110446	0.110446	0.889554	0	0.0756568	0.0756568	-0.0756568	0	0.102434	0.102434	-0.102434	1	0.109499	0.109499	0.890501
16.8665	16866.5	0	0.110302	0.110302	-0.110302	0	0.0755603	0.0755603	-0.0755603	0	0.102288	0.102288	-0.102288	0	0.109343	0.109343	-0.109343
16.8765	16876.5	0	0.110159	0.110159	-0.110159	0	0.0754639	0.0754639	-0.0754639	0	0.102141	0.102141	-0.102141	0	0.109186	0.109186	-0.109186
16.8865	16886.5	0	0.110015	0.110015	-0.110015	0	0.0753675	0.0753675	-0.0753675	0	0.101994	0.101994	-0.101994	1	0.109029	0.109029	0.890971
16.8965	16896.5	0	0.109871	0.109871	-0.109871	0	0.0752712	0.0752712	-0.0752712	1	0.101847	0.101847	0.898153	0	0.108872	0.108872	-0.108872
16.9065	16906.5	0	0.109728	0.109728	-0.109728	1	0.0751749	0.0751749	0.924825	1	0.101701	0.101701	0.898299	0	0.108716	0.108716	-0.108716
16.9165	16916.5	0	0.109584	0.109584	-0.109584	0	0.0750787	0.0750787	-0.0750787	0	0.101555	0.101555	-0.101555	0	0.10856	0.10856	-0.10856
16.9265	16926.5	0	0.109441	0.109441	-0.109441	0	0.0749826	0.0749826	-0.0749826	0	0.101408	0.101408	-0.101408	0	0.108403	0.108403	-0.108403
16.9365	16936.5	0	0.109298	0.109298	-0.109298	0	0.0748865	0.0748865	-0.0748865	0	0.101262	0.101262	-0.101262	0	0.108247	0.108247	-0.108247
16.9465	16946.5	0	0.109155	0.109155	-0.109155	0	0.0747905	0.0747905	-0.0747905	0	0.101116	0.101116	-0.101116	0	0.108091	0.108091	-0.108091
16.9565	16956.5	0	0.109011	0.109011	-0.109011	0	0.0746946	0.0746946	-0.0746946	1	0.10097	0.10097	0.89903	0	0.107935	0.107935	-0.107935
16.9665	16966.5	0	0.108869	0.108869	-0.108869	0	0.0745987	0.0745987	-0.0745987	0	0.100824	0.100824	-0.100824	0	0.107779	0.107779	-0.107779
16.9765	16976.5	0	0.108726	0.108726	-0.108726	0	0.0745029	0.0745029	-0.0745029	0	0.100678	0.100678	-0.100678	0	0.107623	0.107623	-0.107623
16.9865	16986.5	0	0.108583	0.108583	-0.108583	0	0.0744071	0.0744071	-0.0744071	0	0.100532	0.100532	-0.100532	0	0.107468	0.107468	-0.107468
16.9965	16996.5	0	0.10844	0.10844	-0.10844	0	0.0743114	0.0743114	-0.0743114	0	0.100387	0.100387	-0.100387	0	0.107312	0.107312	-0.107312
17.0065	17006.5	0	0.108298	0.108298	-0.108298	0	0.0742158	0.0742158	-0.0742158	0	0.100241	0.100241	-0.100241	0	0.107157	0.107157	-0.107157
17.0165	17016.5	0	0.108155	0.108155	-0.108155	0	0.0741202	0.0741202	-0.0741202	0	0.100096	0.100096	-0.100096	0	0.107001	0.107001	-0.107001
17.0265	17026.5	1	0.108013	0.108013	0.891987	0	0.0740247	0.0740247	-0.0740247	0	0.0999504	0.0999504	-0.0999504	0	0.106846	0.106846	-0.106846
17.0365	17036.5	0	0.10787	0.10787	-0.10787	0	0.0739293	0.0739293	-0.0739293	0	0.0998052	0.0998052	-0.0998052	0	0.106691	0.106691	-0.106691
17.0465	17046.5	0	0.107728	0.107728	-0.107728	0	0.0738339	0.0738339	-0.0738339	0	0.09966	0.09966	-0.09966	0	0.106536	0.106536	-0.106536
17.0565	17056.5	0	0.107586	0.107586	-0.107586	0	0.0737385	0.0737385	-0.0737385	0	0.0995151	0.0995151	-0.0995151	0	0.106381	0.106381	-0.106381
17.0665	17066.5	0	0.107444	0.107444	-0.107444	0	0.0736433	0.0736433	-0.0736433	0	0.0993701	0.0993701	-0.0993701	0	0.106226	0.106226	-0.106226
17.0765	17076.5	0	0.107302	0.107302	-0.107302	0	0.0735481	0.0735481	-0.0735481	0	0.0992253	0.0992253	-0.0992253	0	0.106071	0.106071	-0.106071
17.0865	17086.5	0	0.10716	0.10716	-0.10716	0	0.073453	0.073453	-0.073453	0	0.0990806	0.0990806	-0.0990806	0	0.105917	0.105917	-0.105917
17.0965	17096.5	0	0.107018	0.107018	-0.107018	0	0.0733579	0.0733579	-0.0733579	1	0.098936	0.098936	0.901064	0	0.105762	0.105762	-0.105762
17.1065	17106.5	1	0.106877	0.106877	0.893123	0	0.0732629	0.0732629	-0.0732629	0	0.0987914	0.0987914	-0.0987914	0	0.105608	0.105608	-0.105608
17.1165	17116.5	0	0.106735	0.106735	-0.106735	0	0.0731679	0.0731679	-0.0731679	0	0.0986469	0.0986469	-0.0986469	0	0.105454	0.105454	-0.105454
17.1265	17126.5	0	0.106593	0.106593	-0.106593	0	0.0730731	0.0730731	-0.0730731	0	0.0985026	0.0985026	-0.0985026	0	0.105299	0.105299	-0.105299
17.1365	17136.5	1	0.106452	0.106452	0.893548	0	0.0729782	0.0729782	-0.0729782	0	0.0983583	0.0983583	-0.0983583	0	0.105145	0.105145	-0.105145
17.1465	17146.5	0	0.106311	0.106311	-0.106311	0	0.0728835	0.0728835	-0.0728835	0	0.0982143	0.0982143	-0.0982143	0	0.104991	0.104991	-0.104991
17.1565	17156.5	0	0.106169	0.106169	-0.106169	0	0.0727888	0.0727888	-0.0727888	0	0.0980702	0.0980702	-0.0980702	0	0.104838	0.104838	-0.104838
17.1665	17166.5	0	0.106028	0.106028	-0.106028	0	0.0726941	0.0726941	-0.0726941	0	0.0979263	0.0979263	-0.0979263	1	0.104684	0.104684	0.895316
17.1765	17176.5	0	0.105887	0.105887	-0.105887	0	0.0725996	0.0725996	-0.0725996	0	0.0977824	0.0977824	-0.0977824	0	0.10453	0.10453	-0.10453
17.1865	17186.5	0	0.105746	0.105746	-0.105746	0	0.0725051	0.0725051	-0.0725051	0	0.0976387	0.0976387	-0.0976387	0	0.104376	0.104376	-0.104376
17.1965	17196.5	0	0.105606	0.105606	-0.105606	0	0.0724106	0.0724106	-0.0724106	0	0.0974951	0.0974951	-0.0974951	0	0.104223	0.104223	-0.104223
17.2065	17206.5	0	0.105465	0.105465	-0.105465	0	0.0723162	0.0723162	-0.0723162	0	0.0973515	0.0973515	-0.0973515	0	0.10407	0.10407	-0.10407
17.2165	17216.5	0	0.105324	0.105324	-0.105324	0	0.0722219	0.0722219	-0.0722219	0	0.0972081	0.0972081	-0.0972081	0	0.103916	0.103916	-0.103916
17.2265	17226.5	0	0.105184	0.105184	-0.105184	0	0.0721276	0.0721276	-0.0721276	0	0.0970647	0.0970647	-0.0970647	0	0.103763	0.103763	-0.103763
17.2365	17236.5	0	0.105043	0.105043	-0.105043	0	0.0720334	0.0720334	-0.0720334	0	0.0969214	0.0969214	-0.0969214	0	0.10361	0.10361	-0.10361
17.2465	17246.5	0	0.104903	0.104903	-0.104903	0	0.0719393	0.0719393	-0.0719393	0	0.0967783	0.0967783	-0.0967783	0	0.103457	0.103457	-0.103457
17.2565	17256.5	0	0.104762	0.104762	-0.104762	0	0.0718452	0.0718452	-0.0718452	0	0.0966353	0.0966353	-0.0966353	0	0.103304	0.103304	-0.103304
17.2665	17266.5	0	0.104622	0.104622	-0.104622	0	0.0717512	0.0717512	-0.0717512	0	0.0964923	0.0964923	-0.0964923	0	0.103152	0.103152	-0.103152
17.2765	17276.5	0	0.104482	0.104482	-0.104482	0	0.0716573	0.0716573	-0.0716573	0	0.0963495	0.0963495	-0.0963495	0	0.102999	0.102999	-0.102999
17.2865	17286.5	0	0.104342	0.104342	-0.104342	0	0.0715634	0.0715634	-0.0715634	0	0.0962068	0.0962068	-0.0962068	1	0.102847	0.102847	0.897153
17.2965	17296.5	0	0.104202	0.104202	-0.104202	0	0.0714696	0.0714696	-0.0714696	1	0.0960641	0.0960641	0.903936	0	0.102694	0.102694	-0.102694
17.3065	17306.5	0	0.104062	0.104062	-0.104062	0	0.0713758	0.0713758	-0.0713758	0	0.0959216	0.0959216	-0.0959216	0	0.102542	0.102542	-0.102542
17.3165	17316.5	0	0.103923	0.103923	-0.103923	0	0.0712821	0.0712821	-0.0712821	0	0.0957791	0.0957791	-0.0957791	1	0.10239	0.10239	0.89761
17.3265	17326.5	0	0.103783	0.103783	-0.103783	0	0.0711885	0.0711885	-0.0711885	0	0.0956368	0.0956368	-0.0956368	0	0.102237	0.102237	-0.102237
17.3365	17336.5	0	0.103643	0.103643	-0.103643	0	0.0710949	0.0710949	-0.0710949	0	0.0954944	0.0954944	-0.0954944	0	0.102086	0.102086	-0.102086
17.3465	17346.5	0	0.103504	0.103504	-0.103504	0	0.0710014	0.0710014	-0.0710014	0	0.0953524	0.0953524	-0.0953524	0	0.101934	0.101934	-0.101934
17.3565	17356.5	0	0.103364	0.103364	-0.103364	1	0.0709079	0.0709079	0.929092	0	0.0952103	0.0952103	-0.0952103	0	0.101782	0.101782	-0.101782
17.3665	17366.5	0	0.103225	0.103225	-0.103225	1	0.0708146	0.0708146	0.929185	0	0.0950683	0.0950683	-0.0950683	0	0.10163	0.10163	-0.10163
17.3765	17376.5	0	0.103086	0.103086	-0.103086	0	0.0707212	0.0707212	-0.0707212	0	0.0949265	0.0949265	-0.0949265	0	0.101479	0.101479	-0.101479
17.3865	17386.5	0	0.102947	0.102947	-0.102947	0	0.070628	0.070628	-0.070628	0	0.0947847	0.0947847	-0.0947847	0	0.101327	0.101327	-0.101327
17.3965	17396.5	1	0.102808	0.102808	0.897192	0	0.0705348	0.0705348	-0.0705348	1	0.0946431	0.0946431	0.905357	0	0.101176	0.101176	-0.101176
17.4065	17406.5	0	0.102669	0.102669	-0.102669	0	0.0704416	0.0704416	-0.0704416	0	0.0945015	0.0945015	-0.0945015	1	0.101025	0.101025	0.898975
17.4165	17416.5	0	0.10253	0.10253	-0.10253	0	0.0703486	0.0703486	-0.0703486	0	0.0943601	0.0943601	-0.0943601	0	0.100874	0.100874	-0.100874
17.4265	17426.5	0	0.102391	0.102391	-0.102391	0	0.0702555	0.0702555	-0.0702555	0	0.0942187	0.0942187	-0.0942187	0	0.100722	0.100722	-0.100722
17.4365	17436.5	0	0.102253	0.102253	-0.102253	0	0.0701626	0.0701626	-0.0701626	0	0.0940774	0.0940774	-0.0940774	0	0.100571	0.100571	-0.100571
17.4465	17446.5	0	0.102114	0.102114	-0.102114	0	0.0700697	0.0700697	-0.0700697	0	0.0939363	0.0939363	-0.0939363	0	0.100421	0.100421	-0.100421
17.4565	17456.5	0	0.101976	0.101976	-0.101976	0	0.0699769	0.0699769	-0.0699769	0	0.0937952	0.0937952	-0.0937952	0	0.10027	0.10027	-0.10027
17.4665	17466.5	0	0.101837	0.101837	-0.101837	0	0.0698841	0.0698841	-0.0698841	0	0.0936542	0.0936542	-0.0936542	0	0.100119	0.100119	-0.100119
17.4765	17476.5	0	0.101699	0.101699	-0.101699	0	0.0697914	0.0697914	-0.0697914	0	0.0935134	0.0935134	-0.0935134	0	0.0999687	0.0999687	-0.0999687
17.4865	17486.5	0	0.101561	0.101561	-0.101561	0	0.0696988	0.0696988	-0.0696988	0	0.0933726	0.0933726	-0.0933726	0	0.0998184	0.0998184	-0.0998184
17.4965	17496.5	1	0.101423	0.101423	0.898577	0	0.0696062	0.0696062	-0.0696062	0	0.0932319	0.0932319	-0.0932319	0	0.0996681	0.0996681	-0.0996681
17.5065	17506.5	0	0.101285	0.101285	-0.101285	0	0.0695137	0.0695137	-0.0695137	0	0.0930914	0.0930914	-0.0930914	0	0.0995179	0.0995179	-0.0995179
17.5165	17516.5	0	0.101147	0.101147	-0.101147	0	0.0694212	0.0694212	-0.0694212	0	0.0929509	0.0929509	-0.0929509	0	0.0993678	0.0993678	-0.0993678
17.5265	17526.5	0	0.101009	0.101009	-0.101009	0	0.0693288	0.0693288	-0.0693288	0	0.0928105	0.0928105	-0.0928105	0	0.0992178	0.0992178	-0.0992178
17.5365	17536.5	0	0.100872	0.100872	-0.100872	0	0.0692365	0.0692365	-0.0692365	0	0.0926703	0.0926703	-0.0926703	0	0.0990679	0.0990679	-0.0990679
17.5465	17546.5	0	0.100734	0.100734	-0.100734	0	0.0691443	0.0691443	-0.0691443	0	0.0925301	0.0925301	-0.0925301	1	0.0989181	0.0989181	0.901082
17.5565	17556.5	0	0.100596	0.100596	-0.100596	0	0.069052	0.069052	-0.069052	0	0.09239	0.09239	-0.09239	0	0.0987684	0.0987684	-0.0987684
17.5665	17566.5	0	0.100459	0.100459	-0.100459	0	0.0689599	0.0689599	-0.0689599	0	0.0922501	0.0922501	-0.0922501	0	0.0986188	0.0986188	-0.0986188
17.5765	17576.5	1	0.100322	0.100322	0.899678	0	0.0688678	0.0688678	-0.0688678	0	0.0921102	0.0921102	-0.0921102	0	0.0984694	0.0984694	-0.0984694
17.5865	17586.5	0	0.100184	0.100184	-0.100184	0	0.0687758	0.0687758	-0.0687758	0	0.0919704	0.0919704	-0.0919704	0	0.09832	0.09832	-0.09832
17.5965	17596.5	0	0.100047	0.100047	-0.100047	0	0.0686839	0.0686839	-0.0686839	0	0.0918307	0.0918307	-0.0918307	1	0.0981708	0.0981708	0.901829
17.6065	17606.5	0	0.0999101	0.0999101	-0.0999101	0	0.068592	0.068592	-0.068592	0	0.0916912	0.0916912	-0.0916912	0	0.0980216	0.0980216	-0.0980216
17.6165	17616.5	0	0.0997732	0.0997732	-0.0997732	0	0.0685002	0.0685002	-0.0685002	0	0.0915517	0.0915517	-0.0915517	0	0.0978726	0.0978726	-0.0978726
17.6265	17626.5	0	0.0996363	0.0996363	-0.0996363	1	0.0684084	0.0684084	0.931592	0	0.0914123	0.0914123	-0.0914123	0	0.0977237	0.0977237	-0.0977237
17.6365	17636.5	0	0.0994995	0.0994995	-0.0994995	0	0.0683167	0.0683167	-0.0683167	0	0.0912731	0.0912731	-0.0912731	1	0.0975748	0.0975748	0.902425
17.6465	17646.5	0	0.0993628	0.0993628	-0.0993628	0	0.068225	0.068225	-0.068225	0	0.0911339	0.0911339	-0.0911339	0	0.0974261	0.0974261	-0.0974261
17.6565	17656.5	0	0.0992262	0.0992262	-0.0992262	0	0.0681335	0.0681335	-0.0681335	0	0.0909948	0.0909948	-0.0909948	0	0.0972774	0.0972774	-0.0972774
17.6665	17666.5	0	0.0990897	0.0990897	-0.0990897	0	0.068042	0.068042	-0.068042	0	0.0908558	0.0908558	-0.0908558	0	0.0971289	0.0971289	-0.0971289
17.6765	17676.5	0	0.0989533	0.0989533	-0.0989533	0	0.0679505	0.0679505	-0.0679505	0	0.090717	0.090717	-0.090717	1	0.0969804	0.0969804	0.903019
17.6865	17686.5	1	0.0988169	0.0988169	0.901183	0	0.0678591	0.0678591	-0.0678591	0	0.0905781	0.0905781	-0.0905781	0	0.0968322	0.0968322	-0.0968322
17.6965	17696.5	0	0.0986807	0.0986807	-0.0986807	0	0.0677678	0.0677678	-0.0677678	1	0.0904394	0.0904394	0.909561	0	0.096684	0.096684	-0.096684
17.7065	17706.5	0	0.0985446	0.0985446	-0.0985446	0	0.0676765	0.0676765	-0.0676765	0	0.0903009	0.0903009	-0.0903009	0	0.0965359	0.0965359	-0.0965359
17.7165	17716.5	0	0.0984085	0.0984085	-0.0984085	0	0.0675853	0.0675853	-0.0675853	0	0.0901624	0.0901624	-0.0901624	0	0.0963879	0.0963879	-0.0963879
17.7265	17726.5	0	0.0982726	0.0982726	-0.0982726	0	0.0674942	0.0674942	-0.0674942	0	0.090024	0.090024	-0.090024	0	0.09624	0.09624	-0.09624
17.7365	17736.5	0	0.0981367	0.0981367	-0.0981367	0	0.0674031	0.0674031	-0.0674031	0	0.0898858	0.0898858	-0.0898858	0	0.0960922	0.0960922	-0.0960922
17.7465	17746.5	0	0.0980009	0.0980009	-0.0980009	0	0.0673121	0.0673121	-0.0673121	0	0.0897475	0.0897475	-0.0897475	0	0.0959445	0.0959445	-0.0959445
17.7565	17756.5	0	0.0978653	0.0978653	-0.0978653	0	0.0672211	0.0672211	-0.0672211	0	0.0896094	0.0896094	-0.0896094	0	0.0957969	0.0957969	-0.0957969
17.7665	17766.5	0	0.0977296	0.0977296	-0.0977296	0	0.0671302	0.0671302	-0.0671302	1	0.0894715	0.0894715	0.910528	0	0.0956495	0.0956495	-0.0956495
17.7765	17776.5	0	0.0975941	0.0975941	-0.0975941	0	0.0670394	0.0670394	-0.0670394	0	0.0893335	0.0893335	-0.0893335	0	0.0955021	0.0955021	-0.0955021
17.7865	17786.5	0	0.0974587	0.0974587	-0.0974587	0	0.0669486	0.0669486	-0.0669486	0	0.0891958	0.0891958	-0.0891958	0	0.0953548	0.0953548	-0.0953548
17.7965	17796.5	0	0.0973234	0.0973234	-0.0973234	0	0.0668579	0.0668579	-0.0668579	0	0.0890581	0.0890581	-0.0890581	0	0.0952077	0.0952077	-0.0952077
17.8065	17806.5	0	0.0971882	0.0971882	-0.0971882	0	0.0667673	0.0667673	-0.0667673	0	0.0889205	0.0889205	-0.0889205	0	0.0950607	0.0950607	-0.0950607
17.8165	17816.5	0	0.0970531	0.0970531	-0.0970531	0	0.0666767	0.0666767	-0.0666767	0	0.088783	0.088783	-0.088783	0	0.0949137	0.0949137	-0.0949137
17.8265	17826.5	0	0.0969181	0.0969181	-0.0969181	1	0.0665862	0.0665862	0.933414	0	0.0886456	0.0886456	-0.0886456	0	0.0947669	0.0947669	-0.0947669
17.8365	17836.5	0	0.0967831	0.0967831	-0.0967831	0	0.0664958	0.0664958	-0.0664958	0	0.0885084	0.0885084	-0.0885084	0	0.0946201	0.0946201	-0.0946201
17.8465	17846.5	0	0.0966483	0.0966483	-0.0966483	0	0.0664054	0.0664054	-0.0664054	0	0.0883712	0.0883712	-0.0883712	0	0.0944735	0.0944735	-0.0944735
17.8565	17856.5	0	0.0965135	0.0965135	-0.0965135	0	0.066315	0.066315	-0.066315	0	0.0882341	0.0882341	-0.0882341	0	0.094327	0.094327	-0.094327
17.8665	17866.5	0	0.0963788	0.0963788	-0.0963788	0	0.0662247	0.0662247	-0.0662247	1	0.0880971	0.0880971	0.911903	2	0.0941805	0.0941805	1.90582
17.8765	17876.5	0	0.0962442	0.0962442	-0.0962442	0	0.0661346	0.0661346	-0.0661346	1	0.0879601	0.0879601	0.91204	0	0.0940342	0.0940342	-0.0940342
17.8865	17886.5	0	0.0961097	0.0961097	-0.0961097	0	0.0660444	0.0660444	-0.0660444	0	0.0878233	0.0878233	-0.0878233	0	0.093888	0.093888	-0.093888
17.8965	17896.5	0	0.0959753	0.0959753	-0.0959753	0	0.0659543	0.0659543	-0.0659543	0	0.0876867	0.0876867	-0.0876867	0	0.0937419	0.0937419	-0.0937419
17.9065	17906.5	0	0.095841	0.095841	-0.095841	1	0.0658643	0.0658643	0.934136	0	0.08755	0.08755	-0.08755	0	0.0935959	0.0935959	-0.0935959
17.9165	17916.5	0	0.0957069	0.0957069	-0.0957069	0	0.0657743	0.0657743	-0.0657743	0	0.0874136	0.0874136	-0.0874136	0	0.0934501	0.0934501	-0.0934501
17.9265	17926.5	0	0.0955728	0.0955728	-0.0955728	0	0.0656845	0.0656845	-0.0656845	0	0.0872772	0.0872772	-0.0872772	0	0.0933042	0.0933042	-0.0933042
17.9365	17936.5	0	0.0954387	0.0954387	-0.0954387	0	0.0655946	0.0655946	-0.0655946	0	0.0871409	0.0871409	-0.0871409	0	0.0931586	0.0931586	-0.0931586
17.9465	17946.5	0	0.0953048	0.0953048	-0.0953048	0	0.0655049	0.0655049	-0.0655049	0	0.0870047	0.0870047	-0.0870047	0	0.093013	0.093013	-0.093013
17.9565	17956.5	0	0.095171	0.095171	-0.095171	0	0.0654152	0.0654152	-0.0654152	0	0.0868686	0.0868686	-0.0868686	1	0.0928675	0.0928675	0.907133
17.9665	17966.5	0	0.0950372	0.0950372	-0.0950372	0	0.0653255	0.0653255	-0.0653255	0	0.0867326	0.0867326	-0.0867326	0	0.0927221	0.0927221	-0.0927221
17.9765	17976.5	0	0.0949036	0.0949036	-0.0949036	0	0.0652359	0.0652359	-0.0652359	1	0.0865967	0.0865967	0.913403	0	0.0925769	0.0925769	-0.0925769
17.9865	17986.5	0	0.09477	0.09477	-0.09477	0	0.0651464	0.0651464	-0.0651464	0	0.0864608	0.0864608	-0.0864608	0	0.0924317	0.0924317	-0.0924317
17.9965	17996.5	0	0.0946365	0.0946365	-0.0946365	0	0.065057	0.065057	-0.065057	0	0.0863252	0.0863252	-0.0863252	0	0.0922866	0.0922866	-0.0922866
18.0065	18006.5	0	0.0945032	0.0945032	-0.0945032	0	0.0649676	0.0649676	-0.0649676	0	0.0861895	0.0861895	-0.0861895	0	0.0921417	0.0921417	-0.0921417
18.0165	18016.5	1	0.0943699	0.0943699	0.90563	0	0.0648782	0.0648782	-0.0648782	0	0.086054	0.086054	-0.086054	1	0.0919969	0.0919969	0.908003
18.0265	18026.5	0	0.0942367	0.0942367	-0.0942367	0	0.064789	0.064789	-0.064789	0	0.0859187	0.0859187	-0.0859187	0	0.0918521	0.0918521	-0.0918521
18.0365	18036.5	0	0.0941036	0.0941036	-0.0941036	1	0.0646998	0.0646998	0.9353	0	0.0857833	0.0857833	-0.0857833	0	0.0917075	0.0917075	-0.0917075
18.0465	18046.5	0	0.0939705	0.0939705	-0.0939705	0	0.0646106	0.0646106	-0.0646106	0	0.0856481	0.0856481	-0.0856481	0	0.0915629	0.0915629	-0.0915629
18.0565	18056.5	0	0.0938377	0.0938377	-0.0938377	0	0.0645215	0.0645215	-0.0645215	0	0.085513	0.085513	-0.085513	0	0.0914185	0.0914185	-0.0914185
18.0665	18066.5	0	0.0937049	0.0937049	-0.0937049	0	0.0644325	0.0644325	-0.0644325	0	0.0853779	0.0853779	-0.0853779	0	0.0912742	0.0912742	-0.0912742
18.0765	18076.5	0	0.0935721	0.0935721	-0.0935721	0	0.0643436	0.0643436	-0.0643436	0	0.0852431	0.0852431	-0.0852431	0	0.09113	0.09113	-0.09113
18.0865	18086.5	0	0.0934395	0.0934395	-0.0934395	0	0.0642547	0.0642547	-0.0642547	0	0.0851083	0.0851083	-0.0851083	0	0.0909859	0.0909859	-0.0909859
18.0965	18096.5	0	0.093307	0.093307	-0.093307	0	0.0641658	0.0641658	-0.0641658	0	0.0849735	0.0849735	-0.0849735	0	0.0908419	0.0908419	-0.0908419
18.1065	18106.5	0	0.0931745	0.0931745	-0.0931745	0	0.0640771	0.0640771	-0.0640771	0	0.0848389	0.0848389	-0.0848389	1	0.090698	0.090698	0.909302
18.1165	18116.5	0	0.0930421	0.0930421	-0.0930421	0	0.0639884	0.0639884	-0.0639884	0	0.0847044	0.0847044	-0.0847044	0	0.0905542	0.0905542	-0.0905542
18.1265	18126.5	0	0.0929098	0.0929098	-0.0929098	0	0.0638997	0.0638997	-0.0638997	0	0.08457	0.08457	-0.08457	0	0.0904105	0.0904105	-0.0904105
18.1365	18136.5	0	0.0927777	0.0927777	-0.0927777	0	0.0638111	0.0638111	-0.0638111	0	0.0844356	0.0844356	-0.0844356	0	0.0902669	0.0902669	-0.0902669
18.1465	18146.5	0	0.0926456	0.0926456	-0.0926456	0	0.0637226	0.0637226	-0.0637226	0	0.0843015	0.0843015	-0.0843015	0	0.0901234	0.0901234	-0.0901234
18.1565	18156.5	0	0.0925136	0.0925136	-0.0925136	1	0.0636342	0.0636342	0.936366	0	0.0841674	0.0841674	-0.0841674	0	0.0899801	0.0899801	-0.0899801
18.1665	18166.5	0	0.0923817	0.0923817	-0.0923817	0	0.0635458	0.0635458	-0.0635458	0	0.0840333	0.0840333	-0.0840333	0	0.0898368	0.0898368	-0.0898368
18.1765	18176.5	0	0.0922499	0.0922499	-0.0922499	0	0.0634574	0.0634574	-0.0634574	0	0.0838994	0.0838994	-0.0838994	0	0.0896936	0.0896936	-0.0896936
18.1865	18186.5	0	0.0921182	0.0921182	-0.0921182	0	0.0633691	0.0633691	-0.0633691	0	0.0837656	0.0837656	-0.0837656	0	0.0895506	0.0895506	-0.0895506
18.1965	18196.5	0	0.0919866	0.0919866	-0.0919866	0	0.0632809	0.0632809	-0.0632809	0	0.0836318	0.0836318	-0.0836318	0	0.0894076	0.0894076	-0.0894076
18.2065	18206.5	0	0.091855	0.091855	-0.091855	0	0.0631928	0.0631928	-0.0631928	0	0.0834982	0.0834982	-0.0834982	0	0.0892648	0.0892648	-0.0892648
18.2165	18216.5	0	0.0917236	0.0917236	-0.0917236	0	0.0631047	0.0631047	-0.0631047	0	0.0833647	0.0833647	-0.0833647	0	0.089122	0.089122	-0.089122
18.2265	18226.5	1	0.0915923	0.0915923	0.908408	0	0.0630167	0.0630167	-0.0630167	0	0.0832313	0.0832313	-0.0832313	0	0.0889794	0.0889794	-0.0889794
18.2365	18236.5	0	0.091461	0.091461	-0.091461	0	0.0629287	0.0629287	-0.0629287	0	0.0830979	0.0830979	-0.0830979	0	0.0888368	0.0888368	-0.0888368
18.2465	18246.5	1	0.0913298	0.0913298	0.90867	0	0.0628409	0.0628409	-0.0628409	0	0.0829648	0.0829648	-0.0829648	0	0.0886944	0.0886944	-0.0886944
18.2565	18256.5	1	0.0911987	0.0911987	0.908801	0	0.062753	0.062753	-0.062753	0	0.0828316	0.0828316	-0.0828316	0	0.0885521	0.0885521	-0.0885521
18.2665	18266.5	0	0.0910678	0.0910678	-0.0910678	0	0.0626652	0.0626652	-0.0626652	0	0.0826986	0.0826986	-0.0826986	0	0.0884099	0.0884099	-0.0884099
18.2765	18276.5	0	0.0909369	0.0909369	-0.0909369	0	0.0625775	0.0625775	-0.0625775	0	0.0825657	0.0825657	-0.0825657	0	0.0882677	0.0882677	-0.0882677
18.2865	18286.5	0	0.0908061	0.0908061	-0.0908061	0	0.0624899	0.0624899	-0.0624899	0	0.0824328	0.0824328	-0.0824328	0	0.0881258	0.0881258	-0.0881258
18.2965	18296.5	0	0.0906754	0.0906754	-0.0906754	0	0.0624023	0.0624023	-0.0624023	0	0.0823001	0.0823001	-0.0823001	0	0.0879838	0.0879838	-0.0879838
18.3065	18306.5	0	0.0905448	0.0905448	-0.0905448	0	0.0623148	0.0623148	-0.0623148	0	0.0821675	0.0821675	-0.0821675	0	0.0878421	0.0878421	-0.0878421
18.3165	18316.5	0	0.0904143	0.0904143	-0.0904143	0	0.0622273	0.0622273	-0.0622273	0	0.0820349	0.0820349	-0.0820349	0	0.0877004	0.0877004	-0.0877004
18.3265	18326.5	0	0.0902839	0.0902839	-0.0902839	0	0.0621399	0.0621399	-0.0621399	0	0.0819024	0.0819024	-0.0819024	1	0.0875588	0.0875588	0.912441
18.3365	18336.5	0	0.0901535	0.0901535	-0.0901535	0	0.0620526	0.0620526	-0.0620526	0	0.0817702	0.0817702	-0.0817702	0	0.0874173	0.0874173	-0.0874173
18.3465	18346.5	0	0.0900233	0.0900233	-0.0900233	0	0.0619653	0.0619653	-0.0619653	0	0.0816379	0.0816379	-0.0816379	0	0.0872759	0.0872759	-0.0872759
18.3565	18356.5	0	0.0898932	0.0898932	-0.0898932	0	0.0618781	0.0618781	-0.0618781	1	0.0815058	0.0815058	0.918494	0	0.0871347	0.0871347	-0.0871347
18.3665	18366.5	0	0.0897631	0.0897631	-0.0897631	0	0.0617909	0.0617909	-0.0617909	0	0.0813737	0.0813737	-0.0813737	0	0.0869935	0.0869935	-0.0869935
18.3765	18376.5	0	0.0896331	0.0896331	-0.0896331	0	0.0617039	0.0617039	-0.0617039	0	0.0812418	0.0812418	-0.0812418	0	0.0868524	0.0868524	-0.0868524
18.3865	18386.5	1	0.0895032	0.0895032	0.910497	0	0.0616168	0.0616168	-0.0616168	1	0.0811099	0.0811099	0.91889	0	0.0867114	0.0867114	-0.0867114
18.3965	18396.5	0	0.0893735	0.0893735	-0.0893735	0	0.0615299	0.0615299	-0.0615299	0	0.0809782	0.0809782	-0.0809782	0	0.0865706	0.0865706	-0.0865706
18.4065	18406.5	0	0.0892438	0.0892438	-0.0892438	0	0.061443	0.061443	-0.061443	0	0.0808466	0.0808466	-0.0808466	1	0.0864299	0.0864299	0.91357
18.4165	18416.5	0	0.0891142	0.0891142	-0.0891142	0	0.0613562	0.0613562	-0.0613562	0	0.080715	0.080715	-0.080715	0	0.0862892	0.0862892	-0.0862892
18.4265	18426.5	0	0.0889847	0.0889847	-0.0889847	0	0.0612694	0.0612694	-0.0612694	1	0.0805836	0.0805836	0.919416	0	0.0861487	0.0861487	-0.0861487
18.4365	18436.5	0	0.0888553	0.0888553	-0.0888553	0	0.0611827	0.0611827	-0.0611827	0	0.0804523	0.0804523	-0.0804523	0	0.0860082	0.0860082	-0.0860082
18.4465	18446.5	0	0.088726	0.088726	-0.088726	0	0.061096	0.061096	-0.061096	0	0.080321	0.080321	-0.080321	0	0.0858679	0.0858679	-0.0858679
18.4565	18456.5	0	0.0885968	0.0885968	-0.0885968	0	0.0610094	0.0610094	-0.0610094	0	0.0801899	0.0801899	-0.0801899	0	0.0857277	0.0857277	-0.0857277
18.4665	18466.5	0	0.0884676	0.0884676	-0.0884676	0	0.0609229	0.0609229	-0.0609229	0	0.0800589	0.0800589	-0.0800589	1	0.0855876	0.0855876	0.914412
18.4765	18476.5	0	0.0883386	0.0883386	-0.0883386	0	0.0608364	0.0608364	-0.0608364	0	0.0799279	0.0799279	-0.0799279	0	0.0854475	0.0854475	-0.0854475
18.4865	18486.5	0	0.0882096	0.0882096	-0.0882096	0	0.0607501	0.0607501	-0.0607501	0	0.079797	0.079797	-0.079797	0	0.0853077	0.0853077	-0.0853077
18.4965	18496.5	0	0.0880808	0.0880808	-0.0880808	0	0.0606637	0.0606637	-0.0606637	0	0.0796663	0.0796663	-0.0796663	0	0.0851678	0.0851678	-0.0851678
18.5065	18506.5	0	0.087952	0.087952	-0.087952	0	0.0605774	0.0605774	-0.0605774	0	0.0795357	0.0795357	-0.0795357	0	0.0850282	0.0850282	-0.0850282
18.5165	18516.5	0	0.0878233	0.0878233	-0.0878233	0	0.0604912	0.0604912	-0.0604912	0	0.0794051	0.0794051	-0.0794051	0	0.0848886	0.0848886	-0.0848886
18.5265	18526.5	0	0.0876948	0.0876948	-0.0876948	0	0.0604051	0.0604051	-0.0604051	0	0.0792747	0.0792747	-0.0792747	0	0.084749	0.084749	-0.084749
18.5365	18536.5	0	0.0875663	0.0875663	-0.0875663	0	0.060319	0.060319	-0.060319	0	0.0791444	0.0791444	-0.0791444	0	0.0846097	0.0846097	-0.0846097
18.5465	18546.5	0	0.0874379	0.0874379	-0.0874379	0	0.060233	0.060233	-0.060233	0	0.079014	0.079014	-0.079014	0	0.0844704	0.0844704	-0.0844704
18.5565	18556.5	0	0.0873095	0.0873095	-0.0873095	0	0.060147	0.060147	-0.060147	0	0.0788839	0.0788839	-0.0788839	0	0.0843313	0.0843313	-0.0843313
18.5665	18566.5	0	0.0871814	0.0871814	-0.0871814	0	0.0600611	0.0600611	-0.0600611	1	0.0787539	0.0787539	0.921246	0	0.0841922	0.0841922	-0.0841922
18.5765	18576.5	0	0.0870532	0.0870532	-0.0870532	0	0.0599753	0.0599753	-0.0599753	0	0.0786239	0.0786239	-0.0786239	0	0.0840532	0.0840532	-0.0840532
18.5865	18586.5	1	0.0869253	0.0869253	0.913075	0	0.0598895	0.0598895	-0.0598895	0	0.078494	0.078494	-0.078494	0	0.0839143	0.0839143	-0.0839143
18.5965	18596.5	0	0.0867973	0.0867973	-0.0867973	0	0.0598038	0.0598038	-0.0598038	0	0.0783643	0.0783643	-0.0783643	0	0.0837756	0.0837756	-0.0837756
18.6065	18606.5	0	0.0866694	0.0866694	-0.0866694	0	0.0597181	0.0597181	-0.0597181	0	0.0782346	0.0782346	-0.0782346	0	0.083637	0.083637	-0.083637
18.6165	18616.5	0	0.0865417	0.0865417	-0.0865417	0	0.0596325	0.0596325	-0.0596325	0	0.078105	0.078105	-0.078105	0	0.0834984	0.0834984	-0.0834984
18.6265	18626.5	0	0.0864141	0.0864141	-0.0864141	0	0.059547	0.059547	-0.059547	0	0.0779756	0.0779756	-0.0779756	0	0.08336	0.08336	-0.08336
18.6365	18636.5	0	0.0862865	0.0862865	-0.0862865	0	0.0594616	0.0594616	-0.0594616	0	0.0778463	0.0778463	-0.0778463	0	0.0832216	0.0832216	-0.0832216
18.6465	18646.5	0	0.086159	0.086159	-0.086159	0	0.0593762	0.0593762	-0.0593762	0	0.077717	0.077717	-0.077717	0	0.0830835	0.0830835	-0.0830835
18.6565	18656.5	0	0.0860317	0.0860317	-0.0860317	0	0.0592908	0.0592908	-0.0592908	0	0.0775878	0.0775878	-0.0775878	0	0.0829453	0.0829453	-0.0829453
18.6665	18666.5	0	0.0859044	0.0859044	-0.0859044	0	0.0592055	0.0592055	-0.0592055	0	0.0774588	0.0774588	-0.0774588	0	0.0828073	0.0828073	-0.0828073
18.6765	18676.5	0	0.0857772	0.0857772	-0.0857772	0	0.0591203	0.0591203	-0.0591203	0	0.0773298	0.0773298	-0.0773298	1	0.0826694	0.0826694	0.917331
18.6865	18686.5	0	0.08565	0.08565	-0.08565	0	0.0590352	0.0590352	-0.0590352	0	0.077201	0.077201	-0.077201	0	0.0825316	0.0825316	-0.0825316
18.6965	18696.5	0	0.0855231	0.0855231	-0.0855231	0	0.0589501	0.0589501	-0.0589501	0	0.0770722	0.0770722	-0.0770722	0	0.0823938	0.0823938	-0.0823938
18.7065	18706.5	0	0.0853961	0.0853961	-0.0853961	0	0.0588651	0.0588651	-0.0588651	0	0.0769435	0.0769435	-0.0769435	0	0.0822563	0.0822563	-0.0822563
18.7165	18716.5	0	0.0852693	0.0852693	-0.0852693	0	0.0587801	0.0587801	-0.0587801	0	0.076815	0.076815	-0.076815	0	0.0821188	0.0821188	-0.0821188
18.7265	18726.5	0	0.0851425	0.0851425	-0.0851425	0	0.0586952	0.0586952	-0.0586952	1	0.0766865	0.0766865	0.923314	0	0.0819814	0.0819814	-0.0819814
18.7365	18736.5	0	0.085016	0.085016	-0.085016	0	0.0586104	0.0586104	-0.0586104	0	0.0765581	0.0765581	-0.0765581	0	0.0818441	0.0818441	-0.0818441
18.7465	18746.5	0	0.0848894	0.0848894	-0.0848894	0	0.0585256	0.0585256	-0.0585256	0	0.0764298	0.0764298	-0.0764298	0	0.0817069	0.0817069	-0.0817069
18.7565	18756.5	0	0.0847629	0.0847629	-0.0847629	0	0.0584408	0.0584408	-0.0584408	0	0.0763017	0.0763017	-0.0763017	0	0.0815698	0.0815698	-0.0815698
18.7665	18766.5	1	0.0846366	0.0846366	0.915363	0	0.0583562	0.0583562	-0.0583562	0	0.0761736	0.0761736	-0.0761736	2	0.0814329	0.0814329	1.91857
18.7765	18776.5	0	0.0845103	0.0845103	-0.0845103	0	0.0582716	0.0582716	-0.0582716	0	0.0760456	0.0760456	-0.0760456	0	0.081296	0.081296	-0.081296
18.7865	18786.5	0	0.0843841	0.0843841	-0.0843841	0	0.0581871	0.0581871	-0.0581871	0	0.0759178	0.0759178	-0.0759178	0	0.0811592	0.0811592	-0.0811592
18.7965	18796.5	0	0.084258	0.084258	-0.084258	0	0.0581026	0.0581026	-0.0581026	0	0.07579	0.07579	-0.07579	0	0.0810226	0.0810226	-0.0810226
18.8065	18806.5	0	0.0841321	0.0841321	-0.0841321	0	0.0580182	0.0580182	-0.0580182	0	0.0756623	0.0756623	-0.0756623	0	0.0808861	0.0808861	-0.0808861
18.8165	18816.5	0	0.0840061	0.0840061	-0.0840061	0	0.0579339	0.0579339	-0.0579339	0	0.0755348	0.0755348	-0.0755348	0	0.0807496	0.0807496	-0.0807496
18.8265	18826.5	0	0.0838803	0.0838803	-0.0838803	0	0.0578496	0.0578496	-0.0578496	0	0.0754073	0.0754073	-0.0754073	0	0.0806133	0.0806133	-0.0806133
18.8365	18836.5	0	0.0837547	0.0837547	-0.0837547	0	0.0577654	0.0577654	-0.0577654	0	0.0752799	0.0752799	-0.0752799	0	0.0804771	0.0804771	-0.0804771
18.8465	18846.5	1	0.083629	0.083629	0.916371	0	0.0576812	0.0576812	-0.0576812	0	0.0751526	0.0751526	-0.0751526	0	0.080341	0.080341	-0.080341
18.8565	18856.5	0	0.0835035	0.0835035	-0.0835035	0	0.0575971	0.0575971	-0.0575971	0	0.0750255	0.0750255	-0.0750255	1	0.0802049	0.0802049	0.919795
18.8665	18866.5	0	0.083378	0.083378	-0.083378	0	0.0575131	0.0575131	-0.0575131	0	0.0748984	0.0748984	-0.0748984	0	0.080069	0.080069	-0.080069
18.8765	18876.5	0	0.0832527	0.0832527	-0.0832527	0	0.0574291	0.0574291	-0.0574291	0	0.0747714	0.0747714	-0.0747714	0	0.0799332	0.0799332	-0.0799332
18.8865	18886.5	0	0.0831274	0.0831274	-0.0831274	0	0.0573452	0.0573452	-0.0573452	0	0.0746446	0.0746446	-0.0746446	0	0.0797975	0.0797975	-0.0797975
18.8965	18896.5	0	0.0830023	0.0830023	-0.0830023	0	0.0572614	0.0572614	-0.0572614	0	0.0745177	0.0745177	-0.0745177	0	0.0796619	0.0796619	-0.0796619
18.9065	18906.5	1	0.0828772	0.0828772	0.917123	0	0.0571776	0.0571776	-0.0571776	0	0.0743911	0.0743911	-0.0743911	0	0.0795264	0.0795264	-0.0795264
18.9165	18916.5	1	0.0827522	0.0827522	0.917248	0	0.0570939	0.0570939	-0.0570939	0	0.0742645	0.0742645	-0.0742645	0	0.079391	0.079391	-0.079391
18.9265	18926.5	0	0.0826273	0.0826273	-0.0826273	1	0.0570103	0.0570103	0.94299	0	0.074138	0.074138	-0.074138	0	0.0792557	0.0792557	-0.0792557
18.9365	18936.5	0	0.0825025	0.0825025	-0.0825025	0	0.0569267	0.0569267	-0.0569267	0	0.0740116	0.0740116	-0.0740116	0	0.0791206	0.0791206	-0.0791206
18.9465	18946.5	0	0.0823778	0.0823778	-0.0823778	0	0.0568431	0.0568431	-0.0568431	0	0.0738853	0.0738853	-0.0738853	0	0.0789854	0.0789854	-0.0789854
18.9565	18956.5	0	0.0822532	0.0822532	-0.0822532	0	0.0567597	0.0567597	-0.0567597	1	0.0737592	0.0737592	0.926241	0	0.0788505	0.0788505	-0.0788505
18.9665	18966.5	0	0.0821287	0.0821287	-0.0821287	1	0.0566763	0.0566763	0.943324	0	0.0736331	0.0736331	-0.0736331	0	0.0787156	0.0787156	-0.0787156
18.9765	18976.5	1	0.0820043	0.0820043	0.917996	0	0.0565929	0.0565929	-0.0565929	0	0.0735071	0.0735071	-0.0735071	0	0.0785809	0.0785809	-0.0785809
18.9865	18986.5	0	0.08188	0.08188	-0.08188	0	0.0565096	0.0565096	-0.0565096	0	0.0733812	0.0733812	-0.0733812	0	0.0784462	0.0784462	-0.0784462
18.9965	18996.5	0	0.0817557	0.0817557	-0.0817557	0	0.0564264	0.0564264	-0.0564264	0	0.0732554	0.0732554	-0.0732554	0	0.0783117	0.0783117	-0.0783117
[truncated: 2,100 more rows]

## Sheet: Supplementary Table3
Sample ID		T7		Mineral species		Saturation Index
Temperature	C	27.7		Analcime	log Q/K	-3.876
pH		11.16		Merlinoite(K)	log Q/K	-7.24
Eh	mV	-141		Merlinoite(Na)	log Q/K	-6.53
Na+	mg/kg	49.1		Chabazite	log Q/K	-3.396
K+	mg/kg	2.02		Phillipsite(Ca)	log Q/K	-3.708
Mg++	mg/kg	< 0.01		Saponite(Ca)	log Q/K	4.258
Fe++	mg/kg	0.02		Saponite(FeCa)	log Q/K	-0.7528
Al+++	mg/kg	0.18		Saponite(FeMg)	log Q/K	-0.7641
Ca++	mg/kg	26.8		Saponite(Mg)	log Q/K	4.245
H4SiO4(aq)	mg/kg (as Si)	4.27		Saponite(SapCa)	log Q/K	3.459
Cl-	mg/kg	28.6		Hsaponite(Ca)	log Q/K	7.132
SO4--	mg/kg	0.63		Hsaponite(FeCa)	log Q/K	2.122
HCO3-	mg/kg	8.9		Hsaponite(FeMg)	log Q/K	2.324
				Hsaponite(Mg)	log Q/K	7.333
				Nontronite(Ca)	log Q/K	-2.494
				Nontronite(Mg)	log Q/K	-2.507
				Nontronite(Nau2)	log Q/K	-1.873
				Hnontronite(Ca)	log Q/K	-0.6753
				Hnontronite(Mg)	log Q/K	-0.5053
				Montmorillonite(HcCa)	log Q/K	-3.809
				Montmorillonite(HcK)	log Q/K	-2.998
				Montmorillonite(HcMg)	log Q/K	-3.888
				Montmorillonite(HcNa)	log Q/K	-3.026
				Montmorillonite(MgCa)	log Q/K	-6.066
				Montmorillonite(MgK)	log Q/K	-5.605
				Montmorillonite(MgMg)	log Q/K	-6.111
				Montmorillonite(MgNa)	log Q/K	-5.622
				Hmontmorillonite(HcCa)	log Q/K	-1.291
				Hmontmorillonite(HcK)	log Q/K	-2.22
				Hmontmorillonite(HcMg)	log Q/K	-0.7148
				Hmontmorillonite(HcNa)	log Q/K	-1.769
				Hmontmorillonite(MgCa)	log Q/K	-3.751
				Hmontmorillonite(MgK)	log Q/K	-4.859
				Hmontmorillonite(MgMg)	log Q/K	-3.191
				Hmontmorillonite(MgNa)	log Q/K	-4.427
				Saponite(FeK)	log Q/K	-0.5105
				Saponite(FeNa)	log Q/K	-0.4457
				Saponite(K)	log Q/K	5.064
				Saponite(Na)	log Q/K	5.07
				Hsaponite(FeK)	log Q/K	0.9584
				Hsaponite(FeNa)	log Q/K	1.53
				Hsaponite(K)	log Q/K	5.968
				Hsaponite(Na)	log Q/K	6.54
				Nontronite(K)	log Q/K	-2.254
				Nontronite(Na)	log Q/K	-2.19
				Hnontronite(K)	log Q/K	-1.965
				Hnontronite(Na)	log Q/K	-1.496

## Sheet: Supplementary Table4
Number	Sample	Area	Circ.	%Area	AR	Round	Solidity		Radius		Median Area [um^2]	Median radius [um]	Max Area [um^2]	Max radius [um]
1	C03_0065.tif	338.021	0.536	100	2.226	0.449	0.727		10.3728		295.768	9.70288	4385.82	37.3637
2	C03_0065.tif	312.669	0.948	100	1.426	0.701	0.914		9.97625
7	C03_0065.tif	152.109	0.487	100	3.243	0.308	0.706		6.95829
9	C03_0065.tif	152.109	0.17	100	3.975	0.252	0.429		6.95829
13	C03_0065.tif	1436.59	0.542	100	1.748	0.572	0.798		21.3841
14	C03_0065.tif	566.184	0.525	100	2.929	0.341	0.779		13.4247
16	C03_0065.tif	101.406	1	100	1.333	0.75	1		5.68142
17	C03_0065.tif	109.857	0.846	100	2.432	0.411	0.839		5.91342
18	C03_0065.tif	2374.59	0.544	100	2.29	0.437	0.852		27.4928
19	C03_0065.tif	295.768	0.367	100	4.716	0.212	0.737		9.70288
24	C03_0065.tif	380.273	0.374	100	1.993	0.502	0.732		11.002
25	C03_0065.tif	135.208	0.316	100	1.248	0.802	0.561		6.56034
37	C03_0065.tif	954.908	0.68	100	2.071	0.483	0.866		17.4344
39	C03_0065.tif	397.174	0.44	100	3.466	0.288	0.74		11.2439
41	C03_0065.tif	101.406	0.579	100	2.415	0.414	0.667		5.68142
48	C03_0065.tif	498.58	0.959	100	1.165	0.858	0.901		12.5977
54	C03_0065.tif	312.669	0.373	100	5.876	0.17	0.86		9.97625
55	C03_0065.tif	118.307	0.811	100	2.219	0.451	0.778		6.13663
60	C03_0065.tif	118.307	0.341	100	4.851	0.206	0.622		6.13663
61	C03_0065.tif	261.966	0.513	100	3.304	0.303	0.805		9.13161
66	C03_0065.tif	270.416	0.725	100	1.916	0.522	0.81		9.27772
68	C03_0065.tif	785.898	0.783	100	1.916	0.522	0.882		15.8164
69	C03_0065.tif	295.768	0.537	100	3.142	0.318	0.753		9.70288
70	C03_0065.tif	185.911	0.788	100	2.142	0.467	0.815		7.69268
72	C03_0065.tif	760.546	0.353	100	3.683	0.272	0.776		15.5592
74	C03_0065.tif	363.372	0.867	100	1.503	0.665	0.896		10.7548
78	C03_0065.tif	1123.92	0.58	100	2.521	0.397	0.839		18.9144
79	C03_0065.tif	447.877	0.813	100	1.751	0.571	0.848		11.94
80	C03_0065.tif	202.812	0.584	100	1.49	0.671	0.75		8.03474
87	C03_0065.tif	456.328	0.747	100	1.676	0.597	0.844		12.0521
88	C03_0065.tif	549.283	0.412	100	2.559	0.391	0.663		13.2228
90	C03_0065.tif	321.12	0.472	100	1.595	0.627	0.768		10.1102
92	C03_0065.tif	709.843	0.457	100	4.206	0.238	0.82		15.0316
94	C03_0065.tif	684.492	0.437	100	3.869	0.258	0.753		14.7608
99	C03_0065.tif	118.307	0.993	100	1.264	0.791	0.848		6.13663
100	C03_0065.tif	126.758	0.898	100	1.869	0.535	0.909		6.35203
102	C03_0065.tif	135.208	0.362	100	4.735	0.211	0.64		6.56034
104	C03_0065.tif	253.515	0.83	100	1.99	0.503	0.882		8.98311
105	C03_0065.tif	135.208	0.719	100	1.522	0.657	0.8		6.56034
106	C03_0065.tif	439.427	0.724	100	1.926	0.519	0.812		11.8268
108	C03_0065.tif	794.348	0.897	100	1.107	0.904	0.887		15.9012
109	C03_0065.tif	498.58	0.686	100	2.111	0.474	0.808		12.5977
111	C03_0065.tif	295.768	0.834	100	1.608	0.622	0.854		9.70288
117	C03_0065.tif	684.492	0.268	100	1.234	0.81	0.717		14.7608
118	C03_0065.tif	785.898	0.424	100	2.961	0.338	0.765		15.8164
119	C03_0065.tif	211.263	0.407	100	3.99	0.251	0.617		8.20043
122	C03_0065.tif	194.362	0.824	100	1.278	0.783	0.836		7.86558
123	C03_0065.tif	253.515	0.769	100	1.451	0.689	0.789		8.98311
124	C03_0065.tif	152.109	0.606	100	2.553	0.392	0.783		6.95829
127	C03_0065.tif	853.502	0.672	100	1.819	0.55	0.874		16.4827
132	C03_0065.tif	253.515	0.505	100	3.267	0.306	0.833		8.98311
135	C03_0065.tif	515.481	0.898	100	1.182	0.846	0.853		12.8095
137	C03_0065.tif	202.812	0.883	100	1.946	0.514	0.923		8.03474
139	C03_0065.tif	160.56	0.745	100	2.366	0.423	0.884		7.14897
140	C03_0065.tif	659.14	0.555	100	1.943	0.515	0.825		14.4848
151	C03_0065.tif	768.997	0.794	100	1.335	0.749	0.809		15.6454
152	C03_0065.tif	540.833	0.599	100	1.788	0.559	0.837		13.1207
153	C03_0065.tif	481.679	0.735	100	2.148	0.466	0.844		12.3824
155	C03_0065.tif	481.679	0.649	100	2.319	0.431	0.82		12.3824
160	C03_0065.tif	219.713	0.155	100	1.201	0.832	0.505		8.36282
163	C03_0065.tif	109.857	1	100	1.45	0.69	0.897		5.91342
169	C03_0065.tif	921.106	0.717	100	1.102	0.907	0.838		17.123
170	C03_0065.tif	802.799	0.566	100	1.777	0.563	0.792		15.9856
175	C03_0065.tif	1064.77	0.886	100	1.148	0.871	0.894		18.4099
177	C03_0065.tif	828.15	0.628	100	1.286	0.778	0.856		16.236
179	C03_0065.tif	228.164	0.836	100	1.279	0.782	0.818		8.52214
182	C03_0065.tif	439.427	0.779	100	1.792	0.558	0.86		11.8268
183	C03_0065.tif	135.208	0.857	100	1.39	0.719	0.8		6.56034
185	C03_0065.tif	135.208	0.588	100	2.816	0.355	0.821		6.56034
187	C03_0065.tif	481.679	0.627	100	2.118	0.472	0.797		12.3824
189	C03_0065.tif	236.614	0.8	100	1.764	0.567	0.8		8.67851
190	C03_0065.tif	109.857	0.584	100	3.517	0.284	0.722		5.91342
191	C03_0065.tif	304.218	0.746	100	1.976	0.506	0.774		9.84051
203	C03_0065.tif	397.174	0.887	100	1.12	0.893	0.839		11.2439
204	C03_0065.tif	397.174	0.63	100	2.501	0.4	0.777		11.2439
205	C03_0065.tif	828.15	0.918	100	1.192	0.839	0.903		16.236
211	C03_0065.tif	126.758	0.588	100	2.631	0.38	0.833		6.35203
212	C03_0065.tif	515.481	0.758	100	1.496	0.668	0.859		12.8095
217	C03_0065.tif	397.174	0.563	100	2.522	0.396	0.79		11.2439
223	C03_0065.tif	929.557	0.526	100	2.15	0.465	0.748		17.2014
225	C03_0065.tif	236.614	0.575	100	2.051	0.487	0.757		8.67851
231	C03_0065.tif	135.208	0.795	100	2.056	0.486	0.842		6.56034
233	C03_0065.tif	1580.25	0.587	100	1.516	0.659	0.794		22.4278
235	C03_0065.tif	819.7	0.612	100	2.146	0.466	0.886		16.153
237	C03_0065.tif	718.294	0.678	100	1.997	0.501	0.833		15.1208
240	C03_0065.tif	481.679	0.708	100	1.479	0.676	0.803		12.3824
243	C03_0065.tif	828.15	0.729	100	2.132	0.469	0.863		16.236
244	C03_0065.tif	422.526	0.681	100	2.132	0.469	0.84		11.5972
246	C03_0065.tif	1326.73	0.78	100	1.661	0.602	0.885		20.5502
252	C03_0065.tif	160.56	0.853	100	1.538	0.65	0.792		7.14897
254	C03_0065.tif	152.109	0.425	100	5.183	0.193	0.9		6.95829
255	C03_0065.tif	236.614	0.634	100	2.703	0.37	0.824		8.67851
257	C03_0065.tif	245.065	0.613	100	2.806	0.356	0.784		8.83214
259	C03_0065.tif	549.283	0.779	100	1.178	0.849	0.844		13.2228
260	C03_0065.tif	194.362	0.878	100	1.645	0.608	0.821		7.86558
262	C03_0065.tif	405.625	0.781	100	1.425	0.702	0.835		11.3629
263	C03_0065.tif	422.526	0.749	100	1.975	0.506	0.862		11.5972
266	C03_0065.tif	794.348	0.6	100	2.497	0.4	0.797		15.9012
268	C03_0065.tif	236.614	0.564	100	1.308	0.765	0.747		8.67851
269	C03_0065.tif	1014.06	0.559	100	2.791	0.358	0.836		17.9662
272	C03_0065.tif	963.359	0.482	100	2.135	0.468	0.778		17.5113
273	C03_0065.tif	1715.45	0.509	100	2.33	0.429	0.77		23.3676
276	C03_0065.tif	101.406	0.719	100	1.991	0.502	0.8		5.68142
279	C03_0065.tif	338.021	0.437	100	4.905	0.204	0.909		10.3728
281	C03_0065.tif	228.164	0.747	100	2.011	0.497	0.885		8.52214
289	C03_0065.tif	101.406	0.781	100	2.011	0.497	0.828		5.68142
297	C03_0065.tif	414.075	0.55	100	2.692	0.371	0.772		11.4806
301	C03_0065.tif	160.56	0.681	100	2.208	0.453	0.776		7.14897
308	C03_0065.tif	236.614	0.718	100	1.739	0.575	0.836		8.67851
309	C03_0065.tif	169.01	0.674	100	2.402	0.416	0.769		7.33468
311	C03_0065.tif	219.713	0.487	100	3.067	0.326	0.8		8.36282
317	C03_0065.tif	143.659	0.941	100	1.172	0.853	0.919		6.76225
318	C03_0065.tif	371.823	0.715	100	1.884	0.531	0.83		10.8791
322	C03_0065.tif	101.406	0.967	100	1.939	0.516	0.889		5.68142
325	C03_0065.tif	160.56	0.624	100	1.53	0.654	0.745		7.14897
327	C03_0065.tif	946.458	0.681	100	1.995	0.501	0.868		17.357
330	C03_0065.tif	980.26	0.691	100	1.463	0.684	0.847		17.6643
333	C03_0065.tif	321.12	0.673	100	2.791	0.358	0.809		10.1102
334	C03_0065.tif	270.416	0.22	100	7.907	0.126	0.577		9.27772
335	C03_0065.tif	397.174	0.704	100	2.21	0.453	0.81		11.2439
336	C03_0065.tif	338.021	0.472	100	3.766	0.266	0.777		10.3728
337	C03_0065.tif	109.857	0.178	100	2.426	0.412	0.433		5.91342
342	C03_0065.tif	1816.86	0.846	100	1.557	0.642	0.923		24.0484
343	C03_0065.tif	312.669	0.46	100	1.49	0.671	0.705		9.97625
345	C03_0065.tif	152.109	0.526	100	2.296	0.436	0.706		6.95829
352	C03_0065.tif	430.976	0.71	100	1.557	0.642	0.816		11.7126
353	C03_0065.tif	819.7	0.505	100	2.921	0.342	0.776		16.153
354	C03_0065.tif	118.307	0.423	100	4.389	0.228	0.636		6.13663
367	C03_0065.tif	101.406	0.719	100	1.433	0.698	0.8		5.68142
368	C03_0065.tif	219.713	0.666	100	1.67	0.599	0.754		8.36282
369	C03_0065.tif	228.164	0.303	100	2.97	0.337	0.6		8.52214
371	C03_0065.tif	1123.92	0.862	100	1.243	0.804	0.899		18.9144
372	C03_0065.tif	228.164	0.692	100	1.923	0.52	0.783		8.52214
377	C03_0065.tif	185.911	0.723	100	1.585	0.631	0.772		7.69268
380	C03_0065.tif	126.758	0.976	100	1.474	0.678	0.882		6.35203
383	C03_0065.tif	1242.23	0.392	100	3.124	0.32	0.774		19.885
386	C03_0065.tif	245.065	0.256	100	2.515	0.398	0.604		8.83214
387	C03_0065.tif	1191.52	0.771	100	1.266	0.79	0.865		19.4749
388	C03_0065.tif	177.461	0.5	100	2.292	0.436	0.724		7.51582
389	C03_0065.tif	270.416	0.746	100	1.309	0.764	0.78		9.27772
394	C03_0065.tif	439.427	0.556	100	2.508	0.399	0.788		11.8268
396	C03_0065.tif	211.263	0.692	100	2.57	0.389	0.833		8.20043
397	C03_0065.tif	143.659	0.667	100	2.754	0.363	0.829		6.76225
399	C03_0065.tif	371.823	0.686	100	2.495	0.401	0.88		10.8791
402	C03_0065.tif	304.218	0.662	100	1.693	0.591	0.774		9.84051
404	C03_0065.tif	169.01	0.838	100	2.006	0.499	0.851		7.33468
405	C03_0065.tif	312.669	0.821	100	1.541	0.649	0.796		9.97625
407	C03_0065.tif	338.021	0.691	100	2.156	0.464	0.825		10.3728
409	C03_0065.tif	126.758	0.746	100	2.106	0.475	0.857		6.35203
413	C03_0065.tif	278.867	0.404	100	1.556	0.643	0.702		9.42158
414	C03_0065.tif	118.307	0.993	100	1.318	0.759	0.848		6.13663
415	C03_0065.tif	135.208	0.772	100	1.495	0.669	0.744		6.56034
417	C03_0065.tif	202.812	0.374	100	2.183	0.458	0.615		8.03474
418	C03_0065.tif	422.526	0.517	100	1.994	0.502	0.758		11.5972
422	C03_0065.tif	777.447	0.789	100	1.455	0.687	0.86		15.7311
427	C03_0065.tif	135.208	0.508	100	4.217	0.237	0.78		6.56034
431	C03_0065.tif	1537.99	0.335	100	4.664	0.214	0.735		22.126
435	C03_0065.tif	346.471	0.546	100	2.546	0.393	0.788		10.5017
438	C03_0065.tif	997.161	0.756	100	1.256	0.796	0.861		17.8159
439	C03_0065.tif	109.857	0.344	100	1.199	0.834	0.52		5.91342
441	C03_0065.tif	194.362	0.964	100	1.317	0.759	0.868		7.86558
442	C03_0065.tif	185.911	0.595	100	3.105	0.322	0.746		7.69268
444	C03_0065.tif	338.021	0.49	100	1.767	0.566	0.678		10.3728
452	C03_0065.tif	219.713	0.825	100	1.231	0.812	0.852		8.36282
454	C03_0065.tif	845.051	0.624	100	2.598	0.385	0.806		16.4009
455	C03_0065.tif	346.471	0.537	100	3.033	0.33	0.766		10.5017
458	C03_0065.tif	118.307	0.775	100	2.463	0.406	0.875		6.13663
460	C03_0065.tif	1335.18	0.542	100	2.135	0.468	0.804		20.6156
463	C03_0065.tif	1250.68	0.771	100	1.242	0.805	0.881		19.9525
468	C03_0065.tif	101.406	1	100	1.281	0.78	0.857		5.68142
473	C03_0065.tif	143.659	0.845	100	1.396	0.717	0.85		6.76225
474	C03_0065.tif	557.734	0.791	100	1.206	0.829	0.857		13.3241
475	C03_0065.tif	169.01	0.764	100	1.731	0.578	0.8		7.33468
476	C03_0065.tif	202.812	0.407	100	3.325	0.301	0.649		8.03474
477	C03_0065.tif	160.56	0.725	100	2.344	0.427	0.776		7.14897
479	C03_0065.tif	211.263	0.424	100	1.812	0.552	0.61		8.20043
482	C03_0065.tif	380.273	0.732	100	1.394	0.717	0.833		11.002
496	C03_0065.tif	870.403	0.753	100	1.298	0.77	0.866		16.6451
498	C03_0065.tif	109.857	0.245	100	2.424	0.413	0.456		5.91342
501	C03_0065.tif	532.382	0.314	100	4.348	0.23	0.643		13.0178
506	C03_0065.tif	245.065	0.802	100	1.354	0.738	0.866		8.83214
513	C03_0065.tif	143.659	0.426	100	1.421	0.704	0.596		6.76225
517	C03_0065.tif	101.406	0.419	100	2.063	0.485	0.6		5.68142
520	C03_0065.tif	109.857	0.53	100	1.746	0.573	0.684		5.91342
522	C03_0065.tif	118.307	0.317	100	3.206	0.312	0.519		6.13663
529	C03_0065.tif	321.12	0.159	100	2.965	0.337	0.374		10.1102
531	C03_0065.tif	946.458	0.762	100	1.249	0.8	0.922		17.357
533	C03_0065.tif	185.911	0.322	100	6.24	0.16	0.688		7.69268
536	C03_0065.tif	1199.97	0.833	100	1.156	0.865	0.902		19.5439
537	C03_0065.tif	194.362	1	100	1.322	0.756	0.885		7.86558
539	C03_0065.tif	1352.08	0.551	100	2.166	0.462	0.816		20.7456
543	C03_0065.tif	371.823	0.747	100	1.27	0.787	0.786		10.8791
544	C03_0065.tif	388.724	0.563	100	2.65	0.377	0.754		11.1236
545	C03_0065.tif	109.857	0.211	100	3.019	0.331	0.448		5.91342
547	C03_0065.tif	118.307	0.696	100	2.85	0.351	0.8		6.13663
551	C03_0065.tif	938.007	0.386	100	3.836	0.261	0.74		17.2794
555	C03_0065.tif	329.57	0.444	100	2.608	0.383	0.709		10.2423
556	C03_0065.tif	346.471	0.651	100	2.253	0.444	0.796		10.5017
559	C03_0065.tif	532.382	0.408	100	2.502	0.4	0.75		13.0178
560	C03_0065.tif	295.768	0.451	100	2.497	0.4	0.722		9.70288
562	C03_0065.tif	261.966	0.581	100	2.651	0.377	0.873		9.13161
564	C03_0065.tif	143.659	0.497	100	2.095	0.477	0.667		6.76225
566	C03_0065.tif	202.812	0.686	100	1.657	0.603	0.727		8.03474
572	C03_0065.tif	1445.04	0.297	100	6.841	0.146	0.75		21.4469
573	C03_0065.tif	228.164	0.336	100	2.149	0.465	0.659		8.52214
575	C03_0065.tif	752.096	0.727	100	1.675	0.597	0.856		15.4725
577	C03_0065.tif	304.218	0.876	100	1.524	0.656	0.878		9.84051
580	C03_0065.tif	312.669	0.415	100	4.167	0.24	0.725		9.97625
587	C03_0065.tif	321.12	0.347	100	5.817	0.172	0.679		10.1102
591	C03_0065.tif	202.812	0.615	100	2.042	0.49	0.8		8.03474
599	C03_0065.tif	591.536	0.611	100	2.807	0.356	0.819		13.7219
602	C03_0065.tif	160.56	0.64	100	2.428	0.412	0.792		7.14897
607	C03_0065.tif	912.655	0.703	100	1.229	0.814	0.818		17.0443
610	C03_0065.tif	135.208	0.927	100	1.084	0.922	0.8		6.56034
618	C03_0065.tif	895.754	0.33	100	3.249	0.308	0.716		16.8857
620	C03_0065.tif	194.362	1	100	1.227	0.815	0.902		7.86558
627	C03_0065.tif	169.01	0.572	100	2.92	0.343	0.755		7.33468
632	C03_0065.tif	456.328	0.401	100	3.823	0.262	0.771		12.0521
637	C03_0065.tif	287.317	0.625	100	2.508	0.399	0.829		9.56325
650	C03_0065.tif	861.952	0.777	100	1.413	0.708	0.868		16.5641
651	C03_0065.tif	118.307	0.317	100	3.05	0.328	0.583		6.13663
653	C03_0065.tif	574.635	0.426	100	4.131	0.242	0.705		13.5245
662	C03_0065.tif	143.659	0.609	100	1.795	0.557	0.708		6.76225
668	C03_0065.tif	219.713	0.252	100	1.35	0.741	0.531		8.36282
671	C03_0065.tif	211.263	0.306	100	5.808	0.172	0.568		8.20043
676	C03_0065.tif	261.966	0.177	100	1.4	0.714	0.521		9.13161
682	C03_0065.tif	169.01	0.29	100	6.181	0.162	0.556		7.33468
684	C03_0065.tif	135.208	0.484	100	1.741	0.574	0.604		6.56034
688	C03_0065.tif	954.908	0.875	100	1.405	0.712	0.9		17.4344
689	C03_0065.tif	405.625	0.629	100	1.88	0.532	0.842		11.3629
691	C03_0065.tif	346.471	0.708	100	1.343	0.744	0.82		10.5017
695	C03_0065.tif	971.809	0.795	100	1.284	0.779	0.888		17.588
696	C03_0065.tif	456.328	0.828	100	1.278	0.782	0.837		12.0521
699	C03_0065.tif	202.812	0.433	100	4.127	0.242	0.706		8.03474
703	C03_0065.tif	1115.47	0.407	100	2.676	0.374	0.746		18.8432
709	C03_0065.tif	118.307	0.911	100	1.789	0.559	0.848		6.13663
716	C03_0065.tif	4385.82	0.737	100	1.651	0.606	0.92		37.3637
718	C03_0065.tif	439.427	0.494	100	3.224	0.31	0.8		11.8268
719	C03_0065.tif	625.338	0.605	100	2.321	0.431	0.809		14.1086
721	C03_0065.tif	202.812	0.686	100	1.849	0.541	0.8		8.03474
722	C03_0065.tif	118.307	0.4	100	4.024	0.249	0.571		6.13663
723	C03_0065.tif	735.195	0.524	100	2.409	0.415	0.76		15.2977
724	C03_0065.tif	616.888	0.862	100	1.662	0.602	0.88		14.0129
726	C03_0065.tif	202.812	0.743	100	1.418	0.705	0.814		8.03474
727	C03_0065.tif	261.966	0.655	100	2.137	0.468	0.827		9.13161
728	C03_0065.tif	1149.27	0.565	100	2.541	0.394	0.822		19.1265
732	C03_0065.tif	236.614	0.667	100	2.596	0.385	0.789		8.67851
734	C03_0065.tif	194.362	0.775	100	1.498	0.667	0.821		7.86558
736	C03_0065.tif	236.614	0.161	100	1.883	0.531	0.427		8.67851
744	C03_0065.tif	1774.61	0.598	100	1.699	0.589	0.8		23.7671
747	C03_0065.tif	109.857	0.922	100	1.185	0.844	0.812		5.91342
752	C03_0065.tif	388.724	0.584	100	1.328	0.753	0.713		11.1236
753	C03_0065.tif	2028.12	0.817	100	1.406	0.711	0.911		25.4081
757	C03_0065.tif	143.659	0.527	100	2.872	0.348	0.723		6.76225
759	C03_0065.tif	253.515	0.73	100	1.998	0.501	0.882		8.98311
762	C03_0065.tif	219.713	0.932	100	1.388	0.72	0.867		8.36282
763	C03_0065.tif	253.515	0.877	100	1.784	0.56	0.882		8.98311
764	C03_0065.tif	109.857	0.438	100	4.039	0.248	0.703		5.91342
772	C03_0065.tif	126.758	0.654	100	3.466	0.289	0.769		6.35203
775	C03_0065.tif	245.065	0.548	100	3.448	0.29	0.699		8.83214
776	C03_0065.tif	109.857	0.753	100	2.31	0.433	0.743		5.91342
778	C03_0065.tif	118.307	0.4	100	4.447	0.225	0.583		6.13663
780	C03_0065.tif	692.942	0.262	100	3.02	0.331	0.562		14.8516
783	C03_0065.tif	261.966	0.642	100	2.478	0.403	0.721		9.13161
784	C03_0065.tif	1453.49	0.592	100	1.903	0.525	0.821		21.5095
786	C03_0065.tif	1132.37	0.164	100	4.604	0.217	0.473		18.9854
790	C03_0065.tif	126.758	0.898	100	1.247	0.802	0.857		6.35203
794	C03_0065.tif	861.952	0.697	100	1.049	0.953	0.813		16.5641
796	C03_0065.tif	574.635	0.748	100	1.536	0.651	0.855		13.5245
797	C03_0065.tif	109.857	0.675	100	3.257	0.307	0.743		5.91342
799	C03_0065.tif	126.758	0.804	100	1.704	0.587	0.811		6.35203
801	C03_0065.tif	177.461	0.88	100	1.695	0.59	0.875		7.51582
802	C03_0065.tif	1140.82	0.231	100	1.791	0.558	0.621		19.0561
804	C03_0065.tif	1216.87	0.656	100	1.348	0.742	0.862		19.681
805	C03_0065.tif	2154.88	0.46	100	1.43	0.699	0.793		26.1901
812	C03_0065.tif	354.922	0.695	100	1.678	0.596	0.84		10.629
813	C03_0065.tif	1183.07	0.524	100	2.95	0.339	0.828		19.4058
817	C03_0065.tif	388.724	0.423	100	4.312	0.232	0.793		11.1236
823	C03_0065.tif	397.174	0.848	100	1.94	0.515	0.879		11.2439
825	C03_0065.tif	118.307	0.535	100	1.834	0.545	0.7		6.13663
826	C03_0065.tif	371.823	0.547	100	2.76	0.362	0.786		10.8791
829	C03_0065.tif	633.789	0.69	100	2.039	0.49	0.829		14.2036
831	C03_0065.tif	101.406	1	100	1.333	0.75	1		5.68142
838	C03_0065.tif	684.492	0.381	100	3.671	0.272	0.73		14.7608
839	C03_0065.tif	523.932	0.538	100	2.387	0.419	0.785		12.9141
843	C03_0065.tif	236.614	0.718	100	1.367	0.731	0.836		8.67851
845	C03_0065.tif	270.416	0.453	100	1.303	0.768	0.653		9.27772
847	C03_0065.tif	405.625	0.606	100	2.985	0.335	0.828		11.3629
848	C03_0065.tif	278.867	0.346	100	3.89	0.257	0.564		9.42158
850	C03_0065.tif	709.843	0.632	100	2.641	0.379	0.824		15.0316
859	C03_0065.tif	118.307	0.391	100	1.889	0.529	0.583		6.13663
861	C03_0065.tif	287.317	0.521	100	1.13	0.885	0.694		9.56325
862	C03_0065.tif	109.857	0.427	100	3.439	0.291	0.684		5.91342
864	C03_0065.tif	278.867	0.596	100	2.101	0.476	0.776		9.42158
871	C03_0065.tif	101.406	0.967	100	1.469	0.681	0.889		5.68142
876	C03_0065.tif	1487.29	0.672	100	1.455	0.687	0.828		21.7582
877	C03_0065.tif	397.174	0.507	100	3.202	0.312	0.832		11.2439
883	C03_0065.tif	143.659	0.559	100	2.993	0.334	0.739		6.76225
884	C03_0065.tif	143.659	0.845	100	1.658	0.603	0.85		6.76225
885	C03_0065.tif	143.659	1	100	1.385	0.722	0.919		6.76225
889	C03_0065.tif	118.307	0.838	100	2.223	0.45	0.875		6.13663
890	C03_0065.tif	414.075	0.531	100	1.936	0.517	0.7		11.4806
896	C03_0065.tif	169.01	0.898	100	1.219	0.82	0.87		7.33468
903	C03_0065.tif	135.208	0.927	100	1.781	0.562	0.8		6.56034
912	C03_0065.tif	515.481	0.245	100	3.266	0.306	0.555		12.8095
916	C03_0065.tif	768.997	0.848	100	1.515	0.66	0.948		15.6454
920	C03_0065.tif	523.932	0.555	100	2.064	0.485	0.838		12.9141
924	C03_0065.tif	498.58	0.749	100	1.444	0.693	0.837		12.5977
929	C03_0065.tif	2332.34	0.552	100	2.022	0.495	0.814		27.2472
938	C03_0065.tif	490.13	0.772	100	1.461	0.685	0.866		12.4905
941	C03_0065.tif	405.625	0.361	100	2.829	0.353	0.64		11.3629
942	C03_0065.tif	439.427	0.779	100	1.694	0.59	0.832		11.8268
945	C03_0065.tif	321.12	0.731	100	1.922	0.52	0.884		10.1102
946	C03_0065.tif	118.307	0.647	100	2.251	0.444	0.824		6.13663
953	C03_0065.tif	321.12	0.449	100	3.384	0.296	0.691		10.1102
954	C03_0065.tif	101.406	0.489	100	3.481	0.287	0.667		5.68142
962	C03_0065.tif	245.065	0.898	100	1.421	0.704	0.853		8.83214
965	C03_0065.tif	160.56	0.476	100	2.287	0.437	0.633		7.14897
966	C03_0065.tif	245.065	0.953	100	1.853	0.54	0.866		8.83214
967	C03_0065.tif	532.382	0.375	100	2.44	0.41	0.754		13.0178
968	C03_0065.tif	811.249	0.785	100	1.76	0.568	0.873		16.0695
970	C03_0065.tif	523.932	0.48	100	1.928	0.519	0.681		12.9141
971	C03_0065.tif	583.085	0.51	100	2.828	0.354	0.75		13.6236
973	C03_0065.tif	219.713	0.76	100	1.781	0.562	0.825		8.36282
975	C03_0065.tif	633.789	0.362	100	4.538	0.22	0.721		14.2036
983	C03_0065.tif	456.328	0.431	100	2.849	0.351	0.671		12.0521
985	C03_0065.tif	236.614	0.505	100	2.617	0.382	0.747		8.67851
987	C03_0065.tif	160.56	0.422	100	5.467	0.183	0.655		7.14897
989	C03_0065.tif	447.877	0.604	100	1.471	0.68	0.763		11.94
992	C03_0065.tif	118.307	0.587	100	1.875	0.533	0.737		6.13663
993	C03_0065.tif	261.966	0.57	100	2.772	0.361	0.838		9.13161
999	C03_0065.tif	1377.43	0.282	100	5.931	0.169	0.716		20.9392
1006	C03_0065.tif	135.208	1	100	1.392	0.718	0.889		6.56034
1007	C03_0065.tif	185.911	0.405	100	3.229	0.31	0.688		7.69268
1010	C03_0065.tif	380.273	0.43	100	1.446	0.692	0.726		11.002
1011	C03_0065.tif	152.109	0.591	100	2.319	0.431	0.75		6.95829
1012	C03_0065.tif	245.065	0.691	100	2.501	0.4	0.784		8.83214
1013	C03_0065.tif	321.12	0.529	100	3.665	0.273	0.784		10.1102
1014	C03_0065.tif	109.857	0.956	100	1.551	0.645	0.929		5.91342
1016	C03_0065.tif	152.109	0.734	100	2.271	0.44	0.75		6.95829
1019	C03_0065.tif	261.966	0.838	100	1.712	0.584	0.849		9.13161
1021	C03_0065.tif	278.867	0.635	100	2.206	0.453	0.795		9.42158
1036	C03_0065.tif	118.307	0.993	100	1.264	0.791	0.848		6.13663
1039	C03_0065.tif	422.526	0.143	100	4.928	0.203	0.459		11.5972
1040	C03_0065.tif	726.744	0.622	100	1.588	0.63	0.775		15.2095
1041	C03_0065.tif	371.823	0.976	100	1.205	0.83	0.88		10.8791
1042	C03_0065.tif	177.461	0.476	100	1.403	0.713	0.627		7.51582
1055	C03_0065.tif	261.966	0.56	100	1.511	0.662	0.747		9.13161
1056	C03_0065.tif	676.041	0.893	100	1.205	0.83	0.914		14.6694
1058	C03_0065.tif	735.195	0.14	100	1.775	0.564	0.483		15.2977
1059	C03_0065.tif	338.021	0.77	100	1.777	0.563	0.816		10.3728
1067	C03_0065.tif	1335.18	0.517	100	2.802	0.357	0.829		20.6156
1074	C03_0065.tif	346.471	0.843	100	1.424	0.702	0.863		10.5017
1076	C03_0065.tif	430.976	0.722	100	2.224	0.45	0.857		11.7126
1079	C03_0065.tif	1233.78	0.653	100	2.483	0.403	0.851		19.8172
1082	C03_0065.tif	253.515	0.171	100	2.694	0.371	0.5		8.98311
1085	C03_0065.tif	219.713	1	100	1.271	0.787	0.867		8.36282
1095	C03_0065.tif	2949.23	0.767	100	1.351	0.74	0.87		30.6393
1096	C03_0065.tif	1047.86	0.513	100	2.573	0.389	0.78		18.2632
1100	C03_0065.tif	777.447	0.516	100	3.194	0.313	0.79		15.7311
1105	C03_0065.tif	185.911	0.897	100	1.167	0.857	0.8		7.69268
1110	C03_0065.tif	667.591	0.677	100	1.104	0.906	0.845		14.5774
1111	C03_0065.tif	152.109	0.965	100	1.103	0.906	0.857		6.95829
1116	C03_0065.tif	101.406	0.967	100	1.469	0.681	0.889		5.68142
1132	C03_0065.tif	109.857	0.53	100	3.129	0.32	0.667		5.91342
1139	C03_0065.tif	515.481	0.564	100	2.656	0.376	0.772		12.8095
1140	C03_0065.tif	109.857	0.51	100	4.763	0.21	0.703		5.91342
1145	C03_0065.tif	295.768	0.579	100	2.151	0.465	0.753		9.70288
1148	C03_0065.tif	169.01	0.283	100	2.135	0.468	0.526		7.33468
1149	C03_0065.tif	118.307	0.604	100	3.699	0.27	0.933		6.13663
1158	C03_0065.tif	169.01	0.717	100	1.441	0.694	0.8		7.33468
1161	C03_0065.tif	354.922	0.478	100	3.588	0.279	0.8		10.629
1163	C03_0065.tif	160.56	0.775	100	1.343	0.745	0.776		7.14897
1165	C03_0065.tif	566.184	0.648	100	2.346	0.426	0.807		13.4247
1166	C03_0065.tif	650.69	0.556	100	1.504	0.665	0.798		14.3917
1171	C03_0065.tif	126.758	0.723	100	1.125	0.889	0.732		6.35203
1172	C03_0065.tif	135.208	0.272	100	2.917	0.343	0.471		6.56034
1178	C03_0065.tif	152.109	0.209	100	1.42	0.704	0.486		6.95829
1181	C03_0065.tif	143.659	0.911	100	1.86	0.538	0.85		6.76225
1184	C03_0065.tif	152.109	0.808	100	1.184	0.845	0.766		6.95829
1185	C03_0065.tif	219.713	0.719	100	1.95	0.513	0.881		8.36282
1190	C03_0065.tif	109.857	0.352	100	1.394	0.717	0.578		5.91342
1193	C03_0065.tif	1554.89	0.3	100	2.184	0.458	0.589		22.2472
1207	C03_0065.tif	1216.87	0.795	100	1.134	0.882	0.889		19.681
1216	C03_0065.tif	202.812	0.3	100	2.443	0.409	0.608		8.03474
1226	C03_0065.tif	752.096	0.763	100	1.228	0.814	0.86		15.4725
1228	C03_0065.tif	143.659	0.37	100	5.31	0.188	0.654		6.76225
1229	C03_0065.tif	380.273	0.89	100	1.325	0.755	0.849		11.002
1230	C03_0065.tif	101.406	0.967	100	1.679	0.596	0.923		5.68142
1237	C03_0065.tif	2873.18	0.596	100	2.162	0.462	0.871		30.2417
1238	C03_0065.tif	219.713	0.76	100	1.761	0.568	0.788		8.36282
1241	C03_0065.tif	101.406	0.851	100	1.66	0.602	0.774		5.68142
1245	C03_0065.tif	152.109	0.687	100	1.894	0.528	0.72		6.95829
1248	C03_0065.tif	1791.51	0.546	100	1.688	0.593	0.774		23.88
1251	C03_0065.tif	473.229	0.867	100	1.445	0.692	0.949		12.2733
1255	C03_0065.tif	371.823	0.512	100	3.995	0.25	0.752		10.8791
1256	C03_0065.tif	1419.69	0.585	100	1.885	0.53	0.804		21.2579
1257	C03_0065.tif	202.812	0.397	100	4.035	0.248	0.623		8.03474
1260	C03_0065.tif	270.416	0.82	100	1.171	0.854	0.877		9.27772
1262	C03_0065.tif	456.328	0.842	100	1.588	0.63	0.864		12.0521
1263	C03_0065.tif	397.174	0.704	100	2.323	0.43	0.839		11.2439
1264	C03_0065.tif	126.758	0.674	100	3	0.333	0.769		6.35203
1267	C03_0065.tif	498.58	0.718	100	2.68	0.373	0.929		12.5977
1268	C03_0065.tif	126.758	0.694	100	2.924	0.342	0.833		6.35203
1269	C03_0065.tif	185.911	0.488	100	2.333	0.429	0.657		7.69268
1270	C03_0065.tif	735.195	0.54	100	3.52	0.284	0.806		15.2977
1271	C03_0065.tif	338.021	0.624	100	2.233	0.448	0.777		10.3728
1273	C03_0065.tif	135.208	0.652	100	2.898	0.345	0.744		6.56034
1276	C03_0065.tif	338.021	0.862	100	1.352	0.74	0.851		10.3728
1278	C03_0065.tif	270.416	0.633	100	1.642	0.609	0.771		9.27772
1279	C03_0065.tif	321.12	0.861	100	1.368	0.731	0.864		10.1102
1280	C03_0065.tif	160.56	0.944	100	1.609	0.622	0.864		7.14897
1281	C03_0065.tif	464.778	0.387	100	2.95	0.339	0.738		12.1632
1283	C03_0065.tif	1301.38	0.724	100	1.555	0.643	0.89		20.3529
1284	C03_0065.tif	346.471	0.43	100	2.271	0.44	0.672		10.5017
1285	C03_0065.tif	709.843	0.739	100	1.437	0.696	0.866		15.0316
1288	C03_0065.tif	498.58	0.869	100	1.698	0.589	0.874		12.5977
1295	C03_0065.tif	245.065	0.48	100	3.984	0.251	0.753		8.83214
1303	C03_0065.tif	135.208	0.573	100	2.692	0.371	0.744		6.56034
1304	C03_0065.tif	1242.23	0.465	100	1.408	0.71	0.764		19.885
1306	C03_0065.tif	160.56	1	100	1.491	0.671	0.884		7.14897
1319	C03_0065.tif	354.922	0.808	100	1.542	0.649	0.857		10.629
1320	C03_0065.tif	312.669	0.577	100	1.938	0.516	0.763		9.97625
1329	C03_0065.tif	143.659	0.573	100	2.764	0.362	0.708		6.76225
1330	C03_0065.tif	177.461	0.527	100	3.483	0.287	0.724		7.51582
1333	C03_0065.tif	988.71	0.742	100	1.215	0.823	0.848		17.7402
1337	C03_0065.tif	540.833	0.51	100	2.715	0.368	0.757		13.1207
1339	C03_0065.tif	118.307	0.911	100	1.95	0.513	0.848		6.13663
1346	C03_0065.tif	329.57	0.623	100	1.753	0.57	0.75		10.2423
1351	C03_0065.tif	118.307	0.253	100	1.247	0.802	0.538		6.13663
1352	C03_0065.tif	1166.17	0.578	100	2.698	0.371	0.826		19.2666
1355	C03_0065.tif	878.853	0.684	100	1.731	0.578	0.849		16.7257
1359	C03_0065.tif	109.857	0.646	100	2.98	0.336	0.812		5.91342
1363	C03_0065.tif	270.416	0.331	100	2.913	0.343	0.634		9.27772
1367	C03_0065.tif	1157.72	0.647	100	2.475	0.404	0.851		19.1967
1369	C03_0065.tif	109.857	0.846	100	1.969	0.508	0.839		5.91342
1373	C03_0065.tif	388.724	0.795	100	1.894	0.528	0.852		11.1236
1374	C03_0065.tif	152.109	0.662	100	2.439	0.41	0.878		6.95829
1375	C03_0065.tif	135.208	0.628	100	3.217	0.311	0.8		6.56034
1378	C03_0065.tif	363.372	0.424	100	1.714	0.583	0.688		10.7548
1380	C03_0065.tif	245.065	0.427	100	1.657	0.603	0.674		8.83214
1383	C03_0065.tif	219.713	0.76	100	2.264	0.442	0.825		8.36282
1385	C03_0065.tif	135.208	0.254	100	7.646	0.131	0.593		6.56034
1386	C03_0065.tif	794.348	0.538	100	2.908	0.344	0.839		15.9012
1389	C03_0065.tif	118.307	0.727	100	1.578	0.634	0.757		6.13663
1390	C03_0065.tif	1478.84	0.47	100	1.864	0.536	0.697		21.6963
1392	C03_0065.tif	211.263	0.621	100	3.188	0.314	0.909		8.20043
1393	C03_0065.tif	152.109	0.734	100	1.127	0.888	0.75		6.95829
1397	C03_0065.tif	101.406	0.539	100	3.425	0.292	0.706		5.68142
1403	C03_0065.tif	228.164	0.204	100	9.766	0.102	0.551		8.52214
1405	C03_0065.tif	354.922	0.772	100	1.493	0.67	0.848		10.629
1408	C03_0065.tif	608.437	0.625	100	1.187	0.842	0.75		13.9166
1419	C03_0065.tif	295.768	0.399	100	5.487	0.182	0.729		9.70288
1421	C03_0065.tif	126.758	0.976	100	1.759	0.569	0.882		6.35203
1425	C03_0065.tif	219.713	0.313	100	6.355	0.157	0.584		8.36282
1428	C03_0065.tif	135.208	0.611	100	1.578	0.634	0.667		6.56034
1430	C03_0065.tif	270.416	0.725	100	1.876	0.533	0.821		9.27772
1432	C03_0065.tif	1208.42	0.62	100	1.835	0.545	0.801		19.6126
1440	C03_0065.tif	101.406	0.967	100	1.419	0.705	0.889		5.68142
1442	C03_0065.tif	202.812	0.941	100	1.216	0.822	0.906		8.03474
1443	C03_0065.tif	625.338	0.736	100	1.685	0.594	0.855		14.1086
1444	C03_0065.tif	963.359	0.327	100	3.061	0.327	0.757		17.5113
1445	C03_0065.tif	405.625	0.781	100	1.79	0.559	0.865		11.3629
1446	C03_0065.tif	1757.71	0.792	100	1.441	0.694	0.897		23.6537
1449	C03_0065.tif	346.471	0.358	100	5.454	0.183	0.683		10.5017
1454	C03_0065.tif	228.164	0.544	100	2.652	0.377	0.711		8.52214
1456	C03_0065.tif	169.01	0.698	100	1.611	0.621	0.755		7.33468
1457	C03_0065.tif	135.208	0.795	100	1.635	0.612	0.821		6.56034
1458	C03_0065.tif	143.659	0.559	100	3.309	0.302	0.723		6.76225
1459	C03_0065.tif	245.065	0.146	100	2.524	0.396	0.475		8.83214
1460	C03_0065.tif	143.659	0.845	100	2.034	0.492	0.872		6.76225
1463	C03_0065.tif	430.976	0.815	100	1.398	0.715	0.843		11.7126
1464	C03_0065.tif	1140.82	0.583	100	1.498	0.668	0.857		19.0561
1468	C03_0065.tif	169.01	0.444	100	3.032	0.33	0.597		7.33468
1471	C03_0065.tif	1166.17	0.585	100	2.139	0.468	0.786		19.2666
1473	C03_0065.tif	177.461	0.943	100	1.158	0.864	0.84		7.51582
1474	C03_0065.tif	118.307	0.233	100	1.597	0.626	0.438		6.13663
1477	C03_0065.tif	481.679	0.427	100	4.588	0.218	0.832		12.3824
1481	C03_0065.tif	2932.33	0.304	100	5.224	0.191	0.759		30.5514
1483	C03_0065.tif	346.471	0.774	100	2.045	0.489	0.863		10.5017
1487	C03_0065.tif	422.526	0.736	100	1.774	0.564	0.847		11.5972
1488	C03_0065.tif	557.734	0.865	100	1.532	0.653	0.917		13.3241
1500	C03_0065.tif	726.744	0.575	100	1.682	0.594	0.735		15.2095
1501	C03_0065.tif	219.713	0.365	100	4.806	0.208	0.825		8.36282
1506	C03_0065.tif	109.857	0.697	100	2.882	0.347	0.743		5.91342
1510	C03_0065.tif	397.174	0.665	100	1.73	0.578	0.77		11.2439
1513	C03_0065.tif	1149.27	0.654	100	1.581	0.633	0.786		19.1265
1517	C03_0065.tif	777.447	0.251	100	8.277	0.121	0.684		15.7311
1519	C03_0065.tif	194.362	0.902	100	1.931	0.518	0.92		7.86558
1525	C03_0065.tif	211.263	0.595	100	1.353	0.739	0.746		8.20043
1528	C03_0065.tif	329.57	0.883	100	1.41	0.709	0.867		10.2423
1529	C03_0065.tif	295.768	0.62	100	2.866	0.349	0.795		9.70288
1530	C03_0065.tif	540.833	0.694	100	1.316	0.76	0.837		13.1207
1532	C03_0065.tif	126.758	0.629	100	2.393	0.418	0.769		6.35203
1534	C03_0065.tif	261.966	0.241	100	9.856	0.101	0.608		9.13161
1537	C03_0065.tif	135.208	0.211	100	8.636	0.116	0.516		6.56034
1538	C03_0065.tif	160.56	0.259	100	5.752	0.174	0.613		7.14897
1539	C03_0065.tif	439.427	0.811	100	1.911	0.523	0.846		11.8268
1542	C03_0065.tif	828.15	0.575	100	1.952	0.512	0.8		16.236
1545	C03_0065.tif	1149.27	0.369	100	2.014	0.496	0.723		19.1265
1551	C03_0065.tif	321.12	0.412	100	4.049	0.247	0.685		10.1102
1552	C03_0065.tif	1461.94	0.359	100	2.306	0.434	0.669		21.572
1553	C03_0065.tif	169.01	0.513	100	2.361	0.424	0.714		7.33468
1554	C03_0065.tif	1030.96	0.568	100	2.199	0.455	0.827		18.1153
1555	C03_0065.tif	219.713	0.524	100	3.279	0.305	0.743		8.36282
1556	C03_0065.tif	202.812	0.615	100	2.027	0.493	0.75		8.03474
1567	C03_0065.tif	177.461	0.65	100	2.708	0.369	0.778		7.51582
1573	C03_0065.tif	574.635	0.415	100	1.364	0.733	0.663		13.5245
1574	C03_0065.tif	1698.55	0.598	100	2.022	0.495	0.819		23.2522
1577	C03_0065.tif	963.359	0.771	100	1.425	0.702	0.848		17.5113
1582	C03_0065.tif	245.065	0.41	100	4.683	0.214	0.69		8.83214
1583	C03_0065.tif	295.768	0.407	100	1.747	0.572	0.614		9.70288
1584	C03_0065.tif	202.812	0.635	100	3.284	0.304	0.75		8.03474
1585	C03_0065.tif	295.768	0.834	100	1.739	0.575	0.864		9.70288
1587	C03_0065.tif	135.208	0.671	100	1.954	0.512	0.762		6.56034
1589	C03_0065.tif	253.515	0.877	100	1.496	0.669	0.857		8.98311
1593	C03_0065.tif	236.614	0.667	100	1.28	0.781	0.789		8.67851
1594	C03_0065.tif	498.58	0.79	100	1.378	0.726	0.861		12.5977
1595	C03_0065.tif	135.208	0.719	100	2.168	0.461	0.744		6.56034
1596	C03_0065.tif	735.195	0.711	100	1.764	0.567	0.861		15.2977
1598	C03_0065.tif	236.614	0.412	100	1.844	0.542	0.659		8.67851
1600	C03_0065.tif	895.754	0.6	100	2.633	0.38	0.831		16.8857
1602	C03_0065.tif	152.109	0.755	100	1.969	0.508	0.818		6.95829
1606	C03_0065.tif	261.966	0.513	100	1.718	0.582	0.795		9.13161
1608	C03_0065.tif	169.01	0.838	100	1.713	0.584	0.851		7.33468
1610	C03_0065.tif	261.966	0.702	100	2.013	0.497	0.849		9.13161
1613	C03_0065.tif	2104.18	0.578	100	2.345	0.427	0.877		25.8801
1614	C03_0065.tif	228.164	1	100	1.046	0.956	0.885		8.52214
1615	C03_0065.tif	853.502	0.431	100	2.22	0.45	0.789		16.4827
1616	C03_0065.tif	101.406	0.458	100	3.35	0.298	0.615		5.68142
1618	C03_0065.tif	464.778	0.617	100	2.001	0.5	0.791		12.1632
1619	C03_0065.tif	143.659	0.693	100	2.864	0.349	0.739		6.76225
1622	C03_0065.tif	287.317	0.625	100	3.033	0.33	0.84		9.56325
1623	C03_0065.tif	481.679	0.698	100	1.691	0.591	0.809		12.3824
1625	C03_0065.tif	1030.96	0.423	100	1.635	0.612	0.753		18.1153
1630	C03_0065.tif	363.372	0.493	100	2.232	0.448	0.735		10.7548
1632	C03_0065.tif	397.174	0.764	100	1.989	0.503	0.81		11.2439
1633	C03_0065.tif	101.406	0.781	100	1.61	0.621	0.774		5.68142
1635	C03_0065.tif	236.614	0.437	100	3.888	0.257	0.691		8.67851
1636	C03_0065.tif	371.823	0.93	100	1.086	0.921	0.871		10.8791
1638	C03_0065.tif	1030.96	0.466	100	2.496	0.401	0.792		18.1153
1641	C03_0065.tif	625.338	0.684	100	1.873	0.534	0.846		14.1086
1645	C03_0065.tif	430.976	0.246	100	1.814	0.551	0.534		11.7126
1648	C03_0065.tif	228.164	0.73	100	1.952	0.512	0.831		8.52214
1651	C03_0065.tif	354.922	0.618	100	2	0.5	0.808		10.629
1652	C03_0065.tif	270.416	0.471	100	2.991	0.334	0.681		9.27772
1654	C03_0065.tif	278.867	0.747	100	1.221	0.819	0.742		9.42158
1655	C03_0065.tif	101.406	0.967	100	2	0.5	0.889		5.68142
1658	C03_0065.tif	194.362	0.712	100	2.764	0.362	0.821		7.86558
1659	C03_0065.tif	245.065	0.657	100	2.596	0.385	0.795		8.83214
1660	C03_0065.tif	599.986	0.71	100	1.478	0.677	0.802		13.8196
1662	C03_0065.tif	109.857	0.779	100	1.817	0.55	0.839		5.91342
1665	C03_0065.tif	194.362	0.482	100	3.705	0.27	0.852		7.86558
1667	C03_0065.tif	633.789	0.364	100	1.77	0.565	0.721		14.2036
1668	C03_0065.tif	101.406	0.931	100	1.186	0.843	0.8		5.68142
1669	C03_0065.tif	464.778	0.823	100	2.09	0.478	0.88		12.1632
1670	C03_0065.tif	346.471	0.754	100	2.025	0.494	0.845		10.5017
1671	C03_0065.tif	194.362	0.56	100	1.845	0.542	0.767		7.86558
1673	C03_0065.tif	118.307	0.727	100	1.73	0.578	0.718		6.13663
1675	C03_0065.tif	388.724	0.616	100	1.859	0.538	0.719		11.1236
1677	C03_0065.tif	1039.41	0.578	100	2.592	0.386	0.842		18.1894
1679	C03_0065.tif	169.01	0.994	100	1.494	0.669	0.93		7.33468
1681	C03_0065.tif	633.789	0.371	100	5.407	0.185	0.754		14.2036
1688	C03_0065.tif	811.249	0.599	100	1.684	0.594	0.79		16.0695
1693	C03_0065.tif	380.273	0.257	100	3.801	0.263	0.662		11.002
1696	C03_0065.tif	430.976	0.382	100	5.257	0.19	0.773		11.7126
1703	C03_0065.tif	599.986	0.765	100	1.762	0.567	0.893		13.8196
1706	C03_0065.tif	135.208	0.401	100	3.231	0.31	0.593		6.56034
1711	C03_0065.tif	135.208	0.479	100	3.391	0.295	0.762		6.56034
1712	C03_0065.tif	447.877	0.877	100	1.352	0.74	0.883		11.94
1715	C03_0065.tif	270.416	0.676	100	2.12	0.472	0.821		9.27772
1718	C03_0065.tif	169.01	0.717	100	1.856	0.539	0.833		7.33468
1719	C03_0065.tif	169.01	0.764	100	1.461	0.685	0.769		7.33468
1721	C03_0065.tif	650.69	0.344	100	6.536	0.153	0.74		14.3917
1722	C03_0065.tif	253.515	0.986	100	1.511	0.662	0.882		8.98311
1723	C03_0065.tif	295.768	0.834	100	1.295	0.772	0.805		9.70288
1725	C03_0065.tif	752.096	0.662	100	1.17	0.855	0.805		15.4725
1728	C03_0065.tif	523.932	0.408	100	1.609	0.621	0.743		12.9141
1732	C03_0065.tif	143.659	0.46	100	2.038	0.491	0.708		6.76225
1734	C03_0065.tif	245.065	0.977	100	1.049	0.953	0.892		8.83214
1736	C03_0065.tif	1428.14	0.253	100	6.563	0.152	0.644		21.3211
1737	C03_0065.tif	143.659	0.82	100	1.848	0.541	0.791		6.76225
1739	C03_0065.tif	261.966	0.96	100	1.351	0.74	0.873		9.13161
1740	C03_0065.tif	236.614	0.429	100	2.164	0.462	0.583		8.67851
1743	C03_0065.tif	169.01	0.572	100	3.401	0.294	0.727		7.33468
1746	C03_0065.tif	118.307	0.549	100	3.155	0.317	0.7		6.13663
1747	C03_0065.tif	667.591	0.857	100	1.219	0.821	0.863		14.5774
1749	C03_0065.tif	304.218	0.65	100	1.257	0.795	0.774		9.84051
1751	C03_0065.tif	878.853	0.801	100	1.492	0.67	0.897		16.7257
1754	C03_0065.tif	126.758	0.976	100	1.486	0.673	0.857		6.35203
1755	C03_0065.tif	532.382	0.844	100	1.313	0.762	0.846		13.0178
1756	C03_0065.tif	253.515	0.479	100	2.464	0.406	0.645		8.98311
1757	C03_0065.tif	684.492	0.773	100	2.2	0.455	0.853		14.7608
1758	C03_0065.tif	270.416	0.762	100	1.851	0.54	0.81		9.27772
1760	C03_0065.tif	346.471	0.928	100	1.433	0.698	0.891		10.5017
1761	C03_0065.tif	169.01	0.784	100	1.296	0.772	0.851		7.33468
1763	C03_0065.tif	169.01	0.674	100	1.122	0.891	0.784		7.33468
1764	C03_0065.tif	591.536	0.883	100	1.712	0.584	0.927		13.7219
1765	C03_0065.tif	143.659	0.649	100	1.815	0.551	0.708		6.76225
1768	C03_0065.tif	659.14	0.372	100	6.68	0.15	0.902		14.4848
