# Supplementary material for: Survival of natural glass under hyperalkaline conditions for ~4000 years
Source: Research Square preprint supplement (doi:10.21203/rs.3.rs-1721591/v1), 2022-06-16
Supplement: Supplementary file 1 [file f9abd124ca15934324331ac0.pdf]

## Supplementary information

### “Survival of natural glass under hyperalkaline conditions for ~4000 years”

Ryosuke Kikuchi\*, Tsutomu Sato, Naoki Fujii, Misato Shimbashi, Carlo A. Arcilla

#### 1. Sample preparation

Several centimeter-sized blocks of sediment containing volcanic ash were embedded in epoxy resin and hardened at room temperature. Polishing was performed using a complete dry procedure without using any use of water or oil. In addition to thin-sections, dispersed specimens were also prepared. A small amount of sediment block was dispersed in ethanol, and then the suspension after ultrasonification was dropped on the membrane of a lacey-carbon coated 200 mesh copper grids. A carbon coating was applied to both thin sections and dispersed specimens to give them electron conductivity.

#### 2. Electron microscopy

Scanning electron microscopy with energy dispersive spectrometry (JSM IT-200, JEOL) was performed at an accelerating voltage of 15 kV. The chemical composition of the volcanic glass, based on SEM-EDS and the assumption of water free is shown in Table S1; 10 point-analyses were averaged.

Table S1. Chemical composition of the glass

|                                | wt%   | S.D.% |
|--------------------------------|-------|-------|
| Na <sub>2</sub> O              | 2.62  | 0.11  |
| MgO                            | 0.19  | 0.10  |
| Al <sub>2</sub> O <sub>3</sub> | 13.86 | 0.14  |
| SiO <sub>2</sub>               | 78.29 | 0.53  |
| K <sub>2</sub> O               | 3.14  | 0.22  |
| CaO                            | 1.33  | 0.20  |
| total                          | 100   |       |

An electron transparent foil (approximately 150 nm) for (S)TEM observations was prepared by focused ion beam (FIB-SEM, JIB4600F, JEOL). The FIB instrument was operated at 30 kV to make the specimen thickness <150 nm, and then at 10 kV during the final thinning process to avoid amorphous artefact formation on the foil surface and beam damage. The foil was analyzed using a JEM-2100F (JEOL) at an accelerating voltage of 200 kV. The same foil was also analyzed using Titan<sup>3</sup> G2 60-300 (FEI) with a monochromator and double spherical aberration correctors. An acceleration

26 voltage of 60 kV and probe current of 100 pA were used.

27 The entire interface between the glass and secondary minerals is shown in Fig. S1. Line profiles  
28 of the constituent elements across the interface are also displayed.

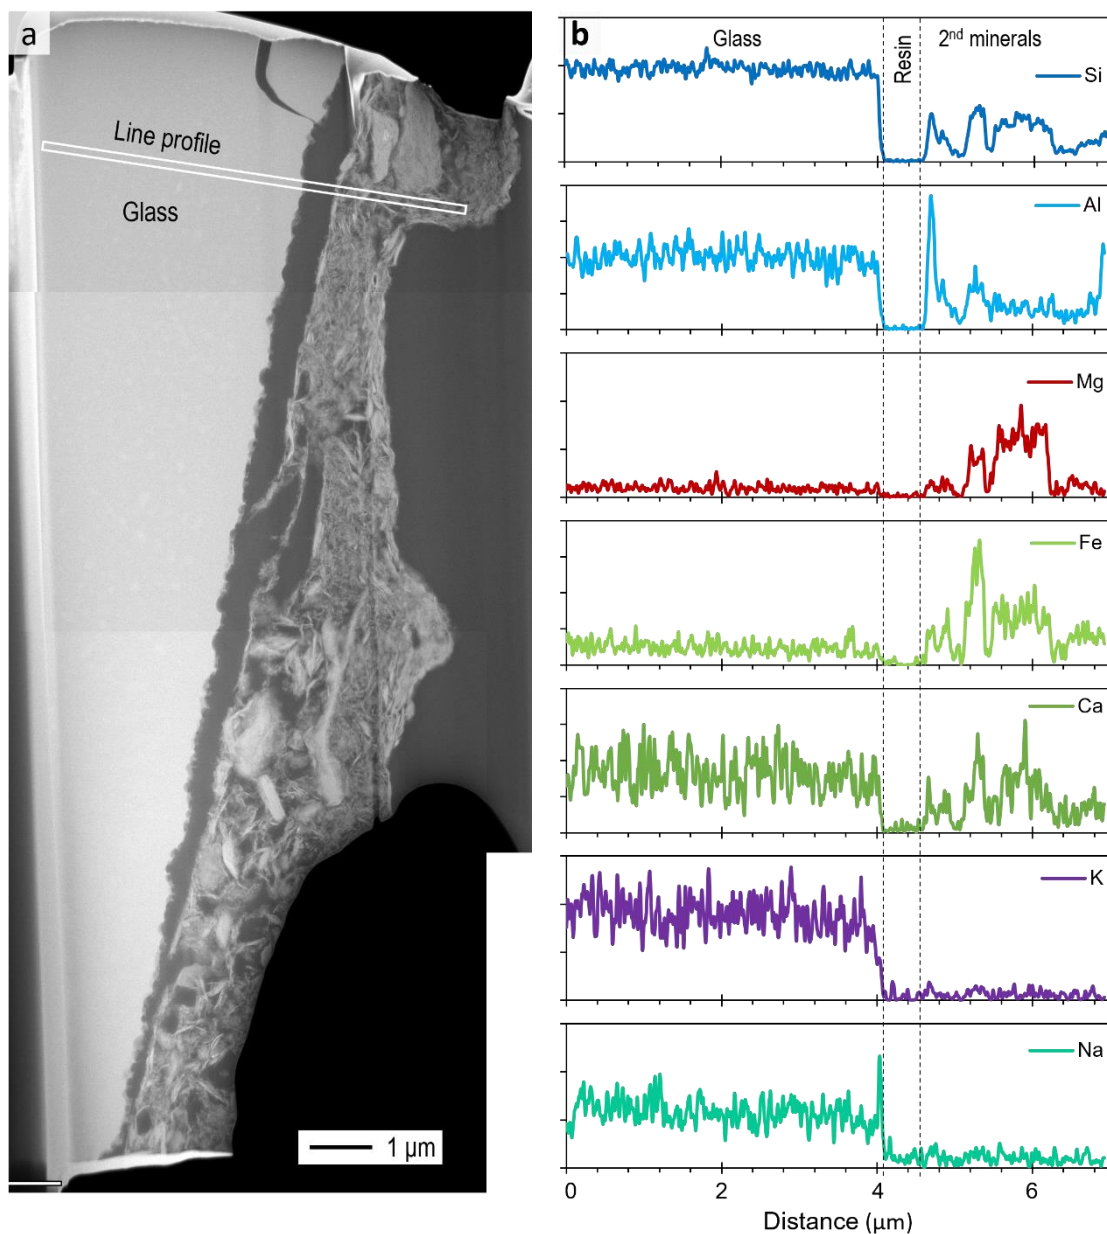

29

30 Fig. S1. HAADF-STEM image (a) and elemental profiles across glass-2<sup>nd</sup> minerals interface (b). Line  
31 profiles was taken from the left to the right side of the white rectangle with integrated at a width of  
32 100 nm.

33

34 The composition of the secondary minerals was examined using STEM-EDS (Fig. S2). This  
35 illustrates that spherical nanoparticles and more crystalline smectites aggregate together. The chemical

36 compositions are also shown in Fig.S2. Areas #2, 3 and 4 represent Mg-, Fe-, and Al-rich areas,  
 37 respectively. Their structural formula on the basis of  $O_{10}(OH)_2$  were calculated using the assumption  
 38 of  $Fe^{2+}$  or  $Fe^{3+}$  (Table S2). The Mg-rich area (i.e. #2) is considered to be saponite, although its  
 39 octahedral sheet has comparable amounts of Al and Mg, and slightly less Fe. The Fe-rich area was  
 40 interpreted as ferrian-saponite or nontronite. The Al-rich area can be interpreted as high-charge  
 41 smectite or dioctahedral vermiculite, based on their isomorphic substitution of tetrahedral sheet.  
 42 Considering the formation environment of dioctahedral vermiculite in the literature, its formation in  
 43 Narra is not likely due to the absence of micaceous precursors; it is thus more plausible to consider it  
 44 as a high-charge smectite. To compensate for the negative charge of the tetrahedral sheet, part of Fe  
 45 and Mg are suspected to be placed at the interlayer in addition to Ca. The similarity of the composition  
 46 of Areas #1 and #4 probably indicates that the low-crystalline, spherical nanoparticles correspond to  
 47 the precursor of Al-rich high-charge smectite.  
 48

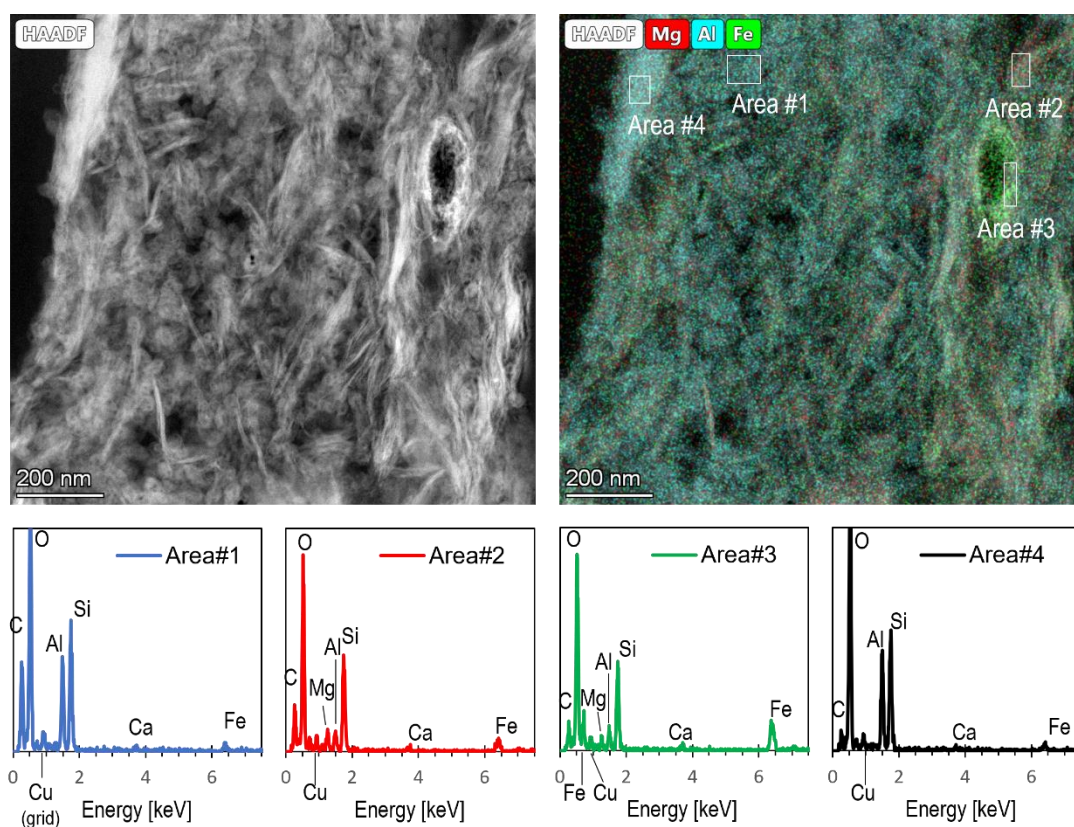

49  
 50 Fig. S2. Elemental distributions of secondary minerals.  
 51 The two images in the upper side are HAADF-STEM image and superimposed images including Mg,  
 52 Al and Fe distributions. The lower side shows four STEM-EDS spectra obtained from different areas  
 53 (i.e., Areas #1- #4 on the upper-right side).  
 54

Table S2. Cationic distributions based on  $O_{10}(OH)_2$ 

|                | Assumption of $Fe^{3+}$ |      |      |      | Assumption of $Fe^{2+}$ |      |      |      |      |
|----------------|-------------------------|------|------|------|-------------------------|------|------|------|------|
|                | #1                      | #2   | #3   | #4   | #1                      | #2   | #3   | #4   |      |
| Si             | 3.37                    | 4.03 | 3.70 | 3.21 | Si                      | 3.34 | 3.92 | 3.45 | 3.18 |
| $^{[IV]}Al$    | 0.63                    | 0.00 | 0.30 | 0.79 | $^{[IV]}Al$             | 0.66 | 0.08 | 0.55 | 0.82 |
| $\Sigma_{tet}$ | 4.00                    | 4.03 | 4.00 | 4.00 | $\Sigma_{tet}$          | 4.00 | 4.00 | 4.00 | 4.00 |
| $^{[VI]}Al$    | 1.87                    | 0.87 | 0.57 | 1.94 | $^{[VI]}Al$             | 1.81 | 0.76 | 0.26 | 1.88 |
| $Fe^{3+}$      | 0.21                    | 0.61 | 1.62 | 0.22 | $Fe^{2+}$               | 0.21 | 0.59 | 1.51 | 0.22 |
| Mg             | 0.20                    | 0.87 | 0.44 | 0.15 | Mg                      | 0.20 | 0.85 | 0.41 | 0.15 |
| $\Sigma_{oct}$ | 2.28                    | 2.35 | 2.64 | 2.31 | $\Sigma_{oct}$          | 2.22 | 2.20 | 2.18 | 2.25 |
| Ca             | 0.11                    | 0.17 | 0.22 | 0.11 | Ca                      | 0.10 | 0.16 | 0.21 | 0.11 |

56

57

58 **3. Mineral saturation index**

59 The water quality data of alkaline seepage from the bottom of the trench were obtained from the  
60 previous report of on-site measurements and concentrations of major cations and anions<sup>[1]</sup>. Chemical  
61 species activities and mineral saturation index was calculated using the Geochemist's Workbench with  
62 the thermodynamic database, "Thermmodem\_V1.10\_1Dec2020" provided by the Bureau de  
63 Resherches Géologiques et Minières (BRGM). Ca-, Mg-, and Fe- bearing mineral species among the  
64 zeolite and smectite groups were calculated (Table S3).

65

Table S3. Mineral saturation index

| Mineral names* | Chemical composition                            | Saturation index (log Q/K) |
|----------------|-------------------------------------------------|----------------------------|
| Analcime       | $Na_{0.99}Al_{0.99}Si_{2.01}O_6 \cdot H_2O$     | -3.889                     |
| Merlinoite(K)  | $K_{1.04}Al_{1.04}Si_{1.96}O_6 \cdot 1.69H_2O$  | -7.307                     |
| Merlinoite(Na) | $Na_{1.04}Al_{1.04}Si_{1.96}O_6 \cdot 2.27H_2O$ | -6.512                     |
| Chabazite      | $Ca(Al_2Si_4)O_{12} \cdot 6H_2O$                | -3.463                     |

|                        |                                                                                                                                                            |        |
|------------------------|------------------------------------------------------------------------------------------------------------------------------------------------------------|--------|
| Phillipsite(Ca)        | $\text{Ca}_{0.5}\text{AlSi}_3\text{O}_8 \cdot 3\text{H}_2\text{O}$                                                                                         | -4.052 |
| Saponite(Ca)           | $\text{Ca}_{0.17}\text{Mg}_3\text{Al}_{0.34}\text{Si}_{3.66}\text{O}_{10}(\text{OH})_2$                                                                    | 4.258  |
| Saponite(FeCa)         | $\text{Ca}_{0.17}\text{Mg}_2\text{FeAl}_{0.34}\text{Si}_{3.66}\text{O}_{10}(\text{OH})_2$                                                                  | -0.753 |
| Saponite(FeMg)         | $\text{Mg}_{0.17}\text{Mg}_2\text{FeAl}_{0.34}\text{Si}_{3.66}\text{O}_{10}(\text{OH})_2$                                                                  | -0.764 |
| Saponite(Mg)           | $\text{Mg}_{0.17}\text{Mg}_3\text{Al}_{0.34}\text{Si}_{3.66}\text{O}_{10}(\text{OH})_2$                                                                    | 4.245  |
| Saponite(SapCa)        | $\text{Na}_{0.394}\text{K}_{0.021}\text{Ca}_{0.038}(\text{Mg}_{2.949}\text{Fe}_{0.055})(\text{Si}_{3.569}\text{Al}_{0.397})\text{O}_{10}(\text{OH})_2$     | 3.459  |
| Hsaponite(Ca)          | $\text{Ca}_{0.17}\text{Mg}_3\text{Al}_{0.34}\text{Si}_{3.66}\text{O}_{10}(\text{OH})_2 \cdot 4.799\text{H}_2\text{O}$                                      | 7.132  |
| Hsaponite(FeCa)        | $\text{Ca}_{0.17}\text{Mg}_2\text{FeAl}_{0.34}\text{Si}_{3.66}\text{O}_{10}(\text{OH})_2 \cdot 4.799\text{H}_2\text{O}$                                    | 2.122  |
| Hsaponite(FeMg)        | $\text{Mg}_{0.17}\text{Mg}_2\text{FeAl}_{0.34}\text{Si}_{3.66}\text{O}_{10}(\text{OH})_2 \cdot 5.039\text{H}_2\text{O}$                                    | 2.324  |
| Hsaponite(Mg)          | $\text{Mg}_{3.17}\text{Al}_{0.34}\text{Si}_{3.66}\text{O}_{10}(\text{OH})_2 \cdot 5.039\text{H}_2\text{O}$                                                 | 7.333  |
| Nontronite(Ca)         | $\text{Ca}_{0.17}\text{Fe}^{3+}_{1.67}\text{Al}_{0.67}\text{Si}_{3.66}\text{O}_{10}(\text{OH})_2$                                                          | -2.494 |
| Nontronite(Mg)         | $\text{Mg}_{0.17}\text{Fe}_{1.67}\text{Al}_{0.67}\text{Si}_{3.66}\text{O}_{10}(\text{OH})_2$                                                               | -2.507 |
| Nontronite(Nau2)       | $\text{Na}_{0.247}\text{K}_{0.02}(\text{Fe}^{3+}_{1.688}\text{Al}_{0.276}\text{Mg}_{0.068})(\text{Si}_{3.458}\text{Al}_{0.542})\text{O}_{10}(\text{OH})_2$ | -1.873 |
| Hnontronite(Ca)        | $\text{Ca}_{0.17}\text{Fe}^{3+}_{1.67}\text{Al}_{0.67}\text{Si}_{3.66}\text{O}_{10}(\text{OH})_2 \cdot 4.24\text{H}_2\text{O}$                             | -0.675 |
| Hnontronite(Mg)        | $\text{Mg}_{0.17}\text{Fe}_{1.67}\text{Al}_{0.67}\text{Si}_{3.66}\text{O}_{10}(\text{OH})_2 \cdot 4.098\text{H}_2\text{O}$                                 | -0.505 |
| Montmorillonite(HcCa)  | $\text{Ca}_{0.3}\text{Mg}_{0.6}\text{Al}_{1.4}\text{Si}_4\text{O}_{10}(\text{OH})_2$                                                                       | -3.809 |
| Montmorillonite(HcMg)  | $\text{Mg}_{0.3}\text{Mg}_{0.6}\text{Al}_{1.4}\text{Si}_4\text{O}_{10}(\text{OH})_2$                                                                       | -3.888 |
| Montmorillonite(MgCa)  | $\text{Ca}_{0.17}\text{Mg}_{0.34}\text{Al}_{1.66}\text{Si}_4\text{O}_{10}(\text{OH})_2$                                                                    | -6.066 |
| Hmontmorillonite(HcCa) | $\text{Ca}_{0.3}\text{Mg}_{0.6}\text{Al}_{1.4}\text{Si}_4\text{O}_{10}(\text{OH})_2 \cdot 4.288\text{H}_2\text{O}$                                         | -1.291 |
| Hmontmorillonite(HcMg) | $\text{Mg}_{0.3}\text{Mg}_{0.6}\text{Al}_{1.4}\text{Si}_4\text{O}_{10}(\text{OH})_2 \cdot 5.129\text{H}_2\text{O}$                                         | -0.715 |
| Hmontmorillonite(MgCa) | $\text{Ca}_{0.17}\text{Mg}_{0.34}\text{Al}_{1.66}\text{Si}_4\text{O}_{10}(\text{OH})_2 \cdot 4.265\text{H}_2\text{O}$                                      | -3.751 |

\*Names registered in thermodynamic database, "Thermoddem\_V1.10\_1Dec2020".

66

#### 67 4. Estimation of the glass dissolution rate

##### 68 4.1. Calculating a spherical glass lifetime

69 To estimate the lifetime of natural glass, the following equation for spherical grain dissolution<sup>[2]</sup>:

70

$$t_{\text{lifetime}} = \left( \frac{rad}{V_m r_{\text{geo}}} \right) \quad (1)$$

71 where  $rad$  denotes the grain radius,  $V_m$  is the molar volume where a mole of glass is assumed to contain  
72 one Si atom and  $r_{geo}$  refers to the dissolution rate normalized by the geometric surface area. Based on  
73 the chemical composition of the glass (Table S1), its structural formula was  $Si_1 Na_{0.06} Mg_{0.003} Al_{0.212}$   
74  $K_{0.05} Ca_{0.02} O_{2.39}$  (with molecular weight: 76.26 g mol<sup>-1</sup>). Since we cannot accurately measure the  
75 density of the glass, we assumed 2.4 g cm<sup>-3</sup> to be as a reasonable value for rhyolitic glass based on the  
76 literature<sup>[3]</sup>, and then molar volume  $V_m$  was ~31.78 cm<sup>3</sup> mol<sup>-1</sup>. Thus, given a certain dissolution rate  
77  $r_{geo}$ , the equation  $rad-t_{lifetime}$  can be obtained.

#### 79 4.2. Dissolution rates in literature

80 For the dissolution rate (in g m<sup>-2</sup> s<sup>-1</sup> or mol m<sup>2</sup> s<sup>-1</sup>) in the literature, there are two ways of using surface  
81 area for normalization: one provides a geometric surface area ( $S_{geo}$ ) and the other provides a surface  
82 area determined by the Brunauer-Emmett-Teller (BET) method ( $S_{BET}$ ). The standard test methods for  
83 glass corrosion often use  $S_{geo}$  based on a shrinking core model that uses the initial grain sizes and mass  
84 change during the corrosion tests<sup>[4]</sup>. Since the BET measurement was hardly applied to the glass in  
85 this study, we adopted the dissolution rates normalized by  $S_{geo}$  rather than,  $S_{BET}$ .

86 The dissolution rate for rhyolitic glass at pH 10.6at 25°C<sup>[3]</sup> was cited. Based on their proposed  
87 equation for the dependence of rates on the SiO<sub>2</sub> concentration, the dissolution rates at 78.3 SiO<sub>2</sub> in  
88 wt% was calculated to suit the glass in this study. Note that the pH and temperature deviated slightly  
89 from the conditions in this study. Data from another dissolution tests<sup>[5]</sup> was also cited for comparison.  
90 From their data showing dissolution rates versus pH at different temperature (Fig.1 in their report<sup>[5]</sup>),  
91 the dissolution rate at pH 11.2, 28°C and pH 9.5, 28°C were interpolated and found to be ~ 10<sup>-1.7</sup> and  
92 10<sup>-2.1</sup> g m<sup>-2</sup> d<sup>-1</sup>, respectively. The rates were then converted to ~ 10<sup>-8.52</sup> and 10<sup>-8.92</sup> mol m<sup>-2</sup> s<sup>-1</sup>  
93 respectively, using the molecular weight of the glass in this study. In the corrosion test conducted in  
94 the above<sup>[5]</sup>, they used EWG-C glass (i.e., 42.96 SiO<sub>2</sub> in wt%) and thus, one might question whether  
95 it can be used as a dissolution rate for rhyolitic glass; however, they conclude that the effect of  
96 chemical compositions on the dissolution rate is smaller than the dependence on temperature and pH.  
97 Therefore, it is probably more important to match the pH and temperature with those in the present  
98 study, and we adopted their data.

99 Compared to the experimental works, few literatures have estimated the dissolution rates of  
100 rhyolitic glass in the natural environment. We have cited the dissolution rates under near neutral pH  
101 in this paper<sup>[6]</sup>. They normalized the dissolution rate by  $S_{BET}$ , and  $S_{geo}$  is not determined because of  
102 the bubbled shapes. Considering that the surface roughness ( $S_{BET}/S_{geo}$ ) of rhyolitic glass was reported  
103 to be 13 – 94<sup>[3]</sup>, we assumed that the rhyolitic glass roughness lies between 10 and 100. Thus, a rate  
104 one to two orders of magnitude higher than that reported<sup>6</sup> would be the dissolution rate assuming a  
105 geometric surface area. Figure 5 shows two lines at the upper and lower limits.

107 4.3. Estimating the original glass size

108 In this study, the initial grain size of glass was estimated from the current grain size of crystalline  
109 minerals, assuming that there was no significant size change due to the dissolution of crystalline  
110 materials. Although Crystalline minerals such as hornblende are thought to be partially dissolved by  
111 the reaction of hyperalkaline water, the dissolution rate of crystalline feldspar is approximately three  
112 orders of magnitude slower than that of glass<sup>[7]</sup>. Thus, dissolution of crystalline minerals is expected  
113 to be much slower than that of glass. Judging from the grain boundaries of crystalline minerals without  
114 a distinguishable alteration layer and the well-preserved bubble-wall shape of the glass, significant  
115 dissolution of the crystalline grains was unlikely. Therefore, changes in size due to the dissolution of  
116 crystalline minerals is considered negligible, at least for the spatial resolution in the SEM observations.

117 The grain-size estimation procedure is as follows. The grain size of the constituent minerals of  
118 volcanic ash can be visualized using SEM back-scattered electron images at low magnification (Fig.  
119 S3). Since the contrast is distinctly higher for hornblende than for glass, feldspar, and quartz,  
120 hornblende particles can be easily extracted by setting a threshold on the image contrast. The area of  
121 each particle was measured using the particle analysis function in ImageJ. Note that the sample  
122 includes not only hornblende but also fine particles with bright contrast (mainly Fe or Ni oxides in the  
123 serpentinite lithic). Therefore, particles with an area of less than 10  $\mu\text{m}^2$  were excluded from the  
124 following calculation to remove these fine particles. Then, the radius of each grain was calculated  
125 assuming that each grain had a circular shape. The maximum radius of the measured hornblende  
126 particles ( $n = 600$ ) was 37.36  $\mu\text{m}$ , and the median was 9.7  $\mu\text{m}$ . The entire list of the analyzed particles  
127 can be found in the Supplementary data file (Supplementary Table4). By adopting the maximum radius  
128 as a conservative estimation for the dissolution rate, we concluded that the maximum size of the initial  
129 glass would be approximately 40  $\mu\text{m}$ .

130

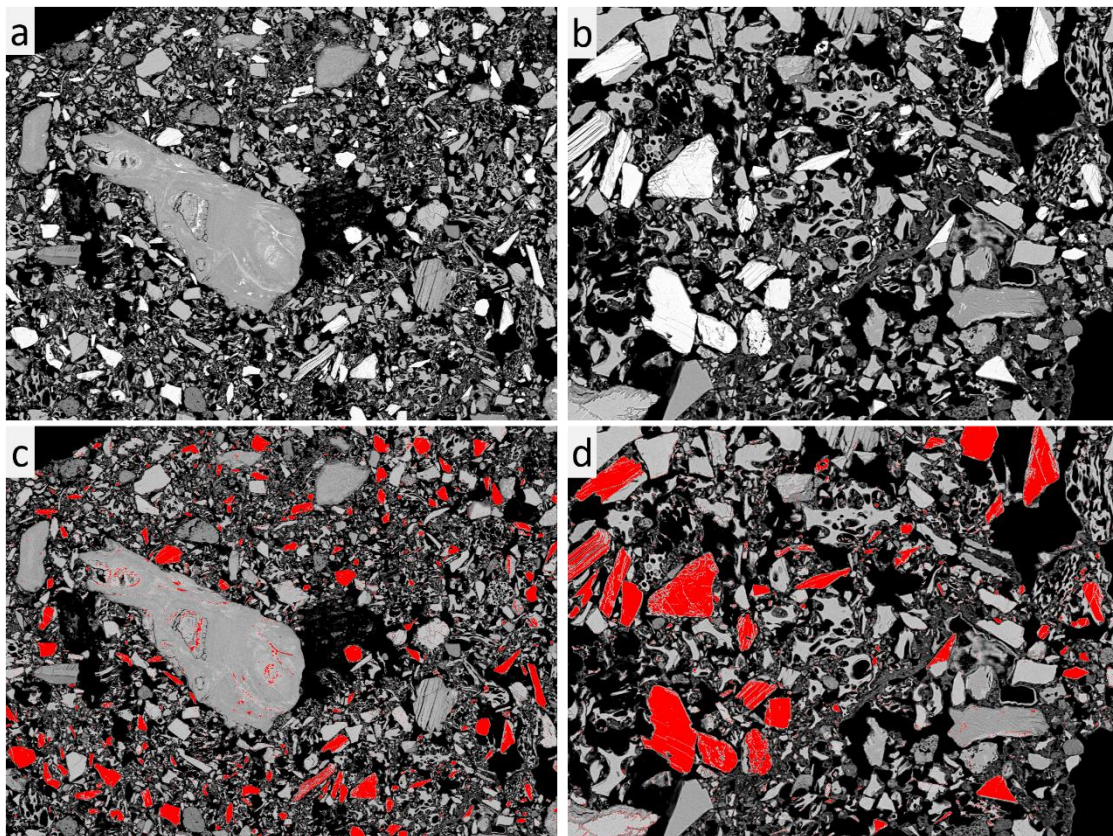

131

132 Fig. S3. Particle size analysis for hornblende grains

133 (a, b) Back-scattered electron images. The largest grain from the center to the upper-left side in (a) is

134 serpentinite lithic. (c, d) Red represents the hornblende grains extracted using a brightness threshold.

135 Scale bars are 100  $\mu\text{m}$  for each image.

136

137

### 138 References in Supplementary Information

- 139 1. Shimbashi, M., Sato, T., Yamakawa, M., Fujii, N. & Otake, T. Formation of Fe- and Mg-rich  
140 smectite under hyperalkaline conditions at narra in Palawan, the Philippines. *Minerals* **8**, 1–16  
141 (2018).
- 142 2. Lasaga, A. C. *Kinetic theory in Earth Sciences*. (Princeton University Press, 1998).
- 143 3. Wolef-Boenisch, D., Gislason, S. R., Oelkers, E. H. & Putnis, C. V. The dissolution rates of  
144 natural glasses as a function of their composition at pH 4 and 10.6, and temperatures from 25 to  
145 74°C. *Geochim. Cosmochim. Acta* **68**, 4843–4858 (2004).
- 146 4. Thorpe, C. L. *et al.* Forty years of durability assessment of nuclear waste glass by standard  
147 methods. *npj Mater. Degrad.* **5**, (2021).
- 148 5. Vienna, J. D., Neeway, J. J., Ryan, J. V. & Kerisit, S. N. Impacts of glass composition, pH, and  
149 temperature on glass forward dissolution rate. *npj Mater. Degrad.* **2**, 1–12 (2018).

- 150 6. Yokoyama, T. & Banfield, J. F. Direct determinations of the rates of rhyolite dissolution and clay  
151 formation over 52,000 years and comparison with laboratory measurements. *Geochim.*  
152 *Cosmochim. Acta* **66**, 2665–2681 (2002).
- 153 7. Bourcier, W. L. *Affinity functions for modeling glass dissolution rates* (No. UCRL-JC-131186).  
154 *Atomic Energy Commission-Valee due Rhone Summer Workshop: Glass: Scientific Research for*  
155 *High Performance Contaminant Mejanne-le-Clap, France* (1998).  
156
